# Supplementary material
Source: HighWire-hosted journal article supplement (https://gut.bmj.com/content/gutjnl-2018-317715)
Supplement: inline-supplementary-material-1 [file inline-supplementary-material-1.pdf]

# 1 Materials & Methods

## 2 Patient cohort

3 All samples from participants in the cohort are publicly available (see database below), with the  
4 exception of samples listed in Suppl. Table 8. These samples were obtained from a Heidelberg  
5 centered cohort within the my.microbes project (my.microbes.eu), as described in greater detail  
6 in [1]. The study was approved by the EMBL Bioethics Internal Advisory Board and adheres to  
7 the WMA Declaration of Helsinki. Fecal samples were collected and conserved under anaerobic  
8 conditions and kept for long term storage at -80°C, after a brief short-term storage period at -  
9 20°C. Patient HD.S1 was undergoing bowel cleansing on day 630 for a routine colonoscopy  
10 unrelated to the study.

11 Furthermore, patient HD.S1 was treated twice with antibiotics, first on days 370-374 with 2g/day  
12 intravenous ceftriaxone. The last injection with ceftriaxone occurred approximately ~12-24 hours  
13 before HD.S1.374 fecal sample collection. The patient was being treated for a bacterial infection  
14 after a kidney stone operation. We assume that at the time of collection of sample “HD.S1.374”,  
15 there were still significant concentrations of ceftriaxone (12-25% of treatment dose) in the  
16 patient’s urine and feces. This assumption is based on the elimination half-life of ceftriaxone  
17 being 5.8-8.7 hrs, and 12 hrs for patients with renal impairment  
18 (<https://www.drugs.com/pro/ceftriaxone.html>, subject HD.S1 had a kidney stone operation). The  
19 second antibiotic treatment lasted six days, starting on day 875, with CefuHEXAL® 500 mg, 2  
20 oral tablets per day.

21

## 22 Sequencing of fecal samples

23 Genomic DNA was extracted from frozen fecal samples as previously described [1] using the  
24 GNOME© DNA Isolation Kit (MP Biomedicals). Library generation and random shotgun  
25 sequencing of fecal samples was carried out on the Illumina HiSeq 2000/2500 (Illumina, San  
26 Diego, CA, USA) platform. All samples were paired-end sequenced with 100 bp read lengths at  
27 the Genomics Core Facility, European Molecular Biology Laboratory, Heidelberg, to an  
28 approximated sequencing depth of 5 Gbp per sample. Further, sample HD.S1.377 was  
29 sequenced to greater depth and with longer reads using the Illumina MiSeq platform, obtaining  
30 2x250 bp paired end reads. In addition to this, sample HD.S1.377 was sequenced with mate  
31 pair sequencing using Illumina Nextera Mate Pair Library Prep Kit to assist genomic assemblies  
32 of *U.B. ceftriaxensis* and *P. distasonis*.

33

#### 34 **Attempted culturing of <sup>U</sup>*B. ceftriaxensis***

35 The RAST annotation of <sup>U</sup>*B. ceftriaxensis* served as basis to create a metabolic profile to guide  
36 the selection of carbohydrates for isolating this species (Suppl. Table 1). The faecal samples  
37 (~0.25g) at day 375 containing ~60% and day 374 containing ~90% of the novel species were  
38 dissolved in 5ml PBS/20% Glycerol under anaerobic conditions. The basic media was CPYC  
39 (CP medium [2] with an addition of Yeast extract 2.5g/l Casitone 10g/l). The additional  
40 carbohydrates were added to 25mM end concentration. The carbohydrates used were either  
41 Rhamnose, Trehalose, Raffinose, Ribose, Lactose, Sucrose, Maltose, Glycerol, Xylose, Xylan,  
42 Mannose, Galactose and a mix of all carbohydrates together. Apart from liquid cultures solid  
43 media was also used to attempt isolation of the species. The plates contained BHI or CPYC  
44 supplemented with the above mentioned carbon sources. All bottles were inoculated with  
45 ~100ul of fecal sample/PBS/Glycerol. Plates were streaked and incubated at 37°C.

46 After incubation the liquid cultures were inoculated in new bottles with their carbohydrate and  
47 anaerobically plated on BHI with their selective carbon for isolation. This process was repeated  
48 until pure cultures or single colonies were apparent. Additionally, 16S specific primers based on  
49 the <sup>U</sup>*B. ceftriaxensis* 16S were designed (Suppl. Table 2) with NCBI Primer Blast<sup>1</sup> for screening  
50 the obtained enrichments. Using these primers on the culture media, we were able to detect the  
51 species in ribose- and rhamnose-supplemented media. Subsequently, the 16S rRNA gene of  
52 the isolates was sequenced using the Sanger method to confirm the isolate's identity. However  
53 we did not retrieve identical 16S sequences to TEC-2, instead recovering (based on 16S  
54 similarity >= 98%) *Eggerthella lenta*, *Tetragenococcus koreensis*, *Lactobacillus rhamnosus* and  
55 *Intestinibacter bartlettii*.

56

#### 57 **Fluorescence *in situ* hybridization to detect <sup>U</sup>*B. ceftriaxensis* in fecal samples**

58 Oligonucleotide probes specific for <sup>U</sup>*B. ceftriaxensis* 16S rRNA were designed using the probe  
59 design tool implemented in ARB (SILVA Release 132 [3]). Specific hybridization conditions were  
60 predicted *in silico* using mathFISH (<http://mathfish.cee.wisc.edu>) and were experimentally  
61 validated by CLONE-FISH against the target region heterologously transcribed in *Escherichia coli*  
62 as detailed in [4]. Probe TEC483 (5'-CGA GGC TTG CTA TTG GGA TAC CG-3') was chosen for  
63 FISH experiments and was synthesized double Cy3 labelled at 5'- and 3'- ends (Sigma-Aldrich,  
64 Steinheim, Germany). Fecal samples were suspended in 1% paraformaldehyde: dPBS, fixed

---

<sup>1</sup> [https://www.ncbi.nlm.nih.gov/tools/primer-blast/index.cgi?LINK\\_LOC=BlastHome](https://www.ncbi.nlm.nih.gov/tools/primer-blast/index.cgi?LINK_LOC=BlastHome)

65 overnight at 4°C and stored in 50% EtOH:dPBS at -20°C until further processing. Cell  
66 preparations were heat fixed on glass slides and hybridized for 2 hours in 30% formamide  
67 hybridization buffer as described in [4].

68

### 69 **Bacterial cell counting using flow cytometry**

70 To analyze the density of bacteria cells, 100 µL of frozen stools were suspended in 0.9% saline  
71 solution and diluted 1:100. Samples were homogenized by vortexing with sterile Rattler™ Platting  
72 Beads (Zymo Research). To remove all remaining big particles, the suspension was filtrated by  
73 gravity flow through a 40 µm Cell Strainer (Falcon®). Samples were further diluted to 1:1000 000  
74 and stained using a modified protocol for Bacteria Counting Kit (Invitrogen™). Briefly, 1 µL of  
75 SYTO® BC bacteria stain was added to 1.0 mL of diluted cells and incubated in darkness at 37°C,  
76 for 30 min. Bacteria were centrifuged at 10,000 rpm for 15 min and the pellet was re-suspended  
77 in 500 µL of 4% paraformaldehyde and incubated for 30 min at RT. Fixed cells were washed and  
78 re-suspended in 1 mL of saline solution. 10 µL of the Bacteria Counting Kit (Invitrogen™)  
79 microsphere standard suspension were added and cells were analysed using LSRFortessa™  
80 (BD) with excitation 488 nm and emission at 530/30 nm. The number of bacterial cells per number  
81 of microspheres was used to calculate the density of bacteria in 1 mL of stool sample in triplicate.  
82 The mean of the triplicate value was then used to determine cell density per sample.

83

### 84 **Assessing of beta-lactamase activity and antibiotic resistance**

85 Both beta-lactamase genes found in *U. B. ceftriaxensis* were placed under the control of the amp  
86 promoter into the pMK-RQ backbone (kanR). The CTX-M 15 beta-lactamase encoded on the  
87 pEC499 plasmid was used as a positive control (Woodford et al. 2009). All constructs were  
88 ordered ready to use from GeneArt AG and transformed into *E. coli* (strain DH5α) for  
89 constitutive beta-lactamase expression.

90 Antibiotic resistance was assessed on LB-amp and LB-ceftriaxone plates at antibiotic  
91 concentrations of 100 mg/l and 159 mg/l, respectively. Beta-lactamase activity was tested using  
92 nitrocefin disks (Sigma) that change color from yellow to red when beta-lactamase activity is  
93 detected.

94

### 95 **Read filtering**

96 Reads obtained from the shotgun metagenomic sequencing of the 129 metagenomic samples  
97 from the focused dataset were quality-filtered by removing reads shorter than 70% of the  
98 maximum expected read length (100 bp, 250 bp for miSeq data, 150 bp for mate pair reads),

99 with an observed accumulated error >2 or an estimated accumulated error >2.5 with a  
100 probability of  $\geq 0.01$  [5], or >1 ambiguous position. Reads were trimmed if base quality dropped  
101 below 20 in a window of 15 bases at the 3' end, or if the accumulated error exceeded 2 using  
102 the sdm read filtering software [6]. Human reads were removed from the metagenomic data by  
103 classifying raw reads with kraken [7] against a custom database containing solely the human  
104 reference genome. Unclassified reads were further used in downstream analysis.

105

### 106 **Estimating abundance of genomes**

107 To estimate if a genome was present, we first mapped reads from all samples against the  
108 reference genomes obtained from NCBI with the same mapping procedure and depth  
109 estimation as described above. From these mappings we estimated the horizontal coverage  
110 across the genome and the total number of reads mapping to a reference. Because these  
111 genomes could be extremely low abundant in the timeseries data, often having a horizontal  
112 coverage < 25%, we instead used the following formula to estimate the expected coverage  
113 ( $E_{cov}$ ), following [8], with  $G_L$  being genome length,  $n$  the number of mapped reads and  $R_L$  being  
114 the read length:

$$115 \quad E_{cov} = 1 - G_L * \exp\left(\frac{-n * R_L}{G_L}\right)$$

116

117 Since the mapping was prone to attracting short reads to conserved or mobile genes, that is  
118 genomic regions with extreme coverage, we used a standard MD filter [9] to remove obviously  
119 overrepresented genomic regions prior to calculating the expected coverage,.

120 Comparing the observed coverage ( $O_{cov}$ ) and expected horizontal coverage, we only accepted  
121 genomes as being present, if  $0.5 < E_{cov} / O_{cov} < 2$  (arbitrarily chosen). The ratio of  $E_{cov} / O_{cov}$  as  
122 well as  $O_{cov}$  is reported in (Fig. 5)

123

### 124 **Metagenomic assembly and gene catalog**

125 Only sdm [6] filtered paired reads were used in the assembly, with the same read filtering  
126 parameters as described above. In total 10,865,401,856 reads were assembled using Spades  
127 3.7-0 (development version obtained from the authors) [10] in metagenomic mode with the  
128 parameters “--only-assembler -m 500 --meta -k 21,33,67,111,127”. The samples were  
129 assembled separately for each biological sample, to decrease the chances for chimeric contigs,  
130 but technical replicates were pooled. The assembled contig had an average N50 of 14,041 bp,  
131 scaffold average N50 was 17,128 bp and a total size of 31,782 Mbp. Using prodigal [11] in

132 metagenomic mode, 38,943,896 genes were predicted on the contigs. Only genes with >100 bp  
133 length were selected and split into 15,558,517 complete genes and 47,076,247 incomplete  
134 genes. The average complete gene length was  $897 \pm 65$  bp.

135

136

137 In a first step, the complete genes were clustered at 95% nucleotide identity, a commonly used  
138 cutoff in constructing gene catalogues (Sunagawa, Coelho, Chaffron, Kultima, Labadie, Salazar,  
139 et al. 2015). For sequence clustering CD-HIT v4.6.1 [12] was used in est mode, employing  
140 parameters adapted to full length genes: “-n 9 -G 1 -aS 0.95 -aL 0.6 -d 0 -c 0.95 -g 0”. This  
141 resulted in 3,257,016 clustered full length genes, onto which the incomplete genes were  
142 mapped with bowtie2 [13]. Incomplete genes mapping with at least 95% nucleotide identity were  
143 directly integrated into the initial clustering of complete genes. The remaining sequences were  
144 clustered as before with CD-HIT, but changing alignment length parameters to “-aL 0.3 -aS 0.8”  
145 to account for incomplete genes, resulting in 2,466,595 additional gene clusters. Additionally,  
146 genes belonging to the 40 conserved marker genes were clustered separately, using clustering  
147 identity thresholds as described in [14]. Merging marker gene clusters, incomplete and complete  
148 clustered genes resulted in the gene catalogue, with a total of 5,790,967 non-redundant genes  
149 at 95% nucleotide identity cut-off. The gene catalogue nucleotide and amino acid sequences  
150 are available at [http://vm-lux.embl.de/~hildebra/Bcef\\_GC](http://vm-lux.embl.de/~hildebra/Bcef_GC).

151

## 152 **Estimating species abundances in metagenomes**

153 To estimate the species abundance per sample and at the same time also infer the species not  
154 in our database, we used the 40 single copy ubiquitously present marker genes (MGs) that can  
155 be predicted using specl [14] in the gene catalog. Since hidden markov models trained on the  
156 tree of life are used for this prediction, we can assume that the MGs of unknown classes,  
157 families, genera will be detected in this approach. From this set of marker genes, we used a  
158 similarity based approach to identify species within these, mapping all predicted MGs with  
159 lambda 1.9.3 [15] onto MGs clustered to specl's in the proGenomes database [16] and using a  
160 MG specific similarity cutoff [14]. Hits were immediately accepted, if a metagenomic MG was  
161 hitting a single proGenomes specl at the required similarity threshold. However, since several  
162 metagenomic MGs had valid hits to multiple proGenomes MGs, we supplemented the  
163 identification of a species using a coabundance approach, in concept similar to [17]. Briefly, first  
164 for established specl's we calculated the average profile across all MGs. If the MG showed  
165 similarity to a given specl, i.e. was a candidate, the remaining MGs that were not uniquely

166 assigned to a spec1 were correlated to existing spec1 profiles. Here we also used species and  
167 genus taxonomic assignments, to allow for mismatches in nucleotide sequence. MG's with a  
168 spearman correlation coefficient  $> 0.9$  to a candidate spec1 were immediately added to a given  
169 spec1.

170 Additionally, at different phases in the clustering algorithm, within each spec1, MGs were  
171 checked to correlate with the average profile (spearman)  $< 0.9$ , or were removed as false  
172 positive assignments and iteratively tried to be added to different spec1's, as described above.

### 173 **Mapping reads against references**

174 To estimate the abundance of genes in each assembly, the reads from a sample were mapped  
175 against the assembly of these. Furthermore, in specific cases also all reads were mapped  
176 against reference genomes (to estimate genome presence) or reference genome + decoy set  
177 (see below) to map reads against a reference genome in order to call genetic variants. For  
178 these use cases, all unfiltered reads were used in the mapping, irrespective of quality. This was  
179 important as we were interested in very low abundant species and quality filtered reads were in  
180 this project important to ensure a clean assembly; if reads were mapping at a good quality  
181 against this assembly it was assumed that their quality was sufficient. To ensure good matches,  
182 bowtie2 [13] was used with the options "--no-unal --end-to-end --score-min L,-0.6,-0.6" and  
183 additionally "-X 10000" in the case of mate pair libraries. The resulting bam files were sorted,  
184 duplicates removed and indexed using samtools 1.3.1 [18]. From these depth profiles were  
185 created using bedtools which were translated with a custom C++ program "rdCov"  
186 (<https://github.com/hildebra/rdCover>) into average coverage in a 50 bp window, per contig or per  
187 gene predicted on each contig.

188

### 189 **Functional annotations of protein sequences**

190 Translated amino acid sequences of either complete genomes, gene catalogs or contigs were  
191 predicted with prodigal [11] in normal mode, or metagenomic mode for the latter two cases.

192 These amino acid sequences were mapped to functional reference databases using diamond  
193 [19] in blastp mode using options "-k 5 -e 1e-5 --sensitive". The reported mapping were further  
194 filtered using customized Perl scripts, with filtering parameters set according on simulations  
195 reported previously (Bahram et al. 2018). In general, we required for each database that hits  
196 had  $>25\%$  AA identity,  $>30\%$  gene coverage,  $>60$  bit score,  $>60$  AA acid alignment length and  
197 an e-value  $<1e-7$ . The highest scoring hit was then accepted.

198 The following databases were used for functional assignments: Cazyyme genes

199 (<http://www.cazy.org>, accessed 22.11.2015)[20], KEGG [21], antibiotic resistance genes

200 (ARG's) curated in CARD [22] and eggNOG 4.5 database of functional orthologs [23] genes.  
201 For ARG, only hits scoring better than the CARD curated cutoffs [22] were accepted.  
202 Further, we created from PATRIC [24] a virulence factor specific database. The gene, protein  
203 and genome sequences of the PATRIC database, along with the sets of 'specialty genes'  
204 assignments made by its curators, was downloaded in November, 2017. From this dataset was  
205 parsed assignments to the PATRIC virulence factor classifications, with genes not assigned to a  
206 virulence factor considered a true negative given the denseness of the database. The VF gene  
207 symbols and classes together with the sequences were considered as input data for further  
208 steps annotating metagenome-derived entities with virulence factor information.  
209 To facilitate interpretation of the results, the relative abundance of CAZyme genes were summed  
210 based on the substrates for each gene family. Substrate utilization information for CAZyme  
211 families was obtained from [25,26] as well as CAZypedia (<http://www.cazypedia.org/>). SEED  
212 functional annotations were obtained from the web interface of RAST [24]. Based on the KEGG  
213 Ortholog (KO) abundance matrices we further calculated KEGG and GMM (Darzi et al. 2016)  
214 module abundances using a custom C++ implementation available on  
215 [www.github.com/hildebra/Rarefaction](http://www.github.com/hildebra/Rarefaction), similar to the protocol described in [27].  
216 Functional abundance matrices were normalized by total number of reads used in mapping. This  
217 normalization considers differences in library size and includes the fraction of unmapped (that is  
218 functionally unclassified) reads. Replication times of assembled genomes were estimated using  
219 [28].

220

## 221 **Genome binning**

222 Genomes were de novo binned for *U. B. ceftriaxensis* and *P. distasonis*. This was based on  
223 binning samples HD.S1.374 and HD.S1.377, respectively, with MaxBin [29] and a data set wide  
224 binning via Canopy clustering [17]. MaxBin was run with default options, except for the changed  
225 option “-min\_contig\_length 400”.

226 Canopy clustering was run with options to optimize for rare, highly abundant species: “-p TC --  
227 die\_on\_kill --stop\_criteria 250000 --cag\_filter\_min\_sample\_obs 5 --  
228 cag\_filter\_max\_top3\_sample\_contribution 1 --filter\_max\_top3\_sample\_contribution 1” on a gene  
229 abundance matrix that was normalized by sum using rtk [30]. The gene bins of both binning  
230 methods were combined and the abundance profiles of the respective genes further analyzed in  
231 R.

232 For each species, a pearson correlation matrix for the candidate gene profiles were created,  
233 and the inverse of correlation coefficient was used to hierarchically cluster these (R function

234 hclust, method = complete). The hierarchical cluster was iteratively subdivided, until all 40  
235 marker genes were in the same cluster (illustrated in Suppl. Fig. 16 for *U*B. *ceftriaxensis*). Based  
236 on this clustering, the metagenomic assembly was selected combining most target genes in the  
237 fewest scaffolds. In a last step the scaffolds based on HiSeq paired end reads were further  
238 scaffolded with mate pair reads (insert size = 5000) from sample HD.S1.377. The mate pair  
239 reads were mapped onto the selected species contigs using bowtie2 [13]. Based on these  
240 mappings, scaffolds were calculated using BESST [31] using default parameters with the  
241 exception of “-z 5000”. In the case of *U*B. *ceftriaxensis*, this decreased the number of scaffolds in  
242 the primary Spades assembly from 20 to 8 scaffolds. Genome completeness was estimated  
243 using CheckM [32] and MiGA [33].

244

#### 245 **Phylogeny of *U*B. *ceftriaxensis***

246 From the proGenomes database [16], we selected a random subset representing each  
247 Firmicutes family within the database with at least one genome, but where available  
248 representing each genera in the database. Further, this tree was supplemented in August 2017  
249 with marker gene based searches in NCBI for complete genomes that had a high similarity to  
250 the *U*B. *Ceftriaxensis* marker genes. Further, we also included 3 genomes based on  
251 metagenomic binning [17] (CAGs, co-abundance groups), because the marker genes of *U*B.  
252 *ceftriaxensis* showed similarities to these genomes, when searching NCBI NR.

253 For all genomes in this database (n=242) two sets of marker genes were extracted. First the  
254 16S rRNA gene was obtained from each genome with RNAmmer [34], which reduced the  
255 species set to 236 genomes since the CAG's did not have a detectable 16S rRNA gene and 3  
256 further genomes no reference 16S gene could be found. The 16S sequences were aligned with  
257 Clustal Omega [35] with default options and inspected by hand. Subsequently a maximum  
258 likelihood tree was constructed with IQ-TREE[36] using ModelFinder [37] to find the best  
259 substitution model and calculating 100 bootstrapped trees and using booster [38] to calculate  
260 the bootstrap support.

261 Second, a phylogenetic tree was constructed from 40 single copy universally present marker  
262 genes. These were obtained with fetchMG [14]. The genes were translated into amino acid  
263 sequences and aligned separately for each of the 40 orthologues gene groups with Clustal  
264 Omega [35] (default options). Subsequently, the multiple sequence alignments were quality  
265 controlled with trimal (options -keepheader -ignorestopcodon -gt 0.1 -cons 60) and merged. The  
266 phylogenetic tree was reconstructed from this amino acid alignment of 40 orthologues from 242  
267 genomes using IQ-TREE, as described above to obtain phylogenetic trees with bootstrap



268 support. Both maximum likelihood trees were visualized using iTOL [39]. The nucleotide and  
269 amino acid identity between sequences was calculated from either multiple sequence  
270 alignment, using custom Perl scripts (included in MATAFILER).

271

## 272 **Global distribution <sup>U</sup>*B. ceftriaxensis***

273 The abundance of <sup>U</sup>*B. ceftriaxensis* was measured in our global (n=3,692) sample set, using the  
274 mOTU approach [40] and including custom marker genes derived from the genome assembly.  
275 Our reference database contained 70 internal German samples [1,41], 368+156 Chinese cancer  
276 samples [42,43], 1209 American HMP samples [44], 194 German colorectal cancer samples  
277 [45], 387 Danish samples [27], 145 Swedish Samples [46]. This was complemented by non-  
278 human samples, consisting of 295 pig gut, 191 mouse gut, 124 cat gut and 129 dog gut [47,48]  
279 samples. Further, we included environmental metagenomes from 243 Tara Oceans samples  
280 [49] as well as 189 global topsoil samples [50]. From the non-normalized mOTU abundance  
281 tables, we estimated what percentage of inserts was representative of <sup>U</sup>*B. ceftriaxensis*.

282 For the discovery dataset, samples from the above mentioned dataset were included, with the  
283 addition from twelve antibiotic treated human gut microbial samples [51]. We report for this  
284 focused dataset the 129 samples with their accession and sample IDs in Suppl. Table 8.

285

## 286 **Decoy mapping of reads**

287 In human variant calling, the reference genome (e.g. hs37d5) contains often a so-called decoy  
288 contigs, that cover recurrently (but rarely) assembled regions that are not part of the primary  
289 assembly of the human genome [9]. In order to decrease the rate of false positive read  
290 mappings in the much more complex metagenome with many species that are sometimes  
291 closely related, we used a similar principle. However, instead of adding new reference genomes  
292 we took the inverse approach relying on our metagenomic assembly, which should contain the  
293 best matching references to any reads from a given sample (see section metagenomic  
294 assembly). From this assembly contigs similar to the mapping target were first removed. To do  
295 this, the metagenomic assembly was mapped on the target sequences using blat [52] with the  
296 following parameters: -t=dna -q=dna -minIdentity=95 -minScore=100. These identified matching  
297 contigs were removed from the assembly, and the remaining assembled contigs and the  
298 reference genome were used as new database to map the metagenomic reads against. In our  
299 parameter tests, this procedure increased average mapping scores at variant calls (data not

300 shown) and was therefore used for all SNP calls. The script to create decoy mappings is  
301 available in the MATAFILER pipeline.

302

### 303 **Estimating dominant strain and its genetic variation**

304 First reads from a given sample were mapped against the reference genome, using the above  
305 described decoy mapping procedure. From these, nucleotide variants were called using  
306 freebayes ver. 1.1.0 [53] with the following options -m 30 -q 30 -u -i -C 1 -F 0.1 -k -X --pooled-  
307 continuous --report-monomorphic --min-repeat-entropy 1 --use-best-n-alleles 2 -G 1. Freebayes  
308 is a variant caller that corrects for misalignments using a local realignment among other  
309 features, adapted to SNV calling in highly heterologous cancer genomes. The output vcf file was  
310 filtered with a custom Perl script (vcf2cons.pl, available as part of the MATAFILER pipeline), that  
311 created a consensus sequence from the reference allele, unless the alternative allele  
312 frequencies was  $>0.501$ . The minimum coverage was set to 2 alleles. The 0.501 threshold  
313 serves to avoid introducing a reference bias in the consensus sequence and to filter reads  
314 assignments at a depth of 2, that have a 50% allele frequency.

315 Further, using the 50% allele frequency cutoff circumvents the possibility of several strains  
316 being present in the same host, by only estimating the genome of this strain. If a second strain  
317 would in another time point arise to become the dominant strain, this would be immediately  
318 inferable from the within host diversity and flagged as a strain exchange (which happened in two  
319 hosts for *P. distasonis*).

320

### 321 **Estimating gene copy numbers on assembled genomes**

322 Gene copies on a genome can severely influence SNV calling, as two similar copies of a gene  
323 may accumulate mutations over time. These fixed mutations differing between the two genes  
324 will be called as high confidence SNVs at 50% abundance, thus appearing as majority allele  
325 based on a random process in underlying reads covering the duplicated genes. For this we  
326 developed our own R scripts to use the coverage estimation across the species contigs in a 50  
327 bp window (described above). Coverage across a contig is often not linear, due to growth of  
328 bacteria and a coverage gradient between the origin and terminus of replications [54].

329 Therefore, we first used a robust linear model (function rlm in R) to find a linear fit between  
330 coverage and genomic position. We corrected the genome coverage, using the residual of this  
331 linear model to obtain genome coverage estimates unobstructed by growth rate coverage  
332 dynamics. Within this fit, we identified positions using the arbitrary threshold  $> 1.7$  (corrected)

333 average genome coverage for more than 4 consecutive 50 bp windows, to ensure that spurious  
334 variation in genome coverage was not flagged as SNVs.

335

### 336 **Phylogenies estimated from consensus genomes per sample**

337 The consensus genome per sample (as described above) was first further masked, at the  
338 beginning and end of contigs (200bp) and regions that were estimated to be copy number  
339 variations (see above). Samples were excluded if the amount of undefined genomic positions  
340 exceeded 60% of the total genome length. Further, for the non-synonymous trees, all sites  
341 except those at tRNA, rRNA or 0-fold sites within genes were removed from the alignment. For  
342 the synonymous trees only sites at 4-fold degenerate codon sites were included and the others  
343 removed from the alignment. From these consensus genomes a phylogenetic tree was built  
344 using the “buildTree4.pl” script from the MATAFILER pipeline. Briefly, for all sites we used  
345 gubbins [55] to remove recombining regions and reconstruct a phylogeny as implemented in the  
346 pipeline with the following command line options: “--filter\_percentage 50 --tree\_builder hybrid”.  
347 For the non- and synonymous trees, we used IQ-TREE ver. 1.6.3.a [36] and ModelFinder [37]  
348 (option “-m TEST”) to automatically determine the optimal nucleotide substitution model. To  
349 further validate our mutation rate estimates, we also constructed bootstrapped trees for non-  
350 and synonymous trees, using the option “--fast” to obtain 100 phylogenetic trees that were  
351 subsequently used to determine confidence intervals.

352

### 353 **Statistical analysis**

354 All statistical analysis was conducted in R 3.3.4 unless otherwise noted. Composition matrices  
355 such as species of ARG abundance matrices were normalized by sum, unless otherwise noted.  
356 Ordinations were visualized with non-metric multidimensional scaling (NMDS), as implemented  
357 in the vegan function “metaMDS”, engine “monoMDS”, using between sample Bray-Curtis  
358 distances, and restricted to two dimensions, unless otherwise noted. Ordination via principal  
359 coordinate analysis (PCoA) was calculated via the capscale function, as implemented in vegan.  
360 Differences between univariate variables such as taxonomic abundance or taxa richness were  
361 tested using a non-parametric Wilcoxon rank-sum test, with Benjamini-Hochberg multiple testing  
362 correction. Post-hoc statistical testing for significant differences between all combinations of  
363 three or more groups was conducted only for taxa with  $p < 0.2$  in the Kruskal-Wallis test. For this,  
364 wilcoxon rank-sum tests were calculated for all possible group combinations and corrected for  
365 multiple testing using Benjamini-Hochberg multiple testing correction.

366 Species richness was calculated using rtk [30], rarefying the species abundance matrix to 1200  
367 species counts per sample, unless otherwise noted. Species nestedness and turnover was  
368 calculated using betapart 3.4.4 [56], from the species abundance matrix rarefied to 1200 counts  
369 per sample.

370

### 371 **Species association network**

372 The species association network was built from the normalized species abundance matrix,  
373 excluding species occurring in less than two samples. From this abundance matrix, a  
374 cooccurrence network was constructed using the meinshausen-buhlmann's neighborhood  
375 selection implemented in the R pipeline Spiec-Easi 0.1.4 [57], that relies on sparse  
376 neighborhoods and inverse covariance selection to construct its association network, to avoid  
377 detection of indirect associations. From the inferred network, we used igraph library version  
378 1.2.1 [58] to remove loops and visualize the network. As edge weights, we used spearman  
379 correlations between single species.

380

381 **Data availability.** All metagenomics and metabarcoding sequences have been deposited in the European  
382 Bioinformatics Institute-Sequence Read Archive database, under accession number PRJEB28730.

383

384 **Code availability.** The C++ program to rarefy matrices is available under  
385 <https://github.com/hildebra/Rarefaction>. The pipeline to process metabarcoding sampels is  
386 available under <http://psbweb05.psb.ugent.be/lotus/>. The pipeline to process shotgun  
387 metagenomic samples is available under <https://github.com/hildebra/MATAFILER> .The C++  
388 program to calculate read depth windows is available under <https://github.com/hildebra/rdCover>.

## 389 **Supplemental Text**

### 390 **Genome binning assisted by different sequencing technologies and algorithms**

391 *U*B. *ceftriaxensis* appears to be a common rare member of the human gut microbiota, also found  
392 in other human associated environments. Since all culturing attempts failed (see section  
393 Methods), we had to reconstruct its genome from metagenomes in order improve our  
394 understanding of the species' biology. A subset of metagenomic samples that had a relative  
395 abundance of *U*B. *ceftriaxensis*  $\geq 0.2\%$  were selected and used in all subsequent metagenomic  
396 analysis (132 samples total, Suppl. Table 8), although even in this subset *U*B. *ceftriaxensis* was

397 often just above the metagenomic detection threshold (Suppl. Fig. 1b), demonstrating its  
398 rareness. These 132 metagenomes were *de novo* assembled and a novel gene catalog was  
399 constructed at a 95% gene identity threshold, totaling 5,790,967 non-redundant genes (see  
400 Methods). Through an initial draft genome binning of sample HD.S1.374, four species bins were  
401 recovered (Fig. 1a), consisting of *U*B. *ceftriaxensis*, as well as *Lactobacillus casei*,  
402 *Streptococcus thermophilus* and *Propionibacterium freudenreichii*. The GC vs abundance plots  
403 for days 347, 376, 377, 378 and 380 illustrating these species are show in Suppl. Fig. 17.

404 The assembly quality of the three latter species was low, and those bins were therefore not  
405 used in further analysis (data not shown). Further, we recovered an initial binning of *P*.  
406 *distasonis* for sample HD.S1.377. Since the genomes were instable when rarefying to different  
407 sequencing depths, we used additionally canopy clustering and identified the bins representing  
408 these five species (Nielsen et al. 2014). Since predicted bins often differed by hundreds of  
409 genes (Suppl. Fig. 16c), a custom binning method starting from these two bins (Suppl. Fig.  
410 16a,b, see Methods) was combined with a mate-pair sequencing library generated from sample  
411 HD.S1.380 (1.3% relative *U*B. *ceftriaxensis* abundance). Based on this, a draft genome for both  
412 *U*B. *ceftriaxensis* and *P*. *distasonis* was obtained that were used for further analysis unless  
413 otherwise mentioned. The *U*B. *ceftriaxensis* genome consisted of 8 scaffolds (10 contigs) with a  
414 N50 of 1,925,355 bp and a total length of 2,608,799 bp (see Suppl. Table 3). The genome  
415 contains 2,386 predicted genes, one SSU rRNA, two LSU rRNA and 45 tRNA genes as well as  
416 all 40 essential and conserved marker genes [14]. The 16S rRNA gene predicted in these  
417 contigs classified the species as part of the Firmicutes phylum, as detailed later. Within the set  
418 of NCBI unclassified environmental nucleotide sequences, we found a >99% identical sequence  
419 16S rRNA gene sequence published in 2006, sequenced from fecal human samples [59]. This  
420 independently derived 16S rRNA gene sequence from stool samples gives an initial indication  
421 that the species does exist in other samples and is widely spread.

422  
423 The *U*B. *ceftriaxensis* genome assembly was 94.6% complete based on the MiGA algorithm [33]  
424 containing 105/111 essential marker genes, of which two were potential duplicates (1.8%  
425 contamination). These estimates were reproducible with the CheckM algorithm [32] (94.8%  
426 completeness, contamination rate of 2.45%). The three most closely related genomes (see also  
427 Suppl. Fig. 5) in public databases were MGS (metagenomic species) based on metagenomic  
428 binning approaches [17]. Their binning quality appeared to be worse with an average genome  
429 completeness of 92% and a contamination of 1.04% (CheckM, Suppl. Table 4), which is still a  
430 fairly high quality for metagenomic assembled genomes [60]. Overall, the genome quality of the

431 new species can be considered as “high-quality-draft”, based on criteria put forward in [61], by  
432 far outranking the quality criteria proposed for draft genomes used to describe novel species  
433 (80% completeness, < 5% contamination)[60]. To investigate this further, a reference database  
434 of Firmicutes genomes was built, containing one randomly selected genome from most known  
435 Firmicutes species (total of 243 high quality genomes) referred to in the following as Firmicutes  
436 database. The genome quality of *U*B. *ceftriaxensis* is within the range of these reference  
437 genomes (genome completeness: 98.2± 4%, contamination 1.3±6.4%, mean ± sd for cultured  
438 Firmicutes species, Suppl. Table 4). The assembled genome of *P. distasonis* is of even higher  
439 quality (completeness 99.42%, contamination 0.38%, based on checkM).

440

#### 441 **Functional annotation indicates an anaerobic spore forming fermenter of a wide array of** 442 **carbohydrates**

##### 443 *Metabolism & Genetics*

444 Functional annotation indicates that *U*B. *ceftriaxensis* is anaerobe with fermentative metabolism  
445 and able to utilize a wide range of sugars (detailed listing in Suppl. Table 6, see also Suppl. Fig.  
446 2 for an overview). The carbohydrate-active enzyme (CAZyme) profile of *U*B. *ceftriaxensis* is  
447 dominated by enzymes acting on plant carbohydrates (60 genes), followed by animal  
448 derived/prevalent carbohydrates (24 genes). The low ratio of detectable signal peptides in  
449 CAZymes (28 of 269) indicates the limited capacity of *U*B. *ceftriaxensis* processing dietary  
450 polysaccharides, which requires export of carbohydrate-active enzymes to the external milieu  
451 [58]. The CAZymes translocated by *U*B. *ceftriaxensis* that are related to dietary polysaccharides  
452 include glucosidases (GH13, GH3), fructofuranosidases (GH32) and galactosidases (GH36). *U*B.  
453 *ceftriaxensis* encodes components of ABC transporters for mono and oligosaccharides (103  
454 genes). Their encoding proteins were annotated to participate in the uptake of multiple sugars,  
455 raffinose, stachyose, melibiose, N-acetylglucosamine, arabinogalactan oligomer and ribose. The  
456 preference for mono- and disaccharides is supported by the presence of enzymes for the  
457 metabolism of alpha-L-fucoside, alpha-L-rhamnoside, alpha-trehalose, beta-glucoside,  
458 cellobiose, fructan, galactoside, L-arabinose, maltose, mannosides and mannose, sucrose, and  
459 xylan. Many of these sugars are directed to the glycolysis pathway (Embden-Meyerhof-Parnas),  
460 with exception of xylose and L-arabinose, which are directed to the Pentose Phosphate pathway  
461 (PPP). Genes of the oxidative part of pentose phosphate pathway (conversion of β-D-glucose 6-  
462 phosphate to D-ribulose 5-phosphate) were not detected. On the other hand, the non-oxidative  
463 part is almost complete, lacking only the transaldolase (EC: 2.2.1.2). This is indicative that  
464 fructose 6-phosphate and Glyceraldehyde 3-phosphate, but not glucose 6-phosphate, are the

465 connecting metabolites between glycolysis and PPP. As a central point in fermentative  
466 metabolism, pyruvate can be converted to ethanol and lactate. Pyruvate can also be converted  
467 to acetyl-coenzyme-A (acetyl-CoA), which is branching point for lipid synthesis and synthesis  
468 of TCA components, available for further anaplerotic reactions. This conversion is carried out by  
469 formate C-acetyltransferase, of which reversible reaction requires CoA and produces additionally  
470 formate. Considering the absence of genes encoding for formate hydrogenlyase, that  
471 disproportionates formate to CO<sub>2</sub> and H<sub>2</sub> [62], formate is likely incorporated into the one carbon  
472 pool by formate-tetrahydrofolate ligase or secreted [63]. Acetate can be converted to acetyl-CoA,  
473 via acetyl-CoA synthetase. Acetate consumption and production can be switched depending on  
474 the rate of acetate-producing substrates and acetates in the environment [64]. This could indicate  
475 a mixed acid fermentation.

476 It has been proposed a net of cross-feeding interactions for anaerobic conversion of dietary insoluble  
477 carbohydrates [65]. In this context, *<sup>U</sup>B. ceftriaxensis* would benefit from the extracellular degradation  
478 of polysaccharides by primary degraders and polysaccharide utilizers. In return, the products of  
479 fermentation of *<sup>U</sup>B. ceftriaxensis* would fuel the metabolism of other microbiome members, such as  
480 those that ferment lactate to butyrate [66]. In support of this scenario, 250 of the genes were  
481 involved in transport functions, including 182 genes coding for components of ABC transporters.  
482 In addition to genes encoding for carbohydrate transporters (described in the previous  
483 paragraph), *<sup>U</sup>B. ceftriaxensis* encodes transporter genes involved in the transport of vitamins, e.g.  
484 vitamin B12, minerals, drugs, phosphate and other compounds. Besides drug efflux transporters,  
485 Tec2 encodes 10 additional genes involved in drug resistance, including genes with putative beta-  
486 lactamase domains.

487 *<sup>U</sup>B. ceftriaxensis* encodes two ATPases, a F-type and a V/A-type. Because of the absence  
488 of genes for oxidative phosphorylation proteins, it is likely that the F-type ATPase hydrolyses ATP  
489 to transport protons or sodium [67]. Therefore, both F-type and V/A-type, as V/A-type ATPase  
490 which is a proton or sodium pump, may function in pH homeostasis of the cell [68].

491 Interestingly, the *<sup>U</sup>B. ceftriaxensis* genome encodes proteins similar to structural components of  
492 microcompartments. Bacterial microcompartments are protein-bound organelles that confine  
493 cytotoxic intermediates [69] or enzymatic reactions compromised by oxygen [70]. As known for  
494 *Salmonella typhimurium* [71], it is likely that *<sup>U</sup>B. ceftriaxensis* microcompartments are involved in  
495 the utilization of 1,2 propanediol, which is a product of the fermentation of the sugars rhamnose  
496 and fucose, both naturally occurring in plants and other organism. Although the key enzyme of  
497 1,2 propanediol utilization was not annotated in the genome, i.e. adenosylcobalamin-dependent  
498 diol dehydratase [72], the colocalization and co-orientation of microcompartments genes with

499 genes encoding rhamnose and fucose degrading enzymes supports the use of 1,2 propanediol  
500 in *U. B. ceftriaxensi*. Specifically, co-localized genes include L-fuculose-phosphate aldolase and  
501 rhamnulokinase which are part of enzymatic reactions chains that produce (S)-lactaldehyde, that  
502 is reduced to 1,2 propanediol. This genomic arrangement is similar to what is found in other  
503 bacteria, where bacterial microcompartment (BMC) genes are colocalized with genes encoding  
504 for auxiliary functions, including, transporters and auxiliary genes [66]. Propanol and propionate  
505 are products of 1,2-propanediol utilization in bacteria [71,73].

506 *U. B. ceftriaxensi* is very likely a spore former, as it encodes 40 genes related to several stages of  
507 sporulation, including genes related to the stages II, III, IV and V. The species seems to be  
508 competent, i.e. recombination competent, as part of machinery required for competence (PilB,  
509 PilC, ComEC and ComFC) is present in the genome [74]. Beyond this competence, we find  
510 several genes associated to the defense against foreign DNA, such as restriction type I and 5-  
511 methylcytosine-specific restriction enzyme B.

512

### 513 *Resistances and Pathogenicity*

514 Although the metabolism of *U. B. ceftriaxensi* seems to function anaerobic, it's possible that it can  
515 tolerate some degree of oxygenation, as we can find defense genes against reactive oxygen  
516 species (ROS), like rubrerythrin and thioredoxin. However, this could also be related to defense  
517 against white blood cells, that can use ROS to control bacteria [75].

518 We could assign 359 genes to either the Virulence Factor database (VFDB) [76] or a custom  
519 virulence factor subset from PATRIC [24]. However, most of these assignments do refer to parts  
520 of the bacterial metabolism. Several endotoxins seem to be present (lipopolysaccharide and  
521 lipooligosaccharides), genes involved in biofilm formation, O<sub>2</sub> resistance and genes involved in  
522 antiphagocytosis. Several genes are putatively involved in iron, copper and zinc uptake. Of note  
523 is further Haemolysin and corresponding transporters, required to lyse eukaryotic cells.

524 Comparing to the expected distribution given other Firmicutes bacteria, we observed a n.s.  
525 enrichment in the putative virulence categories Autophagy, Phosphate uptake, Escape from  
526 phagosome and Chaperone (data not shown).

527

### 528 **Resistance of *U. B. ceftriaxensis* to beta-lactam antibiotics**

529 *U. B. ceftriaxensis* encodes genes related to drug resistance, such as genes coding for mate  
530 efflux family proteins, putative beta-lactamases and phosphinothricin acetyltransferase, which  
531 confer resistance to herbicides in *Streptomyces hygrosopicus* [77].



532 We further tested the two putative beta-lactamases experimentally, that had a low similarity to  
533 known beta-lactamases (33% and 31% AA identity, respectively to NCBI NR hypothetical beta-  
534 lactamases). Both candidate genes seem to be part of the core genome (peg.343, peg.1661,  
535 Suppl. Table 6), as they were assembled into the largest contig.

536 To determine the beta-lactamase activity of these genes, they were expressed in *E. coli* and  
537 beta-lactamase activity was tested on nitrocefin disks (Sigma). The disks changed color when  
538 they had contact with the CTX-M 15 beta-lactamase expressing colony used as positive control  
539 indicating strong beta-lactamase activity. A weaker, but clearly positive reaction was observed  
540 for *U*B. *ceftriaxensis* fig|6666666.214148.peg.343 (Suppl. Table 6). *E. coli* expressing *U*B.  
541 *ceftriaxensis* fig|6666666.214148.peg.2120 revealed no such activity (data not shown).  
542 However, while the CTX-M 15 beta-lactamase led to ampicillin and ceftriaxone resistance in *E.*  
543 *coli*, none of the two potential *U*B. *ceftriaxensis* beta-lactamases was functional enough to  
544 support growth in presence of ampicillin or ceftriaxone.

545

#### 546 **Survival of *U*B. *ceftriaxensis* upon antibiotics treatment**

547 Ceftriaxone disrupts the peptidoglycan synthesis in the bacterial cell wall, inhibiting essential  
548 penicillin binding proteins (pbp's). Bacterial resistance to beta-lactam antibiotics can be  
549 conferred either through resistant forms of pbp's, beta lactamases or through spore formation  
550 that survive the antibiotic treatment. *U*B. *ceftriaxensis* had two putative beta lactamases, but  
551 both showed no or insufficient activity against ceftriaxone experimentally (see above).

552 Alternatively, *U*B. *ceftriaxensis* might survive as dormant persistor cells or spores, such as *C.*  
553 *difficile* [78], as supported by high abundance of genes related to spore formation.

554 However, spore formation, that is persistence without growth, also seems unlikely as sole  
555 explanation, since *U*B. *ceftriaxensis* absolute cell numbers were >1,100x increased compared to  
556 baseline levels on the first day after antibiotic treatment. One would still expect a remaining  
557 ceftriaxone concentration of 12-25% in the gut at this time point (see Methods). Thus, a direct  
558 cephalosporine resistance of *U*B. *ceftriaxensis* seems likely, and this resistance is in gram  
559 positive bacteria often conferred through resistant pbp' that are inherently resistance to beta-  
560 lactams [79]. The *U*B. *ceftriaxensis* genome encodes two class 5/6 pbp's, a class that has been  
561 linked to confer cephalosporin resistance in *Enterococci* and *Listeria* [80,81]. Before, it has  
562 been shown to confer specifically ceftriaxone resistance [82]. While there are no molecular tools  
563 to test the resistance of this pbp by transfer of the gene into another species, it seems most  
564 plausible that *U*B. *ceftriaxensis* is resistant to ceftriaxone and that this resistance might be  
565 intrinsically conferred through a combination of resistant pbp's and surviving as spores.

566

### 567 **Detection of *<sup>U</sup>B. ceftriaxensis* in public samples**

568 To investigate the prevalence of *<sup>U</sup>B. ceftriaxensis* in diverse environments we screened 3,692  
569 public metagenomic datasets from human associated and other environments (see Methods).  
570 The overall prevalence of *<sup>U</sup>B. ceftriaxensis* was 20.1% over all samples (Suppl. Table 7), being  
571 most prevalent in gut samples from 3 continents (30.1% of 1,801) but entirely absent in ocean  
572 samples (n=243). Exploring different human body sites, it is detectable in 8 out of 18 non-gut  
573 sites. However, in non-gut samples detection rate was spurious (2.6% of 952 non-gut human  
574 associated samples). We further analyzed 1,163 metagenomes balanced among animal guts  
575 (mouse, pig, cat and dog), as well as ocean and soil, but did not detect this species in any of  
576 these.

577

### 578 ***Density of bacterial cells in stool samples***

579 Cell numbers are relatively stable within and between patients, ranging from 0.11 - 1.03 e12  
580 cells/ml stool. This seems realistic, although slightly higher than the average reported in a  
581 metanalysis of several studies (0.92e11 cells/ml stool, [83]). Since our cell counts were  
582 restricted to 19 samples total, we had no overlapping time point between pre-antibiotic *<sup>U</sup>B.*  
583 *ceftriaxensis* detection and cell counts. To still infer absolute ratio change in *<sup>U</sup>B. ceftriaxensis*  
584 bloom at day 374 compared to previous samples, we used the relative abundance of the deeply  
585 sequenced day 7 and the mean abundance of all samples with cell counts before day 374,  
586 namely day 0 and 60 to approximate the absolute abundance of *<sup>U</sup>B. ceftriaxensis* before day  
587 374.

588

### 589 ***P. distasonis* patient specific association**

590 *P. distasonis* was associated to an antibiotic induced monodominance and therefore we wanted  
591 to investigate if *P. distasonis* was replaced by another strain of the same species during the  
592 antibiotic treatment. This analysis showed that *P. distasonis* remained stable over time in  
593 subject HD.S1, but also most other subjects in the discovery dataset, with the exception of two  
594 subjects that showed a clear change of *P. distasonis* genotypes (Suppl. Fig. 10a). Furthermore,  
595 we found that *P. distasonis* strains were nearly identical strains (<100 nt differences genome

596 wide) in subjects (HD.S1 + HD.S4, HD.S8 + HD.S9). We note that HD.S1+HD.S4, as well as  
597 HD.S8+HD.S9 are each family members and a within family strain transfer seems to be the  
598 most likely scenario explaining this similarity (Suppl. Fig. 10a).  
599 Between patients, we found an average inter-sample evolutionary distance of  $99.1 \pm 0.5\%$   
600 (corresponding to 45,840 nt average genomewide differences, Suppl. Fig. 10b). This indicates  
601 that this species could be represented by a single ecotype within the 31 subjects analyzed here.  
602

### 603 **Functional changes upon antibiotics treatment**

604 We hypothesized that functional potential of the microbiome should be changed after the  
605 antibiotic treatment. Indeed, putative pathogenicity genes (PPGs) were increased in the first and  
606 decreased in the second stage, relative to states after >30 days of treatment, while for antibiotic  
607 resistance genes (ARG) the opposite was true (Fig. 4c,  $p < 0.05$ , Suppl. Table 12): the second  
608 stage was significantly enriched in ARGs, specifically beta-lactamases (Suppl. Table 13), that  
609 confer a resistance to both antibiotics used. PPGs were enriched in the first stage. In the  
610 second stage overall CAZy potential was increased ( $p = 0.0028$ ), while it was decreased in the  
611 first stage (Fig. 4c). CAZymes categories specific to food derived (plants, animals)  
612 carbohydrates were increased during both second stages, especially after Cefuroxime treatment  
613 (Suppl. Fig. 13a), in contrast to decreased CAZymes specific to microbial substrates (bacterial,  
614 fungal) (Suppl. Fig. 13b). This could be interpreted as predatory species being decreased in the  
615 first stage of community rebuilding.

### 616 **Monodominance occurrence in the human microbiome**

617 While monodominance can be considered an unnatural state of the healthy human microbiome  
618 by our current knowledge, the occurrence of monodominance could be higher than currently  
619 published studies would imply. Conversely we argue, that monodominance states might have  
620 been overlooked so far, as (i) temporal sampling is usually much sparser than our study; (ii) 16S  
621 sequencing might underestimate the true abundance of monodominant species due to PCR  
622 biases and 16S copy number variations [84,85]; (iii) only few microbial studies have included  
623 patients treated with intravenous antibiotics [86] [87]; (iv) samples might have been discarded  
624 from analysis due to “contamination” with a single unknown organism, which standard  
625 metagenomics methods will often fail to detect [40,88] and (v) such dramatic community  
626 restructuring can remain unnoticed as subject HD.S1 did not report any phenotypic effects  
627 during monodominant phases.

628

629 **Proposed changes to firmicutes taxonomy and placement of <sup>U</sup>*B. ceftriaxensis*-**  
630 **supporting information**

631 In the high resolution phylogeny for Firmicutes taxa, most families appear monophyletic, but a  
632 few notable deviations can be observed in the phylogeny based on 40 marker genes (Fig. 3) or  
633 in the 16S based phylogeny (Suppl. Fig. 6). For example, *Eubacterium rectale* is clearly in the  
634 same clade as Lachnospiraceae and not Eubacteriaceae as proposed in the NCBI taxonomy  
635 and therefore recently proposed to be reclassified to family Lachnospiraceae, based on  
636 genomic as well as cellular features [89], as also in our phylogeny. *Heliobacterium*  
637 *modesticaldum* seems to either be part of Peptococcaceae, several species currently classified  
638 as Peptococcaceae are a new family, based on both 40 MG and 16S phylogeny. We have  
639 proposed several suggested changes to the Firmicutes taxonomy in Suppl. Table 10. Indeed, a  
640 recent work describing most bacterial genomes available publicly proposed very similar  
641 changes [90]. Of note are Thermoacaerobacteraceae and Peptococcaceae, that appear  
642 intermixed based on the 40 MGs phylogeny (Fig. 3), though this is only to a lesser degree  
643 supported by the 16S rRNA gene phylogeny.

644 The family Ruminococcaceae is especially interesting in our analysis, as <sup>U</sup>*B. ceftriaxensis* could  
645 be part of this clade. Notably, Ruminococcaceae is paraphyletic based on our analysis, and we  
646 propose to split this family into three families: there is a distinct “core” group including genera  
647 such as *Faecalibacterium* and the type genus *Ruminococcus*, that are monophyletic in all  
648 phylogenetic analysis. However, other Ruminococcaceae can be separated into two clusters:  
649 *Clostridium cellulyticum*, *Clostridium josui*, *Pseudobacteroides cellulosolvens*, *Ruminiclostridium*  
650 *thermocellum* and *Acidothermus cellulyticus* form an outgroup that is well supported by  
651 bootstrap values and always separated from the core Ruminococcaceae clade, by either the  
652 family Eubacteriaceae (Fig. 3) or the family Oscillospiraceae (Suppl. Fig. 6). Intriguingly, *R.*  
653 *thermocellum* was recently renamed from *Clostridium* to genus *Ruminiclostridium*, with the  
654 authors already noting its uncertain phylogenetic position in family Ruminococcaceae [91]. The  
655 third Ruminococcaceae clade consists of *Mageeibacillus indolicus*, recently isolated from  
656 human vaginal samples [92], *Ruminococcaceae bacterium* AB4001 and *Ruminococcaceae*  
657 *bacterium* AE2021, both part of the Hungate 1000 project<sup>2</sup> culturing cow rumen bacteria. To  
658 resolve the observed polyphyletic branching of Ruminococcaceae, we propose that the two  
659 discussed clades should form two new taxonomic families by themselves (Suppl. Table 10),

---

<sup>2</sup> <http://www.rmgnetwork.org/hungate1000.html>

660 named **Erisaceae** fam. nov. and **Discordiaceae**, fam. nov., named after the greek and latin  
661 goddess of discord, Eris and Discordia. It is of note that AB4001 and AE2021 fall only within the  
662 Discordiaceae family in the 40 MG tree, while their 16S seems to place them within  
663 Lachnospiraceae (Suppl. Fig. 6).

664 This grouping is further supported by distance-based analysis: In our phylogenetic analysis we  
665 argue that the polyphyletic Ruminococcaceae family represents multiple clades, based on  
666 phylogenetic maximum likelihood trees (16S, marker genes). We propose to divide  
667 Ruminococcaceae into different families with <sup>U</sup>*B. Ceftriaxensis* placed as a new separate family.

668  
669 The proposed phylogenetic structure was further tested based on the similarity (percent identity)  
670 of the 40 marker genes nucleotide sequences, amino acid sequences and 16S sequences. As a  
671 reference, the minimum and the median percent identities from genomes of our Firmicutes  
672 reference database were calculated on different taxonomic levels, restricted to species that  
673 represent monophyletic clades in the amino acid tree. We compared the genomic similarity of  
674 Ruminococcaceae species to each other and to within family genetic similarities of other  
675 Firmicutes families (Suppl. Table. 9). First, we note that the median amino acid as well as 16S  
676 nucleotide similarity of all members of the originally annotated Ruminococcaceae family is very  
677 low (60.7% and 88.8%) compared to the average among all other Firmicutes families (70.9%  
678 and 91.6%), actually even lower or comparable to the average within class level (62.1% and  
679 88.2%) strongly indicating that species currently annotated as Ruminococcaceae should be  
680 represented by multiple families, or even classes. This agrees with our phylogenetic analysis  
681 (see above), where we identified three distinct clusters of Ruminococcaceae: the core cluster  
682 composed of seven species and *Ruminococcus* sp., the three species of Discordiaceae fam.  
683 nov. and Erisaceae fam. nov.. While the Erisaceae family clearly represents one family (71.7%  
684 median amino acid identity), the members of the Ruminococcaceae main cluster and the  
685 Discordiaceae cluster are both less similar (65.4% and 63.3% median amino acid identity,  
686 respectively), thus potentially still representing more than one family, given 70.9% being on  
687 average the median AA similarity typically found among members of Firmicutes families (Suppl.  
688 Table 9, Suppl. Fig. 5).

689  
690 Further, our analysis strongly indicates that <sup>U</sup>*B. ceftriaxensis* represents a new separate family  
691 including three MGS, binned genomes from gut metagenomic samples (Nielsen et al. 2014).  
692 This clade is in our analysis distinct from Ruminococcaceae, Discordiaceae and Erisaceae,  
693 given median genetic similarities (Suppl. Fig. 5) and phylogeny (Fig. 3). Instead family

694 Catabacteriaceae is the most similar family, represented by type species *Catabacter*  
695 *hongkongensis*.  
696

## 697 Bibliography (Methods & Supplement)

- 698 1 Voigt AY, Costea PI, Kultima JR, *et al.* Temporal and technical variability of human gut  
699 metagenomes. *Genome Biol* 2015;**16**:73. doi:10.1186/s13059-015-0639-8  
700 2 Plugge CM. Anoxic media design, preparation, and considerations. *Methods Enzymol*  
701 2005;**397**:3–16. doi:10.1016/S0076-6879(05)97001-8  
702 3 Yilmaz P, Parfrey LW, Yarza P, *et al.* The SILVA and ‘All-species Living Tree Project  
703 (LTP)’ taxonomic frameworks. *Nucleic Acids Res* 2014;**42**:D643-8.  
704 doi:10.1093/nar/gkt1209  
705 4 Schramm A, Fuchs BM, Nielsen JL, *et al.* Fluorescence in situ hybridization of 16S rRNA  
706 gene clones (Clone-FISH) for probe validation and screening of clone libraries. *Environ*  
707 *Microbiol* 2002;**4**:713–20. <http://www.ncbi.nlm.nih.gov/pubmed/12460279>  
708 5 Puente-Sanchez F, Aguirre J, Parro V, *et al.* A novel conceptual approach to read-filtering  
709 in high-throughput amplicon sequencing studies. *Nucleic Acids Res* 2015;:gkv1113-  
710 doi:10.1093/nar/gkv1113  
711 6 Hildebrand F, Tadeo R, Voigt A, *et al.* LotuS: an efficient and user-friendly OTU  
712 processing pipeline. *Microbiome* 2014;**2**:30. doi:10.1186/2049-2618-2-30  
713 7 Wood DE, Salzberg SL. Kraken: ultrafast metagenomic sequence classification using  
714 exact alignments. *Genome Biol* 2014;**15**:R46. doi:10.1186/gb-2014-15-3-r46  
715 8 Rasmussen S, Allentoft ME, Nielsen K, *et al.* Early Divergent Strains of *Yersinia pestis* in  
716 Eurasia 5,000 Years Ago. *Cell* 2015;**163**:571–82. doi:10.1016/j.cell.2015.10.009  
717 9 Li H. Toward better understanding of artifacts in variant calling from high-coverage  
718 samples. *Bioinformatics* 2014;**30**:2843–51. doi:10.1093/bioinformatics/btu356  
719 10 Bankevich A, Nurk S, Antipov D, *et al.* SPAdes: a new genome assembly algorithm and  
720 its applications to single-cell sequencing. *J Comput Biol* 2012;**19**:455–77.  
721 doi:10.1089/cmb.2012.0021  
722 11 Hyatt D, Chen G-L, Locascio PF, *et al.* Prodigal: prokaryotic gene recognition and  
723 translation initiation site identification. *BMC Bioinformatics* 2010;**11**:119.  
724 doi:10.1186/1471-2105-11-119  
725 12 Fu L, Niu B, Zhu Z, *et al.* CD-HIT: Accelerated for clustering the next-generation  
726 sequencing data. *Bioinformatics* 2012;**28**:3150–2. doi:10.1093/bioinformatics/bts565  
727 13 Langmead B, Salzberg SL. Fast gapped-read alignment with Bowtie 2. *Nat Methods*  
728 2012;**9**:357–9. doi:10.1038/nmeth.1923  
729 14 Mende DR, Sunagawa S, Zeller G, *et al.* Accurate and universal delineation of  
730 prokaryotic species. *Nat Methods* 2013;**10**:881–4. doi:10.1038/nmeth.2575  
731 15 Hauswedell H, Singer J, Reinert K. Lambda: the local aligner for massive biological data.  
732 *Bioinformatics* 2014;**30**:i349–55. doi:10.1093/bioinformatics/btu439  
733 16 Mende DR, Letunic I, Huerta-Cepas J, *et al.* proGenomes: a resource for consistent  
734 functional and taxonomic annotations of prokaryotic genomes. *Nucleic Acids Res*  
735 2016;**45**:gkw989. doi:10.1093/nar/gkw989  
736 17 Nielsen HB, Almeida M, Juncker AS, *et al.* Identification and assembly of genomes and  
737 genetic elements in complex metagenomic samples without using reference genomes.  
738 *Nat Biotechnol* 2014;**32**:822–8. doi:10.1038/nbt.2939  
739 18 Li H, Handsaker B, Wysoker A, *et al.* The Sequence Alignment/Map format and

740 SAMtools. *Bioinformatics* 2009;**25**:2078–9. doi:10.1093/bioinformatics/btp352  
741 19 Buchfink B, Xie C, Huson DH. Fast and sensitive protein alignment using DIAMOND. *Nat*  
742 *Methods* Published Online First: 17 November 2014. doi:10.1038/nmeth.3176  
743 20 Cantarel BL, Coutinho PM, Rancurel C, *et al.* The Carbohydrate-Active EnZymes  
744 database (CAZY): an expert resource for Glycogenomics. *Nucleic Acids Res*  
745 2009;**37**:D233–8. doi:10.1093/nar/gkn663  
746 21 Kanehisa M, Goto S. KEGG: kyoto encyclopedia of genes and genomes. *Nucleic Acids*  
747 *Res* 2000;**28**:27–30.  
748 22 McArthur AG, Waglechner N, Nizam F, *et al.* The comprehensive antibiotic resistance  
749 database. *Antimicrob Agents Chemother* 2013;**57**:3348–57. doi:10.1128/AAC.00419-13  
750 23 Huerta-Cepas J, Szklarczyk D, Forslund K, *et al.* eggNOG 4.5: a hierarchical orthology  
751 framework with improved functional annotations for eukaryotic, prokaryotic and viral  
752 sequences. *Nucleic Acids Res* 2016;**44**:D286-93. doi:10.1093/nar/gkv1248  
753 24 Wattam AR, Davis JJ, Assaf R, *et al.* Improvements to PATRIC, the all-bacterial  
754 Bioinformatics Database and Analysis Resource Center. *Nucleic Acids Res*  
755 2017;**45**:D535–42. doi:10.1093/nar/gkw1017  
756 25 Cantarel BL, Lombard V, Henrissat B. Complex Carbohydrate Utilization by the Healthy  
757 Human Microbiome. *PLoS One* 2012;**7**:e28742. doi:10.1371/journal.pone.0028742  
758 26 Cardenas E, Kranabetter JM, Hope G, *et al.* Forest harvesting reduces the soil  
759 metagenomic potential for biomass decomposition. *ISME J* 2015;**9**:2465–76.  
760 doi:10.1038/ismej.2015.57  
761 27 Forslund K, Hildebrand F, Nielsen T, *et al.* Disentangling type 2 diabetes and metformin  
762 treatment signatures in the human gut microbiota. *Nature* 2015;**528**:262–6.  
763 doi:10.1038/nature15766  
764 28 Vieira-Silva S, Rocha EPC. The systemic imprint of growth and its uses in ecological  
765 (meta)genomics. *PLoS Genet* 2010;**6**:e1000808. doi:10.1371/journal.pgen.1000808  
766 29 Wu Y-W, Tang Y-H, Tringe SG, *et al.* MaxBin: an automated binning method to recover  
767 individual genomes from metagenomes using an expectation-maximization algorithm.  
768 *Microbiome* 2014;**2**:26. doi:10.1186/2049-2618-2-26  
769 30 Saary P, Forslund K, Bork P, *et al.* RTK: efficient rarefaction analysis of large datasets.  
770 *Bioinformatics* 2017;:1–2. doi:10.1093/bioinformatics/btx206  
771 31 Sahlin K, Vezzi F, Nystedt B, *et al.* BESST - Efficient scaffolding of large fragmented  
772 assemblies. *BMC Bioinformatics* 2014;**15**:281. doi:10.1186/1471-2105-15-281  
773 32 Parks DH, Imelfort M, Skennerton CT, *et al.* CheckM: assessing the quality of microbial  
774 genomes recovered from. *Cold Spring Harb Lab Press Method* 2015;**1**:1–31.  
775 doi:10.1101/gr.186072.114  
776 33 Rodriguez-R LM, Gunturu S, Harvey WT, *et al.* The Microbial Genomes Atlas (MiGA)  
777 webserver: taxonomic and gene diversity analysis of Archaea and Bacteria at the whole  
778 genome level. *Nucleic Acids Res* 2018;**46**:W282–8. doi:10.1093/nar/gky467  
779 34 Lagesen K, Hallin P, Rødland EA, *et al.* RNAmmer: consistent and rapid annotation of  
780 ribosomal RNA genes. *Nucleic Acids Res* 2007;**35**:3100–8. doi:10.1093/nar/gkm160  
781 35 Sievers F, Wilm A, Dineen D, *et al.* Fast, scalable generation of high-quality protein  
782 multiple sequence alignments using Clustal Omega. *Mol Syst Biol* 2011;**7**:539.  
783 doi:10.1038/msb.2011.75  
784 36 Nguyen L-T, Schmidt HA, von Haeseler A, *et al.* IQ-TREE: A Fast and Effective  
785 Stochastic Algorithm for Estimating Maximum-Likelihood Phylogenies. *Mol Biol Evol*  
786 2015;**32**:268–74. doi:10.1093/molbev/msu300  
787 37 Kalyaanamoorthy S, Minh BQ, Wong TKF, *et al.* ModelFinder: fast model selection for  
788 accurate phylogenetic estimates. *Nat Methods* 2017;**14**:587–9. doi:10.1038/nmeth.4285  
789 38 Lemoine F, Domelevo Entfellner J-B, Wilkinson E, *et al.* Renewing Felsenstein's  
790 phylogenetic bootstrap in the era of big data. *Nature* 2018;**556**:452–6.

791 doi:10.1038/s41586-018-0043-0  
792 39 Letunic I, Bork P. Interactive tree of life (iTOL) v3: an online tool for the display and  
793 annotation of phylogenetic and other trees. *Nucleic Acids Res* 2016;**44**:W242–5.  
794 doi:10.1093/nar/gkw290  
795 40 Sunagawa S, Mende DR, Zeller G, *et al.* Metagenomic species profiling using universal  
796 phylogenetic marker genes. *Nat Methods* 2013;**10**:1196–9. doi:10.1038/nmeth.2693  
797 41 Costea PI, Coelho LP, Sunagawa S, *et al.* Subspecies in the global human gut  
798 microbiome. *Mol Syst Biol* 2017;**13**:960. doi:10.15252/msb.20177589  
799 42 Feng Q, Liang S, Jia H, *et al.* Gut microbiome development along the colorectal  
800 adenoma-carcinoma sequence. *Nat Commun* 2015;**6**. doi:10.1038/ncomms7528  
801 43 Qin J, Li Y, Cai Z, *et al.* A metagenome-wide association study of gut microbiota in type 2  
802 diabetes. *Nature* 2012;**490**:55–60. doi:10.1038/nature11450  
803 44 Huttenhower C, Gevers D, Knight R, *et al.* Structure, function and diversity of the healthy  
804 human microbiome. *Nature*. 2012;**486**:207–14. doi:10.1038/nature11234  
805 45 Zeller G, Tap J, Voigt AY, *et al.* Potential of fecal microbiota for early-stage detection of  
806 colorectal cancer. *Mol Syst Biol*  
807 2014;**10**:766.<http://www.pubmedcentral.nih.gov/articlerender.fcgi?artid=4299606&tool=pmcentrez&rendertype=abstract> (accessed 30 Nov 2014).  
808  
809 46 Karlsson FH, Tremaroli V, Nookaew I, *et al.* Gut metagenome in European women with  
810 normal, impaired and diabetic glucose control. *Nature* 2013;**498**:99–103.  
811 doi:10.1038/nature12198  
812 47 Coelho LP, Kultima JR, Costea PI, *et al.* Similarity of the dog and human gut  
813 microbiomes in gene content and response to diet. *Microbiome* 2018;**6**:72.  
814 doi:10.1186/s40168-018-0450-3  
815 48 Deusch O, O'Flynn C, Colyer A, *et al.* A longitudinal study of the feline faecal microbiome  
816 identifies changes into early adulthood irrespective of sexual development. *PLoS One*  
817 2015;**10**:1–21. doi:10.1371/journal.pone.0144881  
818 49 Sunagawa S, Coelho LP, Chaffron S, *et al.* Ocean plankton. Structure and function of the  
819 global ocean microbiome. *Science* 2015;**348**:1261359. doi:10.1126/science.1261359  
820 50 Bahram M, Hildebrand F, Forslund SK, *et al.* Structure and function of the global topsoil  
821 microbiome. *Nature* 2018;**560**:233–7. doi:10.1038/s41586-018-0386-6  
822 51 Willmann M, El-Hadidi M, Huson DH, *et al.* Antibiotic Selection Pressure Determination  
823 through Sequence-Based Metagenomics. *Antimicrob Agents Chemother* 2015;**59**:7335–  
824 45. doi:10.1128/AAC.01504-15  
825 52 Kent WJ. BLAT--the BLAST-like alignment tool. *Genome Res* 2002;**12**:656–64.  
826 doi:10.1101/gr.229202  
827 53 Garrison E, Marth G. Haplotype-based variant detection from short-read sequencing.  
828 2012;:9.<http://arxiv.org/abs/1207.3907> (accessed 11 Jul 2014).  
829 54 Korem T, Zeevi D, Suez J, *et al.* Growth dynamics of gut microbiota in health and disease  
830 inferred from single metagenomic samples. *Science (80- )* 2015;**349**:1101–6.  
831 doi:10.1126/science.aac4812  
832 55 Croucher NJ, Page AJ, Connor TR, *et al.* Rapid phylogenetic analysis of large samples of  
833 recombinant bacterial whole genome sequences using Gubbins. *Nucleic Acids Res*  
834 2015;**43**:e15–e15. doi:10.1093/nar/gku1196  
835 56 Baselga A, Orme CDL. Betapart: An R package for the study of beta diversity. *Methods*  
836 *Ecol Evol* 2012;**3**:808–12. doi:10.1111/j.2041-210X.2012.00224.x  
837 57 Kurtz ZD, Müller CL, Miraldi ER, *et al.* Sparse and Compositionally Robust Inference of  
838 Microbial Ecological Networks. *PLOS Comput Biol* 2015;**11**:e1004226.  
839 doi:10.1371/journal.pcbi.1004226  
840 58 Csardi G, Nepusz T. The igraph software package for complex network research.  
841 *InterJournal, Complex Syst* 2006;**1695**:1–9.



842 59 Ley RE, Turnbaugh PJ, Klein S, *et al.* Human gut microbes associated with obesity.  
843 *Nature* 2006;**444**:1022–3. doi:10.1038/nature4441022a

844 60 Konstantinidis KT, Rosselló-Móra R, Amann R. Uncultivated microbes in need of their  
845 own taxonomy. *ISME J* 2017;**11**:2399–406. doi:10.1038/ismej.2017.113

846 61 Bowers RM, Kyrpides NC, Stepanauskas R, *et al.* Minimum information about a single  
847 amplified genome (MISAG) and a metagenome-assembled genome (MIMAG) of bacteria  
848 and archaea. *Nat Biotechnol* 2017;**in press**:725–31. doi:10.1038/nbt.3893

849 62 Sawers G. The hydrogenases and formate dehydrogenases of *Escherichia coli*. *Antonie*  
850 *Van Leeuwenhoek* 1994;**66**:57–88. <http://www.ncbi.nlm.nih.gov/pubmed/7747941>

851 63 Leonhartsberger S, Korsá I, Böck A. The molecular biology of formate metabolism in  
852 enterobacteria. *J Mol Microbiol Biotechnol* 2002;**4**:269–  
853 76. <http://www.ncbi.nlm.nih.gov/pubmed/11931558>

854 64 Wolfe AJ. The acetate switch. *Microbiol Mol Biol Rev* 2005;**69**:12–50.  
855 doi:10.1128/MMBR.69.1.12-50.2005

856 65 Flint HJ, Duncan SH, Scott KP, *et al.* Interactions and competition within the microbial  
857 community of the human colon: links between diet and health. *Environ Microbiol*  
858 2007;**9**:1101–11. doi:10.1111/j.1462-2920.2007.01281.x

859 66 Axen SD, Erbilgin O, Kerfeld CA. A Taxonomy of Bacterial Microcompartment Loci  
860 Constructed by a Novel Scoring Method. *PLoS Comput Biol* 2014;**10**:e1003898.  
861 doi:10.1371/journal.pcbi.1003898

862 67 Ferguson SA, Keis S, Cook GM. Biochemical and Molecular Characterization of a Na<sup>+</sup>-  
863 Translocating F<sub>1</sub>F<sub>o</sub>-ATPase from the Thermoalkaliphilic Bacterium *Clostridium*  
864 *paradoxum*. *J Bacteriol* 2006;**188**:5045–54. doi:10.1128/JB.00128-06

865 68 Lolkema JS, Chaban Y, Boekema EJ. No Title. *J Bioenerg Biomembr* 2003;**35**:323–35.  
866 doi:10.1023/A:1025776831494

867 69 Sampson EM, Bobik TA. Microcompartments for B<sub>12</sub>-Dependent 1,2-Propanediol  
868 Degradation Provide Protection from DNA and Cellular Damage by a Reactive Metabolic  
869 Intermediate. *J Bacteriol* 2008;**190**:2966–71. doi:10.1128/JB.01925-07

870 70 Kerfeld CA, Aussignargues C, Zarzycki J, *et al.* Bacterial microcompartments. *Nat Rev*  
871 *Microbiol* 2018;**16**:277–90. doi:10.1038/nrmicro.2018.10

872 71 Obradors N, Badía J, Baldomà L, *et al.* Anaerobic metabolism of the L-rhamnose  
873 fermentation product 1,2-propanediol in *Salmonella typhimurium*. *J Bacteriol*  
874 1988;**170**:2159–62. <http://www.ncbi.nlm.nih.gov/pubmed/3283105>

875 72 Bobik TA, Havemann GD, Busch RJ, *et al.* The propanediol utilization (*pdu*) operon of  
876 *Salmonella enterica* serovar Typhimurium LT2 includes genes necessary for formation of  
877 polyhedral organelles involved in coenzyme B<sub>12</sub>-dependent 1, 2-propanediol  
878 degradation. *J Bacteriol* 1999;**181**:5967–  
879 75. <http://www.ncbi.nlm.nih.gov/pubmed/10498708>

880 73 Petit E, LaTouf WG, Coppi M V., *et al.* Involvement of a Bacterial Microcompartment in  
881 the Metabolism of Fucose and Rhamnose by *Clostridium phytofermentans*. *PLoS One*  
882 2013;**8**:e54337. doi:10.1371/journal.pone.0054337

883 74 Seitz P, Blokesch M. DNA-uptake machinery of naturally competent *Vibrio cholerae*. *Proc*  
884 *Natl Acad Sci* 2013;**110**:17987–92. doi:10.1073/pnas.1315647110

885 75 Sommer F, Moltzau Anderson J, Bharti R, *et al.* The resilience of the intestinal microbiota  
886 influences health and disease. *Nat Publ Gr* Published Online First: 2017.  
887 doi:10.1038/nrmicro.2017.58

888 76 Chen L, Zheng D, Liu B, *et al.* VFDB 2016: hierarchical and refined dataset for big data  
889 analysis—10 years on. *Nucleic Acids Res* 2016;**44**:D694–7. doi:10.1093/nar/gkv1239

890 77 Thompson CJ, Movva NR, Tizard R, *et al.* Characterization of the herbicide-resistance  
891 gene *bar* from *Streptomyces hygrosopicus*. *EMBO J* 1987;**6**:2519–  
892 23. <http://www.ncbi.nlm.nih.gov/pubmed/16453790>

893 78 Lawley TD, Clare S, Walker AW, *et al.* Antibiotic treatment of *Clostridium difficile* carrier  
894 mice triggers a supershedder state, spore-mediated transmission, and severe disease in  
895 immunocompromised hosts. *Infect Immun* 2009;**77**:3661–9. doi:10.1128/IAI.00558-09  
896 79 Rice LB. Mechanisms of resistance and clinical relevance of resistance to  $\beta$ -lactams,  
897 glycopeptides, and fluoroquinolones. *Mayo Clin Proc* 2012;**87**:198–208.  
898 doi:10.1016/j.mayocp.2011.12.003  
899 80 Krawczyk-Balska A, Markiewicz Z. The intrinsic cephalosporin resistome of *Listeria*  
900 *monocytogenes* in the context of stress response, gene regulation, pathogenesis and  
901 therapeutics. *J Appl Microbiol* 2016;**120**:251–65. doi:10.1111/jam.12989  
902 81 Collins J, Robinson C, Danhof H, *et al.* Dietary trehalose enhances virulence of epidemic  
903 *Clostridium difficile*. *Nature* 2018;**553**:291–4. doi:10.1038/nature25178  
904 82 Arbeloa A, Segal H, Hugonnet J-E, *et al.* Role of class A penicillin-binding proteins in  
905 PBP5-mediated beta-lactam resistance in *Enterococcus faecalis*. *J Bacteriol*  
906 2004;**186**:1221–8. doi:10.1128/JB.186.5.1221  
907 83 Sender R, Fuchs S, Milo R. Revised Estimates for the Number of Human and Bacteria  
908 Cells in the Body. *PLoS Biol* 2016;**14**:e1002533. doi:10.1371/journal.pbio.1002533  
909 84 Bahram M, Anslan S, Hildebrand F, *et al.* Newly designed 16S rRNA metabarcoding  
910 primers amplify diverse and novel archaeal taxa from the environment. *Environ Microbiol*  
911 *Rep* 2018;**5**. doi:10.1111/1758-2229.12684  
912 85 Tedersoo L, Anslan S, Bahram M, *et al.* Shotgun metagenomes and multiple primer pair-  
913 barcode combinations of amplicons reveal biases in metabarcoding analyses of fungi.  
914 *MycKeys* 2015;**10**:1–43. doi:10.3897/mycokeys.10.4852  
915 86 Surawicz CM. Antibiotic-associated diarrhea and pseudomembranous colitis: Are they  
916 less common with poorly absorbed antimicrobials? *Chemotherapy* 2005;**51**:81–9.  
917 doi:10.1159/000081993  
918 87 Panda S, El khader I, Casellas F, *et al.* Short-Term Effect of Antibiotics on Human Gut  
919 Microbiota. *PLoS One* 2014;**9**:e95476. doi:10.1371/journal.pone.0095476  
920 88 Truong DT, Franzosa EA, Tickle TL, *et al.* MetaPhlan2 for enhanced metagenomic  
921 taxonomic profiling. *Nat Methods* 2015;**12**:902–3. doi:10.1038/nmeth.3589  
922 89 Rosero JA, Killer J, Sechovcová H, *et al.* Reclassification of *Eubacterium rectale*  
923 (Hauduroy *et al.* 1937) *prévot* 1938 in a new genus *agathobacter* gen. nov. as  
924 *Agathobacter rectalis* comb. nov., and description of *Agathobacter ruminis* sp. nov.,  
925 isolated from the rumen contents of sheep and cows. *Int J Syst Evol Microbiol*  
926 2016;**66**:768–73. doi:10.1099/ijsem.0.000788  
927 90 Parks DH, Chuvochina M, Waite DW, *et al.* A standardized bacterial taxonomy based on  
928 genome phylogeny substantially revises the tree of life. *Nat Biotechnol* 2018;**36**:256800.  
929 doi:10.1038/nbt.4229  
930 91 Yutin N, Galperin MY. A genomic update on clostridial phylogeny: Gram-negative spore  
931 formers and other misplaced clostridia. *Environ Microbiol* 2013;**6**:n/a-n/a.  
932 doi:10.1111/1462-2920.12173  
933 92 Austin MN, Rabe LK, Srinivasan S, *et al.* *Mageeibacillus indolicus* gen. nov., sp. nov.: A  
934 novel bacterium isolated from the female genital tract. *Anaerobe* 2015;**32**:37–42.  
935 doi:10.1016/j.anaerobe.2014.12.003  
936  
937
