# Supplementary material
Source: HighWire-hosted journal article supplement (https://gut.bmj.com/content/gutjnl-2018-317715)
Supplement: inline-supplementary-material-3 [file inline-supplementary-material-3.pdf]

## Supplemental Tables

| 16S <i>UB. ceftriaxensis</i> Specific primer |                          |                            |            |           |          |          |             |                             |                                |
|----------------------------------------------|--------------------------|----------------------------|------------|-----------|----------|----------|-------------|-----------------------------|--------------------------------|
|                                              | Sequence (5'->3')        | Tem<br>plate<br>stran<br>d | Len<br>gth | St<br>art | St<br>op | T<br>m   | G<br>C<br>% | Self<br>complem<br>entarity | Self 3'<br>complem<br>entarity |
| Forward primer                               | GGCAAGCGTTAT<br>CCGGAATG | Plus                       | 20         | 51<br>1   | 53<br>0  | 59<br>.7 | 55          | 6                           | 2                              |
| Reverse primer                               | GTAGTAGCGCCG<br>AGGTTGAG | Minu<br>s                  | 20         | 60<br>5   | 58<br>6  | 60<br>.3 | 60          | 4                           | 0                              |
| Internal oligo                               |                          | Plus                       |            |           |          |          |             |                             |                                |
| Product length                               |                          |                            |            |           |          | 94       |             |                             |                                |

**Suppl. Table 2: 16S primers to detect *UB. ceftriaxensis*.** 16S specific primers used for culturing experiments of *UB. ceftriaxensis*, constructed with NCBI primer blast.

|                                   | <i>UB. ceftriaxensis</i> | <i>P. distasonis</i> |
|-----------------------------------|--------------------------|----------------------|
| Assembly size                     | 2608799                  | 4884146              |
| Estimated genome completeness (%) | 94.76                    | 99.42                |
| Estimated contamination (%)       | 2.45                     | 0.38                 |
| N50                               | 1925355                  | 375178               |
| Number of scaffolds               | 8                        | 29                   |
| Average GC content (%)            | 51.67                    | 44.95                |
| Number of CDS                     | 2386                     | 4185                 |
| Number of rRNA genes              | 3                        | 12                   |
| Number of tRNA genes              | 45                       | 68                   |

**Suppl. Table 3: Assembly statistics.** For the two bacterial genomes reconstructed from metagenomes in this study, assembly statistics a good quality.

| Object | Length<br>( $\mu\text{m}$ ) | Width<br>( $\mu\text{m}$ ) |
|--------|-----------------------------|----------------------------|
| cell1  | 1.89                        | 0.78                       |
| cell2  | 1.15                        | 0.66                       |

|         |       |       |
|---------|-------|-------|
| cell3   | 1.35  | 0.85  |
| cell4   | 1.36  | 0.82  |
| cell5   | 1.64  | 0.95  |
|         |       |       |
| average | 1.478 | 0.812 |

**Suppl. Table 5: Cell size of new species.** <sup>U</sup>*Borkfalki ceftriaxensis* size measurements based on FISH staining of fecal samples.

| group                                                          | median<br>AA<br>percID | median<br>NT<br>percID | median<br>percID<br>16S | minimum<br>AA<br>percID | minimum<br>NT<br>percID | minimum<br>percID<br>16S |
|----------------------------------------------------------------|------------------------|------------------------|-------------------------|-------------------------|-------------------------|--------------------------|
| <b>all Ruminococcaceae</b>                                     | 60.71                  | 59.33                  | 88.81                   | 51.67                   | 54.32                   | 83.67                    |
| <b>Ruminococcaceae main cluster</b>                            | 65.40                  | 64.94                  | 90.36                   | 61.66                   | 61.68                   | 88.33                    |
| <b>Ruminococcaceae main cluster + Eriseae</b>                  | 61.03                  | 58.09                  | 88.46                   | 55.67                   | 54.32                   | 83.67                    |
| <b>Ruminococcaceae main cluster + Discordiaceae</b>            | 54.23                  | 57.54                  | 87.09                   | 51.67                   | 55.10                   | 85.00                    |
| <b>Eriseae</b>                                                 | 71.73                  | 69.56                  | 94.57                   | 70.71                   | 68.42                   | 91.61                    |
| <b>Discordiaceae</b>                                           | 63.27                  | 60.68                  | 86.11                   | 60.02                   | 58.89                   | 85.93                    |
| <b>Eriseae + Discordiaceae</b>                                 | 58.66                  | 58.55                  | 87.82                   | 55.43                   | 57.80                   | 83.89                    |
| <b>UB. ceftriaxensis + CAGs</b>                                | 63.33                  | 63.75                  | NA                      | 61.60                   | 61.94                   | NA                       |
| <b>UB. ceftriaxensis + CAGs + C.hongkongensis</b>              | 60.25                  | 61.20                  | 88.60                   | 56.86                   | 59.26                   | 88.44                    |
| <b>UB. ceftriaxensis + C.hongkongensis</b>                     | 56.86                  | 59.86                  | 88.60                   | 56.86                   | 59.86                   | 88.44                    |
| <b>Ruminococcaceae main cluster + UB. ceftriaxensis + CAGs</b> | 53.09                  | 57.31                  | 85.65                   | 51.46                   | 55.58                   | 83.98                    |
| <b>Eriseae + UB. ceftriaxensis + CAGs</b>                      | 55.05                  | 56.76                  | 86.62                   | 53.73                   | 55.01                   | 83.38                    |
| <b>Discordiaceae + UB. ceftriaxensis + CAGs</b>                | 52.04                  | 56.14                  | 85.08                   | 50.22                   | 55.30                   | 85.00                    |
| <b>Firmicutes within genus</b>                                 | 94.79                  | 88.23                  | 96.39                   | 93.61                   | 83.98                   | 94.31                    |
| <b>Firmicutes within family</b>                                | 70.90                  | 67.92                  | 91.56                   | 45.25<br>(60.9)         | 53.25<br>(60.51)        | 84.44<br>(88.68)         |
| <b>Firmicutes within class</b>                                 | 62.06                  | 61.58                  | 88.23                   | 55.02                   | 57.29                   | 85.23                    |

**Suppl. Table 9: Genetic similarity of taxonomic groups within Firmicutes.** Genetic distance among Firmicutes genomes within taxonomic groups indicated as median and minimum sequence identity of the the amino acid (AA) sequence of 40 conserved marker genes, the nucleotide similarity (NT) between 40 conserved marker genes and the 16S nucleotide sequence. In brackets the minimum sequence identity without the family Thermodesulfobiaceae is shown as it strongly deviates from all other families.

| Species                                        | Current family       | Suggested family                     | Supported 40AA | Supported 40nt | Supported 16S |                          |
|------------------------------------------------|----------------------|--------------------------------------|----------------|----------------|---------------|--------------------------|
| <b>Hungatella hathewayi</b>                    | Clostridiaceae       | Lachnospiraceae                      | Y              | Y              | Y             | <b>Reassign family</b>   |
| <b>Heliobacterium modesticaldum</b>            | Heliobacteriaceae    | Peptococcaceae                       | Y              | ?              | Y             |                          |
| <b>Bavariicoccus seileri</b>                   | Enterococcaceae      | Carnobacteriaceae                    | Y              | Y              | Y             |                          |
| <b>Sharpea azabuensis</b>                      | Lactobacillaceae     | Erysipelotrichaceae                  | Y              | Y              | Y             |                          |
| <b>Alkaliphilus transvaalensis</b>             | Clostridiaceae       | Peptostreptococcaceae                | Y              | Y              | Y             |                          |
| <b>Clostridium aceticum</b>                    | Clostridiaceae       | Peptostreptococcaceae                | Y              | Y              | Y             |                          |
| <b>Butyricicoccus pullicaecorum</b>            | Clostridiceae        | Ruminococcaceae/ or Oscillospiraceae | Y              | Y              | Y             |                          |
| <b>Coprothermobacter platensis</b>             | Thermodesulfobiaceae | ?                                    | Y              | Y              | Y             | <b>Create new family</b> |
| <b>Clostridium cellulyticum</b>                | Ruminococcaceae      | Erisaceae                            | Y              | Y              | Y             |                          |
| <b>Clostridium josui</b>                       | Ruminococcaceae      | Erisaceae                            | Y              | Y              | Y             |                          |
| <b>Pseudobacteroides cellulosolvens</b>        | Ruminococcaceae      | Erisaceae                            | Y              | Y              | Y             |                          |
| <b>Ruminoclostridium thermocellum</b>          | Ruminococcaceae      | Erisaceae                            | Y              | Y              | Y             |                          |
| <b>Acetivibrio cellulyticus</b>                | Ruminococcaceae      | Erisaceae                            | Y              | Y              | Y             |                          |
| <b><i>Ruminococcaceae bacterium</i> AB4001</b> | Ruminococcaceae      | Discordiaceae                        | Y              | Y              | Y             |                          |
| <b><i>Ruminococcaceae bacterium</i> AE2021</b> | Ruminococcaceae      | Discordiaceae                        | Y              | Y              | Y             |                          |
| <b><i>Mageeibacillus indolicus</i></b>         | Ruminococcaceae      | Discordiaceae                        | Y              | Y              | Y             |                          |
| <b>Caldisalibacter kiritimatiensis</b>         | Clostridiaceae       | ?                                    | Y              | Y              | Y             |                          |
| <b>Clostridiisalibacter paucivorans</b>        | Clostridiaceae       | ?                                    | Y              | Y              | Y             |                          |

|                                    |                |   |   |   |   |  |
|------------------------------------|----------------|---|---|---|---|--|
| <b>Caloranaerobacter azorensis</b> | Clostridiaceae | ? | Y | Y | Y |  |
|------------------------------------|----------------|---|---|---|---|--|

**Suppl. Table 10: Restructured Firmicutes phylogeny.** Proposed changes to current Firmicutes taxonomy, based on 40 marker genes (AA or nt sequence) or 16S rRNA gene based maximum likelihood phylogenies.

| ARG | p-value  | Enrichment                         | PostHoc test                        | 2nd-AB - 1st-AB | post-AB - 1st-AB | pre-AB - 1st-AB | post-AB - 2nd-AB | pre-AB - 2nd-AB | pre-AB - post-AB |
|-----|----------|------------------------------------|-------------------------------------|-----------------|------------------|-----------------|------------------|-----------------|------------------|
|     |          | 0.001077                           | pre-AB = 2nd-AB >> post-AB > 1st-AB | q-val           | 0.066806723      | 0.042857143     | 0.068571429      | 0.00140056      | 0.904761905      |
|     |          |                                    | p-val                               | 0.035714286     | 0.014285714      | 0.057142857     | 0.000233427      | 0.904761905     | 0.044537815      |
| PPG | p-value  | Enrichment                         | PostHoc test                        | 2nd-AB - 1st-AB | post-AB - 1st-AB | pre-AB - 1st-AB | post-AB - 2nd-AB | pre-AB - 2nd-AB | pre-AB - post-AB |
|     | 0.037756 | 1st-AB = pre-AB = post-AB > 2nd-AB | q-val                               | 0.685714286     | 0.685714286      | 0.857142857     | 0.026610644      | 0.095238095     | 0.260504202      |
|     |          |                                    | p-val                               | 0.571428571     | 0.521428571      | 0.857142857     | 0.004435107      | 0.031746032     | 0.130252101      |

**Suppl. Table 12: Significant changes in overall PPG and ARG potential between antibiotic treatments.** Kruskal-Wallis test and posthoc test on the total ARG (antibiotic resistance gene) and PPG (putative pathogenicity gene) abundance between different phases in HD.S1 time series. 1st-AB refers to the first response stage samples after Ceftriaxone treatment (n=2) and 2nd-AB referring to the second response stage of the community (n=5), pre-AB (n=4) and post-AB (n=13) samples being all other HD.S1 samples. Enrichment columns shows the median class abundance for each feature sorted descending, with "=" indicating no significant difference between adjacent labels and "<", "<<", "<<<" indicating a significant difference at q<0.1, 0.05, 0.01, respectively, in a post-hoc test.
