# Supplementary material
Source: HighWire-hosted journal article supplement (https://gut.bmj.com/content/gutjnl-2018-317715)
Supplement: inline-supplementary-material-7 [file inline-supplementary-material-7.xlsx]

## Sheet: Summary
gene	Contig	StartStop	ABRc	ABRcl	CZYsub	CZy	KGM	KGMdesc	KGMec	NOG	NOGcat	NOGdesc	PTV	PTVcat	PTVdesc	VDB	VIRcat	VIRdesc	SEEDECs	SEEDfun	SEEDsub	TCDB	TCDBcl	modGMM	modGMMdesc	modKEEG	modKEEGdesc	modKEEGh0	modKEEGh1	modKEEGh2	modKEEGh3
fig|6666666.214148.peg.1	MM4TEC2__C1_L=46754=	1+167																			- none -
fig|6666666.214148.peg.10	MM4TEC2__C1_L=46754=	7852+1454																			- none -
fig|6666666.214148.peg.100	MM4TEC2__C2_L=1925355=	40693-824								COG0489	D	ATP-binding protein								nucleotide-binding protein	- none -	3.A.1	ABC
fig|6666666.214148.peg.1000	MM4TEC2__C2_L=1925355=	1012517+413					K02996	small subunit ribosomal protein S9		COG0103	J	30S ribosomal protein S9								SSU ribosomal protein S9p (S16e)	- none -					M00179,M00178,	Ribosome, archaea;Ribosome, bacteria;	Structural complex;	Genetic information processing;	Ribosome;
fig|6666666.214148.peg.1001	MM4TEC2__C2_L=1925355=	1013248-260																			- none -
fig|6666666.214148.peg.1002	MM4TEC2__C2_L=1925355=	1013356+2018																			- none -
fig|6666666.214148.peg.1003	MM4TEC2__C2_L=1925355=	1015602+494																			- none -
fig|6666666.214148.peg.1004	MM4TEC2__C2_L=1925355=	1016423-281																			- none -
fig|6666666.214148.peg.1005	MM4TEC2__C2_L=1925355=	1016520+1508																			- none -
fig|6666666.214148.peg.1006	MM4TEC2__C2_L=1925355=	1018031+116																			- none -
fig|6666666.214148.peg.1007	MM4TEC2__C2_L=1925355=	1018170+917					K00919	4-diphosphocytidyl-2-C-methyl-D-erythritol kinase	EC:2.7.1.148	COG1947	I	Catalyzes the phosphorylation of the position 2 hydroxy group of 4-diphosphocytidyl-2C-methyl-D-erythritol (By similarity)									- none -					M00096,	C5 isoprenoid biosynthesis, non-mevalonate pathway;	Pathway module;	Carbohydrate and lipid metabolism;	Terpenoid backbone biosynthesis;
fig|6666666.214148.peg.1008	MM4TEC2__C2_L=1925355=	1019101+890																			- none -
fig|6666666.214148.peg.1009	MM4TEC2__C2_L=1925355=	1020181+656					K01926	redox-sensing transcriptional repressor		COG2344	K	Modulates transcription in response to changes in cellular NADH NAD( ) redox state (By similarity)								Redox-sensitive transcriptional regulator (AT-rich DNA-binding protein)	- none -
fig|6666666.214148.peg.101	MM4TEC2__C2_L=1925355=	40940-236					K01821	4-oxalocrotonate tautomerase	EC:5.3.2.6	COG1942	S	4-oxalocrotonate tautomerase									- none -
fig|6666666.214148.peg.1010	MM4TEC2__C2_L=1925355=	1020859+2597					K04072	acetaldehyde dehydrogenase / alcohol dehydrogenase [EC:1.2.1.10 1.1.1.1]		COG1012	C	Dehydrogenase							EC 1.2.1.10;EC 1.1.1.1	Acetaldehyde dehydrogenase / Alcohol dehydrogenase	5-FCL-like protein;Fermentations: Lactate; <br>Fermentations: Mixed acid; <br>Fermentations: Mixed acid; <br>Glycerolipid and Glycerophospholipid Metabolism in Bacteria; <br>Pyruvate metabolism II: acetyl-CoA, acetogenesis from pyruvate			MF0001,MF0001,MF0002,MF0029,	ethanol production (formate pathway);ethanol production (formate pathway);ethanol production (CO2 pathway) ;threonine degradation (glycine pathway);
fig|6666666.214148.peg.1011	MM4TEC2__C2_L=1925355=	1023471+746								ENOG4111R49	S	Aminoglycoside phosphotransferase									- none -
fig|6666666.214148.peg.1012	MM4TEC2__C2_L=1925355=	1024477-197								ENOG410XUC3	K	Transcriptional regulator									- none -
fig|6666666.214148.peg.1013	MM4TEC2__C2_L=1925355=	1024574+293																			- none -
fig|6666666.214148.peg.1014	MM4TEC2__C2_L=1925355=	1025827-911				GT4	K00384	thioredoxin reductase (NADPH)	EC:1.8.1.9	COG0492	O	thioredoxin reductase							EC 1.8.1.9	Thioredoxin reductase	Thioredoxin-disulfide reductase;pyrimidine conversions
fig|6666666.214148.peg.1015	MM4TEC2__C2_L=1925355=	1028192-2363					K00527	ribonucleoside-triphosphate reductase	EC:1.17.4.2	COG1328	F	Anaerobic ribonucleoside-triphosphate reductase							EC 1.17.4.2	Ribonucleotide reductase of class III (anaerobic), large subunit	Ribonucleotide reduction					M00053,	Pyrimidine deoxyribonuleotide biosynthesis, CDP/CTP => dCDP/dCTP,dTDP/dTTP;	Pathway module;	Nucleotide and amino acid metabolism;	Pyrimidine metabolism;
fig|6666666.214148.peg.1016	MM4TEC2__C2_L=1925355=	1028410+482																			- none -
fig|6666666.214148.peg.1017	MM4TEC2__C2_L=1925355=	1029332-416																			- none -
fig|6666666.214148.peg.1018	MM4TEC2__C2_L=1925355=	1029449+710								COG4123	S	Specifically methylates the adenine in position 37 of tRNA(1)(Val) (anticodon cmo5UAC) (By similarity)									- none -
fig|6666666.214148.peg.1019	MM4TEC2__C2_L=1925355=	1030172+818					K07056	16S rRNA (cytidine1402-2'-O)-methyltransferase	EC:2.1.1.198	COG0313	S	Catalyzes the 2'-O-methylation of the ribose of cytidine 1402 (C1402) in 16S rRNA (By similarity)							EC 2.1.1.198	16S rRNA (cytidine(1402)-2&#39;-O)-methyltransferase	- none -
fig|6666666.214148.peg.102	MM4TEC2__C2_L=1925355=	42733-1775				GT4	K06147	ATP-binding cassette, subfamily B, bacterial		COG1132	V	(ABC) transporter	Efflux_0	Virulence	Efflux ABC transporter, permeaseATP-binding protein SCO2464					ABC transporter, ATP-binding/permease protein	- none -	3.A.1	ABC
fig|6666666.214148.peg.1020	MM4TEC2__C2_L=1925355=	1031081+1016								ENOG410ZJRR	S	DNA-binding helix-turn-helix protein									- none -
fig|6666666.214148.peg.1021	MM4TEC2__C2_L=1925355=	1032953-824					K04486	histidinol-phosphatase (PHP family)	EC:3.1.3.15	COG1387	E	histidinol phosphate phosphatase, hisj family									- none -
fig|6666666.214148.peg.1022	MM4TEC2__C2_L=1925355=	1033494-431																			- none -
fig|6666666.214148.peg.1023	MM4TEC2__C2_L=1925355=	1035396-1610								COG1961	L	Resolvase								Site-specific recombinase	- none -
fig|6666666.214148.peg.1024	MM4TEC2__C2_L=1925355=	1035633+983					K02529	LacI family transcriptional regulator		COG1609	K	Transcriptional regulator				BopD	Biofilm formation	bacterial regulatory protein, LacI family protein			- none -
fig|6666666.214148.peg.1025	MM4TEC2__C2_L=1925355=	1036719+2033					K10118	raffinose/stachyose/melibiose transport system permease protein		COG2319	S	wd repeat	N-acetyl-D-glucosamine_0	Virulence	N-acetyl-D-glucosamine ABC transporter, permease protein 1						- none -	3.A.1	ABC			M00196,	Raffinose/stachyose/melibiose transport system;	Structural complex;	Environmental information processing;	Saccharide, polyol, and lipid transport system;
fig|6666666.214148.peg.1026	MM4TEC2__C2_L=1925355=	1038755+899					K02026	multiple sugar transport system permease protein		COG0395	G	Binding-protein-dependent transport systems inner membrane component	Maltodextrin_0	Virulence	Maltodextrin ABC transporter, permease protein MdxG						- none -	3.A.1	ABC
fig|6666666.214148.peg.1027	MM4TEC2__C2_L=1925355=	1039680+1805																		Insecticidal toxin complex protein TccB1	- none -
fig|6666666.214148.peg.1028	MM4TEC2__C2_L=1925355=	1041497+1892								ENOG410YUDY	S	NA									- none -
fig|6666666.214148.peg.1029	MM4TEC2__C2_L=1925355=	1043400+2123								ENOG410YUDY	S	NA									- none -
fig|6666666.214148.peg.103	MM4TEC2__C2_L=1925355=	44574-1838					K06147	ATP-binding cassette, subfamily B, bacterial		COG1132	V	(ABC) transporter	Efflux_0	Virulence	Efflux ABC transporter, permeaseATP-binding protein SCO2464	LOS	Adherence|Endotoxin	lipid A export ATP-binding/permease protein			- none -	3.A.1	ABC
fig|6666666.214148.peg.1030	MM4TEC2__C2_L=1925355=	1045607+3200																			- none -
fig|6666666.214148.peg.1031	MM4TEC2__C2_L=1925355=	1049038-191																			- none -
fig|6666666.214148.peg.1032	MM4TEC2__C2_L=1925355=	1049869-770																		hypothetical protein formerly called flagellar hook-length control protein FliK	- none -
fig|6666666.214148.peg.1033	MM4TEC2__C2_L=1925355=	1050951-1085				GT2				COG0463	M	Glycosyl transferase, family 2								Glycosyl transferase, group 2 family	- none -
fig|6666666.214148.peg.1034	MM4TEC2__C2_L=1925355=	1051262+1136								COG2855	S	Membrane								Putative membrane protein YeiH	- none -	2.A.98	CPA
fig|6666666.214148.peg.1035	MM4TEC2__C2_L=1925355=	1052543+746								COG2755	E	lipolytic protein G-D-S-L family									- none -
fig|6666666.214148.peg.1036	MM4TEC2__C2_L=1925355=	1053367+1295								ENOG410XT7T	S	Alcohol acetyltransferase									- none -
fig|6666666.214148.peg.1037	MM4TEC2__C2_L=1925355=	1054672+728																			- none -
fig|6666666.214148.peg.1038	MM4TEC2__C2_L=1925355=	1055420+821								ENOG410XPK9	S	membrane									- none -
fig|6666666.214148.peg.1039	MM4TEC2__C2_L=1925355=	1056241+548					K02443	glycerol uptake operon antiterminator		COG1954	K	glycerol-3-phosphate responsive antiterminator									- none -
fig|6666666.214148.peg.104	MM4TEC2__C2_L=1925355=	47515-2465								COG1368	M	Sulfatase									- none -
fig|6666666.214148.peg.1040	MM4TEC2__C2_L=1925355=	1056946+2057				GT2				COG0463	M	Glycosyl transferase, family 2	Uncharacterized_0	Virulence	Uncharacterized glycosyltransferase YibD						- none -
fig|6666666.214148.peg.1041	MM4TEC2__C2_L=1925355=	1058996+803																			- none -
fig|6666666.214148.peg.1042	MM4TEC2__C2_L=1925355=	1059812+515					K02217	ferritin	EC:1.16.3.2	COG1528	P	Stores iron in a soluble, non-toxic, readily available form. Important for iron homeostasis (By similarity)	Ferritin_0	Virulence|Intracellular survival and replication	Ferritin					Ferritin and Dps	- none -
fig|6666666.214148.peg.1043	MM4TEC2__C2_L=1925355=	1061781-1421					K01163	uncharacterized protein		COG4866	S	conserved protein									- none -
fig|6666666.214148.peg.1044	MM4TEC2__C2_L=1925355=	1062616-767								ENOG410ZJRR	S	DNA-binding helix-turn-helix protein									- none -
fig|6666666.214148.peg.1045	MM4TEC2__C2_L=1925355=	1064063-1364								COG0534	V	Mate efflux family protein								Multi antimicrobial extrusion protein (Na(+)/drug antiporter), MATE family of MDR efflux pumps	Multidrug Resistance Efflux Pumps	2.A.66	MOP
fig|6666666.214148.peg.1046	MM4TEC2__C2_L=1925355=	1064182+467					K03976	Cys-tRNA(Pro)/Cys-tRNA(Cys) deacylase [EC:3.1.1.-]		COG2606	S	YbaK ebsC protein									- none -
fig|6666666.214148.peg.1047	MM4TEC2__C2_L=1925355=	1064939-287																			- none -
fig|6666666.214148.peg.1048	MM4TEC2__C2_L=1925355=	1065107-128																			- none -
fig|6666666.214148.peg.1049	MM4TEC2__C2_L=1925355=	1065973-848					K00100			COG0656	S	reductase								oxidoreductase of aldo/keto reductase family, subgroup 1	- none -	8.A.5	8.A.5
fig|6666666.214148.peg.105	MM4TEC2__C2_L=1925355=	48870-1346					K00928	aspartate kinase	EC:2.7.2.4	COG0527	E	Aspartokinase	Aspartokinase_0	Intracellular survival and replication	Aspartokinase (EC 2.7.2.4)				EC 2.7.2.4	Aspartokinase	CBSS-216591.1.peg.168;Lysine Biosynthesis DAP Pathway; <br>Lysine Biosynthesis DAP Pathway, GJO scratch; <br>Threonine and Homoserine Biosynthesis
fig|6666666.214148.peg.1050	MM4TEC2__C2_L=1925355=	1066117-122																			- none -
fig|6666666.214148.peg.1051	MM4TEC2__C2_L=1925355=	1066180+1544					K03307	solute:Na+ symporter, SSS family		COG0591	E	symporter								Sodium/proline symporter	- none -	2.A.21	APC
fig|6666666.214148.peg.1052	MM4TEC2__C2_L=1925355=	1072669-4898																			- none -
fig|6666666.214148.peg.1053	MM4TEC2__C2_L=1925355=	1072814+2201			PlantCW	GH78				ENOG410XRPP	S	Bacterial alpha-L-rhamnosidase									- none -
fig|6666666.214148.peg.1054	MM4TEC2__C2_L=1925355=	1076150-1118					K13747	carboxynorspermidine decarboxylase	EC:4.1.1.96	COG0019	E	Specifically catalyzes the decarboxylation of meso- diaminopimelate (meso-DAP) to L-lysine (By similarity)							EC 4.1.1.96	Carboxynorspermidine decarboxylase	- none -
fig|6666666.214148.peg.1055	MM4TEC2__C2_L=1925355=	1077352-1202					K00290	saccharopine dehydrogenase (NAD+, L-lysine forming)	EC:1.5.1.7	COG1748	E	saccharopine dehydrogenase							EC 1.5.1.43	Carboxynorspermidine synthase	- none -
fig|6666666.214148.peg.1056	MM4TEC2__C2_L=1925355=	1078219-863					K01480	agmatinase	EC:3.5.3.11	COG0010	E	hydrolase activity, acting on carbon-nitrogen (but not peptide) bonds, in linear amidines							EC 3.5.3.11	Agmatinase	Arginine and Ornithine Degradation;Polyamine Metabolism			MF0043,	arginine degradation (agmatinase pathway);	M00133,	Polyamine biosynthesis, arginine => agmatine => putrescine => spermidine;	Pathway module;	Nucleotide and amino acid metabolism;	Polyamine biosynthesis;
fig|6666666.214148.peg.1057	MM4TEC2__C2_L=1925355=	1079060-860					K00797	spermidine synthase	EC:2.5.1.16	COG0421	E	Catalyzes the production of spermidine from putrescine and decarboxylated S-adenosylmethionine (dcSAM), which serves as an aminopropyl donor (By similarity)							EC 2.5.1.16	Spermidine synthase	Polyamine Metabolism					M00133,M00034,	Polyamine biosynthesis, arginine => agmatine => putrescine => spermidine;Methionine salvage pathway;	Pathway module;	Nucleotide and amino acid metabolism;	Polyamine biosynthesis;
fig|6666666.214148.peg.1058	MM4TEC2__C2_L=1925355=	1080519-1448								COG1982	E	decarboxylase	Arginine_0	Intracellular survival and replication	Arginine decarboxylase (EC 4.1.1.19) Lysine decarboxylase (EC 4.1.1.18)				EC 4.1.1.19	Arginine decarboxylase	Arginine and Ornithine Degradation;Polyamine Metabolism
fig|6666666.214148.peg.1059	MM4TEC2__C2_L=1925355=	1081285-755					K01611	S-adenosylmethionine decarboxylase	EC:4.1.1.50	COG1586	E	Catalyzes the decarboxylation of S-adenosylmethionine to S-adenosylmethioninamine (dcAdoMet), the propylamine donor required for the synthesis of the polyamines spermine and spermidine from the diamine putrescine (By similarity)							EC 4.1.1.50	S-adenosylmethionine decarboxylase proenzyme , prokaryotic class 1A	Polyamine Metabolism					M00133,M00034,	Polyamine biosynthesis, arginine => agmatine => putrescine => spermidine;Methionine salvage pathway;	Pathway module;	Nucleotide and amino acid metabolism;	Polyamine biosynthesis;
fig|6666666.214148.peg.106	MM4TEC2__C2_L=1925355=	50072-1199								ENOG410XRP0	S	conserved protein UCP033563									- none -
fig|6666666.214148.peg.1060	MM4TEC2__C2_L=1925355=	1081589+137																			- none -
fig|6666666.214148.peg.1061	MM4TEC2__C2_L=1925355=	1081761+455								ENOG4111TUC	K	transcriptional regulator), MarR family									- none -
fig|6666666.214148.peg.1062	MM4TEC2__C2_L=1925355=	1082213+1331								COG0534	V	Mate efflux family protein								Multi antimicrobial extrusion protein (Na(+)/drug antiporter), MATE family of MDR efflux pumps	Multidrug Resistance Efflux Pumps	2.A.66	MOP
fig|6666666.214148.peg.1063	MM4TEC2__C2_L=1925355=	1083635+1103				GT4	K01854	UDP-galactopyranose mutase	EC:5.4.99.9	COG0562	M	UDP-galactopyranose mutase				Capsule	Antiphagocytosis|Serum resistance	UDP-galactopyranose mutase	EC 5.4.99.9	UDP-galactopyranose mutase	- none -
fig|6666666.214148.peg.1064	MM4TEC2__C2_L=1925355=	1084831+1676																			- none -
fig|6666666.214148.peg.1065	MM4TEC2__C2_L=1925355=	1086942-347																			- none -
fig|6666666.214148.peg.1066	MM4TEC2__C2_L=1925355=	1087172+563					K03088	RNA polymerase sigma-70 factor, ECF subfamily		COG1595	K	RNA Polymerase									- none -
fig|6666666.214148.peg.1067	MM4TEC2__C2_L=1925355=	1087803+845																			- none -
fig|6666666.214148.peg.1068	MM4TEC2__C2_L=1925355=	1088658+671																			- none -
fig|6666666.214148.peg.1069	MM4TEC2__C2_L=1925355=	1089657+2315				GH65	K05342	alpha,alpha-trehalose phosphorylase	EC:2.4.1.64	COG1554	G	hydrolase family 65								Alpha,alpha-trehalose phosphorylase (2.4.1.64)	- none -
fig|6666666.214148.peg.107	MM4TEC2__C2_L=1925355=	50203-113																			- none -
fig|6666666.214148.peg.1070	MM4TEC2__C2_L=1925355=	1091982+2063			PlantCW	GH78				ENOG410XNWE	S	K05989 alpha-L-rhamnosidase EC 3.2.1.40							EC 3.2.1.40	Alfa-L-rhamnosidase	- none -
fig|6666666.214148.peg.1071	MM4TEC2__C2_L=1925355=	1094049+1511					K17319	putative aldouronate transport system permease protein		COG4209	G	Binding-protein-dependent transport systems inner membrane component	N-acetyl-D-glucosamine_0	Virulence	N-acetyl-D-glucosamine ABC transporter, permease protein 1						- none -	3.A.1	ABC			M00603,	Putative aldouronate transport system;	Structural complex;	Environmental information processing;	Saccharide, polyol, and lipid transport system;
fig|6666666.214148.peg.1072	MM4TEC2__C2_L=1925355=	1095572+920					K17320	putative aldouronate transport system permease protein		COG0395	G	Binding-protein-dependent transport systems inner membrane component	Maltodextrin_0	Virulence	Maltodextrin ABC transporter, permease protein MdxG						- none -	3.A.1	ABC			M00603,	Putative aldouronate transport system;	Structural complex;	Environmental information processing;	Saccharide, polyol, and lipid transport system;
fig|6666666.214148.peg.1073	MM4TEC2__C2_L=1925355=	1096505+1712								COG1653	G	transporter activity									- none -
fig|6666666.214148.peg.1074	MM4TEC2__C2_L=1925355=	1098242+2270								COG2247	M	Cell wall binding repeat 2-containing protein								Phage tail tube protein	- none -
fig|6666666.214148.peg.1075	MM4TEC2__C2_L=1925355=	1100523+2564																			- none -
fig|6666666.214148.peg.1076	MM4TEC2__C2_L=1925355=	1103098+944																			- none -
fig|6666666.214148.peg.1077	MM4TEC2__C2_L=1925355=	1104068+812			PlantCW	GH39				ENOG410XP2B	K	Transcriptional regulator									- none -
fig|6666666.214148.peg.1078	MM4TEC2__C2_L=1925355=	1104902+1079								ENOG4111TTJ	S	Uroporphyrinogen decarboxylase (URO-D)									- none -
fig|6666666.214148.peg.1079	MM4TEC2__C2_L=1925355=	1106197+3335																			- none -
fig|6666666.214148.peg.108	MM4TEC2__C2_L=1925355=	51024-824					K18672	diadenylate cyclase	EC:2.7.7.85	COG1624	S	TIGR00159 family								Diadenylate cyclase spyDAC; Bacterial checkpoint controller DisA with nucleotide-binding domain	Bacterial checkpoint-control-related cluster;Bacterial checkpoint-control-related cluster
fig|6666666.214148.peg.1080	MM4TEC2__C2_L=1925355=	1109602+1016					K17319	putative aldouronate transport system permease protein		COG4209	G	Binding-protein-dependent transport systems inner membrane component	N-acetyl-D-glucosamine_0	Virulence	N-acetyl-D-glucosamine ABC transporter, permease protein 1					Xylose ABC transporter, permease component	Xylose utilization	3.A.1	ABC			M00603,	Putative aldouronate transport system;	Structural complex;	Environmental information processing;	Saccharide, polyol, and lipid transport system;
fig|6666666.214148.peg.1081	MM4TEC2__C2_L=1925355=	1110628+869				GH130	K17320	putative aldouronate transport system permease protein		COG0395	G	Binding-protein-dependent transport systems inner membrane component	Maltodextrin_0	Virulence	Maltodextrin ABC transporter, permease protein MdxG						- none -	3.A.1	ABC			M00603,	Putative aldouronate transport system;	Structural complex;	Environmental information processing;	Saccharide, polyol, and lipid transport system;
fig|6666666.214148.peg.1082	MM4TEC2__C2_L=1925355=	1111508+1709					K17318	putative aldouronate transport system substrate-binding protein		COG1653	G	transporter activity									- none -					M00603,	Putative aldouronate transport system;	Structural complex;	Environmental information processing;	Saccharide, polyol, and lipid transport system;
fig|6666666.214148.peg.1083	MM4TEC2__C2_L=1925355=	1113299+1574			PlantCW	GH36	K07407	alpha-galactosidase	EC:3.2.1.22	ENOG4111GAY	S	NA									- none -			MF0050,	melibiose degradation;
fig|6666666.214148.peg.1084	MM4TEC2__C2_L=1925355=	1114870+1601			PlantCW	GH36	K07407	alpha-galactosidase	EC:3.2.1.22	COG3345	G	alpha-galactosidase							EC 3.2.1.22	Alpha-galactosidase	Galactosylceramide and Sulfatide metabolism;Lactose and Galactose Uptake and Utilization			MF0050,	melibiose degradation;
fig|6666666.214148.peg.1085	MM4TEC2__C2_L=1925355=	1116525+2738			PlantCW	GH78				ENOG410XRPP	S	Bacterial alpha-L-rhamnosidase									- none -
fig|6666666.214148.peg.1086	MM4TEC2__C2_L=1925355=	1119284+977					K00845	glucokinase	EC:2.7.1.2	COG1940	G	ROK family	ROK_0	Cellular metabolism	ROK family sugar kinase or transcriptional regulator					transcriptional repressor/ROK family	- none -			MF0080,	Glycolysis (preparatory phase);	M00549,M00001,	Nucleotide sugar biosynthesis, glucose => UDP-glucose;Glycolysis (Embden-Meyerhof pathway), glucose => pyruvate;	Pathway module;	Carbohydrate and lipid metabolism;	Sugar metabolism;
fig|6666666.214148.peg.1087	MM4TEC2__C2_L=1925355=	1120248+2447			PlantCW,AnimalCarb	GH2	K01192	beta-mannosidase	EC:3.2.1.25	COG3250	G	hydrolase family 2							EC 3.2.1.25	Beta-mannosidase	Mannose Metabolism
fig|6666666.214148.peg.1088	MM4TEC2__C2_L=1925355=	1123845-1124					K01599	uroporphyrinogen decarboxylase	EC:4.1.1.37	ENOG410YGBQ	H	methyltransferase									- none -					M00121,	Heme biosynthesis, glutamate => protoheme/siroheme;	Pathway module;	Nucleotide and amino acid metabolism;	Cofactor and vitamin biosynthesis;
fig|6666666.214148.peg.1089	MM4TEC2__C2_L=1925355=	1126169-2306			PlantCW,AnimalCarb	GH2	K01192	beta-mannosidase	EC:3.2.1.25	COG3250	G	hydrolase family 2							EC 3.2.1.25	Beta-mannosidase	Mannose Metabolism
fig|6666666.214148.peg.109	MM4TEC2__C2_L=1925355=	52107-986					K02340	DNA polymerase III subunit delta	EC:2.7.7.7	COG1466	L	DNA polymerase III (delta' subunit)									- none -					M00260,	DNA polymerase III complex, bacteria;	Structural complex;	Genetic information processing;	DNA polymerase;
fig|6666666.214148.peg.1090	MM4TEC2__C2_L=1925355=	1126316+953					K01599	uroporphyrinogen decarboxylase	EC:4.1.1.37	ENOG410YPB0	S	Uroporphyrinogen decarboxylase (URO-D)									- none -					M00121,	Heme biosynthesis, glutamate => protoheme/siroheme;	Pathway module;	Nucleotide and amino acid metabolism;	Cofactor and vitamin biosynthesis;
fig|6666666.214148.peg.1091	MM4TEC2__C2_L=1925355=	1127266+1208																			- none -
fig|6666666.214148.peg.1092	MM4TEC2__C2_L=1925355=	1129668-1163								COG1940	G	ROK family	ROK_0	Cellular metabolism	ROK family sugar kinase or transcriptional regulator						- none -
fig|6666666.214148.peg.1093	MM4TEC2__C2_L=1925355=	1129882+2009								COG0145	EQ	5-oxoprolinase								Hydantoinase/oxoprolinase family protein	- none -
fig|6666666.214148.peg.1094	MM4TEC2__C2_L=1925355=	1131983+884								ENOG410Y0ZZ	S	NA									- none -
fig|6666666.214148.peg.1095	MM4TEC2__C2_L=1925355=	1133668-755			PlantCW	GH39	K18954	AraC family transcriptional regulator, transcriptional activator of pobA		ENOG4111AZ4	K	Transcriptional regulator, ARAC family									- none -
fig|6666666.214148.peg.1096	MM4TEC2__C2_L=1925355=	1133886+1475					K10117	raffinose/stachyose/melibiose transport system substrate-binding protein													- none -					M00196,	Raffinose/stachyose/melibiose transport system;	Structural complex;	Environmental information processing;	Saccharide, polyol, and lipid transport system;
fig|6666666.214148.peg.1097	MM4TEC2__C2_L=1925355=	1135371+440																			- none -
fig|6666666.214148.peg.1098	MM4TEC2__C2_L=1925355=	1135808+959					K10118	raffinose/stachyose/melibiose transport system permease protein		COG2319	S	wd repeat	N-acetyl-D-glucosamine_0	Virulence	N-acetyl-D-glucosamine ABC transporter, permease protein 1						- none -	3.A.1	ABC			M00196,	Raffinose/stachyose/melibiose transport system;	Structural complex;	Environmental information processing;	Saccharide, polyol, and lipid transport system;
fig|6666666.214148.peg.1099	MM4TEC2__C2_L=1925355=	1136767+845				GH130	K02026	multiple sugar transport system permease protein		COG0395	G	Binding-protein-dependent transport systems inner membrane component	N-acetyl-D-glucosamine_0	Virulence	N-acetyl-D-glucosamine ABC transporter, permease protein 2						- none -	3.A.1	ABC
fig|6666666.214148.peg.11	MM4TEC2__C1_L=46754=	9407+170																			- none -
fig|6666666.214148.peg.110	MM4TEC2__C2_L=1925355=	54263-2156					K02238	competence protein ComEC		COG2333	S	DNA internalization-related competence protein ComEC Rec2									- none -
fig|6666666.214148.peg.1100	MM4TEC2__C2_L=1925355=	1137637+914					K01239	purine nucleosidase	EC:3.2.2.1	COG1957	F	nucleoside hydrolase							EC 3.2.2.1	Inosine-uridine preferring nucleoside hydrolase	Purine conversions;Queuosine-Archaeosine Biosynthesis
fig|6666666.214148.peg.1101	MM4TEC2__C2_L=1925355=	1138561+2249				GH0				ENOG410XT3T	S	hydrolase family 2, sugar binding									- none -
fig|6666666.214148.peg.1102	MM4TEC2__C2_L=1925355=	1140825+2531																			- none -
fig|6666666.214148.peg.1103	MM4TEC2__C2_L=1925355=	1143366+2117			PlantCW	GH78	K05989	alpha-L-rhamnosidase	EC:3.2.1.40	ENOG410XRPP	S	Bacterial alpha-L-rhamnosidase									- none -
fig|6666666.214148.peg.1104	MM4TEC2__C2_L=1925355=	1145485+1337																			- none -
fig|6666666.214148.peg.1105	MM4TEC2__C2_L=1925355=	1146928+2789				GH0				ENOG410XT3T	S	hydrolase family 2, sugar binding									- none -
fig|6666666.214148.peg.1106	MM4TEC2__C2_L=1925355=	1150325-572					K01808	ribose 5-phosphate isomerase B	EC:5.3.1.6	COG0698	G	Isomerase							EC 5.3.1.6	Ribose 5-phosphate isomerase B	D-ribose utilization;Pentose phosphate pathway			MF0053,MF0079,MF0090,	allose degradation;bifidobacterium shunt;pentose phosphate pathway (non-oxidative branch);	M00007,	Pentose phosphate pathway, non-oxidative phase, fructose 6P => ribose 5P;	Pathway module;	Carbohydrate and lipid metabolism;	Central carbohydrate metabolism;
fig|6666666.214148.peg.1107	MM4TEC2__C2_L=1925355=	1151223-803								COG2207	K	Transcriptional Regulator AraC Family									- none -
fig|6666666.214148.peg.1108	MM4TEC2__C2_L=1925355=	1151526+1211								ENOG4112B6F	S	NA									- none -
fig|6666666.214148.peg.1109	MM4TEC2__C2_L=1925355=	1152751+1418					K02027	multiple sugar transport system substrate-binding protein		COG1653	G	transporter activity									- none -					M00207,	Putative multiple sugar transport system;	Structural complex;	Environmental information processing;	Saccharide, polyol, and lipid transport system;
fig|6666666.214148.peg.111	MM4TEC2__C2_L=1925355=	59940-5675								COG1112	L	Helicase									- none -
fig|6666666.214148.peg.1110	MM4TEC2__C2_L=1925355=	1154184+1001					K02025	multiple sugar transport system permease protein		COG1175	P	binding-protein-dependent transport systems inner membrane Component	N-acetyl-D-glucosamine_0	Virulence	N-acetyl-D-glucosamine ABC transporter, permease protein 1					N-Acetyl-D-glucosamine ABC transport system, permease protein 1	- none -	3.A.1	ABC			M00207,	Putative multiple sugar transport system;	Structural complex;	Environmental information processing;	Saccharide, polyol, and lipid transport system;
fig|6666666.214148.peg.1111	MM4TEC2__C2_L=1925355=	1155182+905				GH130	K02026	multiple sugar transport system permease protein		COG0395	G	Binding-protein-dependent transport systems inner membrane component	N-acetyl-D-glucosamine_0	Virulence	N-acetyl-D-glucosamine ABC transporter, permease protein 2					Sugar ABC transporter, permease protein	- none -	3.A.1	ABC
fig|6666666.214148.peg.1112	MM4TEC2__C2_L=1925355=	1156122+1817								ENOG410YUDY	S	NA									- none -
fig|6666666.214148.peg.1113	MM4TEC2__C2_L=1925355=	1157950+1844								ENOG410YUDY	S	NA									- none -
fig|6666666.214148.peg.1114	MM4TEC2__C2_L=1925355=	1159784+1307								ENOG410XSKH	Q	Acetyl xylan esterase (AXE1)									- none -
fig|6666666.214148.peg.1115	MM4TEC2__C2_L=1925355=	1161137+2579																			- none -
fig|6666666.214148.peg.1116	MM4TEC2__C2_L=1925355=	1163874+2495			PlantCW	GH78	K05989	alpha-L-rhamnosidase	EC:3.2.1.40	ENOG410XNWE	S	K05989 alpha-L-rhamnosidase EC 3.2.1.40							EC 3.2.1.40	Alfa-L-rhamnosidase	- none -
fig|6666666.214148.peg.1117	MM4TEC2__C2_L=1925355=	1166388+1199								ENOG4112B6F	S	NA									- none -
fig|6666666.214148.peg.1118	MM4TEC2__C2_L=1925355=	1167677+1229								ENOG410XPEF	S	transcriptional regulator protein-like protein									- none -
fig|6666666.214148.peg.1119	MM4TEC2__C2_L=1925355=	1168903+911								ENOG410Z69R	S	NA									- none -
fig|6666666.214148.peg.112	MM4TEC2__C2_L=1925355=	60763-686					K01560	2-haloacid dehalogenase	EC:3.8.1.2	COG1011	S	Hydrolase							EC 3.1.3.5	5&#39;-nucleotidase YjjG	Housecleaning nucleoside triphosphate pyrophosphatases
fig|6666666.214148.peg.1120	MM4TEC2__C2_L=1925355=	1169904+164																			- none -
fig|6666666.214148.peg.1121	MM4TEC2__C2_L=1925355=	1170109+158																			- none -
fig|6666666.214148.peg.1122	MM4TEC2__C2_L=1925355=	1170269+1100								COG0330	O	Band 7 protein								Putative stomatin/prohibitin-family membrane protease subunit PA4582	- none -	1.A.6	ENaC/P2X
fig|6666666.214148.peg.1123	MM4TEC2__C2_L=1925355=	1171382+1202								COG1690	S	Catalytic subunit of the tRNA-splicing ligase complex that acts by directly joining spliced tRNA halves to mature-sized tRNAs by incorporating the precursor-derived splice junction phosphate into the mature tRNA as a canonical 3',5'- phosphodiester. May act as a RNA ligase with broad substrate specificity, and may function toward other RNAs (By similarity)								RNA-2&#39;,3&#39;-PO4:RNA-5&#39;-OH ligase	RNA 3&#39;-terminal phosphate cyclase
fig|6666666.214148.peg.1124	MM4TEC2__C2_L=1925355=	1173649-1016					K01599	uroporphyrinogen decarboxylase	EC:4.1.1.37	COG0407	H	Catalyzes the decarboxylation of four acetate groups of uroporphyrinogen-III to yield coproporphyrinogen-III (By similarity)									- none -					M00121,	Heme biosynthesis, glutamate => protoheme/siroheme;	Pathway module;	Nucleotide and amino acid metabolism;	Cofactor and vitamin biosynthesis;
fig|6666666.214148.peg.1125	MM4TEC2__C2_L=1925355=	1173911+2222			PlantCW,AnimalCarb	GH3	K05349	beta-glucosidase	EC:3.2.1.21	COG1472	G	hydrolase family 3	Periplasmic_0	Virulence	Periplasmic beta-glucosidase (EC 3.2.1.21)				EC 3.2.1.21	beta-glucosidase	- none -
fig|6666666.214148.peg.1126	MM4TEC2__C2_L=1925355=	1176138+1448					K10200	N-acetylglucosamine transport system substrate-binding protein		ENOG410XR78	G	solute-binding protein									- none -					M00205,	N-Acetylglucosamine transport system;	Structural complex;	Environmental information processing;	Saccharide, polyol, and lipid transport system;
fig|6666666.214148.peg.1127	MM4TEC2__C2_L=1925355=	1177601+947					K02025	multiple sugar transport system permease protein		COG1175	P	binding-protein-dependent transport systems inner membrane Component	N-acetyl-D-glucosamine_0	Virulence	N-acetyl-D-glucosamine ABC transporter, permease protein 1						- none -	3.A.1	ABC			M00207,	Putative multiple sugar transport system;	Structural complex;	Environmental information processing;	Saccharide, polyol, and lipid transport system;
fig|6666666.214148.peg.1128	MM4TEC2__C2_L=1925355=	1178592+2087																			- none -
fig|6666666.214148.peg.1129	MM4TEC2__C2_L=1925355=	1180693+2426																			- none -
fig|6666666.214148.peg.113	MM4TEC2__C2_L=1925355=	63151-2384					K03657	DNA helicase II / ATP-dependent DNA helicase PcrA	EC:3.6.4.12	COG3973	L	Helicase									- none -
fig|6666666.214148.peg.1130	MM4TEC2__C2_L=1925355=	1183147+881				GH130	K10119	raffinose/stachyose/melibiose transport system permease protein		COG0395	G	Binding-protein-dependent transport systems inner membrane component	Maltodextrin_0	Virulence	Maltodextrin ABC transporter, permease protein MdxG						- none -	3.A.1	ABC			M00196,	Raffinose/stachyose/melibiose transport system;	Structural complex;	Environmental information processing;	Saccharide, polyol, and lipid transport system;
fig|6666666.214148.peg.1131	MM4TEC2__C2_L=1925355=	1184028+1247																			- none -
fig|6666666.214148.peg.1132	MM4TEC2__C2_L=1925355=	1185284+1355																			- none -
fig|6666666.214148.peg.1133	MM4TEC2__C2_L=1925355=	1186650+1055					K02103	GntR family transcriptional regulator, arabinose operon transcriptional repressor		COG1609	K	Transcriptional regulator									- none -
fig|6666666.214148.peg.1134	MM4TEC2__C2_L=1925355=	1187726+2774				GH0				ENOG410XT3T	S	hydrolase family 2, sugar binding									- none -
fig|6666666.214148.peg.1135	MM4TEC2__C2_L=1925355=	1190490+980					K10804	acyl-CoA thioesterase I [EC:3.1.2.- 3.1.1.5]		ENOG410XNSE	S	NA									- none -
fig|6666666.214148.peg.1136	MM4TEC2__C2_L=1925355=	1191482+1010								ENOG41101Z7	S	Uroporphyrinogen decarboxylase (URO-D)									- none -
fig|6666666.214148.peg.1137	MM4TEC2__C2_L=1925355=	1192510+1244								ENOG410XSKH	Q	Acetyl xylan esterase (AXE1)									- none -
fig|6666666.214148.peg.1138	MM4TEC2__C2_L=1925355=	1194502+896								ENOG4111JFU	S	NA									- none -
fig|6666666.214148.peg.1139	MM4TEC2__C2_L=1925355=	1195415+251																			- none -
fig|6666666.214148.peg.114	MM4TEC2__C2_L=1925355=	64389-1037								COG2320	S	dephospho-CoA kinase protein folding accessory domain-containing protein									- none -
fig|6666666.214148.peg.1140	MM4TEC2__C2_L=1925355=	1196879-1175								COG0426	C	domain protein								rubredoxin-oxygen oxidoreductase	Rubrerythrin
fig|6666666.214148.peg.1141	MM4TEC2__C2_L=1925355=	1196921+176																			- none -
fig|6666666.214148.peg.1142	MM4TEC2__C2_L=1925355=	1197149+161																		LSU ribosomal protein L33p @ LSU ribosomal protein L33p, zinc-dependent	Ribosome LSU bacterial;Ribosome LSU bacterial
fig|6666666.214148.peg.1143	MM4TEC2__C2_L=1925355=	1197365+233																		Protein translocase subunit SecE	- none -
fig|6666666.214148.peg.1144	MM4TEC2__C2_L=1925355=	1197614+554					K02601	transcriptional antiterminator NusG		COG0250	K	Participates in transcription elongation, termination and antitermination (By similarity)								Transcription antitermination protein NusG	Transcription factors bacterial
fig|6666666.214148.peg.1145	MM4TEC2__C2_L=1925355=	1198259+425					K02867	large subunit ribosomal protein L11		COG0080	J	This protein binds directly to 23S ribosomal RNA (By similarity)								LSU ribosomal protein L11p (L12e)	Ribosome LSU bacterial					M00179,M00178,	Ribosome, archaea;Ribosome, bacteria;	Structural complex;	Genetic information processing;	Ribosome;
fig|6666666.214148.peg.1146	MM4TEC2__C2_L=1925355=	1198740+689					K02863	large subunit ribosomal protein L1		COG0081	J	Binds directly to 23S rRNA. The L1 stalk is quite mobile in the ribosome, and is involved in E site tRNA release (By similarity)								LSU ribosomal protein L1p (L10Ae)	Ribosome LSU bacterial	1.C.82	1.C.82			M00179,M00178,	Ribosome, archaea;Ribosome, bacteria;	Structural complex;	Genetic information processing;	Ribosome;
fig|6666666.214148.peg.1147	MM4TEC2__C2_L=1925355=	1199633+521					K02864	large subunit ribosomal protein L10		COG0244	J	50s ribosomal protein L10								LSU ribosomal protein L10p (P0)	Ribosome LSU bacterial					M00179,M00178,	Ribosome, archaea;Ribosome, bacteria;	Structural complex;	Genetic information processing;	Ribosome;
fig|6666666.214148.peg.1148	MM4TEC2__C2_L=1925355=	1200202+371					K02935	large subunit ribosomal protein L7/L12		COG0222	J	Seems to be the binding site for several of the factors involved in protein synthesis and appears to be essential for accurate translation (By similarity)								LSU ribosomal protein L7/L12 (P1/P2)	Ribosome LSU bacterial					M00178,	Ribosome, bacteria;	Structural complex;	Genetic information processing;	Ribosome;
fig|6666666.214148.peg.1149	MM4TEC2__C2_L=1925355=	1200785+902																			- none -
fig|6666666.214148.peg.115	MM4TEC2__C2_L=1925355=	65746-1298					K01951	GMP synthase (glutamine-hydrolysing)	EC:6.3.5.2	COG0519	F	Catalyzes the synthesis of GMP from XMP (By similarity)	guaA	Cellular metabolism	GMP synthase [glutamine-hydrolyzing], amidotransferase subunit (EC 6.3.5.2) GMP synthase [glutamine-hydrolyzing], ATP pyrophosphatase subunit (EC 6.3.5.2)				EC 6.3.5.2	GMP synthase [glutamine-hydrolyzing], amidotransferase subunit / GMP synthase [glutamine-hydrolyzing], ATP pyrophosphatase subunit	GMP synthase;GMP synthase; <br>Purine conversions; <br>Purine conversions; <br>Purine salvage cluster; <br>Purine salvage cluster					M00050,	Guanine ribonucleotide biosynthesis IMP => GDP,GTP;	Pathway module;	Nucleotide and amino acid metabolism;	Purine metabolism;
fig|6666666.214148.peg.1150	MM4TEC2__C2_L=1925355=	1202473-734					K06973	uncharacterized protein		COG2738	S	Putative neutral zinc metallopeptidase								probable metal-dependent peptidase	- none -
fig|6666666.214148.peg.1151	MM4TEC2__C2_L=1925355=	1203486-947																			- none -
fig|6666666.214148.peg.1152	MM4TEC2__C2_L=1925355=	1203576+641																			- none -
fig|6666666.214148.peg.1153	MM4TEC2__C2_L=1925355=	1204284+221																			- none -
fig|6666666.214148.peg.1154	MM4TEC2__C2_L=1925355=	1204676+434					K07447	putative holliday junction resolvase [EC:3.1.-.-]		COG0816	L	Could be a nuclease that resolves Holliday junction intermediates in genetic recombination (By similarity)								Putative Holliday junction resolvase YqgF	- none -
fig|6666666.214148.peg.1155	MM4TEC2__C2_L=1925355=	1205107+401																			- none -
fig|6666666.214148.peg.1156	MM4TEC2__C2_L=1925355=	1205746+779					K02967	small subunit ribosomal protein S2		COG0052	J	30S ribosomal protein S2								SSU ribosomal protein S2p (SAe)	CBSS-312309.3.peg.1965;Ribosome recycling related cluster					M00179,M00178,	Ribosome, archaea;Ribosome, bacteria;	Structural complex;	Genetic information processing;	Ribosome;
fig|6666666.214148.peg.1157	MM4TEC2__C2_L=1925355=	1206560+659					K02357	elongation factor Ts		COG0264	J	Associates with the EF-Tu.GDP complex and induces the exchange of GDP to GTP. It remains bound to the aminoacyl-tRNA.EF- Tu.GTP complex up to the GTP hydrolysis stage on the ribosome (By similarity)								Translation elongation factor Ts	CBSS-312309.3.peg.1965;Ribosome recycling related cluster; <br>Translation elongation factors bacterial
fig|6666666.214148.peg.1158	MM4TEC2__C2_L=1925355=	1207285+725					K09903	uridylate kinase	EC:2.7.4.22	COG0528	F	UMP kinase activity							EC 2.7.4.22	Uridine monophosphate kinase	CBSS-312309.3.peg.1965;Ribosome recycling related cluster
fig|6666666.214148.peg.1159	MM4TEC2__C2_L=1925355=	1208026+572					K02838	ribosome recycling factor		COG0233	J	Responsible for the release of ribosomes from messenger RNA at the termination of protein biosynthesis. May increase the efficiency of translation by recycling ribosomes from one round of translation to another (By similarity)								Ribosome recycling factor	Ribosome recycling related cluster;Translation termination factors bacterial
fig|6666666.214148.peg.116	MM4TEC2__C2_L=1925355=	66946-1190								ENOG410Y085	S	F420-0:Gamma-glutamyl ligase								Transcriptional regulators	- none -
fig|6666666.214148.peg.1160	MM4TEC2__C2_L=1925355=	1208609+698					K00806	undecaprenyl diphosphate synthase	EC:2.5.1.31	COG0020	I	Catalyzes the condensation of isopentenyl diphosphate (IPP) with allylic pyrophosphates generating different type of terpenoids (By similarity)				Capsule	Antiphagocytosis|Serum resistance	undecaprenyl diphosphate synthase	EC 2.5.1.31	Undecaprenyl diphosphate synthase	CBSS-83331.1.peg.3039;Isoprenoinds for Quinones; <br>Polyprenyl Diphosphate Biosynthesis
fig|6666666.214148.peg.1161	MM4TEC2__C2_L=1925355=	1209312+884					K00981	phosphatidate cytidylyltransferase	EC:2.7.7.41	COG0575	I	phosphatidate Cytidylyltransferase	Phosphatidate_0	Virulence	Phosphatidate cytidylyltransferase (EC 2.7.7.41)	Capsule	Antiphagocytosis|Serum resistance	phosphatidate cytidylyltransferase	EC 2.7.7.41	Phosphatidate cytidylyltransferase	Glycerolipid and Glycerophospholipid Metabolism in Bacteria
fig|6666666.214148.peg.1162	MM4TEC2__C2_L=1925355=	1210270+1148					K00099	1-deoxy-D-xylulose-5-phosphate reductoisomerase	EC:1.1.1.267	COG0743	I	Catalyzes the NADP-dependent rearrangement and reduction of 1-deoxy-D-xylulose-5-phosphate (DXP) to 2-C-methyl-D-erythritol 4-phosphate (MEP) (By similarity)							EC 1.1.1.267	1-deoxy-D-xylulose 5-phosphate reductoisomerase	CBSS-83331.1.peg.3039					M00096,	C5 isoprenoid biosynthesis, non-mevalonate pathway;	Pathway module;	Carbohydrate and lipid metabolism;	Terpenoid backbone biosynthesis;
fig|6666666.214148.peg.1163	MM4TEC2__C2_L=1925355=	1211422+1148					K11749	regulator of sigma E protease [EC:3.4.24.-]		COG0750	M	Membrane-associated zinc metalloprotease								Intramembrane protease RasP/YluC, implicated in cell division based on FtsL cleavage	CBSS-83331.1.peg.3039;Periplasmic Stress Response	9.B.149	9.B.149
fig|6666666.214148.peg.1164	MM4TEC2__C2_L=1925355=	1213738-1124					K16789	thiamine transporter		COG3859	S	Proton-coupled thiamine transporter YuaJ	Substrate-specific_0	Cellular metabolism	Substrate-specific component ThiT of thiamin ECF transporter					Substrate-specific component ThiT of thiamin ECF transporter	ECF class transporters;Thiamin biosynthesis	2.A.88	2.A.88
fig|6666666.214148.peg.1165	MM4TEC2__C2_L=1925355=	1213967+584					K08722	5'-deoxynucleotidase	EC:3.1.3.89	COG1896	S	Metal Dependent Phosphohydrolase							EC 3.1.3.89	5&#39;-deoxynucleotidase YfbR	- none -
fig|6666666.214148.peg.1166	MM4TEC2__C2_L=1925355=	1214548+329								ENOG4111RHN	S	NA									- none -
fig|6666666.214148.peg.1167	MM4TEC2__C2_L=1925355=	1214930+149																			- none -
fig|6666666.214148.peg.1168	MM4TEC2__C2_L=1925355=	1215398+134																			- none -
fig|6666666.214148.peg.1169	MM4TEC2__C2_L=1925355=	1216881-1346								ENOG41125IU	S	Germination protein, Ger(X)C family									- none -
fig|6666666.214148.peg.117	MM4TEC2__C2_L=1925355=	68287-1154					K03151	thiamine biosynthesis protein ThiI		COG0301	H	Catalyzes the ATP-dependent transfer of a sulfur to tRNA to produce 4-thiouridine in position 8 of tRNAs, which functions as a near-UV photosensor. Also catalyzes the transfer of sulfur to the sulfur carrier protein ThiS, forming ThiS-thiocarboxylate. This is a step in the synthesis of thiazole, in the thiamine biosynthesis pathway. The sulfur is donated as persulfide by IscS (By similarity)							EC 2.8.1.4	tRNA 4-thiouridine synthase	- none -
fig|6666666.214148.peg.1170	MM4TEC2__C2_L=1925355=	1217945-1067																			- none -
fig|6666666.214148.peg.1171	MM4TEC2__C2_L=1925355=	1219413-1460					K06295	spore germination protein KA		ENOG410XNMP	S	Spore germination protein								Nutrient germinant receptor inner membrane subunit A (GerKA/GerAA/GerBA)	- none -	9.A.11	9.A.11
fig|6666666.214148.peg.1172	MM4TEC2__C2_L=1925355=	1220021-518																			- none -
fig|6666666.214148.peg.1173	MM4TEC2__C2_L=1925355=	1220204-179																			- none -
fig|6666666.214148.peg.1174	MM4TEC2__C2_L=1925355=	1222567-2318								COG2208	T	protein serine threonine phosphatase							EC 3.6.3.3;EC 3.6.3.5;EC 3.6.3.4	Lead, cadmium, zinc and mercury transporting ATPase ; Copper-translocating P-type ATPase	Copper Transport System;Copper homeostasis
fig|6666666.214148.peg.1175	MM4TEC2__C2_L=1925355=	1222907-239																			- none -
fig|6666666.214148.peg.1176	MM4TEC2__C2_L=1925355=	1223175-278																			- none -
fig|6666666.214148.peg.1177	MM4TEC2__C2_L=1925355=	1223266+218																			- none -
fig|6666666.214148.peg.1178	MM4TEC2__C2_L=1925355=	1225391-1868					K03495	tRNA uridine 5-carboxymethylaminomethyl modification enzyme		COG0445	D	NAD-binding protein involved in the addition of a carboxymethylaminomethyl (cmnm) group at the wobble position (U34) of certain tRNAs, forming tRNA-cmnm(5)s(2)U34 (By similarity)								tRNA uridine 5-carboxymethylaminomethyl modification enzyme GidA	RNA modification and chromosome partitioning cluster
fig|6666666.214148.peg.1179	MM4TEC2__C2_L=1925355=	1226801-1355					K02313	chromosomal replication initiator protein		COG0593	L	it binds specifically double-stranded DNA at a 9 bp consensus (dnaA box) 5'-TTATC CA A CA A-3'. DnaA binds to ATP and to acidic phospholipids (By similarity)								Chromosomal replication initiator protein DnaA	- none -
fig|6666666.214148.peg.118	MM4TEC2__C2_L=1925355=	69412-1121					K04487	cysteine desulfurase	EC:2.8.1.7	COG1104	E	cysteine desulfurase							EC 2.8.1.7	Cysteine desulfurase	Alanine biosynthesis;CBSS-84588.1.peg.1247
fig|6666666.214148.peg.1180	MM4TEC2__C2_L=1925355=	1226917-116																			- none -
fig|6666666.214148.peg.1181	MM4TEC2__C2_L=1925355=	1226916+1097					K03629	DNA replication and repair protein RecF		COG1195	L	it is required for DNA replication and normal SOS inducibility. RecF binds preferentially to single-stranded, linear DNA. It also seems to bind ATP (By similarity)								DNA recombination and repair protein RecF	- none -
fig|6666666.214148.peg.1182	MM4TEC2__C2_L=1925355=	1228434-221																			- none -
fig|6666666.214148.peg.1183	MM4TEC2__C2_L=1925355=	1228513+548																			- none -
fig|6666666.214148.peg.1184	MM4TEC2__C2_L=1925355=	1229087+1307								COG2720	V	VanW family								Vancomycin B-type resistance protein VanW	Resistance to Vancomycin
fig|6666666.214148.peg.1185	MM4TEC2__C2_L=1925355=	1230452+1127								ENOG410XRNH	S	NA									- none -
fig|6666666.214148.peg.1186	MM4TEC2__C2_L=1925355=	1231712+1382					K01893	asparaginyl-tRNA synthetase	EC:6.1.1.22	COG0017	J	asparaginyl-tRNA synthetase							EC 6.1.1.22	Asparaginyl-tRNA synthetase	tRNA aminoacylation, Asp and Asn					M00359,	Aminoacyl-tRNA biosynthesis, eukaryotes;	Functional set;	Metabolism;	Aminoacyl tRNA;
fig|6666666.214148.peg.1187	MM4TEC2__C2_L=1925355=	1233103+1058					K03621	glycerol-3-phosphate acyltransferase PlsX	EC:2.3.1.15	COG0416	I	Catalyzes the reversible formation of acyl-phosphate (acyl-PO(4)) from acyl- acyl-carrier-protein (acyl-ACP). This enzyme utilizes acyl-ACP as fatty acyl donor, but not acyl-CoA (By similarity)								Phosphate:acyl-ACP acyltransferase PlsX (EC 2.3.1.n2)	- none -
fig|6666666.214148.peg.1188	MM4TEC2__C2_L=1925355=	1234151+674					K03685	ribonuclease III	EC:3.1.26.3	COG0571	K	Digests double-stranded RNA. Involved in the processing of primary rRNA transcript to yield the immediate precursors to the large and small rRNAs (23S and 16S). Also processes some mRNAs, and tRNAs when they are encoded in the rRNA operon (By similarity)							EC 3.1.26.3	Ribonuclease III	RNA processing and degradation, bacterial
fig|6666666.214148.peg.1189	MM4TEC2__C2_L=1925355=	1234822+3596					K03529	chromosome segregation protein		COG1196	D	Required for chromosome condensation and partitioning (By similarity)								Chromosome partition protein smc	- none -
fig|6666666.214148.peg.119	MM4TEC2__C2_L=1925355=	70011-602																			- none -
fig|6666666.214148.peg.1190	MM4TEC2__C2_L=1925355=	1238445+896					K03110	fused signal recognition particle receptor		COG0552	U	Involved in targeting and insertion of nascent membrane proteins into the cytoplasmic membrane. Acts as a receptor for the complex formed by the signal recognition particle (SRP) and the ribosome-nascent chain (RNC)	Signal_0	Virulence	Signal recognition particle receptor FtsY	Polar flagella	Motility|Colonization	flagellar biosynthesis protein FlhF		Signal recognition particle receptor FtsY	- none -	3.A.5	3.A.5			M00335,	Sec (secretion) system;	Structural complex;	Environmental information processing;	Bacterial secretion system;
fig|6666666.214148.peg.1191	MM4TEC2__C2_L=1925355=	1239351+119																			- none -
fig|6666666.214148.peg.1192	MM4TEC2__C2_L=1925355=	1239485+560								ENOG411271X	S	NA									- none -
fig|6666666.214148.peg.1193	MM4TEC2__C2_L=1925355=	1240067+428					K09787	uncharacterized protein		COG2739	S	Might take part in the signal recognition particle (SRP) pathway. This is inferred from the conservation of its genetic proximity to ftsY ffh. May be a regulatory protein (By similarity)									- none -
fig|6666666.214148.peg.1194	MM4TEC2__C2_L=1925355=	1240506+1319					K03106	signal recognition particle subunit SRP54		COG0541	U	Involved in targeting and insertion of nascent membrane proteins into the cytoplasmic membrane. Binds to the hydrophobic signal sequence of the ribosome-nascent chain (RNC) as it emerges from the ribosomes. The SRP-RNC complex is then targeted to the cytoplasmic membrane where it interacts with the SRP receptor FtsY	Signal_0	Virulence	Signal recognition particle receptor FtsY					Signal recognition particle protein Ffh	- none -	3.A.5	3.A.5
fig|6666666.214148.peg.1195	MM4TEC2__C2_L=1925355=	1241856+293					K02959	small subunit ribosomal protein S16		COG0228	J	30s ribosomal protein S16								SSU ribosomal protein S16p	KH domain RNA binding protein YlqC					M00178,	Ribosome, bacteria;	Structural complex;	Genetic information processing;	Ribosome;
fig|6666666.214148.peg.1196	MM4TEC2__C2_L=1925355=	1242166+245					K06960	uncharacterized protein		COG1837	S	UPF0109 protein								KH domain RNA binding protein YlqC	KH domain RNA binding protein YlqC
fig|6666666.214148.peg.1197	MM4TEC2__C2_L=1925355=	1242444+506					K02860	16S rRNA processing protein RimM		COG0806	J	An accessory protein needed during the final step in the assembly of 30S ribosomal subunit, possibly for assembly of the head region. Probably interacts with S19. Essential for efficient processing of 16S rRNA. May be needed both before and after RbfA during the maturation of 16S rRNA. It has affinity for free ribosomal 30S subunits but not for 70S ribosomes (By similarity)									- none -
fig|6666666.214148.peg.1198	MM4TEC2__C2_L=1925355=	1242956+680					K00554	tRNA (guanine37-N1)-methyltransferase	EC:2.1.1.228	COG0336	J	Specifically methylates guanosine-37 in various tRNAs (By similarity)							EC 2.1.1.228	tRNA (guanine(37)-N(1))-methyltransferase	- none -
fig|6666666.214148.peg.1199	MM4TEC2__C2_L=1925355=	1243642+353								ENOG4111KEY	S	NA									- none -
fig|6666666.214148.peg.12	MM4TEC2__C1_L=46754=	9609+1055																			- none -
fig|6666666.214148.peg.120	MM4TEC2__C2_L=1925355=	74073-4046					K01955	carbamoyl-phosphate synthase large subunit	EC:6.3.5.5	COG0458	F	carbamoyl-phosphate synthetase ammonia chain	Carbamoyl-phosphate_0	Virulence	Carbamoyl-phosphate synthase large chain (EC 6.3.5.5)				EC 6.3.5.5	Carbamoyl-phosphate synthase large chain	De Novo Pyrimidine Synthesis					M00051,	Uridine monophosphate biosynthesis, glutamine (+ PRPP) => UMP;	Pathway module;	Nucleotide and amino acid metabolism;	Pyrimidine metabolism;
fig|6666666.214148.peg.1200	MM4TEC2__C2_L=1925355=	1244085+860					K14540	ribosome biogenesis GTPase A		COG1161	S	Required for a late step of 50S ribosomal subunit assembly. Has GTPase activity (By similarity)								50S ribosomal subunit maturation GTPase RbgA (B. subtilis YlqF)	- none -
fig|6666666.214148.peg.1201	MM4TEC2__C2_L=1925355=	1244947+653					K03470	ribonuclease HII	EC:3.1.26.4	COG0164	L	Endonuclease that specifically degrades the RNA of RNA- DNA hybrids (By similarity)	rnhB	Regulation of gene expression	Ribonuclease HII (EC 3.1.26.4)				EC 3.1.26.4	Ribonuclease HII	Ribonuclease H;Ribonucleases in Bacillus
fig|6666666.214148.peg.1202	MM4TEC2__C2_L=1925355=	1245660+227					K07460	putative endonuclease		COG0792	L	UPF0102 protein									- none -
fig|6666666.214148.peg.1203	MM4TEC2__C2_L=1925355=	1245994+344					K02884	large subunit ribosomal protein L19		COG0335	J	This protein is located at the 30S-50S ribosomal subunit interface and may play a role in the structure and function of the aminoacyl-tRNA binding site (By similarity)								LSU ribosomal protein L19p	Ribosome LSU bacterial					M00178,	Ribosome, bacteria;	Structural complex;	Genetic information processing;	Ribosome;
fig|6666666.214148.peg.1204	MM4TEC2__C2_L=1925355=	1246470+2150																			- none -
fig|6666666.214148.peg.1205	MM4TEC2__C2_L=1925355=	1248706+353																		MG(2+) CHELATASE FAMILY PROTEIN / ComM-related protein	- none -
fig|6666666.214148.peg.1206	MM4TEC2__C2_L=1925355=	1249191+1040					K07391	magnesium chelatase family protein		COG0606	O	Mg chelatase subunit ChlI								MG(2+) CHELATASE FAMILY PROTEIN / ComM-related protein	- none -
fig|6666666.214148.peg.1207	MM4TEC2__C2_L=1925355=	1250283+1058					K04096	DNA processing protein		COG0758	L	DNA protecting protein DprA								Rossmann fold nucleotide-binding protein Smf possibly involved in DNA uptake	CBSS-272943.3.peg.1367	3.A.11	3.A.11
fig|6666666.214148.peg.1208	MM4TEC2__C2_L=1925355=	1251362+2303					K03168	DNA topoisomerase I	EC:5.99.1.2	COG0551	L	DNA topoisomerase type I activity							EC 5.99.1.2	DNA topoisomerase I	CBSS-272943.3.peg.1367;DNA topoisomerases, Type I, ATP-independent	3.A.7	3.A.7
fig|6666666.214148.peg.1209	MM4TEC2__C2_L=1925355=	1253658+1316					K04094	methylenetetrahydrofolate--tRNA-(uracil-5-)-methyltransferase	EC:2.1.1.74	COG1206	J	Catalyzes the folate-dependent formation of 5-methyl- uridine at position 54 (M-5-U54) in all tRNAs (By similarity)							EC 2.1.1.74	Methylenetetrahydrofolate--tRNA-(uracil-5-)-methyltransferase TrmFO	- none -
fig|6666666.214148.peg.121	MM4TEC2__C2_L=1925355=	75145-1079					K01956	carbamoyl-phosphate synthase small subunit	EC:6.3.5.5	COG0505	F	carbamoyl-phosphate synthetase glutamine chain	Carbamoyl-phosphate_0	Virulence	Carbamoyl-phosphate synthase small chain (EC 6.3.5.5)				EC 6.3.5.5	Carbamoyl-phosphate synthase small chain	De Novo Pyrimidine Synthesis					M00051,	Uridine monophosphate biosynthesis, glutamine (+ PRPP) => UMP;	Pathway module;	Nucleotide and amino acid metabolism;	Pyrimidine metabolism;
fig|6666666.214148.peg.1210	MM4TEC2__C2_L=1925355=	1254986+536					K01419	ATP-dependent HslUV protease, peptidase subunit HslV	EC:3.4.25.2	COG5405	O	Protease subunit of a proteasome-like degradation complex believed to be a general protein degrading machinery (By similarity)								ATP-dependent protease HslV (EC 3.4.25.-)	Proteasome bacterial;Proteolysis in bacteria, ATP-dependent
fig|6666666.214148.peg.1211	MM4TEC2__C2_L=1925355=	1255543+1310					K03667	ATP-dependent HslUV protease ATP-binding subunit HslU		COG1220	O	this subunit has chaperone activity. The binding of ATP and its subsequent hydrolysis by HslU are essential for unfolding of protein substrates subsequently hydrolyzed by HslV. HslU recognizes the N-terminal part of its protein substrates and unfolds these before they are guided to HslV for hydrolysis (By similarity)								ATP-dependent hsl protease ATP-binding subunit HslU	Proteasome bacterial;Proteolysis in bacteria, ATP-dependent
fig|6666666.214148.peg.1212	MM4TEC2__C2_L=1925355=	1256867+437					K03803	sigma-E factor negative regulatory protein RseC		ENOG41123KF	T	Positive regulator of sigma E, RseC MucC									- none -
fig|6666666.214148.peg.1213	MM4TEC2__C2_L=1925355=	1257294+314					K03671	thioredoxin 1		COG0526	O	Thioredoxin	Thioredoxin_0	Modulate host immune response	Thioredoxin					Thioredoxin	- none -	3.D.3	3.D.3
fig|6666666.214148.peg.1214	MM4TEC2__C2_L=1925355=	1257758+1250			AlpGlucans	GH13	K00600	glycine hydroxymethyltransferase	EC:2.1.2.1	COG0112	E	Catalyzes the reversible interconversion of serine and glycine with tetrahydrofolate (THF) serving as the one-carbon carrier. This reaction serves as the major source of one-carbon groups required for the biosynthesis of purines, thymidylate, methionine, and other important biomolecules. Also exhibits THF- independent aldolase activity toward beta-hydroxyamino acids, producing glycine and aldehyd…							EC 2.1.2.1	Serine hydroxymethyltransferase	5-FCL-like protein;Glycine Biosynthesis; <br>Serine Biosynthesis					M00140,M00141,	C1-unit interconversion, prokaryotes;C1-unit interconversion, eukaryotes;	Pathway module;	Nucleotide and amino acid metabolism;	Cofactor and vitamin biosynthesis;
fig|6666666.214148.peg.1215	MM4TEC2__C2_L=1925355=	1259288-278																			- none -
fig|6666666.214148.peg.1216	MM4TEC2__C2_L=1925355=	1259673+602								COG3601	S	Membrane								Substrate-specific component RibU of riboflavin ECF transporter	ECF class transporters;Riboflavin, FMN and FAD metabolism	2.A.87	BART
fig|6666666.214148.peg.1217	MM4TEC2__C2_L=1925355=	1260293+413					K06925	tRNA threonylcarbamoyladenosine biosynthesis protein TsaE		COG0802	S	protein family UPF0079, ATPase								TsaE protein, required for threonylcarbamoyladenosine t(6)A37 formation in tRNA	YjeE
fig|6666666.214148.peg.1218	MM4TEC2__C2_L=1925355=	1260703+602					K01409	N6-L-threonylcarbamoyladenine synthase	EC:2.3.1.234	COG1214	O	Peptidase M22 Glycoprotease								TsaB protein, required for threonylcarbamoyladenosine (t(6)A) formation in tRNA	Ribosome biogenesis bacterial;YjeE
fig|6666666.214148.peg.1219	MM4TEC2__C2_L=1925355=	1261302+434					K03789	ribosomal-protein-alanine N-acetyltransferase	EC:2.3.1.128	COG0456	S	acetyltransferase								Ribosomal-protein-S18p-alanine acetyltransferase (EC 2.3.1.-)	Ribosome biogenesis bacterial
fig|6666666.214148.peg.122	MM4TEC2__C2_L=1925355=	76070-902					K00611	ornithine carbamoyltransferase	EC:2.1.3.3	COG0078	E	ornithine carbamoyltransferase							EC 2.1.3.3	Ornithine carbamoyltransferase	Arginine Biosynthesis -- gjo;Arginine Biosynthesis extended; <br>Arginine Deiminase Pathway; <br>Arginine and Ornithine Degradation					M00029,	Urea cycle;	Pathway module;	Nucleotide and amino acid metabolism;	Arginine and proline metabolism;
fig|6666666.214148.peg.1220	MM4TEC2__C2_L=1925355=	1261755+707								COG0596	S	Alpha beta hydrolase									- none -
fig|6666666.214148.peg.1221	MM4TEC2__C2_L=1925355=	1262491+1616					K01929	UDP-N-acetylmuramoyl-tripeptide--D-alanyl-D-alanine ligase	EC:6.3.2.10	COG0770	M	UDP-N-acetylmuramoylalanyl-D-glutamyl-2,6-diaminopimelate-D-alanyl-D-alanine ligase activity							EC 6.3.2.10	UDP-N-acetylmuramoylalanyl-D-glutamyl-2,6-diaminopimelate--D-alanyl-D-alanine ligase	Peptidoglycan biosynthesis--gjo
fig|6666666.214148.peg.1222	MM4TEC2__C2_L=1925355=	1264181+1127					K01921	D-alanine-D-alanine ligase	EC:6.3.2.4	COG1181	M	cell wall formation (By similarity)	ddl	Virulence	D-alanine--D-alanine ligase (EC 6.3.2.4)				EC 6.3.2.4	D-alanine--D-alanine ligase	Peptidoglycan biosynthesis--gjo
fig|6666666.214148.peg.1223	MM4TEC2__C2_L=1925355=	1265365+1208					K00031	isocitrate dehydrogenase	EC:1.1.1.42	COG0538	C	isocitrate dehydrogenase (NADp)							EC 1.1.1.42	Isocitrate dehydrogenase [NADP]	5-FCL-like protein			MF0086,MF0088,	TCA cycle;TCA cycle (Helicobacter pathway);	M00173,M00009,M00010,	Reductive citrate cycle (Arnon-Buchanan cycle);Citrate cycle (TCA cycle, Krebs cycle);Citrate cycle, first carbon oxidation, oxaloacetate => 2-oxoglutarate;	Pathway module;	Energy metabolism;	Carbon fixation Signature;
fig|6666666.214148.peg.1224	MM4TEC2__C2_L=1925355=	1266595+575																			- none -
fig|6666666.214148.peg.1225	MM4TEC2__C2_L=1925355=	1267580+434								COG1396	K	Transcriptional regulator									- none -
fig|6666666.214148.peg.1226	MM4TEC2__C2_L=1925355=	1269032-941					K00611	ornithine carbamoyltransferase	EC:2.1.3.3	COG0078	E	ornithine carbamoyltransferase							EC 2.1.3.3	Ornithine carbamoyltransferase	Arginine Biosynthesis -- gjo;Arginine Biosynthesis extended; <br>Arginine Deiminase Pathway; <br>Arginine and Ornithine Degradation					M00029,	Urea cycle;	Pathway module;	Nucleotide and amino acid metabolism;	Arginine and proline metabolism;
fig|6666666.214148.peg.1227	MM4TEC2__C2_L=1925355=	1269240+1415				GT4	K10112	multiple sugar transport system ATP-binding protein		COG3839	G	(ABC) transporter	Maltodextrin_0	Virulence	Maltodextrin ABC transporter, ATP-binding protein MsmX					Multiple sugar ABC transporter, ATP-binding protein	Maltose and Maltodextrin Utilization	3.A.1	ABC
fig|6666666.214148.peg.1228	MM4TEC2__C2_L=1925355=	1270848+1211								COG1454	C	alcohol dehydrogenase								NADPH-dependent butanol dehydrogenase	- none -
fig|6666666.214148.peg.1229	MM4TEC2__C2_L=1925355=	1272194+869					K07089	uncharacterized protein		ENOG410YANC	S	Protein of unknown function (DUF2899)									- none -	2.A.119	2.A.119
fig|6666666.214148.peg.123	MM4TEC2__C2_L=1925355=	77233-1166				GT2	K00821	acetylornithine/N-succinyldiaminopimelate aminotransferase [EC:2.6.1.11 2.6.1.17]		COG4992	E	Acetylornithine aminotransferase	Adenosylmethionine-8-amino-7-oxononanoate_0	Virulence	Adenosylmethionine-8-amino-7-oxononanoate aminotransferase (EC 2.6.1.62)	Pyoverdine	Iron uptake|Siderophore|Pigment	2,4-diaminobutyrate 4-transaminase	EC 2.6.1.11	Acetylornithine aminotransferase	Arginine Biosynthesis -- gjo;Arginine Biosynthesis extended					M00028,M00016,	Ornithine biosynthesis, glutamate => ornithine;Lysine biosynthesis, succinyl-DAP pathway, aspartate => lysine;	Pathway module;	Nucleotide and amino acid metabolism;	Arginine and proline metabolism;
fig|6666666.214148.peg.1230	MM4TEC2__C2_L=1925355=	1273153+344								ENOG4111UPR	S	Drtgg domain protein								FIG168740: DRTGG domain-containing protein	- none -
fig|6666666.214148.peg.1231	MM4TEC2__C2_L=1925355=	1273499+419								COG2172	T	anti-sigma regulatory factor serine threonine protein kinase								Anti-sigma B factor RsbT	- none -
fig|6666666.214148.peg.1232	MM4TEC2__C2_L=1925355=	1273935+1232								COG4624	C	metallo-sulfur cluster assembly							EC 1.12.7.2	Periplasmic [Fe] hydrogenase	- none -
fig|6666666.214148.peg.1233	MM4TEC2__C2_L=1925355=	1275176+332								ENOG4112531	S	drtgg domain-containing protein									- none -
fig|6666666.214148.peg.1234	MM4TEC2__C2_L=1925355=	1275505+695					K07053	uncharacterized protein		COG0613	S	DNA-directed DNA polymerase activity									- none -
fig|6666666.214148.peg.1235	MM4TEC2__C2_L=1925355=	1276202+842																			- none -
fig|6666666.214148.peg.1236	MM4TEC2__C2_L=1925355=	1277029+158																			- none -
fig|6666666.214148.peg.1237	MM4TEC2__C2_L=1925355=	1277191+1061					K00817	histidinol-phosphate aminotransferase	EC:2.6.1.9	COG0079	E	Imidazole acetol-phosphate transaminase							EC 2.6.1.9	Histidinol-phosphate aminotransferase	Histidine Biosynthesis					M00026,	Histidine biosynthesis, PRPP => histidine;	Pathway module;	Nucleotide and amino acid metabolism;	Histidine metabolism;
fig|6666666.214148.peg.1238	MM4TEC2__C2_L=1925355=	1278301+1142																			- none -
fig|6666666.214148.peg.1239	MM4TEC2__C2_L=1925355=	1279466+800					K02566	NagD protein		COG0647	G	Hydrolase								Hypothetical NagD-like phosphatase	Pyridoxin(Vitamin B6) Degradation Pathway
fig|6666666.214148.peg.124	MM4TEC2__C2_L=1925355=	78222-869					K00930	acetylglutamate kinase	EC:2.7.2.8	COG0548	E	nag kinase							EC 2.7.2.8	Acetylglutamate kinase	Arginine Biosynthesis -- gjo;Arginine Biosynthesis extended					M00028,	Ornithine biosynthesis, glutamate => ornithine;	Pathway module;	Nucleotide and amino acid metabolism;	Arginine and proline metabolism;
fig|6666666.214148.peg.1240	MM4TEC2__C2_L=1925355=	1281696-1388					K01647	citrate synthase	EC:2.3.3.1	COG0372	C	citrate synthase							EC 2.3.3.1	Citrate synthase (si)	- none -			MF0086,MF0088,MF0110,	TCA cycle;TCA cycle (Helicobacter pathway);glyoxylate bypass;	M00009,M00010,	Citrate cycle (TCA cycle, Krebs cycle);Citrate cycle, first carbon oxidation, oxaloacetate => 2-oxoglutarate;	Pathway module;	Carbohydrate and lipid metabolism;	Central carbohydrate metabolism;
fig|6666666.214148.peg.1241	MM4TEC2__C2_L=1925355=	1281810+212																			- none -
fig|6666666.214148.peg.1242	MM4TEC2__C2_L=1925355=	1282029+500					K18330	NADP-reducing hydrogenase subunit HndA	EC:1.12.1.3	COG1905	C	Nadh dehydrogenase							EC 1.12.1.2	NAD-reducing hydrogenase subunit HoxE	- none -	3.D.1	Mrp
fig|6666666.214148.peg.1243	MM4TEC2__C2_L=1925355=	1282529+551								ENOG4111N8X	T	Histidine kinase									- none -
fig|6666666.214148.peg.1244	MM4TEC2__C2_L=1925355=	1283077+365					K17992	NADP-reducing hydrogenase subunit HndB	EC:1.12.1.3	COG3411	C	Ferredoxin								Electron-bifurcating [FeFe]-hydrogenase subunit C (2Fe2S protein)	- none -
fig|6666666.214148.peg.1245	MM4TEC2__C2_L=1925355=	1283458+1790					K18331	NADP-reducing hydrogenase subunit HndC	EC:1.12.1.3	COG1894	C	Nadh dehydrogenase	NADH-ubiquinone_0	Anti-apoptosis	NADH-ubiquinone oxidoreductase chain G (EC 1.6.5.3)					Electron-bifurcating [FeFe]-hydrogenase subunit B (NAD+ reductase, ferredoxin reductase)	- none -	3.D.1	Mrp
fig|6666666.214148.peg.1246	MM4TEC2__C2_L=1925355=	1285265+1730					K18332	NADP-reducing hydrogenase subunit HndD	EC:1.12.1.3	COG4624	C	metallo-sulfur cluster assembly							EC 1.12.7.2	Periplasmic [Fe] hydrogenase large subunit	- none -	3.D.1	Mrp
fig|6666666.214148.peg.1247	MM4TEC2__C2_L=1925355=	1287062+404																			- none -
fig|6666666.214148.peg.1248	MM4TEC2__C2_L=1925355=	1287799-281								ENOG410XUC3	K	Transcriptional regulator									- none -
fig|6666666.214148.peg.1249	MM4TEC2__C2_L=1925355=	1287910+428																			- none -
fig|6666666.214148.peg.125	MM4TEC2__C2_L=1925355=	79449-1214					K00620	glutamate N-acetyltransferase / amino-acid N-acetyltransferase [EC:2.3.1.35 2.3.1.1]		COG1364	E	Catalyzes two activities which are involved in the cyclic version of arginine biosynthesis the synthesis of N- acetylglutamate from glutamate and acetyl-CoA as the acetyl donor, and of ornithine by transacetylation between N(2)-acetylornithine and glutamate (By similarity)	Glutamate_0	Virulence	Glutamate N-acetyltransferase (EC 2.3.1.35) N-acetylglutamate synthase (EC 2.3.1.1)				EC 2.3.1.35;EC 2.3.1.1	Glutamate N-acetyltransferase @ N-acetylglutamate synthase	Arginine Biosynthesis -- gjo;Arginine Biosynthesis -- gjo; <br>Arginine Biosynthesis extended; <br>Arginine Biosynthesis extended					M00028,M00028,	Ornithine biosynthesis, glutamate => ornithine;Ornithine biosynthesis, glutamate => ornithine;	Pathway module;	Nucleotide and amino acid metabolism;	Arginine and proline metabolism;
fig|6666666.214148.peg.1250	MM4TEC2__C2_L=1925355=	1289301-899																			- none -
fig|6666666.214148.peg.1251	MM4TEC2__C2_L=1925355=	1290029-731																			- none -
fig|6666666.214148.peg.1252	MM4TEC2__C2_L=1925355=	1290340-314					K10947	PadR family transcriptional regulator, regulatory protein PadR		COG1695	K	Transcriptional regulator								Transcriptional regulator, PadR family	CBSS-1352.1.peg.856
fig|6666666.214148.peg.1253	MM4TEC2__C2_L=1925355=	1292210-1712																			- none -
fig|6666666.214148.peg.1254	MM4TEC2__C2_L=1925355=	1292574+1040					K02647	carbohydrate diacid regulator		COG2508	K	Transcriptional regulator								Sugar diacid utilization regulator SdaR	- none -
fig|6666666.214148.peg.1255	MM4TEC2__C2_L=1925355=	1293715+389								COG0295	F	cytidine deaminase									- none -
fig|6666666.214148.peg.1256	MM4TEC2__C2_L=1925355=	1294107+1283					K03797	carboxyl-terminal processing protease	EC:3.4.21.102	COG0793	M	protease									- none -
fig|6666666.214148.peg.1257	MM4TEC2__C2_L=1925355=	1295696-254								COG1396	K	Transcriptional regulator									- none -
fig|6666666.214148.peg.1258	MM4TEC2__C2_L=1925355=	1296044-311																			- none -
fig|6666666.214148.peg.1259	MM4TEC2__C2_L=1925355=	1296136+434								ENOG410YRCD	S	NA									- none -
fig|6666666.214148.peg.126	MM4TEC2__C2_L=1925355=	80415-938					K00145	N-acetyl-gamma-glutamyl-phosphate reductase	EC:1.2.1.38	COG0002	E	N-acetylglutamate semialdehyde dehydrogenase	Glutamate_0	Virulence	Glutamate N-acetyltransferase (EC 2.3.1.35) N-acetylglutamate synthase (EC 2.3.1.1)				EC 1.2.1.38	N-acetyl-gamma-glutamyl-phosphate reductase	Arginine Biosynthesis -- gjo;Arginine Biosynthesis extended
fig|6666666.214148.peg.1260	MM4TEC2__C2_L=1925355=	1296575+617																			- none -
fig|6666666.214148.peg.1261	MM4TEC2__C2_L=1925355=	1297518-344																			- none -
fig|6666666.214148.peg.1262	MM4TEC2__C2_L=1925355=	1297598+281																			- none -
fig|6666666.214148.peg.1263	MM4TEC2__C2_L=1925355=	1299059-1124								COG0520	E	cysteine desulfurase							EC 2.8.1.7	Cysteine desulfurase	Alanine biosynthesis;CBSS-84588.1.peg.1247
fig|6666666.214148.peg.1264	MM4TEC2__C2_L=1925355=	1299181+263																			- none -
fig|6666666.214148.peg.1265	MM4TEC2__C2_L=1925355=	1299507+629					K10773	endonuclease III	EC:4.2.99.18	COG0177	L	endonuclease III							EC 4.2.99.18	Endonuclease III	DNA Repair Base Excision
fig|6666666.214148.peg.1266	MM4TEC2__C2_L=1925355=	1300152+1265					K03979	GTPase [EC:3.6.5.-]		COG0536	S	An essential GTPase which binds GTP, GDP and possibly (p)ppGpp with moderate affinity, with high nucleotide exchange rates and a fairly low GTP hydrolysis rate (By similarity). It may play a role in control of the cell cycle, stress response, ribosome biogenesis and in those bacteria that undergo differentiation, in morphogenesis control	GTP-binding_0	Virulence	GTP-binding and nucleic acid-binding protein YchF					GTP-binding protein Obg	CBSS-176279.3.peg.868
fig|6666666.214148.peg.1267	MM4TEC2__C2_L=1925355=	1301432+293					K07574	RNA-binding protein		COG1534	J	Rna-binding protein								FIG004454: RNA binding protein	- none -
fig|6666666.214148.peg.1268	MM4TEC2__C2_L=1925355=	1302522-755																			- none -
fig|6666666.214148.peg.1269	MM4TEC2__C2_L=1925355=	1302633+1136					K00969	nicotinate-nucleotide adenylyltransferase	EC:2.7.7.18	COG1713	H	Metal Dependent Phosphohydrolase							EC 2.7.7.18	Nicotinate-nucleotide adenylyltransferase	NAD and NADP cofactor biosynthesis global					M00115,	NAD biosynthesis, aspartate => NAD;	Pathway module;	Nucleotide and amino acid metabolism;	Cofactor and vitamin biosynthesis;
fig|6666666.214148.peg.127	MM4TEC2__C2_L=1925355=	81704-1223					K01940	argininosuccinate synthase	EC:6.3.4.5	COG0137	E	Citrulline--aspartate ligase							EC 6.3.4.5	Argininosuccinate synthase	Arginine Biosynthesis -- gjo;Arginine Biosynthesis extended					M00029,	Urea cycle;	Pathway module;	Nucleotide and amino acid metabolism;	Arginine and proline metabolism;
fig|6666666.214148.peg.1270	MM4TEC2__C2_L=1925355=	1303766+365					K09710	ribosome-associated protein		COG0799	S	Functions as a ribosomal silencing factor. Interacts with ribosomal protein L14 (rplN), blocking formation of intersubunit bridge B8. Prevents association of the 30S and 50S ribosomal subunits and the formation of functional ribosomes, thus repressing translation (By similarity)	Ribosomal_0	Intracellular survival and replication	Ribosomal silencing factor RsfA					Ribosomal silencing factor RsfA	- none -
fig|6666666.214148.peg.1271	MM4TEC2__C2_L=1925355=	1304403-275																			- none -
fig|6666666.214148.peg.1272	MM4TEC2__C2_L=1925355=	1304494+1277					K00756	pyrimidine-nucleoside phosphorylase	EC:2.4.2.2	COG0213	F	The enzymes which catalyze the reversible phosphorolysis of pyrimidine nucleosides are involved in the degradation of these compounds and in their utilization as carbon and energy sources, or in the rescue of pyrimidine bases for nucleotide synthesis (By similarity)							EC 2.4.2.2	Pyrimidine-nucleoside phosphorylase	Deoxyribose and Deoxynucleoside Catabolism;pyrimidine conversions
fig|6666666.214148.peg.1273	MM4TEC2__C2_L=1925355=	1305782+803					K01619	deoxyribose-phosphate aldolase	EC:4.1.2.4	COG0274	F	Catalyzes a reversible aldol reaction between acetaldehyde and D-glyceraldehyde 3-phosphate to generate 2-deoxy- D-ribose 5-phosphate (By similarity)							EC 4.1.2.4	Deoxyribose-phosphate aldolase	Deoxyribose and Deoxynucleoside Catabolism
fig|6666666.214148.peg.1274	MM4TEC2__C2_L=1925355=	1306758+1067					K03705	heat-inducible transcriptional repressor		COG1420	K	Negative regulator of class I heat shock genes (grpE- dnaK-dnaJ and groELS operons). Prevents heat-shock induction of these operons (By similarity)	Heat-inducible_0	Virulence	Heat-inducible transcription repressor HrcA					Heat-inducible transcription repressor HrcA	GroEL GroES;Heat shock dnaK gene cluster extended
fig|6666666.214148.peg.1275	MM4TEC2__C2_L=1925355=	1307812+557					K03687	molecular chaperone GrpE		COG0576	O	Participates actively in the response to hyperosmotic and heat shock by preventing the aggregation of stress-denatured proteins, in association with DnaK and GrpE. It is the nucleotide exchange factor for DnaK and may function as a thermosensor. Unfolded proteins bind initially to DnaJ								Heat shock protein GrpE	GroEL GroES;Heat shock dnaK gene cluster extended; <br>Protein chaperones
fig|6666666.214148.peg.1276	MM4TEC2__C2_L=1925355=	1308408+1799			AnimalCarb,FungalCarbs	GH19	K04043	molecular chaperone DnaK		COG0443	O	Heat shock protein	Chaperone_0	Virulence	Chaperone protein HscC	MOMP	Adherence	molecular chaperone DnaK		Chaperone protein DnaK	GroEL GroES;Heat shock dnaK gene cluster extended; <br>Protein chaperones	1.A.33	1.A.33
fig|6666666.214148.peg.1277	MM4TEC2__C2_L=1925355=	1310377+1142					K03686	molecular chaperone DnaJ		COG0484	O	ATP binding to DnaK triggers the release of the substrate protein, thus completing the reaction cycle. Several rounds of ATP-dependent interactions between DnaJ, DnaK and GrpE are required for fully efficient folding. Also involved, together with DnaK and GrpE, in the DNA replication of plasmids through activation of initiation proteins (By similarity)								Chaperone protein DnaJ	GroEL GroES;Heat shock dnaK gene cluster extended; <br>Protein chaperones
fig|6666666.214148.peg.1278	MM4TEC2__C2_L=1925355=	1311581+833								ENOG410XPK9	S	membrane									- none -
fig|6666666.214148.peg.1279	MM4TEC2__C2_L=1925355=	1312434+941					K02687	ribosomal protein L11 methyltransferase [EC:2.1.1.-]		COG2264	J	Methylates ribosomal protein L11 (By similarity)								Ribosomal protein L11 methyltransferase (EC 2.1.1.-)	Heat shock dnaK gene cluster extended;Ribosome biogenesis bacterial
fig|6666666.214148.peg.128	MM4TEC2__C2_L=1925355=	82291-410								COG5015	S	pyridoxamine 5'-phosphate									- none -
fig|6666666.214148.peg.1280	MM4TEC2__C2_L=1925355=	1313383+713					K09761	16S rRNA (uracil1498-N3)-methyltransferase	EC:2.1.1.193	COG1385	S	Specifically methylates the N3 position of the uracil ring of uridine 1498 (m3U1498) in 16S rRNA. Acts on the fully assembled 30S ribosomal subunit (By similarity)				Dot/Icm	Secretion system|Type IV secretion system	Dot/Icm type IV secretion system effector	EC 2.1.1.193	16S rRNA (uracil(1498)-N(3))-methyltransferase	- none -
fig|6666666.214148.peg.1281	MM4TEC2__C2_L=1925355=	1314093+1256					K18707	threonylcarbamoyladenosine tRNA methylthiotransferase MtaB	EC:2.8.4.5	COG0621	J	Catalyzes the methylthiolation of N6- (dimethylallyl)adenosine (i(6)A), leading to the formation of 2- methylthio-N6-(dimethylallyl)adenosine (ms(2)i(6)A) at position 37 in tRNAs that read codons beginning with uridine (By similarity)							EC 2.8.4.5	tRNA t(6)A37-methylthiotransferase	- none -
fig|6666666.214148.peg.1282	MM4TEC2__C2_L=1925355=	1315346+350					K02503	histidine triad (HIT) family protein		COG0537	FG	histidine triad (hIT) protein									- none -
fig|6666666.214148.peg.1283	MM4TEC2__C2_L=1925355=	1316207-470																			- none -
fig|6666666.214148.peg.1284	MM4TEC2__C2_L=1925355=	1316289+230																			- none -
fig|6666666.214148.peg.1285	MM4TEC2__C2_L=1925355=	1316626+179																		SSU ribosomal protein S21p	- none -
fig|6666666.214148.peg.1286	MM4TEC2__C2_L=1925355=	1316888+401																			- none -
fig|6666666.214148.peg.1287	MM4TEC2__C2_L=1925355=	1317357+2336					K03657	DNA helicase II / ATP-dependent DNA helicase PcrA	EC:3.6.4.12	COG0210	L	helicase	ATP-dependent_0	Intracellular survival and replication	ATP-dependent DNA helicase UvrDPcrA (EC 3.6.4.12)					ATP-dependent DNA helicase UvrD/PcrA	DNA repair, bacterial UvrD and related helicases
fig|6666666.214148.peg.1288	MM4TEC2__C2_L=1925355=	1319704+1934					K01972	DNA ligase (NAD+)	EC:6.5.1.2	COG0272	L	DNA ligase (NAD+) activity							EC 6.5.1.2	DNA ligase (NAD(+))	- none -
fig|6666666.214148.peg.1289	MM4TEC2__C2_L=1925355=	1321713+875								COG1561	S	YicC domain protein								Protein YicC	- none -
fig|6666666.214148.peg.129	MM4TEC2__C2_L=1925355=	83826-1532					K01951	GMP synthase (glutamine-hydrolysing)	EC:6.3.5.2	COG0519	F	Catalyzes the synthesis of GMP from XMP (By similarity)	GMP_0	Cellular metabolism	GMP synthase [glutamine-hydrolyzing], amidotransferase subunit (EC 6.3.5.2) GMP synthase [glutamine-hydrolyzing], ATP pyrophosphatase subunit (EC 6.3.5.2)				EC 6.3.5.2	GMP synthase [glutamine-hydrolyzing], amidotransferase subunit / GMP synthase [glutamine-hydrolyzing], ATP pyrophosphatase subunit	GMP synthase;GMP synthase; <br>Purine conversions; <br>Purine conversions; <br>Purine salvage cluster; <br>Purine salvage cluster					M00050,	Guanine ribonucleotide biosynthesis IMP => GDP,GTP;	Pathway module;	Nucleotide and amino acid metabolism;	Purine metabolism;
fig|6666666.214148.peg.1290	MM4TEC2__C2_L=1925355=	1322616+221																			- none -
fig|6666666.214148.peg.1291	MM4TEC2__C2_L=1925355=	1322924+2168					K04066	primosomal protein N' (replication factor Y) (superfamily II helicase) [EC:3.6.4.-]		COG1198	L	Primosomal protein n'								Helicase PriA essential for oriC/DnaA-independent DNA replication	- none -	3.A.11	3.A.11
fig|6666666.214148.peg.1292	MM4TEC2__C2_L=1925355=	1325128+458					K01462	peptide deformylase	EC:3.5.1.88	COG0242	J	Removes the formyl group from the N-terminal Met of newly synthesized proteins. Requires at least a dipeptide for an efficient rate of reaction. N-terminal L-methionine is a prerequisite for activity but the enzyme has broad specificity at other positions (By similarity)							EC 3.5.1.88	Peptide deformylase	Translation termination factors bacterial
fig|6666666.214148.peg.1293	MM4TEC2__C2_L=1925355=	1325599+932					K00604	methionyl-tRNA formyltransferase	EC:2.1.2.9	COG0223	J	Modifies the free amino group of the aminoacyl moiety of methionyl-tRNA(fMet). The formyl group appears to play a dual role in the initiator identity of N-formylmethionyl-tRNA by (I) promoting its recognition by IF2 and (II) impairing its binding to EFTu-GTP (By similarity)							EC 2.1.2.9	Methionyl-tRNA formyltransferase	Translation initiation factors bacterial
fig|6666666.214148.peg.1294	MM4TEC2__C2_L=1925355=	1326528+1232					K03500	16S rRNA (cytosine967-C5)-methyltransferase	EC:2.1.1.176	COG0144	J	nOP2 Sun							EC 2.1.1.176	16S rRNA (cytosine(967)-C(5))-methyltransferase	RNA methylation
fig|6666666.214148.peg.1295	MM4TEC2__C2_L=1925355=	1327757+1073					K06941	23S rRNA (adenine2503-C2)-methyltransferase	EC:2.1.1.192	COG0820	J	rRNA (adenine-C2-)-methyltransferase activity							EC 2.1.1.192	23S rRNA (adenine(2503)-C(2))-methyltransferase & tRNA (adenine(37)-C(2))-methyltransferase	- none -
fig|6666666.214148.peg.1296	MM4TEC2__C2_L=1925355=	1328827+659					K01783	ribulose-phosphate 3-epimerase	EC:5.1.3.1	COG0036	G	ribulose-phosphate 3-epimerase activity							EC 5.1.3.1	Ribulose-phosphate 3-epimerase	Pentose phosphate pathway			MF0079,MF0090,	bifidobacterium shunt;pentose phosphate pathway (non-oxidative branch);	M00007,	Pentose phosphate pathway, non-oxidative phase, fructose 6P => ribose 5P;	Pathway module;	Carbohydrate and lipid metabolism;	Central carbohydrate metabolism;
fig|6666666.214148.peg.1297	MM4TEC2__C2_L=1925355=	1329488+611					K00949	thiamine pyrophosphokinase	EC:2.7.6.2	COG1564	H	thiamine diphosphokinase activity							EC 2.7.6.2	Thiamin pyrophosphokinase	Thiamin biosynthesis
fig|6666666.214148.peg.1298	MM4TEC2__C2_L=1925355=	1330273-170																			- none -
fig|6666666.214148.peg.1299	MM4TEC2__C2_L=1925355=	1330468-188					K02902	large subunit ribosomal protein L28		COG0227	J	50s ribosomal protein L28								LSU ribosomal protein L28p @ LSU ribosomal protein L28p, zinc-independent	Ribosome LSU bacterial					M00178,	Ribosome, bacteria;	Structural complex;	Genetic information processing;	Ribosome;
fig|6666666.214148.peg.13	MM4TEC2__C1_L=46754=	10707+539																			- none -
fig|6666666.214148.peg.130	MM4TEC2__C2_L=1925355=	85357-1457					K00088	IMP dehydrogenase	EC:1.1.1.205	COG0517	S	Catalyzes the conversion of inosine 5'-phosphate (IMP) to xanthosine 5'-phosphate (XMP), the first committed and rate- limiting step in the de novo synthesis of guanine nucleotides, and therefore plays an important role in the regulation of cell growth (By similarity)	Inosine-5-monophosphate_0	Cellular metabolism	Inosine-5-monophosphate dehydrogenase (EC 1.1.1.205) CBS domain				EC 1.1.1.205	Inosine-5&#39;-monophosphate dehydrogenase / CBS domain	Purine conversions;Purine salvage cluster					M00050,	Guanine ribonucleotide biosynthesis IMP => GDP,GTP;	Pathway module;	Nucleotide and amino acid metabolism;	Purine metabolism;
fig|6666666.214148.peg.1300	MM4TEC2__C2_L=1925355=	1330536+134																			- none -
fig|6666666.214148.peg.1301	MM4TEC2__C2_L=1925355=	1330692+350								COG1302	S	alkaline shock protein									- none -
fig|6666666.214148.peg.1302	MM4TEC2__C2_L=1925355=	1331075+1643					K07030	uncharacterized protein		COG1461	S	dak2 domain fusion protein ylov								Dihydroxyacetone kinase-like protein, phosphatase domain / Dihydroxyacetone kinase-like protein, kinase domain	- none -
fig|6666666.214148.peg.1303	MM4TEC2__C2_L=1925355=	1332740+2042	mfd	CINOXACIN,CIPROFLOXACIN,CLINAFLOXACIN,CLOFAZIMINE,ENOXACIN,FLEROXACIN,FLUOROQUINOLONE ANTIBIOTIC,GATIFLOXACIN,GREPAFLOXACIN,LEVOFLOXACIN,LOMEFLOXACIN,MOXIFLOXACIN,NALIDIXIC ACID,NORFLOXACIN,OFLOXACIN,PEFLOXACIN,SITAFLOXACIN,SPARFLOXACIN,TROVAFLOXACIN,ALL			K03655	ATP-dependent DNA helicase RecG	EC:3.6.4.12	COG1200	L	ATP-dependent DNA helicase recG							EC 3.6.4.12	ATP-dependent DNA helicase RecG	- none -	3.A.11	3.A.11
fig|6666666.214148.peg.1304	MM4TEC2__C2_L=1925355=	1334847+1172					K02502	ATP phosphoribosyltransferase regulatory subunit		COG3705	E	Required for the first step of histidine biosynthesis. May allow the feedback regulation of ATP phosphoribosyltransferase activity by histidine (By similarity)							EC 2.4.2.17	ATP phosphoribosyltransferase regulatory subunit	Histidine Biosynthesis
fig|6666666.214148.peg.1305	MM4TEC2__C2_L=1925355=	1336016+617					K00765	ATP phosphoribosyltransferase	EC:2.4.2.17	COG0040	E	Catalyzes the condensation of ATP and 5-phosphoribose 1- diphosphate to form N'-(5'-phosphoribosyl)-ATP (PR-ATP). Has a crucial role in the pathway because the rate of histidine biosynthesis seems to be controlled primarily by regulation of HisG enzymatic activity (By similarity)							EC 2.4.2.17	ATP phosphoribosyltransferase	Histidine Biosynthesis					M00026,	Histidine biosynthesis, PRPP => histidine;	Pathway module;	Nucleotide and amino acid metabolism;	Histidine metabolism;
fig|6666666.214148.peg.1306	MM4TEC2__C2_L=1925355=	1336644+1274					K00013	histidinol dehydrogenase	EC:1.1.1.23	COG0141	E	Catalyzes the sequential NAD-dependent oxidations of L- histidinol to L-histidinaldehyde and then to L-histidine (By similarity)							EC 1.1.1.23	Histidinol dehydrogenase	Histidine Biosynthesis					M00026,	Histidine biosynthesis, PRPP => histidine;	Pathway module;	Nucleotide and amino acid metabolism;	Histidine metabolism;
fig|6666666.214148.peg.1307	MM4TEC2__C2_L=1925355=	1337920+575					K01693	imidazoleglycerol-phosphate dehydratase	EC:4.2.1.19	COG0131	E	imidazoleglycerolphosphate dehydratase							EC 4.2.1.19	Imidazoleglycerol-phosphate dehydratase	Histidine Biosynthesis					M00026,	Histidine biosynthesis, PRPP => histidine;	Pathway module;	Nucleotide and amino acid metabolism;	Histidine metabolism;
fig|6666666.214148.peg.1308	MM4TEC2__C2_L=1925355=	1338496+596					K02501	glutamine amidotransferase [EC:2.4.2.-]		COG0118	E	IGPS catalyzes the conversion of PRFAR and glutamine to IGP, AICAR and glutamate. The hisH subunit provides the glutamine amidotransferase activity that produces the ammonia necessary to hisF for the synthesis of IGP and AICAR (By similarity)				LPS	Endotoxin	imidazole glycerol phosphate synthase subunit HisH		Imidazole glycerol phosphate synthase amidotransferase subunit (EC 2.4.2.-)	Histidine Biosynthesis					M00026,	Histidine biosynthesis, PRPP => histidine;	Pathway module;	Nucleotide and amino acid metabolism;	Histidine metabolism;
fig|6666666.214148.peg.1309	MM4TEC2__C2_L=1925355=	1339114+710					K01814	phosphoribosylformimino-5-aminoimidazole carboxamide ribotide isomerase	EC:5.3.1.16	COG0106	E	phosphoribosylformimino-5-aminoimidazole carboxamide ribotide isomerase				LPS	Endotoxin	imidazole glycerol phosphate synthase subunit HisF	EC 5.3.1.16	Phosphoribosylformimino-5-aminoimidazole carboxamide ribotide isomerase	Histidine Biosynthesis					M00026,	Histidine biosynthesis, PRPP => histidine;	Pathway module;	Nucleotide and amino acid metabolism;	Histidine metabolism;
fig|6666666.214148.peg.131	MM4TEC2__C2_L=1925355=	85993-587																			- none -
fig|6666666.214148.peg.1310	MM4TEC2__C2_L=1925355=	1340098+773					K02500	cyclase [EC:4.1.3.-]		COG0107	E	IGPS catalyzes the conversion of PRFAR and glutamine to IGP, AICAR and glutamate. The HisF subunit catalyzes the cyclization activity that produces IGP and AICAR from PRFAR using the ammonia provided by the HisH subunit (By similarity)				LPS	Endotoxin	imidazole glycerol phosphate synthase subunit HisF		Imidazole glycerol phosphate synthase cyclase subunit (EC 4.1.3.-)	Histidine Biosynthesis					M00026,	Histidine biosynthesis, PRPP => histidine;	Pathway module;	Nucleotide and amino acid metabolism;	Histidine metabolism;
fig|6666666.214148.peg.1311	MM4TEC2__C2_L=1925355=	1340861+599					K11755	phosphoribosyl-ATP pyrophosphohydrolase / phosphoribosyl-AMP cyclohydrolase [EC:3.6.1.31 3.5.4.19]		COG0140	E	phosphoribosyl-ATP pyrophosphatase							EC 3.5.4.19;EC 3.6.1.31	Phosphoribosyl-AMP cyclohydrolase / Phosphoribosyl-ATP pyrophosphatase	Histidine Biosynthesis;Histidine Biosynthesis					M00026,	Histidine biosynthesis, PRPP => histidine;	Pathway module;	Nucleotide and amino acid metabolism;	Histidine metabolism;
fig|6666666.214148.peg.1312	MM4TEC2__C2_L=1925355=	1341471+980					K01666	4-hydroxy 2-oxovalerate aldolase	EC:4.1.3.39	COG0119	E	Catalyzes the condensation of the acetyl group of acetyl-CoA with 3-methyl-2-oxobutanoate (2-oxoisovalerate) to form 3-carboxy-3-hydroxy-4-methylpentanoate (2-isopropylmalate) (By similarity)	4-hydroxy-2-oxovalerate_0	Virulence	4-hydroxy-2-oxovalerate aldolase (EC 4.1.3.39)				EC 4.1.3.39	4-hydroxy-2-oxovalerate aldolase	- none -
fig|6666666.214148.peg.1313	MM4TEC2__C2_L=1925355=	1342597+1013					K01599	uroporphyrinogen decarboxylase	EC:4.1.1.37	COG0407	H	Catalyzes the decarboxylation of four acetate groups of uroporphyrinogen-III to yield coproporphyrinogen-III (By similarity)								Methylcobamide:CoM methyltransferase MtbA	- none -					M00121,	Heme biosynthesis, glutamate => protoheme/siroheme;	Pathway module;	Nucleotide and amino acid metabolism;	Cofactor and vitamin biosynthesis;
fig|6666666.214148.peg.1314	MM4TEC2__C2_L=1925355=	1345529-1880					K06158	ATP-binding cassette, subfamily F, member 3		COG0488	S	(ABC) transporter	Zinc_0	Virulence	Zinc ABC transporter, ATP-binding protein ZnuC					ABC transporter, ATP-binding protein	- none -	3.A.1	ABC
fig|6666666.214148.peg.1315	MM4TEC2__C2_L=1925355=	1345561+125																			- none -
fig|6666666.214148.peg.1316	MM4TEC2__C2_L=1925355=	1346577-857					K04070	putative pyruvate formate lyase activating enzyme	EC:1.97.1.4	COG1313	S	radical SAM domain protein								radical activating enzyme	- none -
fig|6666666.214148.peg.1317	MM4TEC2__C2_L=1925355=	1346682+1163					K00789	S-adenosylmethionine synthetase	EC:2.5.1.6	COG0192	H	Catalyzes the formation of S-adenosylmethionine from methionine and ATP							EC 2.5.1.6	S-adenosylmethionine synthetase	Methionine Degradation					M00609,M00034,	Cysteine biosynthesis, methionine => cysteine;Methionine salvage pathway;	Pathway module;	Nucleotide and amino acid metabolism;	Cysteine and methionine metabolism;
fig|6666666.214148.peg.1318	MM4TEC2__C2_L=1925355=	1347866+746								COG1040	S	Competence protein								Competence protein F homolog, phosphoribosyltransferase domain; protein YhgH required for utilization of DNA as sole source of carbon and energy	Biotin biosynthesis Experimental;CBSS-216591.1.peg.168
fig|6666666.214148.peg.1319	MM4TEC2__C2_L=1925355=	1348609+164																			- none -
fig|6666666.214148.peg.132	MM4TEC2__C2_L=1925355=	86040+116																			- none -
fig|6666666.214148.peg.1320	MM4TEC2__C2_L=1925355=	1348815+2864					K03070	preprotein translocase subunit SecA		COG0653	U	Part of the Sec protein translocase complex. Interacts with the SecYEG preprotein conducting channel. Has a central role in coupling the hydrolysis of ATP to the transfer of proteins into and across the cell membrane, serving	Protein_0	Defense against host immune response|Secretion	Protein translocase subunit SecA					Protein translocase subunit SecA	- none -	3.A.5	3.A.5			M00335,	Sec (secretion) system;	Structural complex;	Environmental information processing;	Bacterial secretion system;
fig|6666666.214148.peg.1321	MM4TEC2__C2_L=1925355=	1351952+362								ENOG4112340	S	Hpt domain									- none -
fig|6666666.214148.peg.1322	MM4TEC2__C2_L=1925355=	1352340+4589				GT2				ENOG410XNMH	T	Histidine kinase	Hybrid_0	Virulence	Hybrid sensory histidine kinase in two-component regulatory system with EvgA					diguanylate cyclase/phosphodiesterase (GGDEF & EAL domains) with PAS/PAC sensor(s)	- none -
fig|6666666.214148.peg.1323	MM4TEC2__C2_L=1925355=	1356931+1964				GT2				ENOG410XNMH	T	Histidine kinase	Signal_0	Intracellular survival and replication|Invasion	Signal transduction histidine-protein kinase BarA (EC 2.7.13.3)						- none -	2.A.21	APC
fig|6666666.214148.peg.1324	MM4TEC2__C2_L=1925355=	1359124+1100					K00850	6-phosphofructokinase 1	EC:2.7.1.11	COG0205	G	phosphohexokinase	6-phosphofructokinase_0	Cellular metabolism	6-phosphofructokinase (EC 2.7.1.11)				EC 2.7.1.11	6-phosphofructokinase	Glycolysis and Gluconeogenesis			MF0080,	Glycolysis (preparatory phase);	M00001,	Glycolysis (Embden-Meyerhof pathway), glucose => pyruvate;	Pathway module;	Carbohydrate and lipid metabolism;	Central carbohydrate metabolism;
fig|6666666.214148.peg.1325	MM4TEC2__C2_L=1925355=	1360239+1016					K01524	exopolyphosphatase / guanosine-5'-triphosphate,3'-diphosphate pyrophosphatase [EC:3.6.1.11 3.6.1.40]		COG0248	FP	ppx gppa phosphatase									- none -
fig|6666666.214148.peg.1326	MM4TEC2__C2_L=1925355=	1361259+2060					K00937	polyphosphate kinase	EC:2.7.4.1	COG0855	P	Catalyzes the reversible transfer of the terminal phosphate of ATP to form a long-chain polyphosphate (polyP) (By similarity)	Polyphosphate_0	Intracellular survival and replication	Polyphosphate kinase (EC 2.7.4.1)				EC 2.7.4.1	Polyphosphate kinase	High affinity phosphate transporter and control of PHO regulon;Phosphate metabolism; <br>Polyphosphate; <br>Purine conversions
fig|6666666.214148.peg.1327	MM4TEC2__C2_L=1925355=	1363426+1097				GT8	K02836	peptide chain release factor 2		COG1186	J	Peptide chain release factor 2 directs the termination of translation in response to the peptide chain termination codons UGA and UAA (By similarity)								Peptide chain release factor 2; programmed frameshift-containing	Programmed frameshift;Programmed frameshift; <br>Translation termination factors bacterial
fig|6666666.214148.peg.1328	MM4TEC2__C2_L=1925355=	1364525+635																			- none -
fig|6666666.214148.peg.1329	MM4TEC2__C2_L=1925355=	1365208+1058					K01409	N6-L-threonylcarbamoyladenine synthase	EC:2.3.1.234	COG0533	O	Required for the formation of a threonylcarbamoyl group on adenosine at position 37 (t(6)A37) in tRNAs that read codons beginning with adenine (By similarity)	N(6)-L-threonylcarbamoyladenine_0	Virulence	N(6)-L-threonylcarbamoyladenine synthase (EC 2.3.1.234)				EC 2.3.1.234	N(6)-L-threonylcarbamoyladenine synthase	- none -
fig|6666666.214148.peg.133	MM4TEC2__C2_L=1925355=	86209+677																			- none -
fig|6666666.214148.peg.1330	MM4TEC2__C2_L=1925355=	1366381+434																			- none -
fig|6666666.214148.peg.1331	MM4TEC2__C2_L=1925355=	1366894+626			BacterialCW	GH23				ENOG4111NAR	S	peptidase M23									- none -
fig|6666666.214148.peg.1332	MM4TEC2__C2_L=1925355=	1367695-119																			- none -
fig|6666666.214148.peg.1333	MM4TEC2__C2_L=1925355=	1367717+1454								COG0308	E	aminopeptidase								Aminopeptidase N	- none -
fig|6666666.214148.peg.1334	MM4TEC2__C2_L=1925355=	1369209+230																			- none -
fig|6666666.214148.peg.1335	MM4TEC2__C2_L=1925355=	1369568+263																			- none -
fig|6666666.214148.peg.1336	MM4TEC2__C2_L=1925355=	1369828+920					K06438	similar to stage IV sporulation protein		ENOG410XR5M	S	sporulation protein yqfd									- none -
fig|6666666.214148.peg.1337	MM4TEC2__C2_L=1925355=	1370810+932					K06217	phosphate starvation-inducible protein PhoH and related proteins		COG1702	T	Phoh family								Phosphate starvation-inducible protein PhoH, predicted ATPase	CBSS-56780.10.peg.1536;CBSS-56780.10.peg.1536; <br>Glycyl-tRNA synthetase containing cluster; <br>Phosphate metabolism; <br>Phosphate metabolism
fig|6666666.214148.peg.1338	MM4TEC2__C2_L=1925355=	1371739+1487					K07037	uncharacterized protein		COG1480	S	Metal Dependent Phosphohydrolase								Membrane protein containing HD superfamily hydrolase domain, YQFF ortholog	CBSS-56780.10.peg.1536
fig|6666666.214148.peg.1339	MM4TEC2__C2_L=1925355=	1373227+473					K07042	probable rRNA maturation factor		COG0319	S	metalloendopeptidase activity								Metal-dependent hydrolase YbeY, involved in rRNA and/or ribosome maturation and assembly	CBSS-56780.10.peg.1536;Glycyl-tRNA synthetase containing cluster
fig|6666666.214148.peg.134	MM4TEC2__C2_L=1925355=	88037-1118					K02495	oxygen-independent coproporphyrinogen III oxidase	EC:1.3.99.22	COG0635	H	Coproporphyrinogen III oxidase	Hypothetical_0	Virulence	Hypothetical radical SAM family enzyme in heat shock gene cluster, similarity with CPO of BS HemN-type					Hypothetical radical SAM family enzyme in heat shock gene cluster, similarity with CPO of BS HemN-type	Heat shock dnaK gene cluster extended					M00121,	Heme biosynthesis, glutamate => protoheme/siroheme;	Pathway module;	Nucleotide and amino acid metabolism;	Cofactor and vitamin biosynthesis;
fig|6666666.214148.peg.1340	MM4TEC2__C2_L=1925355=	1373697+899					K03595	GTPase		COG1159	S	An essential GTPase that binds both GDP and GTP, with rapid nucleotide exchange. Plays a role in 16S rRNA processing and 30S ribosomal subunit biogenesis and possibly also in cell cycle regulation and energy metabolism (By similarity)								GTP-binding protein Era	Glycyl-tRNA synthetase containing cluster
fig|6666666.214148.peg.1341	MM4TEC2__C2_L=1925355=	1374650+107																			- none -
fig|6666666.214148.peg.1342	MM4TEC2__C2_L=1925355=	1374791+224																			- none -
fig|6666666.214148.peg.1343	MM4TEC2__C2_L=1925355=	1375194+725					K03584	DNA repair protein RecO (recombination protein O)		COG1381	L	Involved in DNA repair and RecF pathway recombination (By similarity)									- none -
fig|6666666.214148.peg.1344	MM4TEC2__C2_L=1925355=	1376036+2636					K01006	pyruvate, orthophosphate dikinase	EC:2.7.9.1	COG0574	G	phosphotransferase activity, paired acceptors	Phosphoenolpyruvate-protein_0	Intracellular survival and replication	Phosphoenolpyruvate-protein phosphotransferase of PTS system (EC 2.7.3.9)				EC 2.7.9.1	Pyruvate,phosphate dikinase	Glycolysis and Gluconeogenesis;Pyruvate metabolism I: anaplerotic reactions, PEP	4.A.1	PTS-GFL
fig|6666666.214148.peg.1345	MM4TEC2__C2_L=1925355=	1378833+1007					K01599	uroporphyrinogen decarboxylase	EC:4.1.1.37	ENOG4111QGA	S	Uroporphyrinogen decarboxylase (URO-D)									- none -					M00121,	Heme biosynthesis, glutamate => protoheme/siroheme;	Pathway module;	Nucleotide and amino acid metabolism;	Cofactor and vitamin biosynthesis;
fig|6666666.214148.peg.1346	MM4TEC2__C2_L=1925355=	1379865+2063			PlantCW	GH78				ENOG410XRPP	S	Bacterial alpha-L-rhamnosidase									- none -
fig|6666666.214148.peg.1347	MM4TEC2__C2_L=1925355=	1381930+2054			AnimalCarb	GH105	K05970	sialate O-acetylesterase	EC:3.1.1.53												- none -
fig|6666666.214148.peg.1348	MM4TEC2__C2_L=1925355=	1384075+2978																			- none -
fig|6666666.214148.peg.1349	MM4TEC2__C2_L=1925355=	1387073+1010					K00091	dihydroflavonol-4-reductase	EC:1.1.1.219	ENOG410XQSG	S	Nad-dependent epimerase dehydratase							EC 1.1.1.219	Dihydroflavonol-4-reductase	- none -
fig|6666666.214148.peg.135	MM4TEC2__C2_L=1925355=	88367-317					K07443	methylated-DNA-protein-cysteine methyltransferase related protein		COG3695	L	Methyltransferase									- none -
fig|6666666.214148.peg.1350	MM4TEC2__C2_L=1925355=	1388080+890								ENOG4111KVH	S	NA									- none -
fig|6666666.214148.peg.1351	MM4TEC2__C2_L=1925355=	1389556-554								COG2135	S	conserved protein									- none -
fig|6666666.214148.peg.1352	MM4TEC2__C2_L=1925355=	1389624+251								ENOG411225J	S	NA									- none -
fig|6666666.214148.peg.1353	MM4TEC2__C2_L=1925355=	1389884+1232					K02346	DNA polymerase IV	EC:2.7.7.7	COG0389	L	Poorly processive error-prone DNA polymerase involved in untargeted mutagenesis. Copies undamaged DNA at stalled replication forks which arise in vivo from mismatched or misaligned primer ends. These misaligned primers can be extended by polIV. Exhibits no 3-5 exonuclease (proofreading) activity. May be involved in translesional synthesis in conjunction with the beta clamp from polIII (By similar…	DNA_0	Virulence	DNA polymerase IV (EC 2.7.7.7)				EC 2.7.7.7	DNA polymerase IV	DNA repair, bacterial
fig|6666666.214148.peg.1354	MM4TEC2__C2_L=1925355=	1392295-1139								COG1940	G	ROK family									- none -
fig|6666666.214148.peg.1355	MM4TEC2__C2_L=1925355=	1392489+1769				GH127	K09955	uncharacterized protein		COG3533	S	Secreted protein									- none -
fig|6666666.214148.peg.1356	MM4TEC2__C2_L=1925355=	1394255+1877				GH127	K09955	uncharacterized protein		COG3533	S	Secreted protein									- none -
fig|6666666.214148.peg.1357	MM4TEC2__C2_L=1925355=	1396144+1433								COG2407	G	Converts the aldose L-fucose into the corresponding ketose L-fuculose (By similarity)									- none -
fig|6666666.214148.peg.1358	MM4TEC2__C2_L=1925355=	1397574+1259								ENOG4111T85	S	Tagatose 6 phosphate kinase									- none -
fig|6666666.214148.peg.1359	MM4TEC2__C2_L=1925355=	1398830+914					K00845	glucokinase	EC:2.7.1.2	COG1940	G	ROK family	ROK_0	Cellular metabolism	ROK family sugar kinase or transcriptional regulator						- none -			MF0080,	Glycolysis (preparatory phase);	M00549,M00001,	Nucleotide sugar biosynthesis, glucose => UDP-glucose;Glycolysis (Embden-Meyerhof pathway), glucose => pyruvate;	Pathway module;	Carbohydrate and lipid metabolism;	Sugar metabolism;
fig|6666666.214148.peg.136	MM4TEC2__C2_L=1925355=	90188-1805					K03596	GTP-binding protein LepA		COG0481	M	Required for accurate and efficient protein synthesis under certain stress conditions. May act as a fidelity factor of the translation reaction, by catalyzing a one-codon backward translocation of tRNAs on improperly translocated ribosomes. Back- translocation proceeds from a post-translocation (POST) complex to a pre-translocation (PRE) complex, thus giving elongation factor G a second chance to…								Translation elongation factor LepA	Heat shock dnaK gene cluster extended;Translation elongation factors bacterial
fig|6666666.214148.peg.1360	MM4TEC2__C2_L=1925355=	1399749+944					K17319	putative aldouronate transport system permease protein		COG4209	G	Binding-protein-dependent transport systems inner membrane component	N-acetyl-D-glucosamine_0	Virulence	N-acetyl-D-glucosamine ABC transporter, permease protein 1						- none -	3.A.1	ABC			M00603,	Putative aldouronate transport system;	Structural complex;	Environmental information processing;	Saccharide, polyol, and lipid transport system;
fig|6666666.214148.peg.1361	MM4TEC2__C2_L=1925355=	1400704+914				GH130	K17320	putative aldouronate transport system permease protein		COG0395	G	Binding-protein-dependent transport systems inner membrane component	Maltodextrin_0	Virulence	Maltodextrin ABC transporter, permease protein MdxG						- none -	3.A.1	ABC			M00603,	Putative aldouronate transport system;	Structural complex;	Environmental information processing;	Saccharide, polyol, and lipid transport system;
fig|6666666.214148.peg.1362	MM4TEC2__C2_L=1925355=	1401638+1622					K17318	putative aldouronate transport system substrate-binding protein		COG1653	G	transporter activity									- none -					M00603,	Putative aldouronate transport system;	Structural complex;	Environmental information processing;	Saccharide, polyol, and lipid transport system;
fig|6666666.214148.peg.1363	MM4TEC2__C2_L=1925355=	1403284+2966																			- none -
fig|6666666.214148.peg.1364	MM4TEC2__C2_L=1925355=	1406305+2567			PlantCW	GH78	K05989	alpha-L-rhamnosidase	EC:3.2.1.40	ENOG410XNWE	S	K05989 alpha-L-rhamnosidase EC 3.2.1.40							EC 3.2.1.40	Alfa-L-rhamnosidase	- none -
fig|6666666.214148.peg.1365	MM4TEC2__C2_L=1925355=	1408869+476				GT9				COG0241	E	histidinol-phosphatase activity				LOS	Adherence|Endotoxin	hydrolase, putative	EC 3.1.3.15;EC 4.2.1.19	Histidinol-phosphatase / Imidazoleglycerol-phosphate dehydratase	Histidine Biosynthesis;Histidine Biosynthesis
fig|6666666.214148.peg.1366	MM4TEC2__C2_L=1925355=	1409912-533								ENOG41124BP	S	Catalyzes the epimerization of the S- and R-forms of NAD(P)HX, a damaged form of NAD(P)H that is a result of enzymatic or heat-dependent hydration. This is a prerequisite for the S- specific NAD(P)H-hydrate dehydratase to allow the repair of both epimers of NAD(P)HX (By similarity)									- none -
fig|6666666.214148.peg.1367	MM4TEC2__C2_L=1925355=	1410803-881								COG0583	K	Transcriptional regulator								Transcriptional regulator, LysR family	- none -
fig|6666666.214148.peg.1368	MM4TEC2__C2_L=1925355=	1410913+587					K07240	chromate transporter		COG2059	P	Chromate								Chromate transport protein	- none -	2.A.51	2.A.51
fig|6666666.214148.peg.1369	MM4TEC2__C2_L=1925355=	1411497+560					K07240	chromate transporter		COG2059	P	Chromate								Chromate transport protein	- none -	2.A.51	2.A.51
fig|6666666.214148.peg.137	MM4TEC2__C2_L=1925355=	90314+737								COG0584	C	glycerophosphoryl diester phosphodiesterase							EC 3.1.4.46	Glycerophosphoryl diester phosphodiesterase	Glycerol and Glycerol-3-phosphate Uptake and Utilization
fig|6666666.214148.peg.1370	MM4TEC2__C2_L=1925355=	1412935-845			PlantCW	GH39				ENOG4111G16	K	Transcriptional regulator (AraC family)									- none -
fig|6666666.214148.peg.1371	MM4TEC2__C2_L=1925355=	1413063+1112					K01599	uroporphyrinogen decarboxylase	EC:4.1.1.37	ENOG4111F46	S	Uroporphyrinogen decarboxylase (URO-D)									- none -					M00121,	Heme biosynthesis, glutamate => protoheme/siroheme;	Pathway module;	Nucleotide and amino acid metabolism;	Cofactor and vitamin biosynthesis;
fig|6666666.214148.peg.1372	MM4TEC2__C2_L=1925355=	1414305+1997																			- none -
fig|6666666.214148.peg.1373	MM4TEC2__C2_L=1925355=	1417453-1109																			- none -
fig|6666666.214148.peg.1374	MM4TEC2__C2_L=1925355=	1417624+1388					K10200	N-acetylglucosamine transport system substrate-binding protein		ENOG410XR78	G	solute-binding protein									- none -					M00205,	N-Acetylglucosamine transport system;	Structural complex;	Environmental information processing;	Saccharide, polyol, and lipid transport system;
fig|6666666.214148.peg.1375	MM4TEC2__C2_L=1925355=	1419032+1364								ENOG4111I78	S	NA									- none -
fig|6666666.214148.peg.1376	MM4TEC2__C2_L=1925355=	1420413+986					K02025	multiple sugar transport system permease protein		COG1175	P	binding-protein-dependent transport systems inner membrane Component	N-acetyl-D-glucosamine_0	Virulence	N-acetyl-D-glucosamine ABC transporter, permease protein 1						- none -	3.A.1	ABC			M00207,	Putative multiple sugar transport system;	Structural complex;	Environmental information processing;	Saccharide, polyol, and lipid transport system;
fig|6666666.214148.peg.1377	MM4TEC2__C2_L=1925355=	1421420+2588																			- none -
fig|6666666.214148.peg.1378	MM4TEC2__C2_L=1925355=	1424071+845				GH42	K10119	raffinose/stachyose/melibiose transport system permease protein		COG0395	G	Binding-protein-dependent transport systems inner membrane component	N-acetyl-D-glucosamine_0	Virulence	N-acetyl-D-glucosamine ABC transporter, permease protein 2						- none -	3.A.1	ABC			M00196,	Raffinose/stachyose/melibiose transport system;	Structural complex;	Environmental information processing;	Saccharide, polyol, and lipid transport system;
fig|6666666.214148.peg.1379	MM4TEC2__C2_L=1925355=	1424929+1382								ENOG4111I78	S	NA									- none -
fig|6666666.214148.peg.138	MM4TEC2__C2_L=1925355=	91367-224					K02078	acyl carrier protein		COG0236	I	Carrier of the growing fatty acid chain in fatty acid biosynthesis (By similarity)								Acyl carrier protein	Fatty Acid Biosynthesis FASII;Glycerolipid and Glycerophospholipid Metabolism in Bacteria
fig|6666666.214148.peg.1380	MM4TEC2__C2_L=1925355=	1426323+1232																			- none -
fig|6666666.214148.peg.1381	MM4TEC2__C2_L=1925355=	1427630+1877								ENOG410XRMZ	S	NA									- none -
fig|6666666.214148.peg.1382	MM4TEC2__C2_L=1925355=	1429591+1202								COG1940	G	ROK family									- none -
fig|6666666.214148.peg.1383	MM4TEC2__C2_L=1925355=	1430819+1313								ENOG410ZJI3	S	NA									- none -
fig|6666666.214148.peg.1384	MM4TEC2__C2_L=1925355=	1432238+926			PlantCW,AnimalCarb	GH1	K01809	mannose-6-phosphate isomerase	EC:5.3.1.8	COG1482	G	mannose-6-phosphate isomerase							EC 5.3.1.8	Mannose-6-phosphate isomerase	Mannose Metabolism			MF0061,	mannose degradation;
fig|6666666.214148.peg.1385	MM4TEC2__C2_L=1925355=	1433161+968					K00845	glucokinase	EC:2.7.1.2	COG1940	G	ROK family	ROK_0	Cellular metabolism	ROK family sugar kinase or transcriptional regulator					ROK family protein (putative glucokinase)	- none -			MF0080,	Glycolysis (preparatory phase);	M00549,M00001,	Nucleotide sugar biosynthesis, glucose => UDP-glucose;Glycolysis (Embden-Meyerhof pathway), glucose => pyruvate;	Pathway module;	Carbohydrate and lipid metabolism;	Sugar metabolism;
fig|6666666.214148.peg.1386	MM4TEC2__C2_L=1925355=	1434180+782																			- none -
fig|6666666.214148.peg.1387	MM4TEC2__C2_L=1925355=	1436659-1394								COG0534	V	Mate efflux family protein								Multi antimicrobial extrusion protein (Na(+)/drug antiporter), MATE family of MDR efflux pumps	Multidrug Resistance Efflux Pumps	2.A.66	MOP
fig|6666666.214148.peg.1388	MM4TEC2__C2_L=1925355=	1436860+650								ENOG410YTCU	K	Transcriptional regulator, TetR family								Transcriptional regulator, AcrR family	- none -
fig|6666666.214148.peg.1389	MM4TEC2__C2_L=1925355=	1437604+1778				GT4	K06147	ATP-binding cassette, subfamily B, bacterial		COG1132	V	(ABC) transporter	Iron_0	Iron uptake	Iron siderophore ABC transporter, permeaseATP-binding protein IrtA					ABC transporter, ATP-binding protein	- none -	3.A.1	ABC
fig|6666666.214148.peg.139	MM4TEC2__C2_L=1925355=	93601-2168					K06959	protein Tex		COG2183	K	domain protein								Transcription accessory protein (S1 RNA-binding domain)	Cell division-ribosomal stress proteins cluster;Transcription factors bacterial
fig|6666666.214148.peg.1390	MM4TEC2__C2_L=1925355=	1439379+1718				GT2	K06147	ATP-binding cassette, subfamily B, bacterial		COG1132	V	(ABC) transporter	Putative_0	Iron uptake	Putative ABC iron siderophore transporter, fused permease and ATPase domains					ABC transporter ATP-binding/transmembrane protein	- none -	3.A.1	ABC
fig|6666666.214148.peg.1391	MM4TEC2__C2_L=1925355=	1442696-1412								COG0534	V	Mate efflux family protein								Multi antimicrobial extrusion protein (Na(+)/drug antiporter), MATE family of MDR efflux pumps	Multidrug Resistance Efflux Pumps	2.A.66	MOP
fig|6666666.214148.peg.1392	MM4TEC2__C2_L=1925355=	1443176+545					K01507	inorganic pyrophosphatase	EC:3.6.1.1	COG0221	C	Pyrophosphate phospho-hydrolase							EC 3.6.1.1	Inorganic pyrophosphatase	Phosphate metabolism
fig|6666666.214148.peg.1393	MM4TEC2__C2_L=1925355=	1443718+512								COG1335	Q	isochorismatase							EC 3.5.1.19	Nicotinamidase	NAD and NADP cofactor biosynthesis global
fig|6666666.214148.peg.1394	MM4TEC2__C2_L=1925355=	1444328+1280								COG0475	P	Sodium hydrogen exchanger								Na+/H+ antiporter	- none -	2.A.37	CPA
fig|6666666.214148.peg.1395	MM4TEC2__C2_L=1925355=	1446408-782					K07024	uncharacterized protein		COG0561	S	,hydrolase									- none -
fig|6666666.214148.peg.1396	MM4TEC2__C2_L=1925355=	1447954-1529					K06131	cardiolipin synthase [EC:2.7.8.-]		COG1502	I	Catalyzes the reversible phosphatidyl group transfer from one phosphatidylglycerol molecule to another to form cardiolipin (CL) (diphosphatidylglycerol) and glycerol (By similarity)								Cardiolipin synthetase (EC 2.7.8.-)	Cardiolipin synthesis;Glycerolipid and Glycerophospholipid Metabolism in Bacteria
fig|6666666.214148.peg.1397	MM4TEC2__C2_L=1925355=	1448999-992					K00008	L-iditol 2-dehydrogenase	EC:1.1.1.14	COG1063	E	Dehydrogenase									- none -			MF0073,	sorbitol degradation (dehydrogenase);
fig|6666666.214148.peg.1398	MM4TEC2__C2_L=1925355=	1449182-131																			- none -
fig|6666666.214148.peg.1399	MM4TEC2__C2_L=1925355=	1449291+203					K02909	large subunit ribosomal protein L31		COG0254	J	50S ribosomal protein L3-1								LSU ribosomal protein L31p @ LSU ribosomal protein L31p, zinc-dependent	Ribosome LSU bacterial;Ribosome LSU bacterial					M00178,	Ribosome, bacteria;	Structural complex;	Genetic information processing;	Ribosome;
fig|6666666.214148.peg.14	MM4TEC2__C1_L=46754=	11587-308																			- none -
fig|6666666.214148.peg.140	MM4TEC2__C2_L=1925355=	94412-695								COG4912	L	DNA alkylation repair enzyme									- none -
fig|6666666.214148.peg.1400	MM4TEC2__C2_L=1925355=	1449581+1820								COG2890	J	Methylates the class 1 translation termination release factors RF1 PrfA and RF2 PrfB on the glutamine residue of the universally conserved GGQ motif (By similarity)							EC 2.1.1.297	Peptide chain release factor N(5)-glutamine methyltransferase	- none -
fig|6666666.214148.peg.1401	MM4TEC2__C2_L=1925355=	1451409+1073				GT8	K02835	peptide chain release factor 1		COG0216	J	Peptide chain release factor 1 directs the termination of translation in response to the peptide chain termination codons UAG and UAA (By similarity)								Peptide chain release factor 1	Translation termination factors bacterial
fig|6666666.214148.peg.1402	MM4TEC2__C2_L=1925355=	1452538+1190					K00812	aspartate aminotransferase	EC:2.6.1.1	COG0436	E	aminotransferase							EC 2.6.1.1	Aspartate aminotransferase	CBSS-216591.1.peg.168;Glutamine, Glutamate, Aspartate and Asparagine Biosynthesis; <br>Threonine and Homoserine Biosynthesis			MF0007,MF0008,MF0011,MF0033,	phenylalanine degradation;tyrosine degradation (hydroxyphenylacetaldehyde pathway);aspartate degradation (oxaloacetate pathway);cysteine degradation (mercaptopyruvate pathway);
fig|6666666.214148.peg.1403	MM4TEC2__C2_L=1925355=	1453728+1406								COG0119	E	Catalyzes the condensation of the acetyl group of acetyl-CoA with 3-methyl-2-oxobutanoate (2-oxoisovalerate) to form 3-carboxy-3-hydroxy-4-methylpentanoate (2-isopropylmalate) (By similarity)							EC 2.3.3.3	Re face-specific citrate synthase	- none -
fig|6666666.214148.peg.1404	MM4TEC2__C2_L=1925355=	1455250+407								ENOG41121S9	S	NA									- none -
fig|6666666.214148.peg.1405	MM4TEC2__C2_L=1925355=	1455826+1484					K01733	threonine synthase	EC:4.2.3.1	COG0498	E	threonine synthase							EC 4.2.3.1	Threonine synthase	Threonine and Homoserine Biosynthesis
fig|6666666.214148.peg.1406	MM4TEC2__C2_L=1925355=	1457368+914				GT2	K11050	multidrug/hemolysin transport system ATP-binding protein		COG1131	V	(ABC) transporter	drrA	Virulence	ATP-dependent efflux pump essential for phthiocerol dimycocerosates translocation, ATP-binding protein DrrA-like	PDIM	Cell wall	daunorubicin resistance ABC transporter ATPase subunit		Methionine ABC transporter ATP-binding protein	Methionine Degradation	3.A.1	ABC			M00298,	Multidrug/hemolysin transport system;	Structural complex;	Environmental information processing;	ABC-2 type and other transport systems;
fig|6666666.214148.peg.1407	MM4TEC2__C2_L=1925355=	1458279+896					K11051	multidrug/hemolysin transport system permease protein		COG0842	V	(ABC) transporter								ABC transporter, permease protein	- none -	3.A.1	ABC			M00298,	Multidrug/hemolysin transport system;	Structural complex;	Environmental information processing;	ABC-2 type and other transport systems;
fig|6666666.214148.peg.1408	MM4TEC2__C2_L=1925355=	1459335+2126																			- none -
fig|6666666.214148.peg.1409	MM4TEC2__C2_L=1925355=	1461520+1550																			- none -
fig|6666666.214148.peg.141	MM4TEC2__C2_L=1925355=	94767-368								COG3663	L	U mismatch-specific DNA glycosylase								G:T/U mismatch-specific uracil/thymine DNA-glycosylase	DNA repair, bacterial;Uracil-DNA glycosylase
fig|6666666.214148.peg.1410	MM4TEC2__C2_L=1925355=	1464004-893			PlantCW	GH39				COG2207	K	Transcriptional Regulator AraC Family									- none -
fig|6666666.214148.peg.1411	MM4TEC2__C2_L=1925355=	1464253+1814					K17319	putative aldouronate transport system permease protein		COG4209	G	Binding-protein-dependent transport systems inner membrane component	N-acetyl-D-glucosamine_0	Virulence	N-acetyl-D-glucosamine ABC transporter, permease protein 1						- none -	3.A.1	ABC			M00603,	Putative aldouronate transport system;	Structural complex;	Environmental information processing;	Saccharide, polyol, and lipid transport system;
fig|6666666.214148.peg.1412	MM4TEC2__C2_L=1925355=	1466084+881				GH130	K17320	putative aldouronate transport system permease protein		COG0395	G	Binding-protein-dependent transport systems inner membrane component									- none -	3.A.1	ABC			M00603,	Putative aldouronate transport system;	Structural complex;	Environmental information processing;	Saccharide, polyol, and lipid transport system;
fig|6666666.214148.peg.1413	MM4TEC2__C2_L=1925355=	1466985+1640					K17318	putative aldouronate transport system substrate-binding protein		COG1653	G	transporter activity									- none -					M00603,	Putative aldouronate transport system;	Structural complex;	Environmental information processing;	Saccharide, polyol, and lipid transport system;
fig|6666666.214148.peg.1414	MM4TEC2__C2_L=1925355=	1468689+1292																			- none -
fig|6666666.214148.peg.1415	MM4TEC2__C2_L=1925355=	1469986+1508			PlantCW	GH36	K07407	alpha-galactosidase	EC:3.2.1.22	COG3345	G	alpha-galactosidase									- none -			MF0050,	melibiose degradation;
fig|6666666.214148.peg.1416	MM4TEC2__C2_L=1925355=	1471514+1526																			- none -
fig|6666666.214148.peg.1417	MM4TEC2__C2_L=1925355=	1473055+1238				GH0	K03931	putative isomerase		COG1626	G	trehalase									- none -
fig|6666666.214148.peg.1418	MM4TEC2__C2_L=1925355=	1474306+854								ENOG410Y8V2	G	Xylose isomerase domain protein TIM barrel									- none -
fig|6666666.214148.peg.1419	MM4TEC2__C2_L=1925355=	1475157+1424			Fructans	GH32	K03332	fructan beta-fructosidase	EC:3.2.1.80	COG1621	G	Hydrolase									- none -			MF0063,	fructan degradation;
fig|6666666.214148.peg.142	MM4TEC2__C2_L=1925355=	94783+119																			- none -
fig|6666666.214148.peg.1420	MM4TEC2__C2_L=1925355=	1476626+1079			AnimalCarb	GH109				COG0673	S	oxidoreductase							EC 1.1.1.18	Myo-inositol 2-dehydrogenase	- none -
fig|6666666.214148.peg.1421	MM4TEC2__C2_L=1925355=	1477709+1040			AnimalCarb	GH109				COG0673	S	oxidoreductase				LPS	Endotoxin	probable oxidoreductase		Homolog of myo-inositol 2-dehydrogenase	- none -
fig|6666666.214148.peg.1422	MM4TEC2__C2_L=1925355=	1478746+866								ENOG411001G	S	NA								hypothetical oxidoreductase	- none -
fig|6666666.214148.peg.1423	MM4TEC2__C2_L=1925355=	1479612+2087			PlantCW	GH78	K05989	alpha-L-rhamnosidase	EC:3.2.1.40	ENOG410XNWE	S	K05989 alpha-L-rhamnosidase EC 3.2.1.40									- none -
fig|6666666.214148.peg.1424	MM4TEC2__C2_L=1925355=	1481926+1010					K01867	tryptophanyl-tRNA synthetase	EC:6.1.1.2	COG0180	J	tryptophanyltRNA synthetase	Tryptophanyl-tRNA_0	Virulence	Tryptophanyl-tRNA synthetase (EC 6.1.1.2)				EC 6.1.1.2	Tryptophanyl-tRNA synthetase	A cluster relating to Tryptophanyl-tRNA synthetase;tRNA aminoacylation, Trp					M00359,M00360,	Aminoacyl-tRNA biosynthesis, eukaryotes;Aminoacyl-tRNA biosynthesis, prokaryotes;	Functional set;	Metabolism;	Aminoacyl tRNA;
fig|6666666.214148.peg.1425	MM4TEC2__C2_L=1925355=	1482940+881								ENOG410XPA9	S	NA									- none -	1.E.12	HolinVI
fig|6666666.214148.peg.1426	MM4TEC2__C2_L=1925355=	1483877+632								COG2214	O	DNAj domain protein									- none -
fig|6666666.214148.peg.1427	MM4TEC2__C2_L=1925355=	1484587+524																			- none -
fig|6666666.214148.peg.1428	MM4TEC2__C2_L=1925355=	1485143+1409					K03215	23S rRNA (uracil1939-C5)-methyltransferase	EC:2.1.1.190	COG2265	J	catalyzes the formation of 5-methyl-uridine at position								RNA methyltransferase, TrmA family	- none -
fig|6666666.214148.peg.1429	MM4TEC2__C2_L=1925355=	1486553+437								ENOG411224T	S	NA									- none -
fig|6666666.214148.peg.143	MM4TEC2__C2_L=1925355=	96216-1244								COG0612	O	peptidase'								FIG007959: peptidase, M16 family	CBSS-1806.1.peg.3045
fig|6666666.214148.peg.1430	MM4TEC2__C2_L=1925355=	1487810-788																			- none -
fig|6666666.214148.peg.1431	MM4TEC2__C2_L=1925355=	1487913+2126					K00656	formate C-acetyltransferase	EC:2.3.1.54	COG1882	C	formate acetyltransferase	2-ketobutyrate_0	Virulence	2-ketobutyrate formate-lyase (EC 2.3.1.-) Pyruvate formate-lyase (EC 2.3.1.54)				EC 2.3.1.54	Pyruvate formate-lyase	Fermentations: Mixed acid			MF0001,MF0030,MF0085,	ethanol production (formate pathway);threonine degradation (formate pathway);pyruvate:formate lyase;
fig|6666666.214148.peg.1432	MM4TEC2__C2_L=1925355=	1490043+761					K04069	pyruvate formate lyase activating enzyme	EC:1.97.1.4	COG1180	O	activating enzyme	Pyruvate_0	Virulence	Pyruvate formate-lyase activating enzyme (EC 1.97.1.4)				EC 1.97.1.4	Pyruvate formate-lyase activating enzyme	Fermentations: Mixed acid
fig|6666666.214148.peg.1433	MM4TEC2__C2_L=1925355=	1490817+1091				CE0				COG1063	E	Dehydrogenase	Alcohol_0	Virulence	Alcohol dehydrogenase (EC 1.1.1.1)						- none -
fig|6666666.214148.peg.1434	MM4TEC2__C2_L=1925355=	1492153+1625								ENOG410ZB7H	S	NA									- none -
fig|6666666.214148.peg.1435	MM4TEC2__C2_L=1925355=	1494621-797								COG1609	K	Transcriptional regulator									- none -
fig|6666666.214148.peg.1436	MM4TEC2__C2_L=1925355=	1494676+1670			AlpGlucans	GH13	K05992			COG0366	G	alpha amylase, catalytic	Trehalose_0	Virulence	Trehalose synthase (EC 5.4.99.16) Alpha-amylase (EC 3.2.1.1)				EC 3.2.1.135	Neopullulanase	Maltose and Maltodextrin Utilization	8.A.9	8.A.9
fig|6666666.214148.peg.1437	MM4TEC2__C2_L=1925355=	1496553-197																			- none -
fig|6666666.214148.peg.1438	MM4TEC2__C2_L=1925355=	1496585+1454					K15770	arabinogalactan oligomer / maltooligosaccharide transport system substrate-binding protein		COG2182	G	extracellular solute-binding protein, family 1								Maltose/maltodextrin ABC transporter, substrate binding periplasmic protein MalE	Alpha-Amylase locus in Streptocococcus;Bacterial Chemotaxis; <br>Maltose and Maltodextrin Utilization	3.A.1	ABC			M00491,	arabinogalactan oligomer/maltooligosaccharide transport system;	Structural complex;	Environmental information processing;	Saccharide, polyol, and lipid transport system;
fig|6666666.214148.peg.1439	MM4TEC2__C2_L=1925355=	1498053+1346					K15771	arabinogalactan oligomer / maltooligosaccharide transport system permease protein		COG1175	P	binding-protein-dependent transport systems inner membrane Component	N-acetyl-D-glucosamine_0	Virulence	N-acetyl-D-glucosamine ABC transporter, permease protein 1					Maltose/maltodextrin ABC transporter, permease protein MalF	Maltose and Maltodextrin Utilization	3.A.1	ABC			M00491,	arabinogalactan oligomer/maltooligosaccharide transport system;	Structural complex;	Environmental information processing;	Saccharide, polyol, and lipid transport system;
fig|6666666.214148.peg.144	MM4TEC2__C2_L=1925355=	96968-719				CE4				ENOG41112BD	S	Polysaccharide deacetylase	pgdA	Escape from the phagosome|Defense against host immune response	Peptidoglycan-N-acetylmuramic acid deacetylase PdaC					FIG007013: polysaccharide deacetylase, putative	- none -
fig|6666666.214148.peg.1440	MM4TEC2__C2_L=1925355=	1499396+842				GH130	K15772	arabinogalactan oligomer / maltooligosaccharide transport system permease protein		COG3833	P	carbohydrate transport	Maltodextrin_0	Virulence	Maltodextrin ABC transporter, permease protein MdxG					Maltose/maltodextrin ABC transporter, permease protein MalG	Maltose and Maltodextrin Utilization	3.A.1	ABC			M00491,	arabinogalactan oligomer/maltooligosaccharide transport system;	Structural complex;	Environmental information processing;	Saccharide, polyol, and lipid transport system;
fig|6666666.214148.peg.1441	MM4TEC2__C2_L=1925355=	1500240+2258			AlpGlucans	GH77	K00688	starch phosphorylase	EC:2.4.1.1	COG0058	G	Phosphorylase is an important allosteric enzyme in carbohydrate metabolism. Enzymes from different sources differ in their regulatory mechanisms and in their natural substrates. However, all known phosphorylases share catalytic and structural properties (By similarity)							EC 2.4.1.1	Glycogen phosphorylase	Glycogen metabolism;Maltose and Maltodextrin Utilization			MF0066,	glycogen metabolism;	M00565,	Trehalose biosynthesis, D-glucose 1P => trehalose;	Pathway module;	Carbohydrate and lipid metabolism;	Sugar metabolism;
fig|6666666.214148.peg.1442	MM4TEC2__C2_L=1925355=	1502488+1490			AlpGlucans	GH77	K00705	4-alpha-glucanotransferase	EC:2.4.1.25	COG1640	G	4-alpha-glucanotransferase							EC 2.4.1.25	4-alpha-glucanotransferase (amylomaltase)	Glycogen metabolism;Maltose and Maltodextrin Utilization			MF0066,	glycogen metabolism;
fig|6666666.214148.peg.1443	MM4TEC2__C2_L=1925355=	1503993+179																			- none -
fig|6666666.214148.peg.1444	MM4TEC2__C2_L=1925355=	1504513-338																			- none -
fig|6666666.214148.peg.1445	MM4TEC2__C2_L=1925355=	1504645+212																			- none -
fig|6666666.214148.peg.1446	MM4TEC2__C2_L=1925355=	1505671-752								COG1349	K	transcriptional regulator DeoR family									- none -
fig|6666666.214148.peg.1447	MM4TEC2__C2_L=1925355=	1505945-251																			- none -
fig|6666666.214148.peg.1448	MM4TEC2__C2_L=1925355=	1505961+1253					K01813	L-rhamnose isomerase	EC:5.3.1.14	COG4806	G	l-rhamnose isomerase							EC 5.3.1.14	L-rhamnose isomerase	- none -			MF0059,	rhamnose degradation;
fig|6666666.214148.peg.1449	MM4TEC2__C2_L=1925355=	1507290+1610			PlantCW	GH78				ENOG410XRPP	S	Bacterial alpha-L-rhamnosidase							EC 3.2.1.40	Alfa-L-rhamnosidase	- none -
fig|6666666.214148.peg.145	MM4TEC2__C2_L=1925355=	97406-347								ENOG4111UPQ	S	Polyketide cyclase / dehydrase and lipid transport									- none -
fig|6666666.214148.peg.1450	MM4TEC2__C2_L=1925355=	1510326-1391					K07137	uncharacterized protein		COG2509	S	fad dependent oxidoreductase								NAD(FAD)-utilizing dehydrogenase	- none -
fig|6666666.214148.peg.1451	MM4TEC2__C2_L=1925355=	1510785+1739					K01652	acetolactate synthase I/II/III large subunit	EC:2.2.1.6	COG0028	E	acetolactate synthase	Acetolactate_0	Cellular metabolism	Acetolactate synthase large subunit (EC 2.2.1.6)				EC 2.2.1.6	Acetolactate synthase large subunit	Acetolactate synthase subunits;Branched-Chain Amino Acid Biosynthesis					M00570,M00019,	Isoleucine biosynthesis, threonine => 2-oxobutanoate => isoleucine;Valine/isoleucine biosynthesis, pyruvate => valine / 2-oxobutanoate => isoleucine;	Pathway module;	Nucleotide and amino acid metabolism;	Branched-chain amino acid metabolism;
fig|6666666.214148.peg.1452	MM4TEC2__C2_L=1925355=	1512527+512					K01653	acetolactate synthase I/III small subunit	EC:2.2.1.6	COG0440	E	Acetolactate synthase small subunit							EC 2.2.1.6	Acetolactate synthase small subunit	Acetolactate synthase subunits;Branched-Chain Amino Acid Biosynthesis					M00570,M00019,	Isoleucine biosynthesis, threonine => 2-oxobutanoate => isoleucine;Valine/isoleucine biosynthesis, pyruvate => valine / 2-oxobutanoate => isoleucine;	Pathway module;	Nucleotide and amino acid metabolism;	Branched-chain amino acid metabolism;
fig|6666666.214148.peg.1453	MM4TEC2__C2_L=1925355=	1513144+1100																			- none -
fig|6666666.214148.peg.1454	MM4TEC2__C2_L=1925355=	1514531-131																			- none -
fig|6666666.214148.peg.1455	MM4TEC2__C2_L=1925355=	1514736+242								ENOG41123I3	K	DNA-binding helix-turn-helix protein									- none -
fig|6666666.214148.peg.1456	MM4TEC2__C2_L=1925355=	1515093+356								ENOG4112340	S	Hpt domain									- none -
fig|6666666.214148.peg.1457	MM4TEC2__C2_L=1925355=	1515465+2081					K07814	putative two-component system response regulator		COG2199	T	Diguanylate cyclase	Putative_0	Modulate host immune response	Putative regulatory protein					metal dependent phosphohydrolase	- none -	8.A.85
fig|6666666.214148.peg.1458	MM4TEC2__C2_L=1925355=	1517543+2765				GT2				ENOG410XNMH	T	Histidine kinase	Signal_0	Intracellular survival and replication|Invasion	Signal transduction histidine-protein kinase BarA (EC 2.7.13.3)						- none -
fig|6666666.214148.peg.1459	MM4TEC2__C2_L=1925355=	1520354+1757			PlantCW,AnimalCarb	GH2				COG3250	G	hydrolase family 2							EC 3.2.1.23	Beta-galactosidase	Galactosylceramide and Sulfatide metabolism;Lactose and Galactose Uptake and Utilization; <br>Lactose utilization
fig|6666666.214148.peg.146	MM4TEC2__C2_L=1925355=	99840-2372					K07456	DNA mismatch repair protein MutS2		COG1193	L	muts2 protein								Recombination inhibitory protein MutS2	DNA repair, bacterial MutL-MutS system
fig|6666666.214148.peg.1460	MM4TEC2__C2_L=1925355=	1523203-1043					K02529	LacI family transcriptional regulator		COG1609	K	Transcriptional regulator									- none -
fig|6666666.214148.peg.1461	MM4TEC2__C2_L=1925355=	1523379+941					K17319	putative aldouronate transport system permease protein		COG4209	G	Binding-protein-dependent transport systems inner membrane component	N-acetyl-D-glucosamine_0	Virulence	N-acetyl-D-glucosamine ABC transporter, permease protein 1					ABC-type polysaccharide transport system, permease component	- none -	3.A.1	ABC			M00603,	Putative aldouronate transport system;	Structural complex;	Environmental information processing;	Saccharide, polyol, and lipid transport system;
fig|6666666.214148.peg.1462	MM4TEC2__C2_L=1925355=	1524330+902					K17320	putative aldouronate transport system permease protein		COG0395	G	Binding-protein-dependent transport systems inner membrane component								Predicted beta-xyloside ABC transporter, permease component	- none -	3.A.1	ABC			M00603,	Putative aldouronate transport system;	Structural complex;	Environmental information processing;	Saccharide, polyol, and lipid transport system;
fig|6666666.214148.peg.1463	MM4TEC2__C2_L=1925355=	1525258+1670					K17318	putative aldouronate transport system substrate-binding protein		COG1653	G	transporter activity									- none -					M00603,	Putative aldouronate transport system;	Structural complex;	Environmental information processing;	Saccharide, polyol, and lipid transport system;
fig|6666666.214148.peg.1464	MM4TEC2__C2_L=1925355=	1526947+1760					K01183	chitinase	EC:3.2.1.14											Chitinase B	- none -
fig|6666666.214148.peg.1465	MM4TEC2__C2_L=1925355=	1528719+1508			Fructans	GH32	K01193	beta-fructofuranosidase	EC:3.2.1.26	COG1621	G	Hydrolase								Sucrose-6-phosphate hydrolase (EC 3.2.1.B3)	- none -			MF0046,	sucrose degradation;
fig|6666666.214148.peg.1466	MM4TEC2__C2_L=1925355=	1530238+1001					K01599	uroporphyrinogen decarboxylase	EC:4.1.1.37	ENOG410YGBQ	H	methyltransferase									- none -					M00121,	Heme biosynthesis, glutamate => protoheme/siroheme;	Pathway module;	Nucleotide and amino acid metabolism;	Cofactor and vitamin biosynthesis;
fig|6666666.214148.peg.1467	MM4TEC2__C2_L=1925355=	1531249+950			Fructans	GH32	K00847	fructokinase	EC:2.7.1.4	COG0524	G	pfkb domain protein							EC 2.7.1.4	Fructokinase	- none -			MF0046,MF0051,	sucrose degradation;sucrose degradation (Actinobacteria);
fig|6666666.214148.peg.1468	MM4TEC2__C2_L=1925355=	1532160+1622			Fructans	GH32	K01212	levanase	EC:3.2.1.65	COG1621	G	Hydrolase								Sucrose-6-phosphate hydrolase (EC 3.2.1.B3)	- none -
fig|6666666.214148.peg.1469	MM4TEC2__C2_L=1925355=	1533874+875					K13653	AraC family transcriptional regulator		COG2207	K	Transcriptional Regulator AraC Family	DNA-binding_0	Virulence	DNA-binding transcriptional dual regulator SoxS					Transcriptional regulator, AraC family	- none -
fig|6666666.214148.peg.147	MM4TEC2__C2_L=1925355=	102103-2255					K08303	putative protease [EC:3.4.-.-]		COG0826	O	Peptidase U32	Uncharacterized_0	Virulence	Uncharacterized protease YegQ						- none -
fig|6666666.214148.peg.1470	MM4TEC2__C2_L=1925355=	1535283-491																			- none -
fig|6666666.214148.peg.1471	MM4TEC2__C2_L=1925355=	1535426+1031								COG4260	S	virion core protein (Lumpy skin disease									- none -
fig|6666666.214148.peg.1472	MM4TEC2__C2_L=1925355=	1536479+416																			- none -
fig|6666666.214148.peg.1473	MM4TEC2__C2_L=1925355=	1536915+437																			- none -
fig|6666666.214148.peg.1474	MM4TEC2__C2_L=1925355=	1537447+1220					K00972	UDP-N-acetylglucosamine/UDP-N-acetylgalactosamine diphosphorylase [EC:2.7.7.23 2.7.7.83]		COG4284	G	pyrophosphorylase							EC 2.7.7.23	N-acetylglucosamine-1-phosphate uridyltransferase eukaryotic	UDP-N-acetylmuramate from Fructose-6-phosphate Biosynthesis					M00361,	Nucleotide sugar biosynthesis, eukaryotes;	Functional set;	Metabolism;	Nucleotide sugar;
fig|6666666.214148.peg.1475	MM4TEC2__C2_L=1925355=	1539135-431																			- none -
fig|6666666.214148.peg.1476	MM4TEC2__C2_L=1925355=	1539225+245																			- none -
fig|6666666.214148.peg.1477	MM4TEC2__C2_L=1925355=	1539581+1919																			- none -
fig|6666666.214148.peg.1478	MM4TEC2__C2_L=1925355=	1541511+557																			- none -
fig|6666666.214148.peg.1479	MM4TEC2__C2_L=1925355=	1542195+1376								COG0534	V	Mate efflux family protein								Multi antimicrobial extrusion protein (Na(+)/drug antiporter), MATE family of MDR efflux pumps	Multidrug Resistance Efflux Pumps	2.A.66	MOP
fig|6666666.214148.peg.148	MM4TEC2__C2_L=1925355=	104571-2387					K01890	phenylalanyl-tRNA synthetase beta chain	EC:6.1.1.20	COG0072	J	phenylalanyl-tRNA synthetase (beta subunit)							EC 6.1.1.20	Phenylalanyl-tRNA synthetase beta chain	tRNA aminoacylation, Phe					M00359,M00360,	Aminoacyl-tRNA biosynthesis, eukaryotes;Aminoacyl-tRNA biosynthesis, prokaryotes;	Functional set;	Metabolism;	Aminoacyl tRNA;
fig|6666666.214148.peg.1480	MM4TEC2__C2_L=1925355=	1544227-686								ENOG411231N	K	transcriptional regulator, merr family									- none -
fig|6666666.214148.peg.1481	MM4TEC2__C2_L=1925355=	1544309+1301								COG0534	V	Mate efflux family protein								Multi antimicrobial extrusion protein (Na(+)/drug antiporter), MATE family of MDR efflux pumps	Multidrug Resistance Efflux Pumps	2.A.66	MOP
fig|6666666.214148.peg.1482	MM4TEC2__C2_L=1925355=	1545805+2669					K01537	Ca2+-transporting ATPase	EC:3.6.3.8	COG0474	P	P-type atpase	Mg(2+)_0	Virulence	Mg(2+) transport ATPase, P-type (EC 3.6.3.2)					Cation-transporting ATPase	- none -	3.A.3	P-ATPase
fig|6666666.214148.peg.1483	MM4TEC2__C2_L=1925355=	1548588+1601								COG1070	G	Carbohydrate kinase							EC 2.7.1.16	Ribulokinase	- none -
fig|6666666.214148.peg.1484	MM4TEC2__C2_L=1925355=	1550202+701					K03077	L-ribulose-5-phosphate 4-epimerase	EC:5.1.3.4	COG0235	G	Class II aldolase adducin							EC 5.1.3.4	L-ribulose-5-phosphate 4-epimerase	- none -
fig|6666666.214148.peg.1485	MM4TEC2__C2_L=1925355=	1550900+791								COG1082	G	Xylose isomerase domain protein TIM barrel									- none -
fig|6666666.214148.peg.1486	MM4TEC2__C2_L=1925355=	1551784+494					K03088	RNA polymerase sigma-70 factor, ECF subfamily		ENOG4111P1W	K	RNA polymerase sigma factor									- none -
fig|6666666.214148.peg.1487	MM4TEC2__C2_L=1925355=	1552265+644																			- none -
fig|6666666.214148.peg.1488	MM4TEC2__C2_L=1925355=	1552906+1106								ENOG410XZSW	S	NA									- none -
fig|6666666.214148.peg.1489	MM4TEC2__C2_L=1925355=	1554009+179																			- none -
fig|6666666.214148.peg.149	MM4TEC2__C2_L=1925355=	105608-1022					K01889	phenylalanyl-tRNA synthetase alpha chain	EC:6.1.1.20	COG0016	J	phenylalanyL-tRNA synthetase, alpha subunit							EC 6.1.1.20	Phenylalanyl-tRNA synthetase alpha chain	tRNA aminoacylation, Phe					M00359,M00360,	Aminoacyl-tRNA biosynthesis, eukaryotes;Aminoacyl-tRNA biosynthesis, prokaryotes;	Functional set;	Metabolism;	Aminoacyl tRNA;
fig|6666666.214148.peg.1490	MM4TEC2__C2_L=1925355=	1554185+353																			- none -
fig|6666666.214148.peg.1491	MM4TEC2__C2_L=1925355=	1554621+1427					K01810	glucose-6-phosphate isomerase	EC:5.3.1.9	COG0166	G	glucose-6-phosphate isomerase activity				Capsule	Antiphagocytosis|Serum resistance	glucose-6-phosphate isomerase	EC 5.3.1.9	Glucose-6-phosphate isomerase	Glycolysis and Gluconeogenesis			MF0080,	Glycolysis (preparatory phase);	M00001,	Glycolysis (Embden-Meyerhof pathway), glucose => pyruvate;	Pathway module;	Carbohydrate and lipid metabolism;	Central carbohydrate metabolism;
fig|6666666.214148.peg.1492	MM4TEC2__C2_L=1925355=	1556108+431																			- none -
fig|6666666.214148.peg.1493	MM4TEC2__C2_L=1925355=	1557941-1367					K04485	DNA repair protein RadA/Sms		COG1066	O	May play a role in the repair of endogenous alkylation damage (By similarity)								DNA repair protein RadA	DNA repair, bacterial;Proteolysis in bacteria, ATP-dependent
fig|6666666.214148.peg.1494	MM4TEC2__C2_L=1925355=	1559085-1130					K12506	2-C-methyl-D-erythritol 4-phosphate cytidylyltransferase / 2-C-methyl-D-erythritol 2,4-cyclodiphosphate synthase [EC:2.7.7.60 4.6.1.12]		COG1211	I	Catalyzes the formation of 4-diphosphocytidyl-2-C- methyl-D-erythritol from CTP and 2-C-methyl-D-erythritol 4- phosphate (MEP) (By similarity)							EC 4.6.1.12	2-C-methyl-D-erythritol 2,4-cyclodiphosphate synthase	- none -					M00096,M00096,	C5 isoprenoid biosynthesis, non-mevalonate pathway;C5 isoprenoid biosynthesis, non-mevalonate pathway;	Pathway module;	Carbohydrate and lipid metabolism;	Terpenoid backbone biosynthesis;
fig|6666666.214148.peg.1495	MM4TEC2__C2_L=1925355=	1559339-257								COG1188	J	heat shock protein								Ribosome-associated heat shock protein implicated in the recycling of the 50S subunit (S4 paralog)	Cell division-ribosomal stress proteins cluster;Heat shock dnaK gene cluster extended
fig|6666666.214148.peg.1496	MM4TEC2__C2_L=1925355=	1559472-146																			- none -
fig|6666666.214148.peg.1497	MM4TEC2__C2_L=1925355=	1559543+170																			- none -
fig|6666666.214148.peg.1498	MM4TEC2__C2_L=1925355=	1559794+3995					K03043	DNA-directed RNA polymerase subunit beta	EC:2.7.7.6	COG0085	K	DNA-dependent RNA polymerase catalyzes the transcription of DNA into RNA using the four ribonucleoside triphosphates as substrates (By similarity)							EC 2.7.7.6	DNA-directed RNA polymerase beta subunit	Mycobacterium virulence operon involved in DNA transcription;RNA polymerase bacterial					M00183,	RNA polymerase, bacteria;	Structural complex;	Genetic information processing;	RNA polymerase;
fig|6666666.214148.peg.1499	MM4TEC2__C2_L=1925355=	1563808+3656					K03046	DNA-directed RNA polymerase subunit beta'	EC:2.7.7.6	COG0086	K	DNA-dependent RNA polymerase catalyzes the transcription of DNA into RNA using the four ribonucleoside triphosphates as substrates (By similarity)	DNA-directed_0	Virulence	DNA-directed RNA polymerase beta subunit (EC 2.7.7.6)				EC 2.7.7.6	DNA-directed RNA polymerase beta&#39; subunit	Mycobacterium virulence operon involved in DNA transcription;RNA polymerase bacterial					M00183,	RNA polymerase, bacteria;	Structural complex;	Genetic information processing;	RNA polymerase;
fig|6666666.214148.peg.15	MM4TEC2__C1_L=46754=	11586+251																			- none -
fig|6666666.214148.peg.150	MM4TEC2__C2_L=1925355=	105926-128																			- none -
fig|6666666.214148.peg.1500	MM4TEC2__C2_L=1925355=	1567747-236																			- none -
fig|6666666.214148.peg.1501	MM4TEC2__C2_L=1925355=	1567958-116																			- none -
fig|6666666.214148.peg.1502	MM4TEC2__C2_L=1925355=	1567977+746					K07699	two-component system, response regulator, stage 0 sporulation protein A		COG0784	T	response regulator	cheY	Adhesion|Adhesion|Invasion|Two-component system	Chemotaxis regulator - transmits chemoreceptor signals to flagellar motor components CheY						- none -
fig|6666666.214148.peg.1503	MM4TEC2__C2_L=1925355=	1570230-1463					K19350	lincosamide and streptogramin A transport system ATP-binding/permease protein		COG0488	S	(ABC) transporter	Zinc_0	Virulence	Zinc ABC transporter, ATP-binding protein ZnuC					ABC transporter, ATP-binding protein	- none -	3.A.1	ABC
fig|6666666.214148.peg.1504	MM4TEC2__C2_L=1925355=	1570249+245																			- none -
fig|6666666.214148.peg.1505	MM4TEC2__C2_L=1925355=	1570513+962																			- none -
fig|6666666.214148.peg.1506	MM4TEC2__C2_L=1925355=	1571729+371					K02950	small subunit ribosomal protein S12		COG0048	J	Interacts with and stabilizes bases of the 16S rRNA that are involved in tRNA selection in the A site and with the mRNA backbone. Located at the interface of the 30S and 50S subunits, it traverses the body of the 30S subunit contacting proteins on the other side and probably holding the rRNA structure together. The combined cluster of proteins S8, S12 and S17 appears to hold together the shoulder…								SSU ribosomal protein S12p (S23e)	Mycobacterium virulence operon involved in protein synthesis (SSU ribosomal proteins)					M00179,M00178,	Ribosome, archaea;Ribosome, bacteria;	Structural complex;	Genetic information processing;	Ribosome;
fig|6666666.214148.peg.1507	MM4TEC2__C2_L=1925355=	1572290+470					K02992	small subunit ribosomal protein S7		COG0049	J	One of the primary rRNA binding proteins, it binds directly to 16S rRNA where it nucleates assembly of the head domain of the 30S subunit. Is located at the subunit interface close to the decoding center, probably blocks exit of the E-site tRNA (By similarity)								SSU ribosomal protein S7p (S5e)	Mycobacterium virulence operon involved in protein synthesis (SSU ribosomal proteins)					M00179,M00178,	Ribosome, archaea;Ribosome, bacteria;	Structural complex;	Genetic information processing;	Ribosome;
fig|6666666.214148.peg.1508	MM4TEC2__C2_L=1925355=	1572773+2084					K02355	elongation factor G		COG0480	J	Catalyzes the GTP-dependent ribosomal translocation step during translation elongation. During this step, the ribosome changes from the pre-translocational (PRE) to the post- translocational (POST) state as the newly formed A-site-bound peptidyl-tRNA and P-site-bound deacylated tRNA move to the P and E sites, respectively. Catalyzes the coordinated movement of the two tRNA molecules, the mRNA and…								Translation elongation factor G	Mycobacterium virulence operon involved in protein synthesis (SSU ribosomal proteins);Translation elongation factor G family; <br>Translation elongation factors bacterial
fig|6666666.214148.peg.1509	MM4TEC2__C2_L=1925355=	1575043+1220					K02358	elongation factor Tu		COG0050	J	This protein promotes the GTP-dependent binding of aminoacyl-tRNA to the A-site of ribosomes during protein biosynthesis (By similarity)								Translation elongation factor Tu	Mycobacterium virulence operon involved in protein synthesis (SSU ribosomal proteins);Translation elongation factors bacterial
fig|6666666.214148.peg.151	MM4TEC2__C2_L=1925355=	106603-680								ENOG410ZYAS	S	sporulation protein YunB									- none -
fig|6666666.214148.peg.1510	MM4TEC2__C2_L=1925355=	1576333+731					K00661	maltose O-acetyltransferase	EC:2.3.1.79	COG0110	S	acetyltransferase							EC 2.3.1.18	Galactoside O-acetyltransferase	Lactose utilization
fig|6666666.214148.peg.1511	MM4TEC2__C2_L=1925355=	1577245+839																			- none -
fig|6666666.214148.peg.1512	MM4TEC2__C2_L=1925355=	1578104+710					K03091	RNA polymerase sporulation-specific sigma factor		COG1191	K	Sigma factors are initiation factors that promote the attachment of RNA polymerase to specific initiation sites and are then released (By similarity)	RNA_0	Virulence	RNA polymerase sigma factor RpoS					RNA polymerase sporulation specific sigma factor SigE	Transcription initiation, bacterial sigma factors
fig|6666666.214148.peg.1513	MM4TEC2__C2_L=1925355=	1578902+779					K03091	RNA polymerase sporulation-specific sigma factor		COG1191	K	Sigma factors are initiation factors that promote the attachment of RNA polymerase to specific initiation sites and are then released (By similarity)	RNA_0	Regulation of gene expression	RNA polymerase sigma factor SigB					RNA polymerase sporulation specific sigma factor SigG	Transcription initiation, bacterial sigma factors
fig|6666666.214148.peg.1514	MM4TEC2__C2_L=1925355=	1580744-1022					K02103	GntR family transcriptional regulator, arabinose operon transcriptional repressor		COG1609	K	Transcriptional regulator									- none -
fig|6666666.214148.peg.1515	MM4TEC2__C2_L=1925355=	1580947+1001								COG0524	G	pfkb domain protein									- none -
fig|6666666.214148.peg.1516	MM4TEC2__C2_L=1925355=	1581945+551								COG3822	S	Protein of unknown function (DUF1498)							EC 5.3.1.15	D-lyxose isomerase	- none -
fig|6666666.214148.peg.1517	MM4TEC2__C2_L=1925355=	1582500+848					K01624	fructose-bisphosphate aldolase, class II	EC:4.1.2.13	COG0191	G	Aldolase	D-tagatose-1,6-bisphosphate_0	Biofilm	D-tagatose-1,6-bisphosphate aldolase subunit KbaY (EC 4.1.2.40)					Putative aldolase	- none -			MF0080,	Glycolysis (preparatory phase);
fig|6666666.214148.peg.1518	MM4TEC2__C2_L=1925355=	1583457+356								COG1873	S	sporulation protein, YlmC YmxH family									- none -
fig|6666666.214148.peg.1519	MM4TEC2__C2_L=1925355=	1583878+854				CE12				COG0657	I	alpha beta hydrolase fold-3 domain protein									- none -
fig|6666666.214148.peg.152	MM4TEC2__C2_L=1925355=	107777-1097					K01599	uroporphyrinogen decarboxylase	EC:4.1.1.37	ENOG410ZJPG	S	Uroporphyrinogen decarboxylase (URO-D)									- none -					M00121,	Heme biosynthesis, glutamate => protoheme/siroheme;	Pathway module;	Nucleotide and amino acid metabolism;	Cofactor and vitamin biosynthesis;
fig|6666666.214148.peg.1520	MM4TEC2__C2_L=1925355=	1585810-1043				GT28	K02563	UDP-N-acetylglucosamine--N-acetylmuramyl-(pentapeptide) pyrophosphoryl-undecaprenol N-acetylglucosamine transferase	EC:2.4.1.227	COG0707	M	Cell wall formation. Catalyzes the transfer of a GlcNAc subunit on undecaprenyl-pyrophosphoryl-MurNAc-pentapeptide (lipid intermediate I) to form undecaprenyl-pyrophosphoryl-MurNAc- (pentapeptide)GlcNAc (lipid intermediate II) (By similarity)							EC 2.4.1.227	UDP-N-acetylglucosamine--N-acetylmuramyl-(pentapeptide) pyrophosphoryl-undecaprenol N-acetylglucosamine transferase	- none -
fig|6666666.214148.peg.1521	MM4TEC2__C2_L=1925355=	1585947+887								COG2267	I	alpha beta hydrolase fold							EC 3.1.1.5;EC 3.1.1.23	Lysophospholipase ; Monoglyceride lipase ; putative	Triacylglycerol metabolism;Triacylglycerol metabolism
fig|6666666.214148.peg.1522	MM4TEC2__C2_L=1925355=	1586994+1967					K02470	DNA gyrase subunit B	EC:5.99.1.3	COG0187	L	DNA gyrase negatively supercoils closed circular double- stranded DNA in an ATP-dependent manner and also catalyzes the interconversion of other topological isomers of double-stranded DNA rings, including catenanes and knotted rings (By similarity)							EC 5.99.1.3	DNA gyrase subunit B	DNA gyrase subunits;DNA topoisomerases, Type II, ATP-dependent; <br>Resistance to fluoroquinolones
fig|6666666.214148.peg.1523	MM4TEC2__C2_L=1925355=	1588979+2474					K02621	topoisomerase IV subunit A [EC:5.99.1.-]		COG0188	L	DNA gyrase negatively supercoils closed circular double- stranded DNA in an ATP-dependent manner and also catalyzes the interconversion of other topological isomers of double-stranded DNA rings, including catenanes and knotted rings (By similarity)							EC 5.99.1.3	DNA gyrase subunit A	DNA gyrase subunits;DNA topoisomerases, Type II, ATP-dependent; <br>Resistance to fluoroquinolones
fig|6666666.214148.peg.1524	MM4TEC2__C2_L=1925355=	1591666+383																	EC 5.2.1.8	Survival protein SurA precursor (Peptidyl-prolyl cis-trans isomerase SurA)	Peptidyl-prolyl cis-trans isomerase;Periplasmic Stress Response
fig|6666666.214148.peg.1525	MM4TEC2__C2_L=1925355=	1592683+131																			- none -
fig|6666666.214148.peg.1526	MM4TEC2__C2_L=1925355=	1592829+773				CE4				ENOG41112BD	S	Polysaccharide deacetylase	Peptidoglycan-N-acetylmuramic_0	Escape from the phagosome|Defense against host immune response	Peptidoglycan-N-acetylmuramic acid deacetylase PdaC					Polysaccharide deacetylase	Polysaccharide deacetylases
fig|6666666.214148.peg.1527	MM4TEC2__C2_L=1925355=	1593635+698								COG0629	L	single-stranded DNA-binding protein								Single-stranded DNA-binding protein	DNA repair, bacterial
fig|6666666.214148.peg.1528	MM4TEC2__C2_L=1925355=	1595559-1184								COG0025	P	Sodium hydrogen exchanger								Na+/H+-exchanging protein	- none -	2.A.36	2.A.36
fig|6666666.214148.peg.1529	MM4TEC2__C2_L=1925355=	1596620-881								ENOG410XP61	K	Transcriptional regulator								Transcriptional regulator, LysR family	- none -
fig|6666666.214148.peg.153	MM4TEC2__C2_L=1925355=	109028-1229								ENOG410XSKH	Q	Acetyl xylan esterase (AXE1)									- none -
fig|6666666.214148.peg.1530	MM4TEC2__C2_L=1925355=	1596735+497								COG4925	S	NA									- none -
fig|6666666.214148.peg.1531	MM4TEC2__C2_L=1925355=	1597235+587				GT2				COG0110	S	acetyltransferase				Capsule	Antiphagocytosis|Serum resistance	exopolysaccharide biosynthesis protein	EC 2.3.1.79	Maltose O-acetyltransferase	Maltose and Maltodextrin Utilization
fig|6666666.214148.peg.1532	MM4TEC2__C2_L=1925355=	1597815+542								COG0655	S	Nadph-dependent fmn reductase								Iron-sulfur flavoprotein	- none -
fig|6666666.214148.peg.1533	MM4TEC2__C2_L=1925355=	1598492+707																			- none -
fig|6666666.214148.peg.1534	MM4TEC2__C2_L=1925355=	1599186+2612																		Chitin binding protein	- none -
fig|6666666.214148.peg.1535	MM4TEC2__C2_L=1925355=	1601826+3194			PlantCW,AnimalCarb	GH3	K05349	beta-glucosidase	EC:3.2.1.21	COG1472	G	hydrolase family 3	bglX	Virulence	Periplasmic beta-glucosidase (EC 3.2.1.21)				EC 3.2.1.21	Beta-glucosidase	- none -
fig|6666666.214148.peg.1536	MM4TEC2__C2_L=1925355=	1605031+1271								COG1401	V	restriction endodeoxyribonuclease activity									- none -
fig|6666666.214148.peg.1537	MM4TEC2__C2_L=1925355=	1606320+1754								ENOG41128KA	S	NA									- none -
fig|6666666.214148.peg.1538	MM4TEC2__C2_L=1925355=	1608071+1379								COG1401	V	restriction endodeoxyribonuclease activity									- none -
fig|6666666.214148.peg.1539	MM4TEC2__C2_L=1925355=	1609466+2621								COG1305	E	transglutaminase domain-containing protein									- none -
fig|6666666.214148.peg.154	MM4TEC2__C2_L=1925355=	112510-3482																			- none -
fig|6666666.214148.peg.1540	MM4TEC2__C2_L=1925355=	1612106+5546								ENOG410ZVN3	S	conserved repeat domain protein									- none -
fig|6666666.214148.peg.1541	MM4TEC2__C2_L=1925355=	1618758-1004								ENOG410XNSZ	S	NA								no significant homology.	- none -
fig|6666666.214148.peg.1542	MM4TEC2__C2_L=1925355=	1619475-701								COG0822	C	sUF system Fes assembly protein, NifU family								no significant homology.	- none -
fig|6666666.214148.peg.1543	MM4TEC2__C2_L=1925355=	1619696+1214					K01866	tyrosyl-tRNA synthetase	EC:6.1.1.1	COG0162	J	Catalyzes the attachment of tyrosine to tRNA(Tyr) in a two-step reaction tyrosine is first activated by ATP to form Tyr- AMP and then transferred to the acceptor end of tRNA(Tyr) (By similarity)							EC 6.1.1.1	Tyrosyl-tRNA synthetase	tRNA aminoacylation, Tyr					M00359,M00360,	Aminoacyl-tRNA biosynthesis, eukaryotes;Aminoacyl-tRNA biosynthesis, prokaryotes;	Functional set;	Metabolism;	Aminoacyl tRNA;
fig|6666666.214148.peg.1544	MM4TEC2__C2_L=1925355=	1620907+632								COG1739	S	protein family UPF0029, Impact, N-terminal protein								FIG000605: protein co-occurring with transport systems (COG1739)	Transport system clustering with HemG
fig|6666666.214148.peg.1545	MM4TEC2__C2_L=1925355=	1621556+812																			- none -
fig|6666666.214148.peg.1546	MM4TEC2__C2_L=1925355=	1622502+1058					K00826	branched-chain amino acid aminotransferase	EC:2.6.1.42	COG0115	E	brancheD-chain amino acid aminotransferase							EC 2.6.1.42	Branched-chain amino acid aminotransferase	Alanine biosynthesis;Branched-Chain Amino Acid Biosynthesis; <br>Leucine Biosynthesis; <br>Pyruvate Alanine Serine Interconversions					M00119,M00570,M00019,	Pantothenate biosynthesis, valine/L-aspartate => pantothenate;Isoleucine biosynthesis, threonine => 2-oxobutanoate => isoleucine;Valine/isoleucine biosynthesis, pyruvate => valine / 2-oxobutanoate => isoleucine;	Pathway module;	Nucleotide and amino acid metabolism;	Cofactor and vitamin biosynthesis;
fig|6666666.214148.peg.1547	MM4TEC2__C2_L=1925355=	1623557+344																			- none -
fig|6666666.214148.peg.1548	MM4TEC2__C2_L=1925355=	1623953+620					K03565	regulatory protein		COG2137	S	Modulates RecA activity (By similarity)									- none -
fig|6666666.214148.peg.1549	MM4TEC2__C2_L=1925355=	1624576+1496					K17759	NAD(P)H-hydrate epimerase	EC:5.1.99.6	COG0063	G	Together with NAD(P)HX epimerase, which catalyzes the epimerization of the S- and R-forms, the enzyme allows the repair of both epimers of NAD(P)HX, a damaged form of NAD(P)H that is a result of enzymatic or heat-dependent hydration (By similarity)							EC 5.1.99.6;EC 4.2.1.136	NAD(P)H-hydrate epimerase / ADP-dependent (S)-NAD(P)H-hydrate dehydratase	- none -
fig|6666666.214148.peg.155	MM4TEC2__C2_L=1925355=	115936-3368																			- none -
fig|6666666.214148.peg.1550	MM4TEC2__C2_L=1925355=	1626188+350					K07171	mRNA interferase MazF [EC:3.1.-.-]		COG2337	T	Toxic component of a toxin-antitoxin (TA) module (By similarity)								Programmed cell death toxin YdcE	- none -
fig|6666666.214148.peg.1551	MM4TEC2__C2_L=1925355=	1627325-743								COG4905	S	Protein of unknown function (DUF1113)									- none -	3.A.1	ABC
fig|6666666.214148.peg.1552	MM4TEC2__C2_L=1925355=	1627487+1271				GT47	K01939	adenylosuccinate synthase	EC:6.3.4.4	COG0104	F	Plays an important role in the de novo pathway of purine nucleotide biosynthesis	Adenylosuccinate_0	Intracellular survival and replication	Adenylosuccinate synthetase (EC 6.3.4.4)				EC 6.3.4.4	Adenylosuccinate synthetase	Purine conversions					M00049,	Adenine ribonucleotide biosynthesis, IMP => ADP,ATP;	Pathway module;	Nucleotide and amino acid metabolism;	Purine metabolism;
fig|6666666.214148.peg.1553	MM4TEC2__C2_L=1925355=	1628769+1595					K01937	CTP synthase	EC:6.3.4.2	COG0504	F	Catalyzes the ATP-dependent amination of UTP to CTP with either L-glutamine or ammonia as the source of nitrogen (By similarity)							EC 6.3.4.2	CTP synthase	pyrimidine conversions					M00052,	Pyrimidine ribonucleotide biosynthesis, UMP => UDP/UTP,CDP/CTP;	Pathway module;	Nucleotide and amino acid metabolism;	Pyrimidine metabolism;
fig|6666666.214148.peg.1554	MM4TEC2__C2_L=1925355=	1630431+1508								COG4624	C	metallo-sulfur cluster assembly							EC 1.12.7.2	Periplasmic [Fe] hydrogenase	- none -
fig|6666666.214148.peg.1555	MM4TEC2__C2_L=1925355=	1632284-308																			- none -
fig|6666666.214148.peg.1556	MM4TEC2__C2_L=1925355=	1632412+1052								COG3949	S	Membrane									- none -	2.A.120	APC
fig|6666666.214148.peg.1557	MM4TEC2__C2_L=1925355=	1634328-806					K02050	NitT/TauT family transport system permease protein		COG0600	P	Binding-protein-dependent transport systems inner membrane component								Hydroxymethylpyrimidine ABC transporter, transmembrane component	Thiamin biosynthesis	3.A.1	ABC			M00188,	NitT/TauT family transport system;	Structural complex;	Environmental information processing;	Mineral and organic ion transport system;
fig|6666666.214148.peg.1558	MM4TEC2__C2_L=1925355=	1635092-767				GT4	K02049	NitT/TauT family transport system ATP-binding protein		COG1116	P	(ABC) transporter	Choline_0	Stress|Bile resistance|Intracellular survival and replication	Choline ABC transport system, ATP-binding protein OpuBA	FbpABC	Iron uptake|ABC transporter	iron(III) ABC transporter, ATP-binding protein		Hydroxymethylpyrimidine ABC transporter, ATPase component	Thiamin biosynthesis	3.A.1	ABC			M00188,	NitT/TauT family transport system;	Structural complex;	Environmental information processing;	Mineral and organic ion transport system;
fig|6666666.214148.peg.1559	MM4TEC2__C2_L=1925355=	1636193-1010					K02051	NitT/TauT family transport system substrate-binding protein		COG0715	P	(ABC) transporter								ABC transporter, substrate-binding protein	- none -					M00188,	NitT/TauT family transport system;	Structural complex;	Environmental information processing;	Mineral and organic ion transport system;
fig|6666666.214148.peg.156	MM4TEC2__C2_L=1925355=	116901-947																			- none -
fig|6666666.214148.peg.1560	MM4TEC2__C2_L=1925355=	1636410+2621			AnimalCarb,FungalCarbs	GH18	K01873	valyl-tRNA synthetase	EC:6.1.1.9	COG0525	J	amino acids such as threonine, to avoid such errors, it has a posttransfer editing activity that hydrolyzes mischarged Thr-tRNA(Val) in a tRNA-dependent manner (By similarity)							EC 6.1.1.9	Valyl-tRNA synthetase	tRNA aminoacylation, Val					M00359,M00360,	Aminoacyl-tRNA biosynthesis, eukaryotes;Aminoacyl-tRNA biosynthesis, prokaryotes;	Functional set;	Metabolism;	Aminoacyl tRNA;
fig|6666666.214148.peg.1561	MM4TEC2__C2_L=1925355=	1639033+920																			- none -
fig|6666666.214148.peg.1562	MM4TEC2__C2_L=1925355=	1642571-2513																			- none -
fig|6666666.214148.peg.1563	MM4TEC2__C2_L=1925355=	1642607+131																			- none -
fig|6666666.214148.peg.1564	MM4TEC2__C2_L=1925355=	1642824+539																			- none -
fig|6666666.214148.peg.1565	MM4TEC2__C2_L=1925355=	1644065-701																			- none -
fig|6666666.214148.peg.1566	MM4TEC2__C2_L=1925355=	1644180+1430								COG5565	S	DNA packaging protein									- none -
fig|6666666.214148.peg.1567	MM4TEC2__C2_L=1925355=	1645615+260																			- none -
fig|6666666.214148.peg.1568	MM4TEC2__C2_L=1925355=	1645872+1835								ENOG410YA58	S	NA									- none -
fig|6666666.214148.peg.1569	MM4TEC2__C2_L=1925355=	1647726+479																			- none -
fig|6666666.214148.peg.157	MM4TEC2__C2_L=1925355=	117984-1028																			- none -
fig|6666666.214148.peg.1570	MM4TEC2__C2_L=1925355=	1648211+1166								ENOG410YRSE	S	NA									- none -
fig|6666666.214148.peg.1571	MM4TEC2__C2_L=1925355=	1649404+551																			- none -
fig|6666666.214148.peg.1572	MM4TEC2__C2_L=1925355=	1649952+1256																			- none -
fig|6666666.214148.peg.1573	MM4TEC2__C2_L=1925355=	1651205+464																			- none -
fig|6666666.214148.peg.1574	MM4TEC2__C2_L=1925355=	1651822+116																			- none -
fig|6666666.214148.peg.1575	MM4TEC2__C2_L=1925355=	1652050+986					K01989	putative ABC transport system substrate-binding protein		COG2984	S	(ABC) transporter								ABC transporter, substrate-binding protein	- none -	3.A.1	ABC			M00247,	Putative ABC transport system;	Structural complex;	Environmental information processing;	Metallic cation, iron-siderophore and vitamin B12 transport system;
fig|6666666.214148.peg.1576	MM4TEC2__C2_L=1925355=	1653041+932					K05832	putative ABC transport system permease protein		COG4120	S	ABC transporter (permease)								ABC transporter, permease protein	- none -	3.A.1	ABC			M00247,	Putative ABC transport system;	Structural complex;	Environmental information processing;	Metallic cation, iron-siderophore and vitamin B12 transport system;
fig|6666666.214148.peg.1577	MM4TEC2__C2_L=1925355=	1653948+773				GT2	K05833	putative ABC transport system ATP-binding protein		COG1101	S	ABC transporter, (ATP-binding protein)	ATP-dependent_0	Virulence	ATP-dependent efflux pump essential for phthiocerol dimycocerosates translocation, ATP-binding protein DrrA-like					Methionine ABC transporter ATP-binding protein	Methionine Degradation	3.A.1	ABC			M00247,	Putative ABC transport system;	Structural complex;	Environmental information processing;	Metallic cation, iron-siderophore and vitamin B12 transport system;
fig|6666666.214148.peg.1578	MM4TEC2__C2_L=1925355=	1654855+821																			- none -
fig|6666666.214148.peg.1579	MM4TEC2__C2_L=1925355=	1655697+977																		Permease of the drug/metabolite transporter (DMT) superfamily	Queuosine-Archaeosine Biosynthesis
fig|6666666.214148.peg.158	MM4TEC2__C2_L=1925355=	118887-887				GH42	K02026	multiple sugar transport system permease protein		COG0395	G	Binding-protein-dependent transport systems inner membrane component	N-acetyl-D-glucosamine_0	Virulence	N-acetyl-D-glucosamine ABC transporter, permease protein 2					N-Acetyl-D-glucosamine ABC transport system, permease protein 2	- none -	3.A.1	ABC
fig|6666666.214148.peg.1580	MM4TEC2__C2_L=1925355=	1656707+1706					K01835	phosphoglucomutase	EC:5.4.2.2	COG1109	G	Catalyzes the conversion of glucosamine-6-phosphate to glucosamine-1-phosphate (By similarity)	Phosphomannomutase_0	Virulence	Phosphomannomutase (EC 5.4.2.8) => Colanic acid	LOS	Adherence|Endotoxin	probable phosphomannomutase	EC 5.4.2.8	Phosphomannomutase	Mannose Metabolism			MF0051,	sucrose degradation (Actinobacteria);	M00549,	Nucleotide sugar biosynthesis, glucose => UDP-glucose;	Pathway module;	Carbohydrate and lipid metabolism;	Sugar metabolism;
fig|6666666.214148.peg.1581	MM4TEC2__C2_L=1925355=	1662726+398																			- none -
fig|6666666.214148.peg.1582	MM4TEC2__C2_L=1925355=	1663140+698								ENOG4111H48	S	von Willebrand factor type A									- none -
fig|6666666.214148.peg.1583	MM4TEC2__C2_L=1925355=	1663823+710								ENOG410Z1ZC	S	NA									- none -
fig|6666666.214148.peg.1584	MM4TEC2__C2_L=1925355=	1664537+797					K03427	type I restriction enzyme M protein	EC:2.1.1.72	COG1397	O	ADP-ribosylation Crystallin J1							EC 2.1.1.72	Type I restriction-modification system, DNA-methyltransferase subunit M	Restriction-Modification System;Type I Restriction-Modification
fig|6666666.214148.peg.1585	MM4TEC2__C2_L=1925355=	1666186-800								COG2207	K	Transcriptional Regulator AraC Family									- none -
fig|6666666.214148.peg.1586	MM4TEC2__C2_L=1925355=	1666411+1250								ENOG4112B6F	S	NA									- none -
fig|6666666.214148.peg.1587	MM4TEC2__C2_L=1925355=	1667685+1382					K02027	multiple sugar transport system substrate-binding protein		COG1653	G	transporter activity									- none -					M00207,	Putative multiple sugar transport system;	Structural complex;	Environmental information processing;	Saccharide, polyol, and lipid transport system;
fig|6666666.214148.peg.1588	MM4TEC2__C2_L=1925355=	1669064+905					K02025	multiple sugar transport system permease protein		COG1175	P	binding-protein-dependent transport systems inner membrane Component	N-acetyl-D-glucosamine_0	Virulence	N-acetyl-D-glucosamine ABC transporter, permease protein 1						- none -	3.A.1	ABC			M00207,	Putative multiple sugar transport system;	Structural complex;	Environmental information processing;	Saccharide, polyol, and lipid transport system;
fig|6666666.214148.peg.1589	MM4TEC2__C2_L=1925355=	1669959+860				GH130	K02026	multiple sugar transport system permease protein		COG0395	G	Binding-protein-dependent transport systems inner membrane component	N-acetyl-D-glucosamine_0	Virulence	N-acetyl-D-glucosamine ABC transporter, permease protein 1					N-Acetyl-D-glucosamine ABC transport system, permease protein 2	- none -	3.A.1	ABC
fig|6666666.214148.peg.159	MM4TEC2__C2_L=1925355=	119771-884					K10118	raffinose/stachyose/melibiose transport system permease protein		COG1175	P	binding-protein-dependent transport systems inner membrane Component	N-acetyl-D-glucosamine_0	Virulence	N-acetyl-D-glucosamine ABC transporter, permease protein 1						- none -	3.A.1	ABC			M00196,	Raffinose/stachyose/melibiose transport system;	Structural complex;	Environmental information processing;	Saccharide, polyol, and lipid transport system;
fig|6666666.214148.peg.1590	MM4TEC2__C2_L=1925355=	1670834+1988								ENOG410YUDY	S	NA									- none -
fig|6666666.214148.peg.1591	MM4TEC2__C2_L=1925355=	1672879+3482																			- none -
fig|6666666.214148.peg.1592	MM4TEC2__C2_L=1925355=	1676422+2591			PlantCW	GH78	K05989	alpha-L-rhamnosidase	EC:3.2.1.40	ENOG410XNWE	S	K05989 alpha-L-rhamnosidase EC 3.2.1.40							EC 3.2.1.40	Alfa-L-rhamnosidase	- none -
fig|6666666.214148.peg.1593	MM4TEC2__C2_L=1925355=	1678991+1199								ENOG410XSKH	Q	Acetyl xylan esterase (AXE1)									- none -
fig|6666666.214148.peg.1594	MM4TEC2__C2_L=1925355=	1680328+1706																		internalin, putative	Listeria surface proteins: Internalin-like proteins
fig|6666666.214148.peg.1595	MM4TEC2__C2_L=1925355=	1682049+773																			- none -
fig|6666666.214148.peg.1596	MM4TEC2__C2_L=1925355=	1682827+182																			- none -
fig|6666666.214148.peg.1597	MM4TEC2__C2_L=1925355=	1683336+3809																			- none -
fig|6666666.214148.peg.1598	MM4TEC2__C2_L=1925355=	1687205+4925																			- none -
fig|6666666.214148.peg.1599	MM4TEC2__C2_L=1925355=	1692237+269																			- none -
fig|6666666.214148.peg.16	MM4TEC2__C1_L=46754=	12446+410																			- none -
fig|6666666.214148.peg.160	MM4TEC2__C2_L=1925355=	121309-1520					K02027	multiple sugar transport system substrate-binding protein		COG1653	G	transporter activity									- none -					M00207,	Putative multiple sugar transport system;	Structural complex;	Environmental information processing;	Saccharide, polyol, and lipid transport system;
fig|6666666.214148.peg.1600	MM4TEC2__C2_L=1925355=	1692514+1205																			- none -
fig|6666666.214148.peg.1601	MM4TEC2__C2_L=1925355=	1693809+2753					K02035	peptide/nickel transport system substrate-binding protein		COG0747	E	Extracellular solute-binding protein, family 5								Oligopeptide ABC transporter, periplasmic oligopeptide-binding protein OppA (TC 3.A.1.5.1)	ABC transporter oligopeptide (TC 3.A.1.5.1)					M00239,	Peptides/nickel transport system;	Structural complex;	Environmental information processing;	Peptide and nickel transport system;
fig|6666666.214148.peg.1602	MM4TEC2__C2_L=1925355=	1696587+995					K02033	peptide/nickel transport system permease protein		COG0601	P	Binding-protein-dependent transport systems inner membrane component	Oligopeptide_0	Intracellular survival and replication	Oligopeptide transport system permease protein OppB (TC 3.A.1.5.1)					Oligopeptide transport system permease protein OppB (TC 3.A.1.5.1)	ABC transporter oligopeptide (TC 3.A.1.5.1)	3.A.1	ABC			M00239,	Peptides/nickel transport system;	Structural complex;	Environmental information processing;	Peptide and nickel transport system;
fig|6666666.214148.peg.1603	MM4TEC2__C2_L=1925355=	1697592+1166					K02034	peptide/nickel transport system permease protein		COG1173	P	Binding-protein-dependent transport systems inner membrane component	Dipeptide_0	Virulence	Dipeptide transport system permease protein DppC (TC 3.A.1.5.2)					Oligopeptide transport system permease protein OppC (TC 3.A.1.5.1)	ABC transporter oligopeptide (TC 3.A.1.5.1)	3.A.1	ABC			M00239,	Peptides/nickel transport system;	Structural complex;	Environmental information processing;	Peptide and nickel transport system;
fig|6666666.214148.peg.1604	MM4TEC2__C2_L=1925355=	1698762+1334				GT4	K02031	peptide/nickel transport system ATP-binding protein		COG0444	EP	(ABC) transporter	Dipeptide_0	Virulence	Dipeptide transport ATP-binding protein DppD (TC 3.A.1.5.2)					Oligopeptide transport ATP-binding protein OppD (TC 3.A.1.5.1)	ABC transporter oligopeptide (TC 3.A.1.5.1)	3.A.1	ABC			M00239,	Peptides/nickel transport system;	Structural complex;	Environmental information processing;	Peptide and nickel transport system;
fig|6666666.214148.peg.1605	MM4TEC2__C2_L=1925355=	1700093+1016				GT4	K02032	peptide/nickel transport system ATP-binding protein		COG4608	E	(ABC) transporter	Dipeptide_0	Virulence	Dipeptide transport ATP-binding protein DppD (TC 3.A.1.5.2)					Oligopeptide transport ATP-binding protein OppF (TC 3.A.1.5.1)	ABC transporter oligopeptide (TC 3.A.1.5.1)	3.A.1	ABC			M00239,	Peptides/nickel transport system;	Structural complex;	Environmental information processing;	Peptide and nickel transport system;
fig|6666666.214148.peg.1606	MM4TEC2__C2_L=1925355=	1701120+7361					K01361	lactocepin	EC:3.4.21.96	COG5492	N	ig domain protein group 2 domain protein				C5a peptidase	Immune evasion|Complement protease|Adherence|Surface-associated adhesin	C5a peptidase precursor			- none -
fig|6666666.214148.peg.1607	MM4TEC2__C2_L=1925355=	1708585+953								ENOG410ZWP3	K	Transcriptional regulator (AraC family)									- none -
fig|6666666.214148.peg.1608	MM4TEC2__C2_L=1925355=	1709645+2354			PlantCW	GH78	K05989	alpha-L-rhamnosidase	EC:3.2.1.40												- none -
fig|6666666.214148.peg.1609	MM4TEC2__C2_L=1925355=	1712000+1616								ENOG410YQGU	G	extracellular solute-binding protein, family 1									- none -
fig|6666666.214148.peg.161	MM4TEC2__C2_L=1925355=	124251-2924				GH0				ENOG410XT3T	S	hydrolase family 2, sugar binding									- none -
fig|6666666.214148.peg.1610	MM4TEC2__C2_L=1925355=	1713653+2702								COG5492	N	ig domain protein group 2 domain protein									- none -
fig|6666666.214148.peg.1611	MM4TEC2__C2_L=1925355=	1716431+1955					K10118	raffinose/stachyose/melibiose transport system permease protein		COG2319	S	wd repeat	N-acetyl-D-glucosamine_0	Virulence	N-acetyl-D-glucosamine ABC transporter, permease protein 1						- none -	3.A.1	ABC			M00196,	Raffinose/stachyose/melibiose transport system;	Structural complex;	Environmental information processing;	Saccharide, polyol, and lipid transport system;
fig|6666666.214148.peg.1612	MM4TEC2__C2_L=1925355=	1718399+845				GH130	K02026	multiple sugar transport system permease protein		COG0395	G	Binding-protein-dependent transport systems inner membrane component	N-acetyl-D-glucosamine_0	Virulence	N-acetyl-D-glucosamine ABC transporter, permease protein 2						- none -	3.A.1	ABC
fig|6666666.214148.peg.1613	MM4TEC2__C2_L=1925355=	1719263+1856								ENOG410YUDY	S	NA									- none -
fig|6666666.214148.peg.1614	MM4TEC2__C2_L=1925355=	1721121+1799								ENOG410YUDY	S	NA									- none -
fig|6666666.214148.peg.1615	MM4TEC2__C2_L=1925355=	1723757-782			PlantCW	GH39				COG2207	K	Transcriptional Regulator AraC Family									- none -
fig|6666666.214148.peg.1616	MM4TEC2__C2_L=1925355=	1723895+1055				GH0				COG0673	S	oxidoreductase				LPS	Endotoxin	probable oxidoreductase	EC 1.1.1.18	Myo-inositol 2-dehydrogenase	- none -
fig|6666666.214148.peg.1617	MM4TEC2__C2_L=1925355=	1724947+722								COG4813	G	Trehalose utilization protein									- none -
fig|6666666.214148.peg.1618	MM4TEC2__C2_L=1925355=	1725853-116																			- none -
fig|6666666.214148.peg.1619	MM4TEC2__C2_L=1925355=	1725865+3158								ENOG4111TEE	S	repeat protein									- none -
fig|6666666.214148.peg.162	MM4TEC2__C2_L=1925355=	125545-1235								ENOG4112B6F	S	NA									- none -
fig|6666666.214148.peg.1620	MM4TEC2__C2_L=1925355=	1729141+1472					K02027	multiple sugar transport system substrate-binding protein		COG1653	G	transporter activity									- none -					M00207,	Putative multiple sugar transport system;	Structural complex;	Environmental information processing;	Saccharide, polyol, and lipid transport system;
fig|6666666.214148.peg.1621	MM4TEC2__C2_L=1925355=	1730634+962					K02025	multiple sugar transport system permease protein		COG1175	P	binding-protein-dependent transport systems inner membrane Component	N-acetyl-D-glucosamine_0	Virulence	N-acetyl-D-glucosamine ABC transporter, permease protein 1						- none -	3.A.1	ABC			M00207,	Putative multiple sugar transport system;	Structural complex;	Environmental information processing;	Saccharide, polyol, and lipid transport system;
fig|6666666.214148.peg.1622	MM4TEC2__C2_L=1925355=	1731598+890				GH130	K10194	oligogalacturonide transport system permease protein		COG0395	G	Binding-protein-dependent transport systems inner membrane component	Maltodextrin_0	Virulence	Maltodextrin ABC transporter, permease protein MdxG						- none -	3.A.1	ABC
fig|6666666.214148.peg.1623	MM4TEC2__C2_L=1925355=	1732497+1904								ENOG410YUDY	S	NA									- none -
fig|6666666.214148.peg.1624	MM4TEC2__C2_L=1925355=	1734419+1895								ENOG410YUDY	S	NA									- none -
fig|6666666.214148.peg.1625	MM4TEC2__C2_L=1925355=	1737393-1040			PlantCW,AnimalCarb	GH1	K01809	mannose-6-phosphate isomerase	EC:5.3.1.8	COG1482	G	mannose-6-phosphate isomerase							EC 5.3.1.8	Mannose-6-phosphate isomerase	Mannose Metabolism			MF0061,	mannose degradation;
fig|6666666.214148.peg.1626	MM4TEC2__C2_L=1925355=	1738745-1352					K11214	sedoheptulokinase	EC:2.7.1.14	ENOG4110XMY	G	Carbohydrate kinase									- none -
fig|6666666.214148.peg.1627	MM4TEC2__C2_L=1925355=	1741123-2369					K00656	formate C-acetyltransferase	EC:2.3.1.54	COG1882	C	formate acetyltransferase	2-ketobutyrate_0	Virulence	2-ketobutyrate formate-lyase (EC 2.3.1.-) Pyruvate formate-lyase (EC 2.3.1.54)				EC 2.3.1.54	Pyruvate formate-lyase	Fermentations: Mixed acid			MF0001,MF0030,MF0085,	ethanol production (formate pathway);threonine degradation (formate pathway);pyruvate:formate lyase;
fig|6666666.214148.peg.1628	MM4TEC2__C2_L=1925355=	1741848-713					K04069	pyruvate formate lyase activating enzyme	EC:1.97.1.4	COG1180	O	activating enzyme	pflA	Virulence	Pyruvate formate-lyase activating enzyme (EC 1.97.1.4)				EC 1.97.1.4	Pyruvate formate-lyase activating enzyme	Fermentations: Mixed acid
fig|6666666.214148.peg.1629	MM4TEC2__C2_L=1925355=	1742001+1112								COG1940	G	ROK family	ROK_0	Cellular metabolism	ROK family sugar kinase or transcriptional regulator						- none -
fig|6666666.214148.peg.163	MM4TEC2__C2_L=1925355=	128115-2456			AnimalCarb	GH38	K01191	alpha-mannosidase	EC:3.2.1.24	COG0383	G	alpha-mannosidase							EC 3.2.1.24	Alpha-mannosidase	Mannose Metabolism
fig|6666666.214148.peg.1630	MM4TEC2__C2_L=1925355=	1743114+611				GT4	K03271	D-sedoheptulose 7-phosphate isomerase	EC:5.3.1.28	COG0279	G	D-glycero-D-manno-heptose 7-phosphate metabolic process	gmhA	Virulence	D-sedoheptulose 7-phosphate isomerase (EC 5.3.1.28)	Capsule I	Antiphagocytosis	phosphoheptose isomerase		Phosphoheptose isomerase (EC 5.3.1.-)	- none -
fig|6666666.214148.peg.1631	MM4TEC2__C2_L=1925355=	1743889+380								COG0640	K	Transcriptional regulator, arsr family								Cadmium efflux system accessory protein	Cadmium resistance
fig|6666666.214148.peg.1632	MM4TEC2__C2_L=1925355=	1744284+2132					K01534	Cd2+/Zn2+-exporting ATPase [EC:3.6.3.3 3.6.3.5]		COG2217	P	p-type ATPase	Lead,_0	Virulence	Lead, cadmium, zinc and mercury transporting ATPase (EC 3.6.3.3) (EC 3.6.3.5)| Copper-translocating P-type ATPase (EC 3.6.3.4)				EC 3.6.3.3;EC 3.6.3.5;EC 3.6.3.4	Lead, cadmium, zinc and mercury transporting ATPase ; Copper-translocating P-type ATPase	Copper Transport System;Copper homeostasis	3.A.3	P-ATPase
fig|6666666.214148.peg.1633	MM4TEC2__C2_L=1925355=	1746572+1547					K06901	putative MFS transporter, AGZA family, xanthine/uracil permease		COG2252	S	Xanthine uracil vitamin C permease								Xanthine/uracil/thiamine/ascorbate permease family protein	Purine Utilization	2.A.40	APC
fig|6666666.214148.peg.1634	MM4TEC2__C2_L=1925355=	1748233+1709				CE9	K01486	adenine deaminase	EC:3.5.4.2	COG1001	F	adenine deaminase							EC 3.5.4.2	Adenine deaminase	Purine conversions
fig|6666666.214148.peg.1635	MM4TEC2__C2_L=1925355=	1750550-560								ENOG41126IB	K	Transcriptional regulator								Transcriptional regulator	- none -
fig|6666666.214148.peg.1636	MM4TEC2__C2_L=1925355=	1750549+161																			- none -
fig|6666666.214148.peg.1637	MM4TEC2__C2_L=1925355=	1750707+2795								COG1033	S	RND superfamily									- none -
fig|6666666.214148.peg.1638	MM4TEC2__C2_L=1925355=	1753605+779					K03609	septum site-determining protein MinD		COG2894	D	site-determining protein				Flagella	Secretion system|Invasion|Motility	ParA family ATPase		Septum site-determining protein MinD	Bacterial Cytoskeleton;Septum site-determining cluster Min	3.A.1	ABC
fig|6666666.214148.peg.1639	MM4TEC2__C2_L=1925355=	1754394+233																			- none -
fig|6666666.214148.peg.164	MM4TEC2__C2_L=1925355=	129176-1064					K02529	LacI family transcriptional regulator		COG1609	K	Transcriptional regulator				BopD	Biofilm formation	LacI family sugar-binding transcriptional regulator			- none -
fig|6666666.214148.peg.1640	MM4TEC2__C2_L=1925355=	1754769+2123					K00527	ribonucleoside-triphosphate reductase	EC:1.17.4.2	COG1328	F	Anaerobic ribonucleoside-triphosphate reductase							EC 1.17.4.2	Ribonucleotide reductase of class III (anaerobic), large subunit	Ribonucleotide reduction					M00053,	Pyrimidine deoxyribonuleotide biosynthesis, CDP/CTP => dCDP/dCTP,dTDP/dTTP;	Pathway module;	Nucleotide and amino acid metabolism;	Pyrimidine metabolism;
fig|6666666.214148.peg.1641	MM4TEC2__C2_L=1925355=	1756921+533					K04068	anaerobic ribonucleoside-triphosphate reductase activating protein	EC:1.97.1.4	COG0602	O	Catalyzes the conversion of 6-carboxy-5,6,7,8- tetrahydropterin (CPH4) to 7-carboxy-7-deazaguanine (CDG) (By similarity)							EC 1.97.1.4	Ribonucleotide reductase of class III (anaerobic), activating protein	Ribonucleotide reduction
fig|6666666.214148.peg.1642	MM4TEC2__C2_L=1925355=	1757498+458					K01520	dUTP pyrophosphatase	EC:3.6.1.23	COG0756	F	This enzyme is involved in nucleotide metabolism it produces dUMP, the immediate precursor of thymidine nucleotides and it decreases the intracellular concentration of dUTP so that uracil cannot be incorporated into DNA (By similarity)							EC 3.6.1.23	Deoxyuridine 5&#39;-triphosphate nucleotidohydrolase	Housecleaning nucleoside triphosphate pyrophosphatases;Nudix proteins (nucleoside triphosphate hydrolases)					M00053,	Pyrimidine deoxyribonuleotide biosynthesis, CDP/CTP => dCDP/dCTP,dTDP/dTTP;	Pathway module;	Nucleotide and amino acid metabolism;	Pyrimidine metabolism;
fig|6666666.214148.peg.1643	MM4TEC2__C2_L=1925355=	1758015+164																		Rubredoxin	Rubrerythrin
fig|6666666.214148.peg.1644	MM4TEC2__C2_L=1925355=	1758311+956					K13292	phosphatidylglycerol:prolipoprotein diacylglycerol transferase [EC:2.-.-.-]		COG0682	M	Transfers the N-acyl diglyceride group on what will become the N-terminal cysteine of membrane lipoproteins (By similarity)	Prolipoprotein_0	Intracellular survival and replication|Invasion|Intracellular survival and replication|Modulate host immune response	Prolipoprotein diacylglyceryl transferase					Prolipoprotein diacylglyceryl transferase (EC 2.4.99.-)	Lipoprotein Biosynthesis
fig|6666666.214148.peg.1645	MM4TEC2__C2_L=1925355=	1759269+1439					K00763	nicotinate phosphoribosyltransferase	EC:6.3.4.21	COG1488	H	Nicotinate phosphoribosyltransferase							EC 6.3.4.21	Nicotinate phosphoribosyltransferase	- none -
fig|6666666.214148.peg.1646	MM4TEC2__C2_L=1925355=	1760701+566																			- none -
fig|6666666.214148.peg.1647	MM4TEC2__C2_L=1925355=	1761282+560					K03101	signal peptidase II	EC:3.4.23.36	COG0597	MU	This protein specifically catalyzes the removal of signal peptides from prolipoproteins (By similarity)	lspA	Escape from the phagosome	Lipoprotein signal peptidase (EC 3.4.23.36)	Lsp	Peptidase	signal peptidase II	EC 3.4.23.36	Lipoprotein signal peptidase	Lipoprotein Biosynthesis;Signal peptidase	9.B.105	Phosphatase
fig|6666666.214148.peg.1648	MM4TEC2__C2_L=1925355=	1761835+935					K06180	23S rRNA pseudouridine1911/1915/1917 synthase	EC:5.4.99.23	COG0564	J	pseudouridine synthase activity							EC 5.4.99.23	Ribosomal large subunit pseudouridine synthase D	- none -
fig|6666666.214148.peg.1649	MM4TEC2__C2_L=1925355=	1762764+536					K02825	pyrimidine operon attenuation protein / uracil phosphoribosyltransferase	EC:2.4.2.9	COG2065	F	Also displays a weak uracil phosphoribosyltransferase activity which is not physiologically significant (By similarity)							EC 2.4.2.9	Uracil phosphoribosyltransferase / Pyrimidine operon regulatory protein PyrR	De Novo Pyrimidine Synthesis;De Novo Pyrimidine Synthesis; <br>pyrimidine conversions
fig|6666666.214148.peg.165	MM4TEC2__C2_L=1925355=	129737-380					K06407	stage V sporulation protein AE		ENOG4111UXX	S	Stage v sporulation protein ae								Stage V sporulation protein AE1 (SpoVAE1)	- none -
fig|6666666.214148.peg.1650	MM4TEC2__C2_L=1925355=	1763383+299																			- none -
fig|6666666.214148.peg.1651	MM4TEC2__C2_L=1925355=	1763784+1322					K03977	GTPase		COG1160	S	GTPase that plays an essential role in the late steps of ribosome biogenesis (By similarity)								GTP-binding protein EngA	- none -
fig|6666666.214148.peg.1652	MM4TEC2__C2_L=1925355=	1765117+728					K08591	glycerol-3-phosphate acyltransferase PlsY	EC:2.3.1.15	COG0344	S	Catalyzes the transfer of an acyl group from acyl- phosphate (acyl-PO(4)) to glycerol-3-phosphate (G3P) to form lysophosphatidic acid (LPA). This enzyme utilizes acyl-phosphate as fatty acyl donor, but not acyl-CoA or acyl-ACP (By similarity)								Acyl-phosphate:glycerol-3-phosphate O-acyltransferase PlsY	Glycerolipid and Glycerophospholipid Metabolism in Bacteria	9.B.31	9.B.31			M00089,	Triacylglycerol biosynthesis;	Pathway module;	Carbohydrate and lipid metabolism;	Lipid metabolism;
fig|6666666.214148.peg.1653	MM4TEC2__C2_L=1925355=	1765921+1478					K06398	stage IV sporulation protein A		ENOG410XQ51	S	ATPase. Has a role at an early stage in the morphogenesis of the spore coat (By similarity)								Stage IV sporulation protein A	- none -
fig|6666666.214148.peg.1654	MM4TEC2__C2_L=1925355=	1767501+1712				GT2	K06147	ATP-binding cassette, subfamily B, bacterial		COG1132	V	(ABC) transporter	Efflux_0	Virulence	Efflux ABC transporter, permeaseATP-binding protein SCO2464	LOS	Adherence|Endotoxin	lipid A export ATP-binding/permease protein		Lipid A export ATP-binding/permease protein MsbA	- none -	3.A.1	ABC
fig|6666666.214148.peg.1655	MM4TEC2__C2_L=1925355=	1769210+1793				GT4	K06147	ATP-binding cassette, subfamily B, bacterial		COG1132	V	(ABC) transporter	Efflux_0	Virulence	Efflux ABC transporter, permeaseATP-binding protein SCO2464	LOS	Adherence|Endotoxin	lipid A export ATP-binding/permease protein		ABC transporter, ATP-binding/permease protein	- none -	3.A.1	ABC
fig|6666666.214148.peg.1656	MM4TEC2__C2_L=1925355=	1771168-131																			- none -
fig|6666666.214148.peg.1657	MM4TEC2__C2_L=1925355=	1772428-1154					K00058	D-3-phosphoglycerate dehydrogenase	EC:1.1.1.95	COG0111	E	Dehydrogenase	D-3-phosphoglycerate_0	Virulence	D-3-phosphoglycerate dehydrogenase (EC 1.1.1.95)				EC 1.1.1.95	D-3-phosphoglycerate dehydrogenase	Pyridoxin (Vitamin B6) Biosynthesis;Serine Biosynthesis					M00020,	Serine biosynthesis, glycerate-3P => serine;	Pathway module;	Nucleotide and amino acid metabolism;	Serine and threonine metabolism;
fig|6666666.214148.peg.1658	MM4TEC2__C2_L=1925355=	1773513-1073					K00831	phosphoserine aminotransferase	EC:2.6.1.52	COG1932	E	Catalyzes the reversible conversion of 3- phosphohydroxypyruvate to phosphoserine and of 3-hydroxy-2-oxo-4- phosphonooxybutanoate to phosphohydroxythreonine (By similarity)	serC	Intracellular survival and replication	Phosphoserine aminotransferase (EC 2.6.1.52)				EC 2.6.1.52	Phosphoserine aminotransferase	Pyridoxin (Vitamin B6) Biosynthesis;Serine Biosynthesis					M00020,	Serine biosynthesis, glycerate-3P => serine;	Pathway module;	Nucleotide and amino acid metabolism;	Serine and threonine metabolism;
fig|6666666.214148.peg.1659	MM4TEC2__C2_L=1925355=	1773536+170																			- none -
fig|6666666.214148.peg.166	MM4TEC2__C2_L=1925355=	130738-995					K06406	stage V sporulation protein AD		ENOG410XNPK	S	stage V sporulation protein ad								Stage V sporulation protein AD (SpoVAD)	- none -	9.A.11	9.A.11
fig|6666666.214148.peg.1660	MM4TEC2__C2_L=1925355=	1773784+1967																			- none -
fig|6666666.214148.peg.1661	MM4TEC2__C2_L=1925355=	1775993+2063					K12574	ribonuclease J [EC:3.1.-.-]		COG0595	S	Metallo-Beta-Lactamase								Ribonuclease J2 (endoribonuclease in RNA processing)	Ribonucleases in Bacillus
fig|6666666.214148.peg.1662	MM4TEC2__C2_L=1925355=	1778104+617								COG4122	S	O-methyltransferase									- none -
fig|6666666.214148.peg.1663	MM4TEC2__C2_L=1925355=	1778726+1223					K08303	putative protease [EC:3.4.-.-]		COG0826	O	Peptidase U32	Uncharacterized_0	Virulence	Uncharacterized protease YegQ					peptidase, U32 family large subunit [C1]	- none -
fig|6666666.214148.peg.1664	MM4TEC2__C2_L=1925355=	1779965+575																			- none -
fig|6666666.214148.peg.1665	MM4TEC2__C2_L=1925355=	1780543+1262					K02346	DNA polymerase IV	EC:2.7.7.7	COG0389	L	Poorly processive error-prone DNA polymerase involved in untargeted mutagenesis. Copies undamaged DNA at stalled replication forks which arise in vivo from mismatched or misaligned primer ends. These misaligned primers can be extended by polIV. Exhibits no 3-5 exonuclease (proofreading) activity. May be involved in translesional synthesis in conjunction with the beta clamp from polIII (By similar…	DNA_0	Virulence	DNA polymerase IV (EC 2.7.7.7)				EC 2.7.7.7	DNA polymerase IV	DNA repair, bacterial
fig|6666666.214148.peg.1666	MM4TEC2__C2_L=1925355=	1782071-227																			- none -
fig|6666666.214148.peg.1667	MM4TEC2__C2_L=1925355=	1782294+2087					K01915	glutamine synthetase	EC:6.3.1.2	COG3968	E	glutamine synthetase							EC 6.3.1.2	Glutamine synthetase type III, GlnN	Ammonia assimilation;Glutamine, Glutamate, Aspartate and Asparagine Biosynthesis; <br>Glutamine synthetases			MF0103,	nitrate reduction (assimilatory);
fig|6666666.214148.peg.1668	MM4TEC2__C2_L=1925355=	1784492+824					K00945	cytidylate kinase	EC:2.7.4.14	ENOG410XQM5	O	Radical S-adenosyl methionine domain containing 2									- none -					M00052,	Pyrimidine ribonucleotide biosynthesis, UMP => UDP/UTP,CDP/CTP;	Pathway module;	Nucleotide and amino acid metabolism;	Pyrimidine metabolism;
fig|6666666.214148.peg.1669	MM4TEC2__C2_L=1925355=	1785318+830								COG0037	D	Ligates lysine onto the cytidine present at position 34 of the AUA codon-specific tRNA(Ile) that contains the anticodon CAU, in an ATP-dependent manner. Cytidine is converted to lysidine, thus changing the amino acid specificity of the tRNA from methionine to isoleucine (By similarity)								tRNA(Cytosine32)-2-thiocytidine synthetase	- none -
fig|6666666.214148.peg.167	MM4TEC2__C2_L=1925355=	130869+1406					K00764	amidophosphoribosyltransferase	EC:2.4.2.14	COG0034	F	glutamine phosphoribosylpyrophosphate amidotransferase							EC 2.4.2.14	Amidophosphoribosyltransferase	De Novo Purine Biosynthesis					M00048,	Inosine monophosphate biosynthesis, PRPP + glutamine => IMP;	Pathway module;	Nucleotide and amino acid metabolism;	Purine metabolism;
fig|6666666.214148.peg.1670	MM4TEC2__C2_L=1925355=	1788025-1835								ENOG410ZVKU	S	Predicted membrane protein (DUF2207)									- none -
fig|6666666.214148.peg.1671	MM4TEC2__C2_L=1925355=	1788623-587					K03744	LemA protein		COG1704	S	LemA family								LemA protein	- none -
fig|6666666.214148.peg.1672	MM4TEC2__C2_L=1925355=	1789175-446								ENOG410XUB6	K	Transcriptional regulator, MarR Family									- none -
fig|6666666.214148.peg.1673	MM4TEC2__C2_L=1925355=	1789348+1766					K06147	ATP-binding cassette, subfamily B, bacterial		COG1132	V	(ABC) transporter	ABC_0	Virulence	ABC transporter protein IroC	LOS	Adherence|Endotoxin	lipid A export ATP-binding/permease protein		Lipid A export ATP-binding/permease protein MsbA	- none -	3.A.1	ABC
fig|6666666.214148.peg.1674	MM4TEC2__C2_L=1925355=	1791107+1838				GT4	K06147	ATP-binding cassette, subfamily B, bacterial		COG1132	V	(ABC) transporter	Efflux_0	Virulence	Efflux ABC transporter, permeaseATP-binding protein SCO2464	LOS	Adherence|Endotoxin	lipid A export ATP-binding/permease protein		probable permease protein of ABC transporter system	- none -	3.A.1	ABC
fig|6666666.214148.peg.1675	MM4TEC2__C2_L=1925355=	1793038+758								COG1432	S	conserved protein									- none -
fig|6666666.214148.peg.1676	MM4TEC2__C2_L=1925355=	1793802+188																			- none -
fig|6666666.214148.peg.1677	MM4TEC2__C2_L=1925355=	1794185+467								ENOG410XUB6	K	Transcriptional regulator, MarR Family									- none -
fig|6666666.214148.peg.1678	MM4TEC2__C2_L=1925355=	1794681+2714				GT4	K02004	putative ABC transport system permease protein		COG1136	V	(ABC) transporter	AttE_0	Survival inside the host derived vacuole	AttE component of AttEFGH ABC transport system					putative ABC transporter, membrane protein subunit and ATP-binding protein	- none -	3.A.1	ABC			M00258,	Putative ABC transport system;	Structural complex;	Environmental information processing;	ABC-2 type and other transport systems;
fig|6666666.214148.peg.1679	MM4TEC2__C2_L=1925355=	1797523+914					K03517	quinolinate synthase	EC:2.5.1.72	COG0379	H	Catalyzes the condensation of iminoaspartate with dihydroxyacetone phosphate to form quinolinate (By similarity)							EC 2.5.1.72	Quinolinate synthetase	Mycobacterium virulence operon possibly involved in quinolinate biosynthesis;NAD and NADP cofactor biosynthesis global					M00115,	NAD biosynthesis, aspartate => NAD;	Pathway module;	Nucleotide and amino acid metabolism;	Cofactor and vitamin biosynthesis;
fig|6666666.214148.peg.168	MM4TEC2__C2_L=1925355=	132774-452					K06405	stage V sporulation protein AC		ENOG4111PFY	S	Stage v sporulation protein ac								Stage V sporulation protein AC (SpoVAC)	- none -	9.A.11	9.A.11
fig|6666666.214148.peg.1680	MM4TEC2__C2_L=1925355=	1798434+1283					K00278	L-aspartate oxidase	EC:1.4.3.16	COG0029	H	L-aspartate oxidase							EC 1.4.3.16	L-aspartate oxidase	Mycobacterium virulence operon possibly involved in quinolinate biosynthesis;NAD and NADP cofactor biosynthesis global	3.D.10	3.D.10			M00115,	NAD biosynthesis, aspartate => NAD;	Pathway module;	Nucleotide and amino acid metabolism;	Cofactor and vitamin biosynthesis;
fig|6666666.214148.peg.1681	MM4TEC2__C2_L=1925355=	1799710+857				GT4	K00767	nicotinate-nucleotide pyrophosphorylase (carboxylating)	EC:2.4.2.19	COG0157	H	nicotinate-nucleotide diphosphorylase (carboxylating) activity							EC 2.4.2.19	Quinolinate phosphoribosyltransferase [decarboxylating]	Mycobacterium virulence operon possibly involved in quinolinate biosynthesis;NAD and NADP cofactor biosynthesis global					M00115,	NAD biosynthesis, aspartate => NAD;	Pathway module;	Nucleotide and amino acid metabolism;	Cofactor and vitamin biosynthesis;
fig|6666666.214148.peg.1682	MM4TEC2__C2_L=1925355=	1800593+503					K07105	uncharacterized protein		COG1827	K	domain protein								Transcriptional repressor for NAD biosynthesis in gram-positives	NAD and NADP cofactor biosynthesis global
fig|6666666.214148.peg.1683	MM4TEC2__C2_L=1925355=	1801418+2672					K01537	Ca2+-transporting ATPase	EC:3.6.3.8	COG0474	P	P-type atpase	Mg(2+)_0	Virulence	Mg(2+) transport ATPase, P-type (EC 3.6.3.2)				EC 3.6.3.3;EC 3.6.3.5;EC 3.6.3.4	Lead, cadmium, zinc and mercury transporting ATPase ; Copper-translocating P-type ATPase	Copper Transport System;Copper homeostasis	3.A.3	P-ATPase
fig|6666666.214148.peg.1684	MM4TEC2__C2_L=1925355=	1804167+716								COG4816	E	Utilization Protein								Propanediol utilization polyhedral body protein PduB	- none -
fig|6666666.214148.peg.1685	MM4TEC2__C2_L=1925355=	1804908+1964																			- none -
fig|6666666.214148.peg.1686	MM4TEC2__C2_L=1925355=	1806968+1001					K02529	LacI family transcriptional regulator		ENOG410XTAD	K	Transcriptional regulator								Transcriptional regulator, LacI family	- none -
fig|6666666.214148.peg.1687	MM4TEC2__C2_L=1925355=	1808033+1514					K00854	xylulokinase	EC:2.7.1.17	COG1070	G	Carbohydrate kinase	L-xylulose3-keto-L-gulonate_0	Virulence	L-xylulose3-keto-L-gulonate kinase (EC 2.7.1.-)				EC 2.7.1.17	Xylulose kinase	Xylose utilization			MF0055,MF0076,MF0078,	xylose degradation;arabitol degradation;xylitol degradation;
fig|6666666.214148.peg.1688	MM4TEC2__C2_L=1925355=	1809541+1457								COG2407	G	Converts the aldose L-fucose into the corresponding ketose L-fuculose (By similarity)								predicted xylose isomerase	Xylose utilization
fig|6666666.214148.peg.1689	MM4TEC2__C2_L=1925355=	1811030+758					K07074	uncharacterized protein		COG3541	S	nucleotidyltransferase								Uncharacterized protein YcgL	- none -
fig|6666666.214148.peg.169	MM4TEC2__C2_L=1925355=	132874-113																			- none -
fig|6666666.214148.peg.1690	MM4TEC2__C2_L=1925355=	1812537-719																			- none -
fig|6666666.214148.peg.1691	MM4TEC2__C2_L=1925355=	1814796-2102			PlantCW	GH78	K05989	alpha-L-rhamnosidase	EC:3.2.1.40	ENOG410XRPP	S	Bacterial alpha-L-rhamnosidase									- none -
fig|6666666.214148.peg.1692	MM4TEC2__C2_L=1925355=	1815876-1061			PlantCW	GH43				ENOG410XS3S	G	hydrolase family 43									- none -
fig|6666666.214148.peg.1693	MM4TEC2__C2_L=1925355=	1816110+1916																			- none -
fig|6666666.214148.peg.1694	MM4TEC2__C2_L=1925355=	1818035+1772								ENOG41108VZ	S	NA									- none -
fig|6666666.214148.peg.1695	MM4TEC2__C2_L=1925355=	1819821+1712																			- none -
fig|6666666.214148.peg.1696	MM4TEC2__C2_L=1925355=	1821609+1040					K02529	LacI family transcriptional regulator		COG1609	K	Transcriptional regulator									- none -
fig|6666666.214148.peg.1697	MM4TEC2__C2_L=1925355=	1822642+2165																			- none -
fig|6666666.214148.peg.1698	MM4TEC2__C2_L=1925355=	1824794+503																			- none -
fig|6666666.214148.peg.1699	MM4TEC2__C2_L=1925355=	1825314+938					K10118	raffinose/stachyose/melibiose transport system permease protein		COG2319	S	wd repeat	N-acetyl-D-glucosamine_0	Virulence	N-acetyl-D-glucosamine ABC transporter, permease protein 2						- none -	3.A.1	ABC			M00196,	Raffinose/stachyose/melibiose transport system;	Structural complex;	Environmental information processing;	Saccharide, polyol, and lipid transport system;
fig|6666666.214148.peg.17	MM4TEC2__C1_L=46754=	13039+140																			- none -
fig|6666666.214148.peg.170	MM4TEC2__C2_L=1925355=	133633-725					K03091	RNA polymerase sporulation-specific sigma factor		COG1191	K	Sigma factors are initiation factors that promote the attachment of RNA polymerase to specific initiation sites and are then released (By similarity)	RNA_0	No evidence of virulence|Intracellular survival and replication	RNA polymerase sigma factor SigB					RNA polymerase sporulation specific sigma factor SigF	Transcription initiation, bacterial sigma factors
fig|6666666.214148.peg.1700	MM4TEC2__C2_L=1925355=	1826252+833				GH42	K02026	multiple sugar transport system permease protein		COG0395	G	Binding-protein-dependent transport systems inner membrane component	Maltodextrin_0	Virulence	Maltodextrin ABC transporter, permease protein MdxG						- none -	3.A.1	ABC
fig|6666666.214148.peg.1701	MM4TEC2__C2_L=1925355=	1827101+1565					K10117	raffinose/stachyose/melibiose transport system substrate-binding protein		ENOG410ZX9Y	G	solute-binding protein									- none -					M00196,	Raffinose/stachyose/melibiose transport system;	Structural complex;	Environmental information processing;	Saccharide, polyol, and lipid transport system;
fig|6666666.214148.peg.1702	MM4TEC2__C2_L=1925355=	1828705+152																			- none -
fig|6666666.214148.peg.1703	MM4TEC2__C2_L=1925355=	1829259+905																			- none -
fig|6666666.214148.peg.1704	MM4TEC2__C2_L=1925355=	1830580+161																			- none -
fig|6666666.214148.peg.1705	MM4TEC2__C2_L=1925355=	1830979-182																			- none -
fig|6666666.214148.peg.1706	MM4TEC2__C2_L=1925355=	1831098+1526								COG1961	L	Resolvase									- none -
fig|6666666.214148.peg.1707	MM4TEC2__C2_L=1925355=	1833206+2648					K01537	Ca2+-transporting ATPase	EC:3.6.3.8	COG0474	P	P-type atpase	Mg(2+)_0	Virulence	Mg(2+) transport ATPase, P-type (EC 3.6.3.2)						- none -	3.A.3	P-ATPase
fig|6666666.214148.peg.1708	MM4TEC2__C2_L=1925355=	1836721-830					K05593	aminoglycoside 6-adenylyltransferase [EC:2.7.7.-]		ENOG410ZXNM	S	Streptomycin adenylyltransferase									- none -
fig|6666666.214148.peg.1709	MM4TEC2__C2_L=1925355=	1837185-449					K02939	large subunit ribosomal protein L9		COG0359	J	Binds to the 23S rRNA (By similarity)								LSU ribosomal protein L9p	Ribosome LSU bacterial					M00178,	Ribosome, bacteria;	Structural complex;	Genetic information processing;	Ribosome;
fig|6666666.214148.peg.171	MM4TEC2__C2_L=1925355=	134075-452					K06379	stage II sporulation protein AB (anti-sigma F factor)	EC:2.7.11.1	COG2172	T	anti-sigma regulatory factor serine threonine protein kinase							EC 2.7.11.1	Anti-sigma F factor	- none -
fig|6666666.214148.peg.1710	MM4TEC2__C2_L=1925355=	1837302+155																			- none -
fig|6666666.214148.peg.1711	MM4TEC2__C2_L=1925355=	1838001-497					K03426	NAD+ diphosphatase	EC:3.6.1.22	COG2816	L	NADH pyrophosphatase									- none -
fig|6666666.214148.peg.1712	MM4TEC2__C2_L=1925355=	1838015+134																			- none -
fig|6666666.214148.peg.1713	MM4TEC2__C2_L=1925355=	1841690-3521				GT2	K03737	pyruvate-ferredoxin/flavodoxin oxidoreductase [EC:1.2.7.1 1.2.7.-]		COG1013	C	Oxidoreductase required for the transfer of electrons from pyruvate to flavodoxin (By similarity)								Pyruvate-flavodoxin oxidoreductase (EC 1.2.7.-)	Methionine Degradation;Pyruvate:ferredoxin oxidoreductase					M00173,M00307,	Reductive citrate cycle (Arnon-Buchanan cycle);Pyruvate oxidation, pyruvate => acetyl-CoA;	Pathway module;	Energy metabolism;	Carbon fixation Signature;
fig|6666666.214148.peg.1714	MM4TEC2__C2_L=1925355=	1841915+836				GT2	K16786	energy-coupling factor transport system ATP-binding protein [EC:3.6.3.-]		COG1122	P	ATPase activity	Glycine_0	Intracellular survival and replication	Glycine betaine ABC transport system, ATP-binding protein OpuAA (EC 3.6.3.32)					ATPase component of general energizing module of ECF transporters	ECF class transporters	3.A.1	ABC
fig|6666666.214148.peg.1715	MM4TEC2__C2_L=1925355=	1842727+872				GT2	K16787	energy-coupling factor transport system ATP-binding protein [EC:3.6.3.-]		COG1122	P	ATPase activity	Glycine_0	Intracellular survival and replication	Glycine betaine ABC transport system, ATP-binding protein OpuAA (EC 3.6.3.32)					ATPase component of general energizing module of ECF transporters	ECF class transporters	3.A.1	ABC
fig|6666666.214148.peg.1716	MM4TEC2__C2_L=1925355=	1843593+848					K16785	energy-coupling factor transport system permease protein		COG0619	P	Cobalt transport protein								Transmembrane component of general energizing module of ECF transporters	ECF class transporters	3.A.1	ABC
fig|6666666.214148.peg.1717	MM4TEC2__C2_L=1925355=	1844449+776					K06173	tRNA pseudouridine38-40 synthase	EC:5.4.99.12	COG0101	J	Formation of pseudouridine at positions 38, 39 and 40 in the anticodon stem and loop of transfer RNAs (By similarity)							EC 5.4.99.12	tRNA pseudouridine synthase A	- none -
fig|6666666.214148.peg.1718	MM4TEC2__C2_L=1925355=	1845231+842																			- none -
fig|6666666.214148.peg.1719	MM4TEC2__C2_L=1925355=	1846184+1337					K03650	tRNA modification GTPase [EC:3.6.-.-]		COG0486	S	Exhibits a very high intrinsic GTPase hydrolysis rate. Involved in the addition of a carboxymethylaminomethyl (cmnm) group at the wobble position (U34) of certain tRNAs, forming tRNA- cmnm(5)s(2)U34 (By similarity)								GTPase and tRNA-U34 5-formylation enzyme TrmE	RNA modification and chromosome partitioning cluster
fig|6666666.214148.peg.172	MM4TEC2__C2_L=1925355=	134397-308					K06378	stage II sporulation protein AA (anti-sigma F factor antagonist)		COG1366	T	stage II sporulation protein								anti-sigma F factor antagonist (spoIIAA-2); anti sigma b factor antagonist RsbV	- none -
fig|6666666.214148.peg.1720	MM4TEC2__C2_L=1925355=	1847533+896								COG0583	K	Transcriptional regulator								Transcriptional regulator, LysR family	- none -
fig|6666666.214148.peg.1721	MM4TEC2__C2_L=1925355=	1848432+479																			- none -
fig|6666666.214148.peg.1722	MM4TEC2__C2_L=1925355=	1848904+311																			- none -
fig|6666666.214148.peg.1723	MM4TEC2__C2_L=1925355=	1849853-605								COG1670	J	#NAME?								Acetyltransferase, GNAT family	- none -
fig|6666666.214148.peg.1724	MM4TEC2__C2_L=1925355=	1850620-764					K00215	4-hydroxy-tetrahydrodipicolinate reductase	EC:1.17.1.8	COG0289	E	Catalyzes the conversion of 4-hydroxy- tetrahydrodipicolinate (HTPA) to tetrahydrodipicolinate (By similarity)							EC 1.17.1.8	4-hydroxy-tetrahydrodipicolinate reductase	Lysine Biosynthesis DAP Pathway;Lysine Biosynthesis DAP Pathway, GJO scratch					M00526,M00016,M00527,	Lysine biosynthesis, DAP dehydrogenase pathway, aspartate => lysine;Lysine biosynthesis, succinyl-DAP pathway, aspartate => lysine;Lysine biosynthesis, DAP aminotransferase pathway, aspartate => lysine;	Pathway module;	Nucleotide and amino acid metabolism;	Lysine metabolism;
fig|6666666.214148.peg.1725	MM4TEC2__C2_L=1925355=	1851512-890			AnimalCarb	GH33	K01714	4-hydroxy-tetrahydrodipicolinate synthase	EC:4.3.3.7	COG0329	E	Catalyzes the condensation of (S)-aspartate-beta- semialdehyde (S)-ASA and pyruvate to 4-hydroxy- tetrahydrodipicolinate (HTPA) (By similarity)							EC 4.3.3.7	4-hydroxy-tetrahydrodipicolinate synthase	Lysine Biosynthesis DAP Pathway;Lysine Biosynthesis DAP Pathway, GJO scratch					M00526,M00016,M00527,	Lysine biosynthesis, DAP dehydrogenase pathway, aspartate => lysine;Lysine biosynthesis, succinyl-DAP pathway, aspartate => lysine;Lysine biosynthesis, DAP aminotransferase pathway, aspartate => lysine;	Pathway module;	Nucleotide and amino acid metabolism;	Lysine metabolism;
fig|6666666.214148.peg.1726	MM4TEC2__C2_L=1925355=	1852614-1079					K00133	aspartate-semialdehyde dehydrogenase	EC:1.2.1.11	COG0136	E	Catalyzes the NADPH-dependent formation of L-aspartate- semialdehyde (L-ASA) by the reductive dephosphorylation of L- aspartyl-4-phosphate (By similarity)							EC 1.2.1.11	Aspartate-semialdehyde dehydrogenase	Lysine Biosynthesis DAP Pathway;Lysine Biosynthesis DAP Pathway, GJO scratch; <br>Threonine and Homoserine Biosynthesis
fig|6666666.214148.peg.1727	MM4TEC2__C2_L=1925355=	1852783+215																			- none -
fig|6666666.214148.peg.1728	MM4TEC2__C2_L=1925355=	1853073+1295																			- none -
fig|6666666.214148.peg.1729	MM4TEC2__C2_L=1925355=	1854368+737								COG0500	Q	Methyltransferase									- none -
fig|6666666.214148.peg.173	MM4TEC2__C2_L=1925355=	135320+872																			- none -
fig|6666666.214148.peg.1730	MM4TEC2__C2_L=1925355=	1855108+881				GT96	K04083	molecular chaperone Hsp33		COG1281	O	Redox regulated molecular chaperone. Protects both thermally unfolding and oxidatively damaged proteins from irreversible aggregation. Plays an important role in the bacterial defense system toward oxidative stress (By similarity)								Chaperonin (heat shock protein 33)	Streptococcus pyogenes recombinatorial zone
fig|6666666.214148.peg.1731	MM4TEC2__C2_L=1925355=	1856001+1682																			- none -
fig|6666666.214148.peg.1732	MM4TEC2__C2_L=1925355=	1857670+824								ENOG410YD3J	S	NA									- none -
fig|6666666.214148.peg.1733	MM4TEC2__C2_L=1925355=	1858521+500								ENOG4111THT	S	Protein of unknown function (DUF1643)									- none -
fig|6666666.214148.peg.1734	MM4TEC2__C2_L=1925355=	1859088+191																			- none -
fig|6666666.214148.peg.1735	MM4TEC2__C2_L=1925355=	1859292+296																			- none -
fig|6666666.214148.peg.1736	MM4TEC2__C2_L=1925355=	1859720+2120			PlantCW	GH36	K07407	alpha-galactosidase	EC:3.2.1.22	COG3345	G	alpha-galactosidase							EC 3.2.1.22	Alpha-galactosidase	Galactosylceramide and Sulfatide metabolism;Lactose and Galactose Uptake and Utilization			MF0050,	melibiose degradation;
fig|6666666.214148.peg.1737	MM4TEC2__C2_L=1925355=	1861956+464								ENOG410ZS81	K	DNA-binding helix-turn-helix protein								Transcriptional regulator	- none -
fig|6666666.214148.peg.1738	MM4TEC2__C2_L=1925355=	1862417+218																			- none -
fig|6666666.214148.peg.1739	MM4TEC2__C2_L=1925355=	1863491-821					K00931	glutamate 5-kinase	EC:2.7.2.11	COG0263	E	Catalyzes the transfer of a phosphate group to glutamate to form glutamate 5-phosphate which rapidly cyclizes to 5- oxoproline (By similarity)									- none -					M00015,	Proline biosynthesis, glutamate => proline;	Pathway module;	Nucleotide and amino acid metabolism;	Arginine and proline metabolism;
fig|6666666.214148.peg.174	MM4TEC2__C2_L=1925355=	136441+341																			- none -
fig|6666666.214148.peg.1740	MM4TEC2__C2_L=1925355=	1863590+431																			- none -
fig|6666666.214148.peg.1741	MM4TEC2__C2_L=1925355=	1864593-521								COG0778	C	nitroreductase								Nitroreductase family protein	- none -
fig|6666666.214148.peg.1742	MM4TEC2__C2_L=1925355=	1864968-356								ENOG41129MT	S	NA									- none -
fig|6666666.214148.peg.1743	MM4TEC2__C2_L=1925355=	1866972-1976					K00615	transketolase	EC:2.2.1.1	COG0021	G	Transketolase	Transketolase_0	Virulence	Transketolase (EC 2.2.1.1)				EC 2.2.1.1	Transketolase	Pentose phosphate pathway			MF0079,MF0090,	bifidobacterium shunt;pentose phosphate pathway (non-oxidative branch);
fig|6666666.214148.peg.1744	MM4TEC2__C2_L=1925355=	1868469-1481								COG1109	G	Catalyzes the conversion of glucosamine-6-phosphate to glucosamine-1-phosphate (By similarity)	Phosphomannomutase_0	Virulence	Phosphomannomutase (EC 5.4.2.8) => Colanic acid				EC 5.4.2.8	Phosphomannomutase	Mannose Metabolism
fig|6666666.214148.peg.1745	MM4TEC2__C2_L=1925355=	1868663+893								COG1307	S	degv family								DegV family protein	- none -
fig|6666666.214148.peg.1746	MM4TEC2__C2_L=1925355=	1869653+1430					K01881	prolyl-tRNA synthetase	EC:6.1.1.15	COG0442	J	Catalyzes the attachment of proline to tRNA(Pro) in a two-step reaction proline is first activated by ATP to form Pro- AMP and then transferred to the acceptor end of tRNA(Pro). As ProRS can inadvertently accommodate and process non-cognate amino acids such as alanine and cysteine, to avoid such errors it has two additional distinct editing activities against alanine. One activity is designated a…							EC 6.1.1.15	Prolyl-tRNA synthetase , archaeal/eukaryal type	tRNA aminoacylation, Pro					M00359,M00360,	Aminoacyl-tRNA biosynthesis, eukaryotes;Aminoacyl-tRNA biosynthesis, prokaryotes;	Functional set;	Metabolism;	Aminoacyl tRNA;
fig|6666666.214148.peg.1747	MM4TEC2__C2_L=1925355=	1871195+374					K07979	GntR family transcriptional regulator		COG1725	K	Transcriptional regulator, GntR family								Transcriptional regulator, GntR family	- none -
fig|6666666.214148.peg.1748	MM4TEC2__C2_L=1925355=	1871573+848				GT2	K01990	ABC-2 type transport system ATP-binding protein		COG1131	V	(ABC) transporter	drrA	Virulence	ATP-dependent efflux pump essential for phthiocerol dimycocerosates translocation, ATP-binding protein DrrA-like	PDIM	Cell wall	DrrA		ABC transporter, ATP-binding protein	- none -	3.A.1	ABC			M00254,	ABC-2 type transport system;	Structural complex;	Environmental information processing;	ABC-2 type and other transport systems;
fig|6666666.214148.peg.1749	MM4TEC2__C2_L=1925355=	1872433+611								ENOG411259X	S	NA									- none -
fig|6666666.214148.peg.175	MM4TEC2__C2_L=1925355=	137591-701								COG2323	S	Membrane									- none -
fig|6666666.214148.peg.1750	MM4TEC2__C2_L=1925355=	1873105+329								ENOG410XPB7	C	NA								Ferredoxin	Soluble cytochromes and functionally related electron carriers
fig|6666666.214148.peg.1751	MM4TEC2__C2_L=1925355=	1873443+683					K07816	putative GTP pyrophosphokinase	EC:2.7.6.5	COG2357	S	relA SpoT domain protein							EC 2.7.6.5	GTP pyrophosphokinase	- none -
fig|6666666.214148.peg.1752	MM4TEC2__C2_L=1925355=	1877144-2966				GT4	K02003	putative ABC transport system ATP-binding protein		COG1136	V	(ABC) transporter	AttE_0	Survival inside the host derived vacuole	AttE component of AttEFGH ABC transport system	FbpABC	Iron uptake|ABC transporter	iron(III) ABC transporter, ATP-binding protein			- none -	3.A.1	ABC			M00258,	Putative ABC transport system;	Structural complex;	Environmental information processing;	ABC-2 type and other transport systems;
fig|6666666.214148.peg.1753	MM4TEC2__C2_L=1925355=	1877303+1298				GT2	K01912	phenylacetate-CoA ligase	EC:6.2.1.30	COG1541	Q	Phenylacetate-CoA ligase								Coenzyme A ligase	- none -
fig|6666666.214148.peg.1754	MM4TEC2__C2_L=1925355=	1878631+1718					K00179	indolepyruvate ferredoxin oxidoreductase, alpha subunit	EC:1.2.7.8	COG4231	C	indolepyruvate ferredoxin oxidoreductase							EC 1.2.7.8	Indolepyruvate oxidoreductase subunit IorA	Aromatic amino acid interconversions with aryl acids;Indole-pyruvate oxidoreductase complex
fig|6666666.214148.peg.1755	MM4TEC2__C2_L=1925355=	1880349+551					K00180	indolepyruvate ferredoxin oxidoreductase, beta subunit	EC:1.2.7.8	COG1014	C	oxidoreductase							EC 1.2.7.8	Indolepyruvate oxidoreductase subunit IorB	Aromatic amino acid interconversions with aryl acids;Indole-pyruvate oxidoreductase complex
fig|6666666.214148.peg.1756	MM4TEC2__C2_L=1925355=	1880924+1319					K01912	phenylacetate-CoA ligase	EC:6.2.1.30	COG1541	Q	Phenylacetate-CoA ligase								Coenzyme A ligase	- none -
fig|6666666.214148.peg.1757	MM4TEC2__C2_L=1925355=	1882265+422								COG4747	E	ACT domain protein								Amino acid-binding ACT	Aromatic amino acid interconversions with aryl acids
fig|6666666.214148.peg.1758	MM4TEC2__C2_L=1925355=	1882803+1394								COG0534	V	Mate efflux family protein								Multi antimicrobial extrusion protein (Na(+)/drug antiporter), MATE family of MDR efflux pumps	Multidrug Resistance Efflux Pumps	2.A.66	MOP
fig|6666666.214148.peg.1759	MM4TEC2__C2_L=1925355=	1884341+6533																			- none -
fig|6666666.214148.peg.176	MM4TEC2__C2_L=1925355=	138376-701																			- none -
fig|6666666.214148.peg.1760	MM4TEC2__C2_L=1925355=	1891037+119																			- none -
fig|6666666.214148.peg.1761	MM4TEC2__C2_L=1925355=	1891273+1673					K01649	2-isopropylmalate synthase	EC:2.3.3.13	COG0119	E	Catalyzes the condensation of the acetyl group of acetyl-CoA with 3-methyl-2-oxobutanoate (2-oxoisovalerate) to form 3-carboxy-3-hydroxy-4-methylpentanoate (2-isopropylmalate) (By similarity)							EC 2.3.3.13	2-isopropylmalate synthase	Branched-Chain Amino Acid Biosynthesis;Leucine Biosynthesis					M00432,	Leucine biosynthesis, 2-oxoisovalerate => 2-oxoisocaproate;	Pathway module;	Nucleotide and amino acid metabolism;	Branched-chain amino acid metabolism;
fig|6666666.214148.peg.1762	MM4TEC2__C2_L=1925355=	1893057+1403					K03308	neurotransmitter:Na+ symporter, NSS family		COG0733	P	Transporter									- none -	2.A.22	APC
fig|6666666.214148.peg.1763	MM4TEC2__C2_L=1925355=	1894565+728				GT2	K01990	ABC-2 type transport system ATP-binding protein		COG1131	V	(ABC) transporter								Multidrug ABC transporter, ATP-binding protein	- none -	3.A.1	ABC			M00254,	ABC-2 type transport system;	Structural complex;	Environmental information processing;	ABC-2 type and other transport systems;
fig|6666666.214148.peg.1764	MM4TEC2__C2_L=1925355=	1895287+758																			- none -
fig|6666666.214148.peg.1765	MM4TEC2__C2_L=1925355=	1896119+452								ENOG410XW5M	S	UvrD REP helicase									- none -
fig|6666666.214148.peg.1766	MM4TEC2__C2_L=1925355=	1896568+416					K03574	8-oxo-dGTP diphosphatase	EC:3.6.1.55	COG0494	L	Nudix hydrolase									- none -
fig|6666666.214148.peg.1767	MM4TEC2__C2_L=1925355=	1897060+1340								ENOG4111JE9	S	HTH_XRE									- none -
fig|6666666.214148.peg.1768	MM4TEC2__C2_L=1925355=	1898394+791					K07045	uncharacterized protein		COG2159	S	amidohydrolase 2								amidohydrolase family protein	- none -
fig|6666666.214148.peg.1769	MM4TEC2__C2_L=1925355=	1900147-929								COG2378	K	Transcriptional regulator									- none -
fig|6666666.214148.peg.177	MM4TEC2__C2_L=1925355=	139178-785								COG0327	S	dinuclear metal center protein, YbgI									- none -
fig|6666666.214148.peg.1770	MM4TEC2__C2_L=1925355=	1900255+329																			- none -
fig|6666666.214148.peg.1771	MM4TEC2__C2_L=1925355=	1901408-773								ENOG4111AZ4	K	Transcriptional regulator, ARAC family									- none -
fig|6666666.214148.peg.1772	MM4TEC2__C2_L=1925355=	1901512+1097					K01599	uroporphyrinogen decarboxylase	EC:4.1.1.37	ENOG410YGBQ	H	methyltransferase									- none -					M00121,	Heme biosynthesis, glutamate => protoheme/siroheme;	Pathway module;	Nucleotide and amino acid metabolism;	Cofactor and vitamin biosynthesis;
fig|6666666.214148.peg.1773	MM4TEC2__C2_L=1925355=	1902735+1334					K00262	glutamate dehydrogenase (NADP+)	EC:1.4.1.4	COG0334	E	oxidoreductase activity, acting on the CH-NH2 group of donors, NAD or NADP as acceptor							EC 1.4.1.4	NADP-specific glutamate dehydrogenase	Arginine and Ornithine Degradation;Glutamate dehydrogenases; <br>Glutamine, Glutamate, Aspartate and Asparagine Biosynthesis; <br>Proline Synthesis			MF0103,	nitrate reduction (assimilatory);
fig|6666666.214148.peg.1774	MM4TEC2__C2_L=1925355=	1904135+497								ENOG4111Q8K	S	TIGR04002 family									- none -
fig|6666666.214148.peg.1775	MM4TEC2__C2_L=1925355=	1904629+119																			- none -
fig|6666666.214148.peg.1776	MM4TEC2__C2_L=1925355=	1904780+1361								ENOG410XNMH	T	Histidine kinase	Sensory_0	Virulence	Sensory boxGGDEF family protein					diguanylate cyclase/phosphodiesterase (GGDEF & EAL domains) with PAS/PAC sensor(s)	- none -
fig|6666666.214148.peg.1777	MM4TEC2__C2_L=1925355=	1906271+638								ENOG41103AX	K	Transcriptional regulator, TetR family								Transcriptional regulator, AcrR family	- none -
fig|6666666.214148.peg.1778	MM4TEC2__C2_L=1925355=	1906906+1679				GT4	K06148	ATP-binding cassette, subfamily C, bacterial		COG1132	V	(ABC) transporter	Efflux_0	Virulence	Efflux ABC transporter, permeaseATP-binding protein SCO2464	LOS	Adherence|Endotoxin	lipid A export ATP-binding/permease protein			- none -	3.A.1	ABC
fig|6666666.214148.peg.1779	MM4TEC2__C2_L=1925355=	1908798+224																			- none -
fig|6666666.214148.peg.178	MM4TEC2__C2_L=1925355=	139824-668					K06967	tRNA (adenine22-N1)-methyltransferase	EC:2.1.1.217	COG2384	S	sam-dependent methyltransferase									- none -
fig|6666666.214148.peg.1780	MM4TEC2__C2_L=1925355=	1909223+701				GT4	K02003	putative ABC transport system ATP-binding protein		COG1136	V	(ABC) transporter	AttE_0	Survival inside the host derived vacuole	AttE component of AttEFGH ABC transport system					ABC transporter ATP-binding protein YvcR	- none -	3.A.1	ABC			M00258,	Putative ABC transport system;	Structural complex;	Environmental information processing;	ABC-2 type and other transport systems;
fig|6666666.214148.peg.1781	MM4TEC2__C2_L=1925355=	1909952+2606					K02004	putative ABC transport system permease protein		COG0577	V	ABC transporter (permease)								ABC transporter, permease protein	- none -					M00258,	Putative ABC transport system;	Structural complex;	Environmental information processing;	ABC-2 type and other transport systems;
fig|6666666.214148.peg.1782	MM4TEC2__C2_L=1925355=	1912580+473								ENOG410XUB6	K	Transcriptional regulator, MarR Family									- none -
fig|6666666.214148.peg.1783	MM4TEC2__C2_L=1925355=	1913050+362								COG1321	K	cellular manganese ion homeostasis								Multi antimicrobial extrusion protein (Na(+)/drug antiporter), MATE family of MDR efflux pumps	Multidrug Resistance Efflux Pumps
fig|6666666.214148.peg.1784	MM4TEC2__C2_L=1925355=	1913580+1325								COG0534	V	Mate efflux family protein								Multi antimicrobial extrusion protein (Na(+)/drug antiporter), MATE family of MDR efflux pumps	Multidrug Resistance Efflux Pumps	2.A.66	MOP
fig|6666666.214148.peg.1785	MM4TEC2__C2_L=1925355=	1914970+704					K03091	RNA polymerase sporulation-specific sigma factor		COG1191	K	Sigma factors are initiation factors that promote the attachment of RNA polymerase to specific initiation sites and are then released (By similarity)	rpoS	Virulence	RNA polymerase sigma factor RpoS					RNA polymerase sporulation specific sigma factor SigK	Transcription initiation, bacterial sigma factors
fig|6666666.214148.peg.1786	MM4TEC2__C2_L=1925355=	1915671+149																			- none -
fig|6666666.214148.peg.1787	MM4TEC2__C2_L=1925355=	1915817+461					K03708	transcriptional regulator of stress and heat shock response		COG4463	K	transcriptional regulator, ctsr	ctsR	Stress|Regulation of gene expression	Transcriptional regulator CtsR					Transcriptional regulator CtsR	Proteolysis in bacteria, ATP-dependent
fig|6666666.214148.peg.1788	MM4TEC2__C2_L=1925355=	1916278+497					K19411	protein arginine kinase activator		COG3880	S	Uvrb UvrC protein									- none -
fig|6666666.214148.peg.1789	MM4TEC2__C2_L=1925355=	1916768+1013					K19405	protein arginine kinase	EC:2.7.14.1	COG3869	E	ATP guanido phosphotransferase								Putative ATP:guanido phosphotransferase YacI (EC 2.7.3.-)	Proteolysis in bacteria, ATP-dependent
fig|6666666.214148.peg.179	MM4TEC2__C2_L=1925355=	140881-1055					K03086	RNA polymerase primary sigma factor		COG0568	K	Sigma factors are initiation factors that promote the attachment of RNA polymerase to specific initiation sites and are then released (By similarity)	RNA_0	Regulation of gene expression	RNA polymerase sigma factor RpoD					RNA polymerase sigma factor RpoD	CBSS-349161.4.peg.2417;Transcription initiation, bacterial sigma factors
fig|6666666.214148.peg.1790	MM4TEC2__C2_L=1925355=	1917802+2501					K03696	ATP-dependent Clp protease ATP-binding subunit ClpC		COG0542	O	ATP-dependent CLP protease ATP-binding subunit	ClpB_0	Virulence	ClpB protein	ClpC	Stress protein	endopeptidase Clp ATP-binding chain C		ClpB protein	Protein chaperones;Proteolysis in bacteria, ATP-dependent	3.A.9	3.A.9
fig|6666666.214148.peg.1791	MM4TEC2__C2_L=1925355=	1920326+530					K05808	putative sigma-54 modulation protein		COG1544	J	sigma 54 modulation protein ribosomal protein S30ea								Ribosomal subunit interface protein	Ribosome activity modulation
fig|6666666.214148.peg.1792	MM4TEC2__C2_L=1925355=	1920948+203																			- none -
fig|6666666.214148.peg.1793	MM4TEC2__C2_L=1925355=	1921156+812																			- none -
fig|6666666.214148.peg.1794	MM4TEC2__C2_L=1925355=	1922068+866								COG1307	S	degv family									- none -
fig|6666666.214148.peg.1795	MM4TEC2__C2_L=1925355=	1922987+1214					K03734	thiamine biosynthesis lipoprotein		COG1477	H	(LipO)protein									- none -
fig|6666666.214148.peg.1796	MM4TEC2__C2_L=1925355=	1924198+416																			- none -
fig|6666666.214148.peg.1797	MM4TEC2__C2_L=1925355=	1924611+515					K00805	heptaprenyl diphosphate synthase	EC:2.5.1.30	COG4769	S	heptaprenyl diphosphate synthase component I									- none -
fig|6666666.214148.peg.1798	MM4TEC2__C3_L=295657=	490-488																			- none -
fig|6666666.214148.peg.1799	MM4TEC2__C3_L=295657=	625+398								ENOG410ZW7U	S	domain protein									- none -
fig|6666666.214148.peg.18	MM4TEC2__C1_L=46754=	13691-317																			- none -
fig|6666666.214148.peg.180	MM4TEC2__C2_L=1925355=	142682-1775					K02316	DNA primase [EC:2.7.7.-]		COG0358	L	DNA primase activity								DNA primase (EC 2.7.7.-)	CBSS-349161.4.peg.2417
fig|6666666.214148.peg.1800	MM4TEC2__C3_L=295657=	1132+1277								COG0582	L	Integrase									- none -
fig|6666666.214148.peg.1801	MM4TEC2__C3_L=295657=	3321-695					K05995	dipeptidase E	EC:3.4.13.21	COG3340	E	peptidase'							EC 3.4.11.2	Peptidase E	- none -
fig|6666666.214148.peg.1802	MM4TEC2__C3_L=295657=	3785-464																			- none -
fig|6666666.214148.peg.1803	MM4TEC2__C3_L=295657=	4624-842					K03442	small conductance mechanosensitive channel		COG0668	M	Mechanosensitive ion channel									- none -	1.A.23	1.A.23
fig|6666666.214148.peg.1804	MM4TEC2__C3_L=295657=	5920-1292					K12960	5-methylthioadenosine/S-adenosylhomocysteine deaminase [EC:3.5.4.31 3.5.4.28]		COG0402	F	deaminase							EC 3.5.4.28	S-adenosylhomocysteine deaminase ; Methylthioadenosine deaminase	- none -
fig|6666666.214148.peg.1805	MM4TEC2__C3_L=295657=	6606-629					K00761	uracil phosphoribosyltransferase	EC:2.4.2.9	COG0035	F	Catalyzes the conversion of uracil and 5-phospho-alpha- D-ribose 1-diphosphate (PRPP) to UMP and diphosphate (By similarity)							EC 2.4.2.9	Uracil phosphoribosyltransferase	De Novo Pyrimidine Synthesis;pyrimidine conversions
fig|6666666.214148.peg.1806	MM4TEC2__C3_L=295657=	7090-449					K01808	ribose 5-phosphate isomerase B	EC:5.3.1.6	COG0698	G	Isomerase							EC 5.3.1.6	Ribose 5-phosphate isomerase B	D-ribose utilization;Pentose phosphate pathway			MF0053,MF0079,MF0090,	allose degradation;bifidobacterium shunt;pentose phosphate pathway (non-oxidative branch);	M00007,	Pentose phosphate pathway, non-oxidative phase, fructose 6P => ribose 5P;	Pathway module;	Carbohydrate and lipid metabolism;	Central carbohydrate metabolism;
fig|6666666.214148.peg.1807	MM4TEC2__C3_L=295657=	7532-440					K01104	protein-tyrosine phosphatase	EC:3.1.3.48	COG0394	T	PHOsphatase							EC 3.1.3.48	Low molecular weight protein tyrosine phosphatase	LMPTP YfkJ cluster
fig|6666666.214148.peg.1808	MM4TEC2__C3_L=295657=	8532-992					K07566	L-threonylcarbamoyladenylate synthase	EC:2.7.7.87	COG0009	J	sua5 ycio yrdc ywlc family protein								TsaC protein (YrdC-Sua5 domains) required for threonylcarbamoyladenosine t(6)A37 modification in tRNA	- none -
fig|6666666.214148.peg.1809	MM4TEC2__C3_L=295657=	10092-1556					K02314	replicative DNA helicase	EC:3.6.4.12	COG0305	L	Replicative dna helicase							EC 3.6.4.12	Replicative DNA helicase (DnaB)	- none -
fig|6666666.214148.peg.181	MM4TEC2__C2_L=1925355=	143719-1037					K01129	dGTPase	EC:3.1.5.1	COG0232	F	deoxyguanosinetriphosphate triphosphohydrolase-like protein								dNTP triphosphohydrolase, broad substrate specificity	- none -
fig|6666666.214148.peg.1810	MM4TEC2__C3_L=295657=	10657-545																			- none -
fig|6666666.214148.peg.1811	MM4TEC2__C3_L=295657=	12463-1784					K08602	oligoendopeptidase F [EC:3.4.24.-]		COG1164	E	Oligoendopeptidase f								Oligoendopeptidase F (EC 3.4.24.-)	- none -
fig|6666666.214148.peg.1812	MM4TEC2__C3_L=295657=	13831-1355					K09157	uncharacterized protein		COG2848	S	UPF0210 protein									- none -
fig|6666666.214148.peg.1813	MM4TEC2__C3_L=295657=	14119-269					K07166	ACT domain-containing protein		COG3830	E	UPF0237 protein								ACT domain-containing protein	- none -
fig|6666666.214148.peg.1814	MM4TEC2__C3_L=295657=	14696-575																			- none -
fig|6666666.214148.peg.1815	MM4TEC2__C3_L=295657=	15570-854								COG1307	S	degv family									- none -
fig|6666666.214148.peg.1816	MM4TEC2__C3_L=295657=	16207-617					K03100	signal peptidase I	EC:3.4.21.89	COG0681	U	Signal peptidase i	Signal_0	Virulence	Signal peptidase I (EC 3.4.21.89)				EC 3.4.21.89	Signal peptidase I	Signal peptidase
fig|6666666.214148.peg.1817	MM4TEC2__C3_L=295657=	16386-179																			- none -
fig|6666666.214148.peg.1818	MM4TEC2__C3_L=295657=	18109-1685																			- none -
fig|6666666.214148.peg.1819	MM4TEC2__C3_L=295657=	20794-2669					K03546	exonuclease SbcC		COG0419	L	Involved in DNA double-strand break repair (DSBR). The Rad50 Mre11 complex possesses single-strand endonuclease activity and ATP-dependent double-strand-specific 3'-5' exonuclease activity. Rad50 provides an ATP-dependent control of Mre11 by unwinding and or repositioning DNA ends into the Mre11 active site (By similarity)								Exonuclease SbcC	DNA repair, bacterial;Rad50-Mre11 DNA repair cluster
fig|6666666.214148.peg.182	MM4TEC2__C2_L=1925355=	144546-713				GT51	K00059	3-oxoacyl-[acyl-carrier protein] reductase	EC:1.1.1.100	ENOG410XNW1	S	)-reductase	short-chain_0	Virulence	short-chain type dehydrogenase-reductase				EC 1.1.1.100	3-oxoacyl-[acyl-carrier protein] reductase	Fatty Acid Biosynthesis FASII
fig|6666666.214148.peg.1820	MM4TEC2__C3_L=295657=	21953-1169					K03547	exonuclease SbcD		COG0420	L	Exonuclease	sbcD	Virulence	Exonuclease SbcD					Exonuclease SbcD	DNA repair, bacterial;Rad50-Mre11 DNA repair cluster
fig|6666666.214148.peg.1821	MM4TEC2__C3_L=295657=	22079+1772								COG3935	L	DNA replication protein DnaD							EC 3.5.1.28	N-acetylmuramoyl-L-alanine amidase	Murein Hydrolases;Recycling of Peptidoglycan Amino Acids
fig|6666666.214148.peg.1822	MM4TEC2__C3_L=295657=	24290-404																			- none -
fig|6666666.214148.peg.1823	MM4TEC2__C3_L=295657=	25090-788					K07238	zinc transporter, ZIP family		COG0428	P	zinc transporter								Metal transporter, ZIP family	- none -	2.A.5	2.A.5
fig|6666666.214148.peg.1824	MM4TEC2__C3_L=295657=	25242+656								ENOG4111Y22	S	NA									- none -
fig|6666666.214148.peg.1825	MM4TEC2__C3_L=295657=	25914+2597					K03695	ATP-dependent Clp protease ATP-binding subunit ClpB		COG0542	O	ATP-dependent CLP protease ATP-binding subunit	clpB	Stress	ClpB protein	T6SS-1	Secretion system|Type VI secretion system	ATP-dependent Clp protease, ATP-binding subunit ClpB		ClpB protein	Protein chaperones;Proteolysis in bacteria, ATP-dependent	3.A.9	3.A.9
fig|6666666.214148.peg.1826	MM4TEC2__C3_L=295657=	29407-704					K06178	23S rRNA pseudouridine2605 synthase	EC:5.4.99.22	COG1187	J	pseudouridine synthase activity							EC 5.4.99.22	Ribosomal large subunit pseudouridine synthase B	- none -
fig|6666666.214148.peg.1827	MM4TEC2__C3_L=295657=	30531-1106					K07258	D-alanyl-D-alanine carboxypeptidase (penicillin-binding protein 5/6)	EC:3.4.16.4	COG1686	M	Carboxypeptidase				PbpG	Serum resistance|Cellular stability	D-alanyl-D-alanine endopeptidase	EC 3.4.16.4	D-alanyl-D-alanine carboxypeptidase	CBSS-84588.1.peg.1247;Metallocarboxypeptidases (EC 3.4.17.-); <br>Murein Hydrolases
fig|6666666.214148.peg.1828	MM4TEC2__C3_L=295657=	30868-344								COG3874	S	sporulation protein ytfj									- none -
fig|6666666.214148.peg.1829	MM4TEC2__C3_L=295657=	31439-593																			- none -
fig|6666666.214148.peg.183	MM4TEC2__C2_L=1925355=	145061-518					K03786	3-dehydroquinate dehydratase II	EC:4.2.1.10	COG0703	E	Catalyzes the specific phosphorylation of the 3-hydroxyl group of shikimic acid using ATP as a cosubstrate (By similarity)									- none -					M00022,	Shikimate pathway, phosphoenolpyruvate + erythrose-4P => chorismate;	Pathway module;	Nucleotide and amino acid metabolism;	Aromatic amino acid metabolism;
fig|6666666.214148.peg.1830	MM4TEC2__C3_L=295657=	32733-1217								COG4100	P	aluminum resistance protein								Aluminum resistance protein	- none -
fig|6666666.214148.peg.1831	MM4TEC2__C3_L=295657=	33632-920					K00791	tRNA dimethylallyltransferase	EC:2.5.1.75	COG0324	J	Catalyzes the transfer of a dimethylallyl group onto the adenine at position 37 in tRNAs that read codons beginning with uridine, leading to the formation of N6-(dimethylallyl)adenosine (i(6)A) (By similarity)							EC 2.5.1.75	tRNA dimethylallyltransferase	- none -
fig|6666666.214148.peg.1832	MM4TEC2__C3_L=295657=	35530-1898					K03572	DNA mismatch repair protein MutL		COG0323	L	This protein is involved in the repair of mismatches in DNA. It is required for dam-dependent methyl-directed DNA mismatch repair. May act as a molecular matchmaker , a protein that promotes the formation of a stable complex between two or more DNA-binding proteins in an ATP-dependent manner without itself being part of a final effector complex (By similarity)								DNA mismatch repair protein MutL	DNA repair, bacterial MutL-MutS system
fig|6666666.214148.peg.1833	MM4TEC2__C3_L=295657=	38128-2588					K03555	DNA mismatch repair protein MutS		COG0249	L	that it carries out the mismatch recognition step. This protein has a weak ATPase activity (By similarity)								DNA mismatch repair protein MutS	DNA repair, bacterial MutL-MutS system;DNA repair system including RecA, MutS and a hypothetical protein
fig|6666666.214148.peg.1834	MM4TEC2__C3_L=295657=	39469-1322					K06168	tRNA-2-methylthio-N6-dimethylallyladenosine synthase	EC:2.8.4.3	COG0621	J	Catalyzes the methylthiolation of N6- (dimethylallyl)adenosine (i(6)A), leading to the formation of 2- methylthio-N6-(dimethylallyl)adenosine (ms(2)i(6)A) at position 37 in tRNAs that read codons beginning with uridine (By similarity)							EC 2.8.4.3	tRNA-i(6)A37 methylthiotransferase	- none -
fig|6666666.214148.peg.1835	MM4TEC2__C3_L=295657=	39599+2222				GT51	K12555	penicillin-binding protein 2A [EC:2.4.1.129 2.3.2.-]		COG0744	M	penicillin-binding protein							EC 2.4.1.129	Multimodular transpeptidase-transglycosylase (EC 3.4.-.-)	- none -
fig|6666666.214148.peg.1836	MM4TEC2__C3_L=295657=	42064+605								ENOG4111KA4	V	Type I restriction									- none -
fig|6666666.214148.peg.1837	MM4TEC2__C3_L=295657=	42650+2939					K01153	type I restriction enzyme, R subunit	EC:3.1.21.3	COG0610	V	Type I site-specific deoxyribonuclease							EC 3.1.21.3	Type I restriction-modification system, restriction subunit R	Restriction-Modification System;Type I Restriction-Modification
fig|6666666.214148.peg.1838	MM4TEC2__C3_L=295657=	45594+1604					K03427	type I restriction enzyme M protein	EC:2.1.1.72	COG0286	V	type I restriction-modification system							EC 2.1.1.72	Type I restriction-modification system, DNA-methyltransferase subunit M	Restriction-Modification System;Type I Restriction-Modification
fig|6666666.214148.peg.1839	MM4TEC2__C3_L=295657=	47201+1202					K01154	type I restriction enzyme, S subunit	EC:3.1.21.3	COG0732	V	Restriction modification system DNA (Specificity							EC 3.1.21.3	Type I restriction-modification system, specificity subunit S	Restriction-Modification System;Type I Restriction-Modification
fig|6666666.214148.peg.184	MM4TEC2__C2_L=1925355=	145474-416					K03786	3-dehydroquinate dehydratase II	EC:4.2.1.10	COG0757	E	Catalyzes a trans-dehydration via an enolate intermediate (By similarity)							EC 4.2.1.10	3-dehydroquinate dehydratase II	Chorismate Synthesis;Common Pathway For Synthesis of Aromatic Compounds (DAHP synthase to chorismate); <br>Quinate degradation					M00022,	Shikimate pathway, phosphoenolpyruvate + erythrose-4P => chorismate;	Pathway module;	Nucleotide and amino acid metabolism;	Aromatic amino acid metabolism;
fig|6666666.214148.peg.1840	MM4TEC2__C3_L=295657=	48884-488					K01154	type I restriction enzyme, S subunit	EC:3.1.21.3	ENOG411245M	V	Type I restriction modification DNA specificity domain							EC 3.1.21.3	Type I restriction-modification system, specificity subunit S	Restriction-Modification System;Type I Restriction-Modification
fig|6666666.214148.peg.1841	MM4TEC2__C3_L=295657=	48963+119																			- none -
fig|6666666.214148.peg.1842	MM4TEC2__C3_L=295657=	49711-635								COG0582	L	Integrase								Integrase	- none -
fig|6666666.214148.peg.1843	MM4TEC2__C3_L=295657=	50481+641					K01154	type I restriction enzyme, S subunit	EC:3.1.21.3	COG0732	V	Restriction modification system DNA (Specificity							EC 3.1.21.3	Type I restriction-modification system, specificity subunit S	Restriction-Modification System;Type I Restriction-Modification
fig|6666666.214148.peg.1844	MM4TEC2__C3_L=295657=	51101+932								COG0582	L	Integrase								Integrase	- none -
fig|6666666.214148.peg.1845	MM4TEC2__C3_L=295657=	52845+362																			- none -
fig|6666666.214148.peg.1846	MM4TEC2__C3_L=295657=	53222+230																			- none -
fig|6666666.214148.peg.1847	MM4TEC2__C3_L=295657=	53699+1613								COG1961	L	Resolvase								Site-specific recombinase	- none -
fig|6666666.214148.peg.1848	MM4TEC2__C3_L=295657=	55960-557								COG1853	S	flavin reductase domain protein, FMN-binding								Flavoredoxin	- none -
fig|6666666.214148.peg.1849	MM4TEC2__C3_L=295657=	56651-644					K07043	uncharacterized protein		COG1451	S	metaL-dependent hydrolase								Putative predicted metal-dependent hydrolase	Restriction-Modification System
fig|6666666.214148.peg.185	MM4TEC2__C2_L=1925355=	146271-800					K00014	shikimate dehydrogenase	EC:1.1.1.25	COG0169	E	shikimate dehydrogenase									- none -					M00022,	Shikimate pathway, phosphoenolpyruvate + erythrose-4P => chorismate;	Pathway module;	Nucleotide and amino acid metabolism;	Aromatic amino acid metabolism;
fig|6666666.214148.peg.1850	MM4TEC2__C3_L=295657=	57378-734								COG3884	I	acyl-ACP thioesterase									- none -
fig|6666666.214148.peg.1851	MM4TEC2__C3_L=295657=	57571+1685					K10947	PadR family transcriptional regulator, regulatory protein PadR		COG1695	K	Transcriptional regulator									- none -
fig|6666666.214148.peg.1852	MM4TEC2__C3_L=295657=	60048-764					K06442	23S rRNA (cytidine1920-2'-O)/16S rRNA (cytidine1409-2'-O)-methyltransferase [EC:2.1.1.226 2.1.1.227]		COG1189	J	hemolysin a				Hemolysin	Toxin|Membrane-damaging|Pore-forming|RTX toxin	hemolysin A		RNA binding methyltransferase FtsJ like	- none -	1.C.109	1.C.109
fig|6666666.214148.peg.1853	MM4TEC2__C3_L=295657=	60932-887					K13789	geranylgeranyl diphosphate synthase, type II [EC:2.5.1.1 2.5.1.10 2.5.1.29]		COG0142	H	synthase							EC 2.5.1.10	(2E,6E)-farnesyl diphosphate synthase	Isoprenoid Biosynthesis: Interconversions;Isoprenoinds for Quinones; <br>Polyprenyl Diphosphate Biosynthesis					M00364,	C10-C20 isoprenoid biosynthesis, bacteria;	Pathway module;	Carbohydrate and lipid metabolism;	Terpenoid backbone biosynthesis;
fig|6666666.214148.peg.1854	MM4TEC2__C3_L=295657=	61777-842					K01491	methylenetetrahydrofolate dehydrogenase (NADP+) / methenyltetrahydrofolate cyclohydrolase [EC:1.5.1.5 3.5.4.9]		COG0190	H	Catalyzes the oxidation of 5,10- methylenetetrahydrofolate to 5,10-methenyltetrahydrofolate and then the hydrolysis of 5,10-methenyltetrahydrofolate to 10- formyltetrahydrofolate (By similarity)							EC 1.5.1.5;EC 3.5.4.9	Methylenetetrahydrofolate dehydrogenase (NADP+) / Methenyltetrahydrofolate cyclohydrolase	5-FCL-like protein;One-carbon metabolism by tetrahydropterines; <br>One-carbon metabolism by tetrahydropterines			MF0093,	homoacetogenesis;	M00140,	C1-unit interconversion, prokaryotes;	Pathway module;	Nucleotide and amino acid metabolism;	Cofactor and vitamin biosynthesis;
fig|6666666.214148.peg.1855	MM4TEC2__C3_L=295657=	62185-404					K03625	N utilization substance protein B		COG0781	K	DNA-dependent transcription, termination									- none -
fig|6666666.214148.peg.1856	MM4TEC2__C3_L=295657=	62595-338								COG1302	S	alkaline shock protein									- none -
fig|6666666.214148.peg.1857	MM4TEC2__C3_L=295657=	63151-485					K06397	stage III sporulation protein AH		ENOG4111WBG	S	stage III sporulation protein AH									- none -
fig|6666666.214148.peg.1858	MM4TEC2__C3_L=295657=	63671-500					K06396	stage III sporulation protein AG												Stage III sporulation protein AG	- none -
fig|6666666.214148.peg.1859	MM4TEC2__C3_L=295657=	64146-512																			- none -
fig|6666666.214148.peg.186	MM4TEC2__C2_L=1925355=	147536-1253					K00800	3-phosphoshikimate 1-carboxyvinyltransferase	EC:2.5.1.19	COG0128	E	5-enolpyruvylshikimate-3-phosphate synthase	aroA3	Cellular metabolism	3-phosphoshikimate 1-carboxyvinyltransferase (EC 2.5.1.19)				EC 2.5.1.19	5-Enolpyruvylshikimate-3-phosphate synthase	Chorismate Synthesis;Common Pathway For Synthesis of Aromatic Compounds (DAHP synthase to chorismate)					M00022,	Shikimate pathway, phosphoenolpyruvate + erythrose-4P => chorismate;	Pathway module;	Nucleotide and amino acid metabolism;	Aromatic amino acid metabolism;
fig|6666666.214148.peg.1860	MM4TEC2__C3_L=295657=	65353-1196					K06394	stage III sporulation protein AE		ENOG410XRMF	S	stage III sporulation protein ae									- none -	9.B.70	9.B.70
fig|6666666.214148.peg.1861	MM4TEC2__C3_L=295657=	65742-392					K06393	stage III sporulation protein AD		ENOG4111UC5	S	Stage iii sporulation protein ad									- none -	9.B.70	9.B.70
fig|6666666.214148.peg.1862	MM4TEC2__C3_L=295657=	65943-197					K06392	stage III sporulation protein AC		ENOG41121JY	S	Stage III sporulation protein AC									- none -
fig|6666666.214148.peg.1863	MM4TEC2__C3_L=295657=	66423-470																			- none -
fig|6666666.214148.peg.1864	MM4TEC2__C3_L=295657=	67327-902					K06390	stage III sporulation protein AA		COG3854	S	stage iii sporulation protein aa								Stage III sporulation protein AA	- none -	9.B.70	9.B.70
fig|6666666.214148.peg.1865	MM4TEC2__C3_L=295657=	69049-1613					K18682	ribonucrease Y [EC:3.1.-.-]		COG1418	S	Endoribonuclease that initiates mRNA decay (By similarity)								FIG002344: Hydrolase (HAD superfamily)	CBSS-469378.4.peg.430
fig|6666666.214148.peg.1866	MM4TEC2__C3_L=295657=	71146-1907					K01950	NAD+ synthase (glutamine-hydrolysing)	EC:6.3.5.1	COG0388	S	nitrilase cyanide hydratase and apolipoprotein n-acyltransferase							EC 6.3.1.5	NAD synthetase / Glutamine amidotransferase chain of NAD synthetase	NAD and NADP cofactor biosynthesis global;NAD and NADP cofactor biosynthesis global					M00115,	NAD biosynthesis, aspartate => NAD;	Pathway module;	Nucleotide and amino acid metabolism;	Cofactor and vitamin biosynthesis;
fig|6666666.214148.peg.1867	MM4TEC2__C3_L=295657=	72187-1034					K03553	recombination protein RecA		COG0468	L	Can catalyze the hydrolysis of ATP in the presence of single-stranded DNA, the ATP-dependent uptake of single-stranded DNA by duplex DNA, and the ATP-dependent hybridization of homologous single-stranded DNAs. It interacts with LexA causing its activation and leading to its autocatalytic cleavage (By similarity)								RecA protein	CBSS-469378.4.peg.430;DNA repair, bacterial; <br>DNA repair system including RecA, MutS and a hypothetical protein					M00729,	Fluoroquinolone resistance, gyrase-protecting protein Qnr;	Functional set;	Environmental information processing;	Drug resistance;
fig|6666666.214148.peg.1868	MM4TEC2__C3_L=295657=	73285-1079					K03742	nicotinamide-nucleotide amidase	EC:3.5.1.42	COG1546	S	competence damage-inducible protein									- none -
fig|6666666.214148.peg.1869	MM4TEC2__C3_L=295657=	73878-596					K00995	CDP-diacylglycerol--glycerol-3-phosphate 3-phosphatidyltransferase	EC:2.7.8.5	COG0558	I	cdp-diacylglycerol-glycerol-3-phosphate 3-phosphatidyltransferase							EC 2.7.8.5	CDP-diacylglycerol--glycerol-3-phosphate 3-phosphatidyltransferase	Glycerolipid and Glycerophospholipid Metabolism in Bacteria	4.F.1	4.F.1
fig|6666666.214148.peg.187	MM4TEC2__C2_L=1925355=	148585-1052					K01735	3-dehydroquinate synthase	EC:4.2.3.4	COG0337	E	3-dehydroquinate synthase	aroB	Cellular metabolism|Virulence|Intracellular survival and replication	3-dehydroquinate synthase (EC 4.2.3.4)				EC 4.2.3.4	3-dehydroquinate synthase	Chorismate Synthesis;Common Pathway For Synthesis of Aromatic Compounds (DAHP synthase to chorismate)					M00022,	Shikimate pathway, phosphoenolpyruvate + erythrose-4P => chorismate;	Pathway module;	Nucleotide and amino acid metabolism;	Aromatic amino acid metabolism;
fig|6666666.214148.peg.1870	MM4TEC2__C3_L=295657=	75197-1322					K14441	ribosomal protein S12 methylthiotransferase	EC:2.8.4.4	COG0621	J	Catalyzes the methylthiolation of N6- (dimethylallyl)adenosine (i(6)A), leading to the formation of 2- methylthio-N6-(dimethylallyl)adenosine (ms(2)i(6)A) at position 37 in tRNAs that read codons beginning with uridine (By similarity)							EC 2.8.4.4	Ribosomal protein S12p Asp88 (E. coli) methylthiotransferase	- none -
fig|6666666.214148.peg.1871	MM4TEC2__C3_L=295657=	78522-3323					K03466	DNA segregation ATPase FtsK/SpoIIIE, S-DNA-T family		COG1674	D	cell division protein FtsK								DNA translocase FtsK	- none -	3.A.12	3.A.12
fig|6666666.214148.peg.1872	MM4TEC2__C3_L=295657=	78671-152																			- none -
fig|6666666.214148.peg.1873	MM4TEC2__C3_L=295657=	79723-1004					K00053	ketol-acid reductoisomerase	EC:1.1.1.86	COG0059	E	Alpha-keto-beta-hydroxylacyl reductoisomerase							EC 1.1.1.86	Ketol-acid reductoisomerase	Branched-Chain Amino Acid Biosynthesis;Coenzyme A Biosynthesis					M00570,M00019,	Isoleucine biosynthesis, threonine => 2-oxobutanoate => isoleucine;Valine/isoleucine biosynthesis, pyruvate => valine / 2-oxobutanoate => isoleucine;	Pathway module;	Nucleotide and amino acid metabolism;	Branched-chain amino acid metabolism;
fig|6666666.214148.peg.1874	MM4TEC2__C3_L=295657=	79909+1202					K06923	uncharacterized protein		COG2607	S	ATPase (AAA									- none -
fig|6666666.214148.peg.1875	MM4TEC2__C3_L=295657=	82488-1346				GT28	K01924	UDP-N-acetylmuramate--alanine ligase	EC:6.3.2.8	COG0773	M	cell wall formation (By similarity)							EC 6.3.2.8	UDP-N-acetylmuramate--alanine ligase	Peptidoglycan biosynthesis--gjo
fig|6666666.214148.peg.1876	MM4TEC2__C3_L=295657=	82645+269					K06412	stage V sporulation protein G		COG2088	M	Could be involved in septation (By similarity)								Protein of unknown function identified by role in sporulation (SpoVG)	Sporulation-associated proteins with broader functions
fig|6666666.214148.peg.1877	MM4TEC2__C3_L=295657=	84479-1460					K03531	cell division protein FtsZ		COG0206	D	Essential cell division protein that forms a contractile ring structure (Z ring) at the future cell division site. The regulation of the ring assembly controls the timing and the location of cell division. One of the functions of the FtsZ ring is to recruit other cell division proteins to the septum to produce a new cell wall between the dividing cells. Binds GTP and shows GTPase activity (By sim…								Cell division protein FtsZ (EC 3.4.24.-)	Bacterial Cytoskeleton
fig|6666666.214148.peg.1878	MM4TEC2__C3_L=295657=	85654-1166								COG0849	D	This protein may be involved in anomalous filament growth. May be a component of the septum (By similarity)									- none -
fig|6666666.214148.peg.1879	MM4TEC2__C3_L=295657=	86591-797																			- none -
fig|6666666.214148.peg.188	MM4TEC2__C2_L=1925355=	149727-1130					K01736	chorismate synthase	EC:4.2.3.5	COG0082	E	5-enolpyruvylshikimate-3-phosphate phospholyase	Chorismate_0	Virulence	Chorismate synthase (EC 4.2.3.5)				EC 4.2.3.5	Chorismate synthase	Chorismate Synthesis;Common Pathway For Synthesis of Aromatic Compounds (DAHP synthase to chorismate)					M00022,	Shikimate pathway, phosphoenolpyruvate + erythrose-4P => chorismate;	Pathway module;	Nucleotide and amino acid metabolism;	Aromatic amino acid metabolism;
fig|6666666.214148.peg.1880	MM4TEC2__C3_L=295657=	87875-1256					K00790	UDP-N-acetylglucosamine 1-carboxyvinyltransferase	EC:2.5.1.7	COG0766	M	Cell wall formation. Adds enolpyruvyl to UDP-N- acetylglucosamine (By similarity)							EC 2.5.1.7	UDP-N-acetylglucosamine 1-carboxyvinyltransferase	UDP-N-acetylmuramate from Fructose-6-phosphate Biosynthesis
fig|6666666.214148.peg.1881	MM4TEC2__C3_L=295657=	89155-1106				GT28	K03588	cell division protein FtsW		COG0772	D	Cell Division Protein								Cell division protein FtsW	Bacterial Cytoskeleton	2.A.103	CDF
fig|6666666.214148.peg.1882	MM4TEC2__C3_L=295657=	90566-1403				GT28	K01925	UDP-N-acetylmuramoylalanine--D-glutamate ligase	EC:6.3.2.9	COG0771	M	Cell wall formation. Catalyzes the addition of glutamate to the nucleotide precursor UDP-N-acetylmuramoyl-L-alanine (UMA) (By similarity)							EC 6.3.2.9	UDP-N-acetylmuramoylalanine--D-glutamate ligase	Peptidoglycan biosynthesis--gjo
fig|6666666.214148.peg.1883	MM4TEC2__C3_L=295657=	91537-947				GT2	K01000	phospho-N-acetylmuramoyl-pentapeptide-transferase	EC:2.7.8.13	COG0472	M	phospho-N-acetylmuramoyl-pentapeptide-transferase activity							EC 2.7.8.13	Phospho-N-acetylmuramoyl-pentapeptide-transferase	- none -	9.B.146	9.B.146
fig|6666666.214148.peg.1884	MM4TEC2__C3_L=295657=	92996-1469					K01928	UDP-N-acetylmuramoyl-L-alanyl-D-glutamate--2,6-diaminopimelate ligase	EC:6.3.2.13	COG0769	M	Catalyzes the addition of meso-diaminopimelic acid to the nucleotide precursor UDP-N-acetylmuramoyl-L-alanyl-D-glutamate (UMAG) in the biosynthesis of bacterial cell-wall peptidoglycan (By similarity)							EC 6.3.2.13	UDP-N-acetylmuramoylalanyl-D-glutamate--2,6-diaminopimelate ligase	Peptidoglycan biosynthesis--gjo
fig|6666666.214148.peg.1885	MM4TEC2__C3_L=295657=	94697-1688				GT51	K08384	stage V sporulation protein D (sporulation-specific penicillin-binding protein)		COG0768	M	penicillin-binding protein	pbpB	Intracellular survival and replication	Cell division protein FtsI [Peptidoglycan synthetase] (EC 2.4.1.129) Penicillin-binding protein 2B				EC 2.4.1.129	Cell division protein FtsI [Peptidoglycan synthetase]	Bacterial Cytoskeleton;CBSS-83331.1.peg.3039
fig|6666666.214148.peg.1886	MM4TEC2__C3_L=295657=	95605-770																			- none -
fig|6666666.214148.peg.1887	MM4TEC2__C3_L=295657=	96570-938					K03438	16S rRNA (cytosine1402-N4)-methyltransferase	EC:2.1.1.199	COG0275	M	Specifically methylates the N4 position of cytidine in position 1402 (C1402) of 16S rRNA (By similarity)								16S rRNA (cytosine(1402)-N(4))-methyltransferase EC 2.1.1.199)	- none -
fig|6666666.214148.peg.1888	MM4TEC2__C3_L=295657=	97009-437					K03925	MraZ protein		COG2001	S	Cell division protein mraZ									- none -
fig|6666666.214148.peg.1889	MM4TEC2__C3_L=295657=	97974-812					K01776	glutamate racemase	EC:5.1.1.3	COG0796	M	Provides the (R)-glutamate required for cell wall biosynthesis (By similarity)	murI	Virulence	Glutamate racemase (EC 5.1.1.3)				EC 5.1.1.3	Glutamate racemase	Glutamine, Glutamate, Aspartate and Asparagine Biosynthesis
fig|6666666.214148.peg.189	MM4TEC2__C2_L=1925355=	150852-1124								COG2333	S	DNA internalization-related competence protein ComEC Rec2								Late competence protein ComEC, DNA transport	- none -	3.A.11	3.A.11
fig|6666666.214148.peg.1890	MM4TEC2__C3_L=295657=	98125+272					K02968	small subunit ribosomal protein S20		COG0268	J	Binds directly to 16S ribosomal RNA (By similarity)								SSU ribosomal protein S20p	- none -					M00178,	Ribosome, bacteria;	Structural complex;	Genetic information processing;	Ribosome;
fig|6666666.214148.peg.1891	MM4TEC2__C3_L=295657=	98552+1517				GT4	K11072	spermidine/putrescine transport system ATP-binding protein	EC:3.6.3.31	COG3842	E	Part of the ABC transporter complex PotABCD involved in spermidine putrescine import. Responsible for energy coupling to the transport system (By similarity)	Maltodextrin_0	Virulence	Maltodextrin ABC transporter, ATP-binding protein MsmX					Spermidine/putrescine import ABC transporter ATP-binding protein PotA (TC 3.A.1.11.1)	- none -	3.A.1	ABC			M00299,	Spermidine/putrescine transport system;	Structural complex;	Environmental information processing;	Mineral and organic ion transport system;
fig|6666666.214148.peg.1892	MM4TEC2__C3_L=295657=	100066+806					K11071	spermidine/putrescine transport system permease protein		COG1176	P	transporter activity								Spermidine/putrescine import ABC transporter permease protein PotB (TC 3.A.1.11.1)	- none -	3.A.1	ABC			M00299,	Spermidine/putrescine transport system;	Structural complex;	Environmental information processing;	Mineral and organic ion transport system;
fig|6666666.214148.peg.1893	MM4TEC2__C3_L=295657=	100866+794					K11070	spermidine/putrescine transport system permease protein		COG1177	P	Binding-protein-dependent transport systems inner membrane component								Spermidine/putrescine import ABC transporter permease protein PotC (TC 3.A.1.11.1)	- none -	3.A.1	ABC			M00299,	Spermidine/putrescine transport system;	Structural complex;	Environmental information processing;	Mineral and organic ion transport system;
fig|6666666.214148.peg.1894	MM4TEC2__C3_L=295657=	101657+1412					K11069	spermidine/putrescine transport system substrate-binding protein		COG0687	E	polyamine binding	Spermidineputrescine_0	Intracellular survival and replication	Spermidineputrescine import ABC transporter substrate-binding protein PotD (TC 3.A.1.11.1)					ABC transporter, periplasmic spermidine putrescine-binding protein PotD (TC 3.A.1.11.1)	Polyamine Metabolism	3.A.1	ABC			M00299,	Spermidine/putrescine transport system;	Structural complex;	Environmental information processing;	Mineral and organic ion transport system;
fig|6666666.214148.peg.1895	MM4TEC2__C3_L=295657=	103105+851					K00384	thioredoxin reductase (NADPH)	EC:1.8.1.9	COG0492	O	thioredoxin reductase							EC 1.8.1.9	Thioredoxin reductase	Thioredoxin-disulfide reductase;pyrimidine conversions
fig|6666666.214148.peg.1896	MM4TEC2__C3_L=295657=	104857-713					K04069	pyruvate formate lyase activating enzyme	EC:1.97.1.4	COG1180	O	activating enzyme	Pyruvate_0	Virulence	Pyruvate formate-lyase activating enzyme (EC 1.97.1.4)				EC 1.97.1.4	Pyruvate formate-lyase activating enzyme	Fermentations: Mixed acid
fig|6666666.214148.peg.1897	MM4TEC2__C3_L=295657=	107060-2216					K00656	formate C-acetyltransferase	EC:2.3.1.54	COG1882	C	formate acetyltransferase	Pyruvate_0	Virulence	Pyruvate formate-lyase (EC 2.3.1.54)				EC 2.3.1.54	Pyruvate formate-lyase	Fermentations: Mixed acid			MF0001,MF0030,MF0085,	ethanol production (formate pathway);threonine degradation (formate pathway);pyruvate:formate lyase;
fig|6666666.214148.peg.1898	MM4TEC2__C3_L=295657=	108325-980					K03340	diaminopimelate dehydrogenase	EC:1.4.1.16	ENOG410XPX2	E	Diaminopimelate dehydrogenase							EC 1.4.1.16	Meso-diaminopimelate D-dehydrogenase	Lysine Biosynthesis DAP Pathway;Lysine Biosynthesis DAP Pathway, GJO scratch					M00526,	Lysine biosynthesis, DAP dehydrogenase pathway, aspartate => lysine;	Pathway module;	Nucleotide and amino acid metabolism;	Lysine metabolism;
fig|6666666.214148.peg.1899	MM4TEC2__C3_L=295657=	108981-536					K07095	uncharacterized protein		COG0622	S	Phosphodiesterase, mj0936 family									- none -
fig|6666666.214148.peg.19	MM4TEC2__C1_L=46754=	13783+188																			- none -
fig|6666666.214148.peg.190	MM4TEC2__C2_L=1925355=	151632-776					K07001	NTE family protein		COG1752	S	K07001 NTE family protein									- none -
fig|6666666.214148.peg.1900	MM4TEC2__C3_L=295657=	110019-1025			PlantCW	GH43	K01785	aldose 1-epimerase	EC:5.1.3.3	COG2017	G	converts alpha-aldose to the beta-anomer. It is active on D-glucose, L-arabinose, D-xylose, D-galactose, maltose and lactose (By similarity)							EC 5.1.3.3	Aldose 1-epimerase	Lactose and Galactose Uptake and Utilization;Maltose and Maltodextrin Utilization			MF0056,	galactose degradation (Leloir pathway);	M00632,	Galactose degradation, Leloir pathway, galactose => alpha-D-glucose-1P;	Pathway module;	Carbohydrate and lipid metabolism;	Other carbohydrate metabolism;
fig|6666666.214148.peg.1901	MM4TEC2__C3_L=295657=	111501-1385					K06001	tryptophan synthase beta chain	EC:4.2.1.20	COG1350	E	The beta subunit is responsible for the synthesis of L- tryptophan from indole and L-serine (By similarity)	Tryptophan_0	Virulence	Tryptophan synthase beta chain (EC 4.2.1.20)				EC 4.2.1.122	Tryptophan synthase (indole-salvaging)	- none -
fig|6666666.214148.peg.1902	MM4TEC2__C3_L=295657=	111961+683				CE4				COG0726	G	4-amino-4-deoxy-alpha-L-arabinopyranosyl undecaprenyl phosphate biosynthetic process	Peptidoglycan_0	Escape from the phagosome|Defense against host immune response	Peptidoglycan N-acetylglucosamine deacetylase (EC 3.5.1.-)	PgdA	Immune evasion	Peptidoglycan N-deacetylase		Peptidoglycan N-acetylglucosamine deacetylase (EC 3.5.1.-)	Polysaccharide deacetylases
fig|6666666.214148.peg.1903	MM4TEC2__C3_L=295657=	113591-914					K17828	dihydroorotate dehydrogenase (NAD+) catalytic subunit	EC:1.3.1.14	COG0167	F	Catalyzes the conversion of dihydroorotate to orotate	NAD-dependent_0	Virulence	NAD-dependent dihydropyrimidine dehydrogenase subunit PreA (EC 1.3.1.1)				EC 1.3.1.14	Dihydroorotate dehydrogenase (NAD(+)), catalytic subunit	- none -					M00051,	Uridine monophosphate biosynthesis, glutamine (+ PRPP) => UMP;	Pathway module;	Nucleotide and amino acid metabolism;	Pyrimidine metabolism;
fig|6666666.214148.peg.1904	MM4TEC2__C3_L=295657=	114364-773					K02823	dihydroorotate dehydrogenase electron transfer subunit		COG0543	C	cytochrome-b5 reductase activity, acting on NAD(P)H							EC 1.3.1.14	Dihydroorotate dehydrogenase (NAD(+)), electron transfer subunit	- none -
fig|6666666.214148.peg.1905	MM4TEC2__C3_L=295657=	115329-905					K01591	orotidine-5'-phosphate decarboxylase	EC:4.1.1.23	COG0284	F	Catalyzes the decarboxylation of orotidine 5'- monophosphate (OMP) to uridine 5'-monophosphate (UMP) (By similarity)							EC 4.1.1.23	Orotidine 5&#39;-phosphate decarboxylase	De Novo Pyrimidine Synthesis					M00051,	Uridine monophosphate biosynthesis, glutamine (+ PRPP) => UMP;	Pathway module;	Nucleotide and amino acid metabolism;	Pyrimidine metabolism;
fig|6666666.214148.peg.1906	MM4TEC2__C3_L=295657=	115997-659				GH47	K00762	orotate phosphoribosyltransferase	EC:2.4.2.10	COG0461	F	orotate phosphoribosyltransferase activity							EC 2.4.2.10	Orotate phosphoribosyltransferase	De Novo Pyrimidine Synthesis					M00051,	Uridine monophosphate biosynthesis, glutamine (+ PRPP) => UMP;	Pathway module;	Nucleotide and amino acid metabolism;	Pyrimidine metabolism;
fig|6666666.214148.peg.1907	MM4TEC2__C3_L=295657=	117279-1271					K01465	dihydroorotase	EC:3.5.2.3	COG0044	F	Dihydroorotase							EC 3.5.2.3	Dihydroorotase	De Novo Pyrimidine Synthesis					M00051,	Uridine monophosphate biosynthesis, glutamine (+ PRPP) => UMP;	Pathway module;	Nucleotide and amino acid metabolism;	Pyrimidine metabolism;
fig|6666666.214148.peg.1908	MM4TEC2__C3_L=295657=	118205-929					K00609	aspartate carbamoyltransferase catalytic subunit	EC:2.1.3.2	COG0540	F	aspartate transcarbamylase							EC 2.1.3.2	Aspartate carbamoyltransferase	De Novo Pyrimidine Synthesis					M00051,	Uridine monophosphate biosynthesis, glutamine (+ PRPP) => UMP;	Pathway module;	Nucleotide and amino acid metabolism;	Pyrimidine metabolism;
fig|6666666.214148.peg.1909	MM4TEC2__C3_L=295657=	118761-542					K02825	pyrimidine operon attenuation protein / uracil phosphoribosyltransferase	EC:2.4.2.9	COG2065	F	Also displays a weak uracil phosphoribosyltransferase activity which is not physiologically significant (By similarity)							EC 2.4.2.9	Uracil phosphoribosyltransferase / Pyrimidine operon regulatory protein PyrR	De Novo Pyrimidine Synthesis;De Novo Pyrimidine Synthesis; <br>pyrimidine conversions
fig|6666666.214148.peg.191	MM4TEC2__C2_L=1925355=	152593-953					K00845	glucokinase	EC:2.7.1.2	COG1940	G	ROK family	ROK_0	Cellular metabolism	ROK family sugar kinase or transcriptional regulator				EC 2.7.1.2	Glucokinase	Glycolysis and Gluconeogenesis			MF0080,	Glycolysis (preparatory phase);	M00549,M00001,	Nucleotide sugar biosynthesis, glucose => UDP-glucose;Glycolysis (Embden-Meyerhof pathway), glucose => pyruvate;	Pathway module;	Carbohydrate and lipid metabolism;	Sugar metabolism;
fig|6666666.214148.peg.1910	MM4TEC2__C3_L=295657=	118790+155																			- none -
fig|6666666.214148.peg.1911	MM4TEC2__C3_L=295657=	119654-698					K07099	uncharacterized protein		COG1768	S	Calcineurin-like phosphoesterase								Ser/Thr protein phosphatase family protein	- none -
fig|6666666.214148.peg.1912	MM4TEC2__C3_L=295657=	119880-182																			- none -
fig|6666666.214148.peg.1913	MM4TEC2__C3_L=295657=	120617-671								ENOG4111F62	S	NA									- none -
fig|6666666.214148.peg.1914	MM4TEC2__C3_L=295657=	121027-332																			- none -
fig|6666666.214148.peg.1915	MM4TEC2__C3_L=295657=	121164+1502					K06409	stage V sporulation protein B		COG2244	M	Polysaccharide biosynthesis protein									- none -
fig|6666666.214148.peg.1916	MM4TEC2__C3_L=295657=	123192-539																			- none -
fig|6666666.214148.peg.1917	MM4TEC2__C3_L=295657=	123431+692								COG2323	S	Membrane									- none -
fig|6666666.214148.peg.1918	MM4TEC2__C3_L=295657=	124117+377																			- none -
fig|6666666.214148.peg.1919	MM4TEC2__C3_L=295657=	127410-2813					K03701	excinuclease ABC subunit A		COG0178	L	The UvrABC repair system catalyzes the recognition and processing of DNA lesions. UvrA is an ATPase and a DNA-binding protein. A damage recognition complex composed of 2 UvrA and 2 UvrB subunits scans DNA for abnormalities. When the presence of a lesion has been verified by UvrB, the UvrA molecules dissociate (By similarity)	Excinuclease_0	Intracellular survival and replication	Excinuclease ABC subunit A					Excinuclease ABC subunit A	DNA repair, UvrABC system
fig|6666666.214148.peg.192	MM4TEC2__C2_L=1925355=	154042-1427					K03628	transcription termination factor Rho		COG1158	K	Facilitates transcription termination by a mechanism that involves Rho binding to the nascent RNA, activation of Rho's RNA-dependent ATPase activity, and release of the mRNA from the DNA template (By similarity)				TTSS	Secretion system|Type III secretion system	type III secretion system ATPase			- none -	3.A.6	3.A.6
fig|6666666.214148.peg.1920	MM4TEC2__C3_L=295657=	129376-1958					K03702	excinuclease ABC subunit B		COG0556	L	damaged site, the DNA wraps around one UvrB monomer. DNA wrap is dependent on ATP binding by UvrB and probably causes local melting of the DNA helix, facilitating insertion of UvrB beta-hairpin between the DNA strands. Then UvrB probes one DNA strand for the presence of a lesion. If a lesion is found the UvrA subunits dissociate and the UvrB-DNA preincision complex is formed. This complex is subs…								Excinuclease ABC subunit B	DNA repair, UvrABC system
fig|6666666.214148.peg.1921	MM4TEC2__C3_L=295657=	129853-359																			- none -
fig|6666666.214148.peg.1922	MM4TEC2__C3_L=295657=	130240-371																			- none -
fig|6666666.214148.peg.1923	MM4TEC2__C3_L=295657=	130436+1664					K01895	acetyl-CoA synthetase	EC:6.2.1.1	COG0365	I	Catalyzes the conversion of acetate into acetyl-CoA (AcCoA), an essential intermediate at the junction of anabolic and catabolic pathways. AcsA undergoes a two-step reaction. In the first half reaction, AcsA combines acetate with ATP to form acetyl-adenylate (AcAMP) intermediate. In the second half reaction, it can then transfer the acetyl group from AcAMP to the sulfhydryl group of CoA, forming …	fadD5	Virulence	CoA ligase Long-chain fatty-acid-CoA ligase (EC 6.2.1.3), Mycobacterial subgroup FadD5				EC 6.2.1.1	Acetyl-CoA synthetase	- none -	4.C.1	4.C.1	MF0112,	acetate to acetyl-CoA;
fig|6666666.214148.peg.1924	MM4TEC2__C3_L=295657=	133642-1499																			- none -
fig|6666666.214148.peg.1925	MM4TEC2__C3_L=295657=	134694-998					K03569	rod shape-determining protein MreB and related proteins		COG1077	D	Rod shape-determining protein, MreB	Cell-shape_0	Intracellular survival and replication	Cell-shape determining protein MreBH						- none -	9.B.157	9.B.157
fig|6666666.214148.peg.1926	MM4TEC2__C3_L=295657=	135251-560					K06287	septum formation protein		COG0424	D	Maf-like protein								Septum formation protein Maf	Bacterial Cytoskeleton
fig|6666666.214148.peg.1927	MM4TEC2__C3_L=295657=	136819-1514					K01524	exopolyphosphatase / guanosine-5'-triphosphate,3'-diphosphate pyrophosphatase [EC:3.6.1.11 3.6.1.40]		COG0248	FP	ppx gppa phosphatase							EC 3.6.1.11	Exopolyphosphatase	Phosphate metabolism;Polyphosphate
fig|6666666.214148.peg.1928	MM4TEC2__C3_L=295657=	137754-656					K01091	phosphoglycolate phosphatase	EC:3.1.3.18	COG0546	S	had-superfamily hydrolase, subfamily ia, variant	Phosphoglycolate_0	Virulence|Intracellular survival and replication|Affect phagosome	Phosphoglycolate phosphatase (EC 3.1.3.18)				EC 3.1.3.18	Phosphoglycolate phosphatase	2-phosphoglycolate salvage;Glycolate, glyoxylate interconversions
fig|6666666.214148.peg.1929	MM4TEC2__C3_L=295657=	138541-785								COG2878	C	Electron transport complex									- none -	3.D.6	UT/RnfD/NqrB
fig|6666666.214148.peg.193	MM4TEC2__C2_L=1925355=	154539-371																			- none -
fig|6666666.214148.peg.1930	MM4TEC2__C3_L=295657=	139136-581					K03617	electron transport complex protein RnfA		COG4657	C	Electron transport complex								Electron transport complex protein RnfA	- none -	3.D.6	UT/RnfD/NqrB
fig|6666666.214148.peg.1931	MM4TEC2__C3_L=295657=	139804-671					K03613	electron transport complex protein RnfE		COG4660	C	Electron transport complex								Electron transport complex protein RnfE	- none -	3.D.6	UT/RnfD/NqrB
fig|6666666.214148.peg.1932	MM4TEC2__C3_L=295657=	140349-548																			- none -
fig|6666666.214148.peg.1933	MM4TEC2__C3_L=295657=	142517-2171					K03614	electron transport complex protein RnfD		COG4658	C	Electron transport complex								Electron transport complex protein RnfD	- none -	3.D.6	UT/RnfD/NqrB
fig|6666666.214148.peg.1934	MM4TEC2__C3_L=295657=	143848-1328					K03615	electron transport complex protein RnfC		COG4656	C	Required for nitrogen fixation. May be part of a membrane complex functioning as an intermediate in the electron transport to nitrogenase (By similarity)								Electron transport complex protein RnfC	- none -	3.D.6	UT/RnfD/NqrB
fig|6666666.214148.peg.1935	MM4TEC2__C3_L=295657=	144340-398					K07090	uncharacterized protein		ENOG41122DP	S	Sulfite exporter TauE/SafE									- none -
fig|6666666.214148.peg.1936	MM4TEC2__C3_L=295657=	144720-368					K07090	uncharacterized protein		ENOG411273I	S	permease									- none -
fig|6666666.214148.peg.1937	MM4TEC2__C3_L=295657=	144923+3611																			- none -
fig|6666666.214148.peg.1938	MM4TEC2__C3_L=295657=	149883-1280								COG0144	J	nOP2 Sun							EC 2.1.1.176	16S rRNA (cytosine(967)-C(5))-methyltransferase	RNA methylation
fig|6666666.214148.peg.1939	MM4TEC2__C3_L=295657=	150851-971					K02342	DNA polymerase III subunit epsilon	EC:2.7.7.7												- none -					M00260,	DNA polymerase III complex, bacteria;	Structural complex;	Genetic information processing;	DNA polymerase;
fig|6666666.214148.peg.194	MM4TEC2__C2_L=1925355=	155513-821					K04517	prephenate dehydrogenase	EC:1.3.1.12	COG0287	E	prephenate dehydrogenase							EC 1.3.1.43	Arogenate dehydrogenase	Chorismate Synthesis;Phenylalanine and Tyrosine Branches from Chorismate
fig|6666666.214148.peg.1940	MM4TEC2__C3_L=295657=	152208-1247								ENOG410XSD4	S	NA									- none -
fig|6666666.214148.peg.1941	MM4TEC2__C3_L=295657=	152333+653					K01243	adenosylhomocysteine nucleosidase	EC:3.2.2.9	COG0775	F	Catalyzes the irreversible cleavage of the glycosidic bond in both 5'-methylthioadenosine (MTA) and S- adenosylhomocysteine (SAH AdoHcy) to adenine and the corresponding thioribose, 5'-methylthioribose and S-ribosylhomocysteine, respectively (By similarity)							EC 3.2.2.16;EC 3.2.2.9	5&#39;-methylthioadenosine nucleosidase @ S-adenosylhomocysteine nucleosidase	Adenosyl nucleosidases;Adenosyl nucleosidases; <br>Methionine Degradation; <br>Polyamine Metabolism					M00609,M00034,	Cysteine biosynthesis, methionine => cysteine;Methionine salvage pathway;	Pathway module;	Nucleotide and amino acid metabolism;	Cysteine and methionine metabolism;
fig|6666666.214148.peg.1942	MM4TEC2__C3_L=295657=	152986+440					K07173	S-ribosylhomocysteine lyase	EC:4.4.1.21	COG1854	T	Involved in the synthesis of autoinducer 2 (AI-2) which is secreted by bacteria and is used to communicate both the cell density and the metabolic potential of the environment. The regulation of gene expression in response to changes in cell density is called quorum sensing. Catalyzes the transformation of S-ribosylhomocysteine (RHC) to homocysteine (HC) and 4,5- dihydroxy-2,3-pentadione (DPD) (B…				AI-2	Regulation|Quorum sensing system	S-ribosylhomocysteinase	EC 4.4.1.21	S-ribosylhomocysteine lyase @ Autoinducer-2 production protein LuxS	Methionine Degradation					M00609,	Cysteine biosynthesis, methionine => cysteine;	Pathway module;	Nucleotide and amino acid metabolism;	Cysteine and methionine metabolism;
fig|6666666.214148.peg.1943	MM4TEC2__C3_L=295657=	153419+680					K03648	uracil-DNA glycosylase	EC:3.2.2.27	COG0692	L	Excises uracil residues from the DNA which can arise as a result of misincorporation of dUMP residues by DNA polymerase or due to deamination of cytosine (By similarity)	Uracil-DNA_0	Virulence	Uracil-DNA glycosylase, family 1 (EC 3.2.2.27)					Uracil-DNA glycosylase, family 1	DNA Repair Base Excision;Uracil-DNA glycosylase
fig|6666666.214148.peg.1944	MM4TEC2__C3_L=295657=	154103+1211					K15635	2,3-bisphosphoglycerate-independent phosphoglycerate mutase	EC:5.4.2.12	COG3635	G	Catalyzes the interconversion of 2-phosphoglycerate and 3-phosphoglycerate (By similarity)								Predicted functional analog of homoserine kinase (EC 2.7.1.-)	Threonine and Homoserine Biosynthesis					M00001,M00002,	Glycolysis (Embden-Meyerhof pathway), glucose => pyruvate;Glycolysis, core module involving three-carbon compounds;	Pathway module;	Carbohydrate and lipid metabolism;	Central carbohydrate metabolism;
fig|6666666.214148.peg.1945	MM4TEC2__C3_L=295657=	156935-1583			AnimalCarb	PL12	K01953	asparagine synthase (glutamine-hydrolysing)	EC:6.3.5.4	COG0367	E	asparagine synthetase				LPS	Endotoxin	putative glutamine amidotransferase	EC 6.3.5.4	Asparagine synthetase [glutamine-hydrolyzing]	Glutamine, Glutamate, Aspartate and Asparagine Biosynthesis
fig|6666666.214148.peg.1946	MM4TEC2__C3_L=295657=	158132-1181					K10206	LL-diaminopimelate aminotransferase	EC:2.6.1.83	COG0436	E	aminotransferase							EC 2.6.1.83	L,L-diaminopimelate aminotransferase	Lysine Biosynthesis DAP Pathway;Lysine Biosynthesis DAP Pathway, GJO scratch					M00527,	Lysine biosynthesis, DAP aminotransferase pathway, aspartate => lysine;	Pathway module;	Nucleotide and amino acid metabolism;	Lysine metabolism;
fig|6666666.214148.peg.1947	MM4TEC2__C3_L=295657=	159037-833																	EC 5.1.1.7	Diaminopimelate epimerase	CBSS-84588.1.peg.1247;Lysine Biosynthesis DAP Pathway; <br>Lysine Biosynthesis DAP Pathway, GJO scratch
fig|6666666.214148.peg.1948	MM4TEC2__C3_L=295657=	159583-536					K07183	response regulator NasT		ENOG4111VXS	T	antar domain protein									- none -
fig|6666666.214148.peg.1949	MM4TEC2__C3_L=295657=	160316-722								COG0070	E	glutamate synthase								Glutamate synthase, alpha subunit domain protein	Ammonia assimilation
fig|6666666.214148.peg.195	MM4TEC2__C2_L=1925355=	155718+1751					K01876	aspartyl-tRNA synthetase	EC:6.1.1.12	COG0173	J	aspartyl-trna synthetase							EC 6.1.1.12;EC 6.1.1.23	Aspartyl-tRNA synthetase @ Aspartyl-tRNA(Asn) synthetase	tRNA aminoacylation, Asp and Asn;tRNA aminoacylation, Asp and Asn					M00359,M00360,	Aminoacyl-tRNA biosynthesis, eukaryotes;Aminoacyl-tRNA biosynthesis, prokaryotes;	Functional set;	Metabolism;	Aminoacyl tRNA;
fig|6666666.214148.peg.1950	MM4TEC2__C3_L=295657=	161836-1508								COG0069	E	glutamate synthase							EC 1.4.1.13	Glutamate synthase [NADPH] large chain	Ammonia assimilation;Glutamine, Glutamate, Aspartate and Asparagine Biosynthesis
fig|6666666.214148.peg.1951	MM4TEC2__C3_L=295657=	162939-1106								COG0067	E	glutamate synthase								Glutamine amidotransferase, class-II	Ammonia assimilation
fig|6666666.214148.peg.1952	MM4TEC2__C3_L=295657=	164897-1718					K03320	ammonium transporter, Amt family		COG0004	P	ammonium Transporter								Ammonium transporter	Ammonia assimilation	1.A.11	1.A.11
fig|6666666.214148.peg.1953	MM4TEC2__C3_L=295657=	167025-2081					K01915	glutamine synthetase	EC:6.3.1.2	COG3968	E	glutamine synthetase							EC 6.3.1.2	Glutamine synthetase type III, GlnN	Ammonia assimilation;Glutamine, Glutamate, Aspartate and Asparagine Biosynthesis; <br>Glutamine synthetases			MF0103,	nitrate reduction (assimilatory);
fig|6666666.214148.peg.1954	MM4TEC2__C3_L=295657=	167478-215																			- none -
fig|6666666.214148.peg.1955	MM4TEC2__C3_L=295657=	167995-512																			- none -
fig|6666666.214148.peg.1956	MM4TEC2__C3_L=295657=	168451-329																			- none -
fig|6666666.214148.peg.1957	MM4TEC2__C3_L=295657=	168602+2693																			- none -
fig|6666666.214148.peg.1958	MM4TEC2__C3_L=295657=	171337+305																			- none -
fig|6666666.214148.peg.1959	MM4TEC2__C3_L=295657=	171708+161																			- none -
fig|6666666.214148.peg.196	MM4TEC2__C2_L=1925355=	158131-650								COG4905	S	Protein of unknown function (DUF1113)									- none -
fig|6666666.214148.peg.1960	MM4TEC2__C3_L=295657=	172015+998																			- none -
fig|6666666.214148.peg.1961	MM4TEC2__C3_L=295657=	173245-161																			- none -
fig|6666666.214148.peg.1962	MM4TEC2__C3_L=295657=	174746-1286																			- none -
fig|6666666.214148.peg.1963	MM4TEC2__C3_L=295657=	175675-908																			- none -
fig|6666666.214148.peg.1964	MM4TEC2__C3_L=295657=	176519-860																			- none -
fig|6666666.214148.peg.1965	MM4TEC2__C3_L=295657=	180527-4001			AlpGlucans	GH13	K01187	alpha-glucosidase	EC:3.2.1.20	COG0366	G	alpha amylase, catalytic									- none -			MF0066,	glycogen metabolism;
fig|6666666.214148.peg.1966	MM4TEC2__C3_L=295657=	184525-3977			AlpGlucans	GH13	K01187	alpha-glucosidase	EC:3.2.1.20	COG0366	G	alpha amylase, catalytic									- none -			MF0066,	glycogen metabolism;
fig|6666666.214148.peg.1967	MM4TEC2__C3_L=295657=	185400-860				GH42	K10119	raffinose/stachyose/melibiose transport system permease protein		COG0395	G	Binding-protein-dependent transport systems inner membrane component	Maltodextrin_0	Virulence	Maltodextrin ABC transporter, permease protein MdxG						- none -	3.A.1	ABC			M00196,	Raffinose/stachyose/melibiose transport system;	Structural complex;	Environmental information processing;	Saccharide, polyol, and lipid transport system;
fig|6666666.214148.peg.1968	MM4TEC2__C3_L=295657=	186292-899					K02025	multiple sugar transport system permease protein		ENOG410Y2SR	P	Binding-protein-dependent transport systems inner membrane component	N-acetyl-D-glucosamine_0	Virulence	N-acetyl-D-glucosamine ABC transporter, permease protein 1						- none -	3.A.1	ABC			M00207,	Putative multiple sugar transport system;	Structural complex;	Environmental information processing;	Saccharide, polyol, and lipid transport system;
fig|6666666.214148.peg.1969	MM4TEC2__C3_L=295657=	187781-1481					K10117	raffinose/stachyose/melibiose transport system substrate-binding protein		COG1653	G	transporter activity									- none -					M00196,	Raffinose/stachyose/melibiose transport system;	Structural complex;	Environmental information processing;	Saccharide, polyol, and lipid transport system;
fig|6666666.214148.peg.197	MM4TEC2__C2_L=1925355=	158392-221																			- none -
fig|6666666.214148.peg.1970	MM4TEC2__C3_L=295657=	190741-2939				GH0				ENOG410XT3T	S	hydrolase family 2, sugar binding									- none -
fig|6666666.214148.peg.1971	MM4TEC2__C3_L=295657=	192165-1394								ENOG4111I78	S	NA									- none -
fig|6666666.214148.peg.1972	MM4TEC2__C3_L=295657=	194273-2111																		diguanylate cyclase/phosphodiesterase (GGDEF & EAL domains) with PAS/PAC sensor(s)	- none -
fig|6666666.214148.peg.1973	MM4TEC2__C3_L=295657=	195303-1010					K03604	LacI family transcriptional regulator, purine nucleotide synthesis repressor		COG1609	K	Transcriptional regulator				BopD	Biofilm formation	LacI family sugar-binding transcriptional regulator			- none -
fig|6666666.214148.peg.1974	MM4TEC2__C3_L=295657=	196118-644																			- none -
fig|6666666.214148.peg.1975	MM4TEC2__C3_L=295657=	196300+161																			- none -
fig|6666666.214148.peg.1976	MM4TEC2__C3_L=295657=	197580-917								COG4989	C	Aldo keto reductase								Putative oxidoreductase SCO7655	- none -	8.A.5	8.A.5
fig|6666666.214148.peg.1977	MM4TEC2__C3_L=295657=	197725+731				GT2	K01990	ABC-2 type transport system ATP-binding protein		COG1131	V	(ABC) transporter	Choline_0	Stress|Bile resistance|Intracellular survival and replication	Choline ABC transport system, ATP-binding protein OpuBA	PDIM	Cell wall	daunorubicin resistance ABC transporter ATP-binding subunit		ABC transporter, ATP-binding protein	- none -	3.A.1	ABC			M00254,	ABC-2 type transport system;	Structural complex;	Environmental information processing;	ABC-2 type and other transport systems;
fig|6666666.214148.peg.1978	MM4TEC2__C3_L=295657=	198446+1586					K01992	ABC-2 type transport system permease protein		ENOG410ZVCQ	S	NA									- none -	3.A.1	ABC			M00254,	ABC-2 type transport system;	Structural complex;	Environmental information processing;	ABC-2 type and other transport systems;
fig|6666666.214148.peg.1979	MM4TEC2__C3_L=295657=	202032-1937				GT4	K06147	ATP-binding cassette, subfamily B, bacterial		COG1132	V	(ABC) transporter	Efflux_0	Virulence	Efflux ABC transporter, permeaseATP-binding protein SCO2464	LOS	Adherence|Endotoxin	lipid A export ATP-binding protein MsbA		ABC transporter, ATP-binding/permease protein	- none -	3.A.1	ABC
fig|6666666.214148.peg.198	MM4TEC2__C2_L=1925355=	158771+566					K01737	6-pyruvoyltetrahydropterin/6-carboxytetrahydropterin synthase [EC:4.2.3.12 4.1.2.50]		ENOG410XRNJ	S	6-pyruvoyl tetrahydropterin synthase									- none -
fig|6666666.214148.peg.1980	MM4TEC2__C3_L=295657=	203779-1760				GT4	K06147	ATP-binding cassette, subfamily B, bacterial		COG1132	V	(ABC) transporter	Efflux_0	Virulence	Efflux ABC transporter, permeaseATP-binding protein SCO2464	LOS	Adherence|Endotoxin	lipid A export ATP-binding protein MsbA		ABC transporter, ATP-binding/permease protein	- none -	3.A.1	ABC
fig|6666666.214148.peg.1981	MM4TEC2__C3_L=295657=	204295-440								ENOG410XUB6	K	Transcriptional regulator, MarR Family								Transcriptional regulator, MarR family	- none -
fig|6666666.214148.peg.1982	MM4TEC2__C3_L=295657=	204375+728								COG3619	S	membrAne									- none -	9.B.143	MFS
fig|6666666.214148.peg.1983	MM4TEC2__C3_L=295657=	206107-989					K01914	aspartate--ammonia ligase	EC:6.3.1.1	COG2502	E	asparagine synthetase a							EC 6.3.1.1	Aspartate--ammonia ligase	Glutamine, Glutamate, Aspartate and Asparagine Biosynthesis
fig|6666666.214148.peg.1984	MM4TEC2__C3_L=295657=	206805-641								COG0637	S	HAD-superfamily hydrolase subfamily IA variant 3							EC 5.4.2.6	Beta-phosphoglucomutase	Maltose and Maltodextrin Utilization;Trehalose Uptake and Utilization
fig|6666666.214148.peg.1985	MM4TEC2__C3_L=295657=	206809+125																			- none -
fig|6666666.214148.peg.1986	MM4TEC2__C3_L=295657=	206951+983																			- none -
fig|6666666.214148.peg.1987	MM4TEC2__C3_L=295657=	207921+476																			- none -
fig|6666666.214148.peg.1988	MM4TEC2__C3_L=295657=	209462-1016					K00134	glyceraldehyde 3-phosphate dehydrogenase	EC:1.2.1.12	COG0057	G	glyceraldehyde3phosphate dehydrogenase							EC 1.2.1.12	NAD-dependent glyceraldehyde-3-phosphate dehydrogenase	Glycolysis and Gluconeogenesis;Pyridoxin (Vitamin B6) Biosynthesis			MF0081,	Glycolysis (pay-off phase);
fig|6666666.214148.peg.1989	MM4TEC2__C3_L=295657=	210685-1115					K19689	aminopeptidase [EC:3.4.11.-]		COG2309	E	aminopeptidase								Aminopeptidase	- none -
fig|6666666.214148.peg.199	MM4TEC2__C2_L=1925355=	161368-1892					K06147	ATP-binding cassette, subfamily B, bacterial		COG1132	V	(ABC) transporter	Efflux_0	Virulence	Efflux ABC transporter, permeaseATP-binding protein SCO2464	LOS	Adherence|Endotoxin	lipid A export ATP-binding/permease protein		ABC transporter, ATP-binding/permease protein	- none -	3.A.1	ABC
fig|6666666.214148.peg.1990	MM4TEC2__C3_L=295657=	210836+935					K01624	fructose-bisphosphate aldolase, class II	EC:4.1.2.13	COG0191	G	Aldolase	kbaY	Biofilm	D-tagatose-1,6-bisphosphate aldolase subunit KbaY (EC 4.1.2.40)				EC 4.1.2.13	Fructose-bisphosphate aldolase class II	Glycolysis and Gluconeogenesis			MF0080,	Glycolysis (preparatory phase);
fig|6666666.214148.peg.1991	MM4TEC2__C3_L=295657=	212450-611								ENOG410YNY1	S	NA									- none -
fig|6666666.214148.peg.1992	MM4TEC2__C3_L=295657=	212471+140																			- none -
fig|6666666.214148.peg.1993	MM4TEC2__C3_L=295657=	212625+380					K03711	Fur family transcriptional regulator, ferric uptake regulator		COG0735	K	Ferric uptake regulator, Fur family	Peroxide_0	Stress|Regulation of gene expression|Stress	Peroxide stress regulator PerR, FUR family						- none -
fig|6666666.214148.peg.1994	MM4TEC2__C3_L=295657=	213026+542								COG1592	C	Rubrerythrin								Rubrerythrin	Rubrerythrin
fig|6666666.214148.peg.1995	MM4TEC2__C3_L=295657=	213596+632								COG1853	S	flavin reductase domain protein, FMN-binding								Rubredoxin	Rubrerythrin
fig|6666666.214148.peg.1996	MM4TEC2__C3_L=295657=	215786-1442				GT2	K16787	energy-coupling factor transport system ATP-binding protein [EC:3.6.3.-]		COG1122	P	ATPase activity	Maltodextrin_0	Virulence	Maltodextrin ABC transporter, ATP-binding protein MsmX	Acinetobactin	Iron uptake|Siderophore	ABC-type enterochelin transport system, ATPase component		ABC transporter related	- none -	3.A.1	ABC
fig|6666666.214148.peg.1997	MM4TEC2__C3_L=295657=	216451-677					K16785	energy-coupling factor transport system permease protein		ENOG410XWFV	P	Cobalt transport protein									- none -	3.A.1	ABC
fig|6666666.214148.peg.1998	MM4TEC2__C3_L=295657=	217125-674					K16929	energy-coupling factor transport system substrate-specific component		ENOG410YTTG	S	Hypothetical bacterial integral membrane protein (Trep_Strep)									- none -	3.A.1	ABC
fig|6666666.214148.peg.1999	MM4TEC2__C3_L=295657=	218816-1694				GT4	K06148	ATP-binding cassette, subfamily C, bacterial		COG1132	V	(ABC) transporter	Efflux_0	Virulence	Efflux ABC transporter, permeaseATP-binding protein SCO2464					ABC transporter	- none -	3.A.1	ABC
fig|6666666.214148.peg.2	MM4TEC2__C1_L=46754=	165+800					K06223	DNA adenine methylase	EC:2.1.1.72	COG0338	L	site-specific DNA-methyltransferase (adenine-specific) activity								Type II, N-methyl DNA methyltransferase (group alpha)	- none -
fig|6666666.214148.peg.20	MM4TEC2__C1_L=46754=	14276-272																			- none -
fig|6666666.214148.peg.200	MM4TEC2__C2_L=1925355=	163106-1745				GT4	K06147	ATP-binding cassette, subfamily B, bacterial		COG1132	V	(ABC) transporter	Efflux_0	Virulence	Efflux ABC transporter, permeaseATP-binding protein SCO2464	LOS	Adherence|Endotoxin	lipid A export ATP-binding/permease protein		ABC transporter, ATP-binding/permease protein	- none -	3.A.1	ABC
fig|6666666.214148.peg.2000	MM4TEC2__C3_L=295657=	220531-1718				GT4	K06148	ATP-binding cassette, subfamily C, bacterial		COG4988	V	cysteine transport	Efflux_0	Virulence	Efflux ABC transporter, permeaseATP-binding protein SCO2464	LOS	Adherence|Endotoxin	lipid A export ATP-binding/permease protein		ABC transporter, permease/ATP-binding protein	- none -	3.A.1	ABC
fig|6666666.214148.peg.2001	MM4TEC2__C3_L=295657=	221054-377								ENOG41121K2	S	cytoplasmic protein									- none -
fig|6666666.214148.peg.2002	MM4TEC2__C3_L=295657=	221355-299																			- none -
fig|6666666.214148.peg.2003	MM4TEC2__C3_L=295657=	221977-368								COG1321	K	cellular manganese ion homeostasis	Iron-dependent_0	Regulation of gene expression|Iron uptake|Cellular metabolism	Iron-dependent repressor IdeRDtxR						- none -
fig|6666666.214148.peg.2004	MM4TEC2__C3_L=295657=	223366-1196				CE11	K11927	ATP-dependent RNA helicase RhlE	EC:3.6.4.13	COG0513	L	purine NTP-dependent helicase activity	ATP-dependent_0	Virulence	ATP-dependent helicase					ATP-dependent RNA helicase RhlE	ATP-dependent RNA helicases, bacterial	1.I.1	PK
fig|6666666.214148.peg.2005	MM4TEC2__C3_L=295657=	223513+884								COG1284	S	membrane								hypothetical protein BH3604	- none -	2.A.115	2.A.115
fig|6666666.214148.peg.2006	MM4TEC2__C3_L=295657=	224412+497					K00567	methylated-DNA-[protein]-cysteine S-methyltransferase	EC:2.1.1.63	COG0350	L	Involved in the cellular defense against the biological effects of O6-methylguanine (O6-MeG) in DNA. Repairs alkylated guanine in DNA by stoichiometrically transferring the alkyl group at the O-6 position to a cysteine residue in the enzyme. This is a suicide reaction the enzyme is irreversibly inactivated (By similarity)							EC 2.1.1.63	Methylated-DNA--protein-cysteine methyltransferase	DNA repair, bacterial
fig|6666666.214148.peg.2007	MM4TEC2__C3_L=295657=	227044-2099					K00962	polyribonucleotide nucleotidyltransferase	EC:2.7.7.8	COG1185	J	Involved in mRNA degradation. Hydrolyzes single-stranded polyribonucleotides processively in the 3'- to 5'-direction (By similarity)							EC 2.7.7.8	Polyribonucleotide nucleotidyltransferase	CBSS-1806.1.peg.3045
fig|6666666.214148.peg.2008	MM4TEC2__C3_L=295657=	227399-263					K02956	small subunit ribosomal protein S15		COG0184	J	Forms an intersubunit bridge (bridge B4) with the 23S rRNA of the 50S subunit in the ribosome (By similarity)								SSU ribosomal protein S15p (S13e)	- none -					M00179,M00178,	Ribosome, archaea;Ribosome, bacteria;	Structural complex;	Genetic information processing;	Ribosome;
fig|6666666.214148.peg.2009	MM4TEC2__C3_L=295657=	228888-1370					K02495	oxygen-independent coproporphyrinogen III oxidase	EC:1.3.99.22	COG0635	H	Coproporphyrinogen III oxidase	Hypothetical_0	Virulence	Hypothetical radical SAM family enzyme in heat shock gene cluster, similarity with CPO of BS HemN-type					Hypothetical radical SAM family enzyme, NOT coproporphyrinogen III oxidase, oxygen-independent	Heat shock dnaK gene cluster extended					M00121,	Heme biosynthesis, glutamate => protoheme/siroheme;	Pathway module;	Nucleotide and amino acid metabolism;	Cofactor and vitamin biosynthesis;
fig|6666666.214148.peg.201	MM4TEC2__C2_L=1925355=	163625-431								ENOG410XUB6	K	Transcriptional regulator, MarR Family									- none -
fig|6666666.214148.peg.2010	MM4TEC2__C3_L=295657=	229498-605								COG0491	S	Beta-lactamase domain protein							EC 3.1.2.6	Hydroxyacylglutathione hydrolase	Glutathione: Non-redox reactions
fig|6666666.214148.peg.2011	MM4TEC2__C3_L=295657=	231690-2135					K00951	GTP pyrophosphokinase	EC:2.7.6.5	COG0317	KT	In eubacteria ppGpp (guanosine 3'-diphosphate 5-' diphosphate) is a mediator of the stringent response that coordinates a variety of cellular activities in response to changes in nutritional abundance (By similarity)	relA	Intracellular survival and replication|Cellular metabolism	Guanosine-3,5-bis(diphosphate) 3-pyrophosphohydrolase (EC 3.1.7.2) GTP pyrophosphokinase (EC 2.7.6.5), (p)ppGpp synthetase II				EC 3.1.7.2;EC 2.7.6.5	Guanosine-3&#39;,5&#39;-bis(diphosphate) 3&#39;-pyrophosphohydrolase / GTP pyrophosphokinase , (p)ppGpp synthetase II	Stringent Response, (p)ppGpp metabolism;Stringent Response, (p)ppGpp metabolism
fig|6666666.214148.peg.2012	MM4TEC2__C3_L=295657=	234004-2312					K07462	single-stranded-DNA-specific exonuclease [EC:3.1.-.-]		COG0608	L	Single-stranded-DNA-specific exonuclease (RecJ)								Single-stranded-DNA-specific exonuclease RecJ (EC 3.1.-.-)	DNA Repair Base Excision
fig|6666666.214148.peg.2013	MM4TEC2__C3_L=295657=	235128-1043																			- none -
fig|6666666.214148.peg.2014	MM4TEC2__C3_L=295657=	236572-1451																			- none -
fig|6666666.214148.peg.2015	MM4TEC2__C3_L=295657=	237206-491								COG0663	S	Transferase				RicA	Intracellular survival	Rab2 interacting conserved protein A		carbonic anhydrase, family 3	- none -
fig|6666666.214148.peg.2016	MM4TEC2__C3_L=295657=	238580-1325					K06871	uncharacterized protein		COG0641	S	radical SAM domain protein	Putative_0	Virulence	Putative arylsulfatase regulatory protein					SCIFF radical SAM maturase	- none -
fig|6666666.214148.peg.2017	MM4TEC2__C3_L=295657=	238802-161																			- none -
fig|6666666.214148.peg.2018	MM4TEC2__C3_L=295657=	239255-386																			- none -
fig|6666666.214148.peg.2019	MM4TEC2__C3_L=295657=	239758-431																			- none -
fig|6666666.214148.peg.202	MM4TEC2__C2_L=1925355=	166103-2162																			- none -
fig|6666666.214148.peg.2020	MM4TEC2__C3_L=295657=	240999-1118					K00773	queuine tRNA-ribosyltransferase	EC:2.4.2.29	COG0343	J	Exchanges the guanine residue with 7-aminomethyl-7- deazaguanine in tRNAs with GU(N) anticodons (tRNA-Asp, -Asn, -His and -Tyr). After this exchange, a cyclopentendiol moiety is attached to the 7-aminomethyl group of 7-deazaguanine, resulting in the hypermodified nucleoside queuosine (Q) (7-(((4,5-cis- dihydroxy-2-cyclopenten-1-yl)amino)methyl)-7-deazaguanosine) (By similarity)							EC 2.4.2.29	tRNA-guanine transglycosylase	Queuosine-Archaeosine Biosynthesis
fig|6666666.214148.peg.2021	MM4TEC2__C3_L=295657=	242038-1022					K07568	S-adenosylmethionine:tRNA ribosyltransferase-isomerase	EC:2.4.99.17	COG0809	J	Transfers and isomerizes the ribose moiety from AdoMet to the 7-aminomethyl group of 7-deazaguanine (preQ1-tRNA) to give epoxyqueuosine (oQ-tRNA) (By similarity)								S-adenosylmethionine:tRNA ribosyltransferase-isomerase (EC 5.-.-.-)	Queuosine-Archaeosine Biosynthesis
fig|6666666.214148.peg.2022	MM4TEC2__C3_L=295657=	242817-785								ENOG410YU6X	S	Gcn5-related n-acetyltransferase								GCN5-related N-acetyltransferase	- none -
fig|6666666.214148.peg.2023	MM4TEC2__C3_L=295657=	243856-1046					K03551	holliday junction DNA helicase RuvB	EC:3.6.4.12	COG2255	L	The RuvA-RuvB complex in the presence of ATP renatures cruciform structure in supercoiled DNA with palindromic sequence, indicating that it may promote strand exchange reactions in homologous recombination. RuvAB is a helicase that mediates the Holliday junction migration by localized denaturation and reannealing (By similarity)	Holliday_0	Intracellular survival and replication	Holliday junction ATP-dependent DNA helicase RuvB (EC 3.6.4.12)					Holliday junction DNA helicase RuvB	RuvABC plus a hypothetical
fig|6666666.214148.peg.2024	MM4TEC2__C3_L=295657=	244456-584					K03550	holliday junction DNA helicase RuvA	EC:3.6.4.12	COG0632	L	The RuvA-RuvB complex in the presence of ATP renatures cruciform structure in supercoiled DNA with palindromic sequence, indicating that it may promote strand exchange reactions in homologous recombination. RuvAB is a helicase that mediates the Holliday junction migration by localized denaturation and reannealing. RuvA stimulates, in the presence of DNA, the weak ATPase activity of RuvB (By simil…								Holliday junction DNA helicase RuvA	RuvABC plus a hypothetical	3.A.11	3.A.11
fig|6666666.214148.peg.2025	MM4TEC2__C3_L=295657=	244961-494					K01159	crossover junction endodeoxyribonuclease RuvC	EC:3.1.22.4	COG0817	L	Nuclease that resolves Holliday junction intermediates in genetic recombination. Cleaves the cruciform structure in supercoiled DNA by nicking to strands with the same polarity at sites symmetrically opposed at the junction in the homologous arms and leaves a 5'-terminal phosphate and a 3'-terminal hydroxyl group (By similarity)							EC 3.1.22.4	Crossover junction endodeoxyribonuclease RuvC	RuvABC plus a hypothetical
fig|6666666.214148.peg.2026	MM4TEC2__C3_L=295657=	245117+1382					K01755	argininosuccinate lyase	EC:4.3.2.1	COG0165	E	argininosuccinate lyase							EC 4.3.2.1	Argininosuccinate lyase	Arginine Biosynthesis -- gjo;Arginine Biosynthesis extended					M00029,	Urea cycle;	Pathway module;	Nucleotide and amino acid metabolism;	Arginine and proline metabolism;
fig|6666666.214148.peg.2027	MM4TEC2__C3_L=295657=	247715-1169					K09696	sodium transport system permease protein		COG1668	CP	(ABC) transporter									- none -	3.A.1	ABC			M00253,	Sodium transport system;	Structural complex;	Environmental information processing;	ABC-2 type and other transport systems;
fig|6666666.214148.peg.2028	MM4TEC2__C3_L=295657=	248487-779				GT2	K09697	sodium transport system ATP-binding protein		COG4555	CP	(ABC) transporter	ATP-dependent_0	Virulence	ATP-dependent efflux pump essential for phthiocerol dimycocerosates translocation, ATP-binding protein DrrA-like	PDIM	Cell wall	daunorubicin-DIM-transport ATP-binding protein ABC transporter DrrA		ABC transporter, ATP-binding protein	- none -	3.A.1	ABC			M00253,	Sodium transport system;	Structural complex;	Environmental information processing;	ABC-2 type and other transport systems;
fig|6666666.214148.peg.2029	MM4TEC2__C3_L=295657=	248817+464					K01104	protein-tyrosine phosphatase	EC:3.1.3.48	COG0394	T	PHOsphatase	Low_0	Virulence|Intracellular survival and replication|Affect phagosome	Low molecular weight protein tyrosine phosphatase (EC 3.1.3.48)				EC 3.1.3.48	Low molecular weight protein tyrosine phosphatase	LMPTP YfkJ cluster
fig|6666666.214148.peg.203	MM4TEC2__C2_L=1925355=	169647-3422	mfd	CINOXACIN,CIPROFLOXACIN,CLINAFLOXACIN,CLOFAZIMINE,ENOXACIN,FLEROXACIN,FLUOROQUINOLONE ANTIBIOTIC,GATIFLOXACIN,GREPAFLOXACIN,LEVOFLOXACIN,LOMEFLOXACIN,MOXIFLOXACIN,NALIDIXIC ACID,NORFLOXACIN,OFLOXACIN,PEFLOXACIN,SITAFLOXACIN,SPARFLOXACIN,TROVAFLOXACIN,ALL			K03723	transcription-repair coupling factor (superfamily II helicase) [EC:3.6.4.-]		COG1197	L	transcriptioN-repair coupling factor	Transcription-repair_0	Virulence	Transcription-repair coupling factor					Transcription-repair coupling factor	Cell division-ribosomal stress proteins cluster;Transcription factors bacterial	3.A.11	3.A.11
fig|6666666.214148.peg.2030	MM4TEC2__C3_L=295657=	253388-3818																			- none -
fig|6666666.214148.peg.2031	MM4TEC2__C3_L=295657=	253416+116																			- none -
fig|6666666.214148.peg.2032	MM4TEC2__C3_L=295657=	256831-3005				GH0				ENOG410ZVJX	S	NA									- none -
fig|6666666.214148.peg.2033	MM4TEC2__C3_L=295657=	257900-869																			- none -
fig|6666666.214148.peg.2034	MM4TEC2__C3_L=295657=	260162-2243			PlantCW,AnimalCarb	GH95	K15923	alpha-L-fucosidase 2	EC:3.2.1.51	ENOG410XPGV	S	alpha-l-fucosidase								Putative large secreted protein	- none -
fig|6666666.214148.peg.2035	MM4TEC2__C3_L=295657=	261393-1226								COG0657	I	alpha beta hydrolase fold-3 domain protein									- none -
fig|6666666.214148.peg.2036	MM4TEC2__C3_L=295657=	262442-1052								ENOG4112B6F	S	NA									- none -
fig|6666666.214148.peg.2037	MM4TEC2__C3_L=295657=	263518-1073				CE2				ENOG4111J8W	S	lipolytic protein G-D-S-L family									- none -
fig|6666666.214148.peg.2038	MM4TEC2__C3_L=295657=	265877-2354				GH65	K18784	3-O-alpha-D-glucosyl-L-rhamnose phosphorylase	EC:2.4.1.282	COG1554	G	hydrolase family 65							EC 2.4.1.8;EC 2.4.1.64	Maltose phosphorylase / Trehalose phosphorylase	Maltose and Maltodextrin Utilization;Trehalose Biosynthesis; <br>Trehalose Uptake and Utilization
fig|6666666.214148.peg.2039	MM4TEC2__C3_L=295657=	265968+1127								COG1609	K	Transcriptional regulator									- none -
fig|6666666.214148.peg.204	MM4TEC2__C2_L=1925355=	170286-566					K01056	peptidyl-tRNA hydrolase, PTH1 family	EC:3.1.1.29	COG0193	J	The natural substrate for this enzyme may be peptidyl- tRNAs which drop off the ribosome during protein synthesis (By similarity)							EC 3.1.1.29	Peptidyl-tRNA hydrolase	Cell division-ribosomal stress proteins cluster;Sporulation-associated proteins with broader functions; <br>Translation termination factors bacterial
fig|6666666.214148.peg.2040	MM4TEC2__C3_L=295657=	268165-1022																			- none -
fig|6666666.214148.peg.2041	MM4TEC2__C3_L=295657=	269328-1151																			- none -
fig|6666666.214148.peg.2042	MM4TEC2__C3_L=295657=	270224-875				GH130	K02026	multiple sugar transport system permease protein		COG0395	G	Binding-protein-dependent transport systems inner membrane component	Maltodextrin_0	Virulence	Maltodextrin ABC transporter, permease protein MdxG						- none -	3.A.1	ABC
fig|6666666.214148.peg.2043	MM4TEC2__C3_L=295657=	271205-980					K10118	raffinose/stachyose/melibiose transport system permease protein		COG1175	P	binding-protein-dependent transport systems inner membrane Component	N-acetyl-D-glucosamine_0	Virulence	N-acetyl-D-glucosamine ABC transporter, permease protein 1						- none -	3.A.1	ABC			M00196,	Raffinose/stachyose/melibiose transport system;	Structural complex;	Environmental information processing;	Saccharide, polyol, and lipid transport system;
fig|6666666.214148.peg.2044	MM4TEC2__C3_L=295657=	272785-1559					K10117	raffinose/stachyose/melibiose transport system substrate-binding protein													- none -					M00196,	Raffinose/stachyose/melibiose transport system;	Structural complex;	Environmental information processing;	Saccharide, polyol, and lipid transport system;
fig|6666666.214148.peg.2045	MM4TEC2__C3_L=295657=	275176-2366																			- none -
fig|6666666.214148.peg.2046	MM4TEC2__C3_L=295657=	276679-1067					K05499	LacI family transcriptional regulator, repressor for deo operon, udp, cdd, tsx, nupC, and nupG		COG1609	K	Transcriptional regulator									- none -
fig|6666666.214148.peg.2047	MM4TEC2__C3_L=295657=	277852-1130				CE2				ENOG4111J8W	S	lipolytic protein G-D-S-L family									- none -
fig|6666666.214148.peg.2048	MM4TEC2__C3_L=295657=	279037-1178				CE2				ENOG4111J8W	S	lipolytic protein G-D-S-L family									- none -
fig|6666666.214148.peg.2049	MM4TEC2__C3_L=295657=	282123-3089								ENOG410XYJD	S	NA									- none -
fig|6666666.214148.peg.205	MM4TEC2__C2_L=1925355=	171298-953					K00948	ribose-phosphate pyrophosphokinase	EC:2.7.6.1	COG0462	F	Phosphoribosyl pyrophosphate synthase							EC 2.7.6.1	Ribose-phosphate pyrophosphokinase	De Novo Purine Biosynthesis;Pentose phosphate pathway					M00005,	PRPP biosynthesis, ribose 5P => PRPP;	Pathway module;	Carbohydrate and lipid metabolism;	Central carbohydrate metabolism;
fig|6666666.214148.peg.2050	MM4TEC2__C3_L=295657=	284003-1796																			- none -
fig|6666666.214148.peg.2051	MM4TEC2__C3_L=295657=	286367-2300																			- none -
fig|6666666.214148.peg.2052	MM4TEC2__C3_L=295657=	287287-908				GH130	K02026	multiple sugar transport system permease protein		COG0395	G	Binding-protein-dependent transport systems inner membrane component	Maltodextrin_0	Virulence	Maltodextrin ABC transporter, permease protein MdxG						- none -	3.A.1	ABC
fig|6666666.214148.peg.2053	MM4TEC2__C3_L=295657=	288215-923					K02025	multiple sugar transport system permease protein		COG1175	P	binding-protein-dependent transport systems inner membrane Component	N-acetyl-D-glucosamine_0	Virulence	N-acetyl-D-glucosamine ABC transporter, permease protein 1					N-Acetyl-D-glucosamine ABC transport system, permease protein 1	- none -	3.A.1	ABC			M00207,	Putative multiple sugar transport system;	Structural complex;	Environmental information processing;	Saccharide, polyol, and lipid transport system;
fig|6666666.214148.peg.2054	MM4TEC2__C3_L=295657=	289580-1355					K02027	multiple sugar transport system substrate-binding protein		COG1653	G	transporter activity									- none -					M00207,	Putative multiple sugar transport system;	Structural complex;	Environmental information processing;	Saccharide, polyol, and lipid transport system;
fig|6666666.214148.peg.2055	MM4TEC2__C3_L=295657=	292194-2564																			- none -
fig|6666666.214148.peg.2056	MM4TEC2__C3_L=295657=	293624-1415																			- none -
fig|6666666.214148.peg.2057	MM4TEC2__C3_L=295657=	295326-1598			PlantCW	GH78				ENOG410XRPP	S	Bacterial alpha-L-rhamnosidase							EC 3.2.1.40	Alfa-L-rhamnosidase	- none -
fig|6666666.214148.peg.2058	MM4TEC2__C3_L=295657=	295511-131																			- none -
fig|6666666.214148.peg.2059	MM4TEC2__C4_L=157425=	278+1406					K02027	multiple sugar transport system substrate-binding protein		ENOG410XPXC	S	solute-binding protein								Glycerol-3-phosphate ABC transporter, periplasmic glycerol-3-phosphate-binding protein (TC 3.A.1.1.3)	Glycerol and Glycerol-3-phosphate Uptake and Utilization					M00207,	Putative multiple sugar transport system;	Structural complex;	Environmental information processing;	Saccharide, polyol, and lipid transport system;
fig|6666666.214148.peg.206	MM4TEC2__C2_L=1925355=	171610+599																			- none -
fig|6666666.214148.peg.2060	MM4TEC2__C4_L=157425=	1688+3014								ENOG410XNMH	T	Histidine kinase	Sensory_0	Virulence	Sensory boxGGDEF family protein					diguanylate cyclase/phosphodiesterase (GGDEF & EAL domains) with PAS/PAC sensor(s)	- none -	9.B.34	BART
fig|6666666.214148.peg.2061	MM4TEC2__C4_L=157425=	4721+2306			PlantCW,AnimalCarb	GH2				ENOG410XNMH	T	Histidine kinase	Sensory_0	Virulence	Sensory boxGGDEF family protein					diguanylate cyclase/phosphodiesterase (GGDEF & EAL domains) with PAS/PAC sensor(s)	- none -	9.B.34	BART
fig|6666666.214148.peg.2062	MM4TEC2__C4_L=157425=	7119+1403				GT2				ENOG410XNMH	T	Histidine kinase								diguanylate cyclase/phosphodiesterase (GGDEF & EAL domains) with PAS/PAC sensor(s)	- none -
fig|6666666.214148.peg.2063	MM4TEC2__C4_L=157425=	8730+683																			- none -
fig|6666666.214148.peg.2064	MM4TEC2__C4_L=157425=	9472+938																			- none -
fig|6666666.214148.peg.2065	MM4TEC2__C4_L=157425=	10531+695					K13280	signal peptidase, endoplasmic reticulum-type [EC:3.4.-.-]		COG0681	U	Signal peptidase i									- none -
fig|6666666.214148.peg.2066	MM4TEC2__C4_L=157425=	11274+1541								COG1401	V	restriction endodeoxyribonuclease activity								hypothetical surface-anchored protein	- none -
fig|6666666.214148.peg.2067	MM4TEC2__C4_L=157425=	12835+1619								ENOG41128KA	S	NA									- none -
fig|6666666.214148.peg.2068	MM4TEC2__C4_L=157425=	14441+596																			- none -
fig|6666666.214148.peg.2069	MM4TEC2__C4_L=157425=	15141+794																			- none -
fig|6666666.214148.peg.207	MM4TEC2__C2_L=1925355=	172283+707																			- none -
fig|6666666.214148.peg.2070	MM4TEC2__C4_L=157425=	16076+815																			- none -
fig|6666666.214148.peg.2071	MM4TEC2__C4_L=157425=	17027+530								COG1592	C	Rubrerythrin								Rubrerythrin	Rubrerythrin
fig|6666666.214148.peg.2072	MM4TEC2__C4_L=157425=	18118-476																			- none -
fig|6666666.214148.peg.2073	MM4TEC2__C4_L=157425=	18301+767					K02108	F-type H+-transporting ATPase subunit a		COG0356	C	it plays a direct role in the translocation of protons across the membrane (By similarity)	atpB	Virulence	ATP synthase F0 sector subunit a (EC 3.6.3.14)					ATP synthase F0 sector subunit a	- none -	3.A.2	3.A.2			M00157,	F-type ATPase, prokaryotes and chloroplasts;	Structural complex;	Energy metabolism;	ATP synthesis;
fig|6666666.214148.peg.2074	MM4TEC2__C4_L=157425=	19172+275																	EC 3.6.3.14	ATP synthase F0 sector subunit c	- none -
fig|6666666.214148.peg.2075	MM4TEC2__C4_L=157425=	19475+533								COG0711	C	F(1)F(0) ATP synthase produces ATP from ADP in the presence of a proton or sodium gradient. F-type ATPases consist of two structural domains, F(1) containing the extramembraneous catalytic core and F(0) containing the membrane proton channel, linked together by a central stalk and a peripheral stalk. During catalysis, ATP synthesis in the catalytic domain of F(1) is coupled via a rotary mechanism…									- none -
fig|6666666.214148.peg.2076	MM4TEC2__C4_L=157425=	20010+218																	EC 3.6.3.14	ATP synthase delta chain	- none -
fig|6666666.214148.peg.2077	MM4TEC2__C4_L=157425=	20247+1541					K02111	F-type H+-transporting ATPase subunit alpha	EC:3.6.3.14	COG0056	C	Produces ATP from ADP in the presence of a proton gradient across the membrane. The alpha chain is a regulatory subunit (By similarity)	Type_0	Type III secretion	Type III secretion cytoplasmic ATP synthase (EC 3.6.3.14, YscN,SpaL,MxiB,HrcN,EscN)				EC 3.6.3.14	ATP synthase alpha chain	- none -	3.A.2	3.A.2			M00157,	F-type ATPase, prokaryotes and chloroplasts;	Structural complex;	Energy metabolism;	ATP synthesis;
fig|6666666.214148.peg.2078	MM4TEC2__C4_L=157425=	21781+863					K02115	F-type H+-transporting ATPase subunit gamma		COG0224	C	Produces ATP from ADP in the presence of a proton gradient across the membrane. The gamma chain is believed to be important in regulating ATPase activity and the flow of protons through the CF(0) complex (By similarity)							EC 3.6.3.14	ATP synthase gamma chain	- none -	3.A.2	3.A.2			M00157,	F-type ATPase, prokaryotes and chloroplasts;	Structural complex;	Energy metabolism;	ATP synthesis;
fig|6666666.214148.peg.2079	MM4TEC2__C4_L=157425=	22676+1385					K02112	F-type H+-transporting ATPase subunit beta	EC:3.6.3.14	COG0055	C	Produces ATP from ADP in the presence of a proton gradient across the membrane. The catalytic sites are hosted primarily by the beta subunits (By similarity)	Type_0	Virulence	Type III secretion cytoplasmic ATP synthase (EC 3.6.3.14, YscN,SpaL,MxiB,HrcN,EscN)	T3SS	Secretion system|Type III secretion system	type III secretion system ATPase	EC 3.6.3.14	ATP synthase beta chain	- none -	3.A.2	3.A.2			M00157,	F-type ATPase, prokaryotes and chloroplasts;	Structural complex;	Energy metabolism;	ATP synthesis;
fig|6666666.214148.peg.208	MM4TEC2__C2_L=1925355=	172996+212																			- none -
fig|6666666.214148.peg.2080	MM4TEC2__C4_L=157425=	24070+410					K02114	F-type H+-transporting ATPase subunit epsilon		COG0355	C	Produces ATP from ADP in the presence of a proton gradient across the membrane (By similarity)							EC 3.6.3.14	ATP synthase epsilon chain	- none -	3.A.2	3.A.2			M00157,	F-type ATPase, prokaryotes and chloroplasts;	Structural complex;	Energy metabolism;	ATP synthesis;
fig|6666666.214148.peg.2081	MM4TEC2__C4_L=157425=	24487+113																			- none -
fig|6666666.214148.peg.2082	MM4TEC2__C4_L=157425=	24597+2225					K01681	aconitate hydratase	EC:4.2.1.3	COG1048	C	aconitate hydratase								Putative enzyme	- none -			MF0086,MF0088,MF0110,	TCA cycle;TCA cycle (Helicobacter pathway);glyoxylate bypass;	M00173,M00009,M00010,	Reductive citrate cycle (Arnon-Buchanan cycle);Citrate cycle (TCA cycle, Krebs cycle);Citrate cycle, first carbon oxidation, oxaloacetate => 2-oxoglutarate;	Pathway module;	Energy metabolism;	Carbon fixation Signature;
fig|6666666.214148.peg.2083	MM4TEC2__C4_L=157425=	26839+845								COG2110	S	appr-1-p processing domain protein								COG2110, Macro domain, possibly ADP-ribose binding module	- none -
fig|6666666.214148.peg.2084	MM4TEC2__C4_L=157425=	27846-134																			- none -
fig|6666666.214148.peg.2085	MM4TEC2__C4_L=157425=	27933+389								ENOG41121PF	S	iron-only hydrogenase system regulator									- none -
fig|6666666.214148.peg.2086	MM4TEC2__C4_L=157425=	28345+1001					K02051	NitT/TauT family transport system substrate-binding protein		COG0715	P	(ABC) transporter									- none -					M00188,	NitT/TauT family transport system;	Structural complex;	Environmental information processing;	Mineral and organic ion transport system;
fig|6666666.214148.peg.2087	MM4TEC2__C4_L=157425=	29366+761					K02050	NitT/TauT family transport system permease protein		ENOG410ZFR9	P	abc transporter permease protein									- none -	3.A.1	ABC			M00188,	NitT/TauT family transport system;	Structural complex;	Environmental information processing;	Mineral and organic ion transport system;
fig|6666666.214148.peg.2088	MM4TEC2__C4_L=157425=	30118+683				GT2	K02049	NitT/TauT family transport system ATP-binding protein		COG1116	P	(ABC) transporter	Maltosemaltodextrin_0	Virulence	Maltosemaltodextrin transport ATP-binding protein MalK (EC 3.6.3.19)						- none -	3.A.1	ABC			M00188,	NitT/TauT family transport system;	Structural complex;	Environmental information processing;	Mineral and organic ion transport system;
fig|6666666.214148.peg.2089	MM4TEC2__C4_L=157425=	30869+626								COG4905	S	Protein of unknown function (DUF1113)									- none -
fig|6666666.214148.peg.209	MM4TEC2__C2_L=1925355=	173211+275																			- none -
fig|6666666.214148.peg.2090	MM4TEC2__C4_L=157425=	31555+818					K07024	uncharacterized protein		COG0561	S	,hydrolase									- none -
fig|6666666.214148.peg.2091	MM4TEC2__C4_L=157425=	32392+566																		Large-conductance mechanosensitive channel	Potassium homeostasis
fig|6666666.214148.peg.2092	MM4TEC2__C4_L=157425=	33228-227																			- none -
fig|6666666.214148.peg.2093	MM4TEC2__C4_L=157425=	33624-293																			- none -
fig|6666666.214148.peg.2094	MM4TEC2__C4_L=157425=	33690+497					K01588	5-(carboxyamino)imidazole ribonucleotide mutase	EC:5.4.99.18	COG0041	F	Catalyzes the conversion of N5-carboxyaminoimidazole ribonucleotide (N5-CAIR) to 4-carboxy-5-aminoimidazole ribonucleotide (CAIR) (By similarity)							EC 5.4.99.18	N5-carboxyaminoimidazole ribonucleotide mutase	- none -
fig|6666666.214148.peg.2095	MM4TEC2__C4_L=157425=	34218+707					K01923	phosphoribosylaminoimidazole-succinocarboxamide synthase	EC:6.3.2.6	COG0152	F	SAICAR synthetase							EC 6.3.2.6	Phosphoribosylaminoimidazole-succinocarboxamide synthase	De Novo Purine Biosynthesis					M00048,	Inosine monophosphate biosynthesis, PRPP + glutamine => IMP;	Pathway module;	Nucleotide and amino acid metabolism;	Purine metabolism;
fig|6666666.214148.peg.2096	MM4TEC2__C4_L=157425=	34944+1427					K00764	amidophosphoribosyltransferase	EC:2.4.2.14	COG0034	F	glutamine phosphoribosylpyrophosphate amidotransferase							EC 2.4.2.14	Amidophosphoribosyltransferase	De Novo Purine Biosynthesis					M00048,	Inosine monophosphate biosynthesis, PRPP + glutamine => IMP;	Pathway module;	Nucleotide and amino acid metabolism;	Purine metabolism;
fig|6666666.214148.peg.2097	MM4TEC2__C4_L=157425=	36389+1025					K01933	phosphoribosylformylglycinamidine cyclo-ligase	EC:6.3.3.1	COG0150	F	phosphoribosylaminoimidazole synthetase							EC 6.3.3.1	Phosphoribosylformylglycinamidine cyclo-ligase	De Novo Purine Biosynthesis					M00048,	Inosine monophosphate biosynthesis, PRPP + glutamine => IMP;	Pathway module;	Nucleotide and amino acid metabolism;	Purine metabolism;
fig|6666666.214148.peg.2098	MM4TEC2__C4_L=157425=	37411+617					K11175	phosphoribosylglycinamide formyltransferase 1	EC:2.1.2.2	COG0299	F	phosphoribosylglycinamide formyltransferase							EC 2.1.2.2	Phosphoribosylglycinamide formyltransferase	5-FCL-like protein;De Novo Purine Biosynthesis					M00048,	Inosine monophosphate biosynthesis, PRPP + glutamine => IMP;	Pathway module;	Nucleotide and amino acid metabolism;	Purine metabolism;
fig|6666666.214148.peg.2099	MM4TEC2__C4_L=157425=	38034+722								ENOG410XP2Y	S	IMP cyclohydrolase-like protein								pfam07826: IMP cyclohydrolase-like protein (PurO-like)	- none -
fig|6666666.214148.peg.21	MM4TEC2__C1_L=46754=	14310+251																			- none -
fig|6666666.214148.peg.210	MM4TEC2__C2_L=1925355=	173492+173																			- none -
fig|6666666.214148.peg.2100	MM4TEC2__C4_L=157425=	38770+1184					K00602	phosphoribosylaminoimidazolecarboxamide formyltransferase / IMP cyclohydrolase [EC:2.1.2.3 3.5.4.10]		COG0138	F	bifunctional purine biosynthesis protein PURH							EC 3.5.4.10;EC 2.1.2.3	IMP cyclohydrolase / Phosphoribosylaminoimidazolecarboxamide formyltransferase	5-FCL-like protein;De Novo Purine Biosynthesis; <br>De Novo Purine Biosynthesis					M00048,	Inosine monophosphate biosynthesis, PRPP + glutamine => IMP;	Pathway module;	Nucleotide and amino acid metabolism;	Purine metabolism;
fig|6666666.214148.peg.2101	MM4TEC2__C4_L=157425=	39973+1286					K01945	phosphoribosylamine--glycine ligase	EC:6.3.4.13	COG0151	F	Phosphoribosylglycinamide synthetase	Phosphoribosylamine--glycine_0	Virulence	Phosphoribosylamine--glycine ligase (EC 6.3.4.13)				EC 6.3.4.13	Phosphoribosylamine--glycine ligase	De Novo Purine Biosynthesis					M00048,	Inosine monophosphate biosynthesis, PRPP + glutamine => IMP;	Pathway module;	Nucleotide and amino acid metabolism;	Purine metabolism;
fig|6666666.214148.peg.2102	MM4TEC2__C4_L=157425=	41270+3698					K01952	phosphoribosylformylglycinamidine synthase	EC:6.3.5.3	COG0047	F	phosphoribosylformylglycinamidine synthase	Phosphoribosylformylglycinamidine_0	Intracellular survival and replication	Phosphoribosylformylglycinamidine synthase, synthetase subunit (EC 6.3.5.3)				EC 6.3.5.3	Phosphoribosylformylglycinamidine synthase, synthetase subunit / Phosphoribosylformylglycinamidine synthase, glutamine amidotransferase subunit	De Novo Purine Biosynthesis;De Novo Purine Biosynthesis					M00048,	Inosine monophosphate biosynthesis, PRPP + glutamine => IMP;	Pathway module;	Nucleotide and amino acid metabolism;	Purine metabolism;
fig|6666666.214148.peg.2103	MM4TEC2__C4_L=157425=	45088+1841								COG0584	C	glycerophosphoryl diester phosphodiesterase									- none -
fig|6666666.214148.peg.2104	MM4TEC2__C4_L=157425=	47062+488					K07738	transcriptional repressor NrdR		COG1327	K	Negatively regulates transcription of bacterial ribonucleotide reductase nrd genes and operons by binding to NrdR- boxes (By similarity)								Ribonucleotide reductase transcriptional regulator NrdR	Ribonucleotide reduction
fig|6666666.214148.peg.2105	MM4TEC2__C4_L=157425=	47588+1040					K03526	(E)-4-hydroxy-3-methylbut-2-enyl-diphosphate synthase [EC:1.17.7.1 1.17.7.3]		COG0821	I	4-hydroxy-3-methylbut-2-en-1-yl diphosphate synthase activity							EC 1.17.7.1	1-hydroxy-2-methyl-2-(E)-butenyl 4-diphosphate synthase	CBSS-83331.1.peg.3039					M00096,	C5 isoprenoid biosynthesis, non-mevalonate pathway;	Pathway module;	Carbohydrate and lipid metabolism;	Terpenoid backbone biosynthesis;
fig|6666666.214148.peg.2106	MM4TEC2__C4_L=157425=	48638+1523					K03763	DNA polymerase III subunit alpha, Gram-positive type	EC:2.7.7.7												- none -
fig|6666666.214148.peg.2107	MM4TEC2__C4_L=157425=	50267+473					K09748	ribosome maturation factor RimP		COG0779	S	Required for maturation of 30S ribosomal subunits (By similarity)								Bacterial ribosome SSU maturation protein RimP	- none -
fig|6666666.214148.peg.2108	MM4TEC2__C4_L=157425=	50768+1139					K02600	N utilization substance protein A		COG0195	K	Transcription elongation factor NusA								Transcription termination protein NusA	NusA-TFII Cluster;Transcription factors bacterial
fig|6666666.214148.peg.2109	MM4TEC2__C4_L=157425=	51926+272					K07742	uncharacterized protein		COG2740	K	Nucleic-acid-binding protein implicated in transcription termination								COG2740: Predicted nucleic-acid-binding protein implicated in transcription termination	NusA-TFII Cluster;Transcription factors bacterial
fig|6666666.214148.peg.211	MM4TEC2__C2_L=1925355=	173669+221																			- none -
fig|6666666.214148.peg.2110	MM4TEC2__C4_L=157425=	52185+326																			- none -
fig|6666666.214148.peg.2111	MM4TEC2__C4_L=157425=	52516+2774					K02519	translation initiation factor IF-2		COG0532	J	One of the essential components for the initiation of protein synthesis. Protects formylmethionyl-tRNA from spontaneous hydrolysis and promotes its binding to the 30S ribosomal subunits. Also involved in the hydrolysis of GTP during the formation of the 70S ribosomal complex (By similarity)								Translation initiation factor 2	CBSS-138119.3.peg.2719;NusA-TFII Cluster; <br>Translation initiation factors bacterial
fig|6666666.214148.peg.2112	MM4TEC2__C4_L=157425=	55344+380					K02834	ribosome-binding factor A		COG0858	J	Associates with free 30S ribosomal subunits (but not with 30S subunits that are part of 70S ribosomes or polysomes). Essential for efficient processing of 16S rRNA. May interact with the 5'-terminal helix region of 16S rRNA (By similarity)								Ribosome-binding factor A	CBSS-138119.3.peg.2719;NusA-TFII Cluster; <br>Translation initiation factors bacterial
fig|6666666.214148.peg.2113	MM4TEC2__C4_L=157425=	55711+956					K06881	bifunctional oligoribonuclease and PAP phosphatase NrnA [EC:3.1.3.7 3.1.13.3]		COG0618	S	phosphoesterase RecJ domain protein								FIG146085: 3&#39;-to-5&#39; oligoribonuclease A, Bacillus type	CBSS-138119.3.peg.2719;RNA processing and degradation, bacterial
fig|6666666.214148.peg.2114	MM4TEC2__C4_L=157425=	56736+848					K03177	tRNA pseudouridine55 synthase	EC:5.4.99.25	COG0130	J	Responsible for synthesis of pseudouridine from uracil- 55 in the psi GC loop of transfer RNAs (By similarity)							EC 5.4.99.25	tRNA pseudouridine synthase B	- none -
fig|6666666.214148.peg.2115	MM4TEC2__C4_L=157425=	57578+887				GT2	K11753	riboflavin kinase / FMN adenylyltransferase [EC:2.7.1.26 2.7.7.2]		COG0196	H	riboflavin biosynthesis protein ribF							EC 2.7.7.2;EC 2.7.1.26	FMN adenylyltransferase / Riboflavin kinase	Riboflavin, FMN and FAD metabolism;Riboflavin, FMN and FAD metabolism; <br>riboflavin to FAD; <br>riboflavin to FAD
fig|6666666.214148.peg.2116	MM4TEC2__C4_L=157425=	58462+842					K01151	deoxyribonuclease IV	EC:3.1.21.2	COG0648	L	Endonuclease IV plays a role in DNA repair. It cleaves phosphodiester bonds at apurinic or apyrimidinic sites (AP sites) to produce new 5'-ends that are base-free deoxyribose 5-phosphate residues. It preferentially attacks modified AP sites created by bleomycin and neocarzinostatin (By similarity)							EC 3.1.21.2	Endonuclease IV	DNA repair, bacterial
fig|6666666.214148.peg.2117	MM4TEC2__C4_L=157425=	59357+1052					K01262	Xaa-Pro aminopeptidase	EC:3.4.11.9	COG0006	E	peptidase M24	Aminopeptidase_0	Intracellular survival and replication	Aminopeptidase YpdF (MP-, MA-, MS-, AP-, NP- specific)					Aminopeptidase YpdF (MP-, MA-, MS-, AP-, NP- specific)	Protein degradation
fig|6666666.214148.peg.2118	MM4TEC2__C4_L=157425=	60442+557					K02356	elongation factor P		COG0231	J	Involved in peptide bond synthesis. Stimulates efficient translation and peptide-bond synthesis on native or reconstituted 70S ribosomes in vitro. Probably functions indirectly by altering the affinity of the ribosome for aminoacyl-tRNA, thus increasing their reactivity as acceptors for peptidyl transferase (By similarity)								Translation elongation factor P	Translation elongation factors bacterial
fig|6666666.214148.peg.2119	MM4TEC2__C4_L=157425=	61068+443					K07560	D-tyrosyl-tRNA(Tyr) deacylase [EC:3.1.-.-]		COG1490	J	Hydrolyzes D-tyrosyl-tRNA(Tyr) into D-tyrosine and free tRNA(Tyr). Could be a defense mechanism against a harmful effect of D-tyrosine (By similarity)								D-tyrosyl-tRNA(Tyr) deacylase (EC 3.6.1.n1)	- none -
fig|6666666.214148.peg.212	MM4TEC2__C2_L=1925355=	173921+479																			- none -
fig|6666666.214148.peg.2120	MM4TEC2__C4_L=157425=	61515+833					K06167	phosphoribosyl 1,2-cyclic phosphate phosphodiesterase	EC:3.1.4.55	COG1235	S	domain protein									- none -
fig|6666666.214148.peg.2121	MM4TEC2__C4_L=157425=	62891-509								COG1670	J	#NAME?							EC 3.2.2.20;EC 6.3.5.2	Putative acetyltransferase / Putative acetyltransferase, GNAT family / DNA-3-methyladenine glycosylase / GMP synthase [glutamine-hydrolyzing]	DNA Repair Base Excision;Purine conversions
fig|6666666.214148.peg.2122	MM4TEC2__C4_L=157425=	63535-647																			- none -
fig|6666666.214148.peg.2123	MM4TEC2__C4_L=157425=	63673+1226					K19689	aminopeptidase [EC:3.4.11.-]		COG2309	E	aminopeptidase							EC 3.4.11.24	Aminopeptidase S (Leu, Val, Phe, Tyr preference)	Aminopeptidases (EC 3.4.11.-)
fig|6666666.214148.peg.2124	MM4TEC2__C4_L=157425=	64909+1226					K19689	aminopeptidase [EC:3.4.11.-]		COG2309	E	aminopeptidase							EC 3.4.11.24	Aminopeptidase S (Leu, Val, Phe, Tyr preference)	Aminopeptidases (EC 3.4.11.-)
fig|6666666.214148.peg.2125	MM4TEC2__C4_L=157425=	66214+695								ENOG4111H48	S	von Willebrand factor type A									- none -
fig|6666666.214148.peg.2126	MM4TEC2__C4_L=157425=	67015+446								ENOG410ZXDQ	S	acetyltransferase, (GNAT) family									- none -
fig|6666666.214148.peg.2127	MM4TEC2__C4_L=157425=	67472+1205								ENOG410ZVEU	G	Major Facilitator								N-Acetyl-D-glucosamine permease 2, possible	- none -
fig|6666666.214148.peg.2128	MM4TEC2__C4_L=157425=	68690+1349								COG0534	V	Mate efflux family protein								Multi antimicrobial extrusion protein (Na(+)/drug antiporter), MATE family of MDR efflux pumps	Multidrug Resistance Efflux Pumps	2.A.66	MOP
fig|6666666.214148.peg.2129	MM4TEC2__C4_L=157425=	70063+1115																			- none -
fig|6666666.214148.peg.213	MM4TEC2__C2_L=1925355=	174418+1124																			- none -
fig|6666666.214148.peg.2130	MM4TEC2__C4_L=157425=	71509-278								ENOG41121PC	S	NA									- none -
fig|6666666.214148.peg.2131	MM4TEC2__C4_L=157425=	72134-608								ENOG4111NM0	S	NA									- none -
fig|6666666.214148.peg.2132	MM4TEC2__C4_L=157425=	72396-224								ENOG411226D	S	PTS HPr component phosphorylation site									- none -
fig|6666666.214148.peg.2133	MM4TEC2__C4_L=157425=	72557+734																			- none -
fig|6666666.214148.peg.2134	MM4TEC2__C4_L=157425=	73288+530					K01515	ADP-ribose pyrophosphatase	EC:3.6.1.13	COG0494	L	Nudix hydrolase							EC 3.6.1.13	ADP-ribose pyrophosphatase	CBSS-216591.1.peg.168;NAD and NADP cofactor biosynthesis global; <br>Nudix proteins (nucleoside triphosphate hydrolases)
fig|6666666.214148.peg.2135	MM4TEC2__C4_L=157425=	74065-203																			- none -
fig|6666666.214148.peg.2136	MM4TEC2__C4_L=157425=	74399+653								ENOG410ZXDT	S	NA									- none -
fig|6666666.214148.peg.2137	MM4TEC2__C4_L=157425=	75077+779					K03525	type III pantothenate kinase	EC:2.7.1.33	COG1521	K	Catalyzes the phosphorylation of pantothenate (Pan), the first step in CoA biosynthesis (By similarity)							EC 2.7.1.33	Pantothenate kinase type III, CoaX-like	Coenzyme A Biosynthesis					M00120,	Coenzyme A biosynthesis, pantothenate => CoA;	Pathway module;	Nucleotide and amino acid metabolism;	Cofactor and vitamin biosynthesis;
fig|6666666.214148.peg.2138	MM4TEC2__C4_L=157425=	75853+1280					K00003	homoserine dehydrogenase	EC:1.1.1.3	COG0460	E	homoserine dehydrogenase							EC 1.1.1.3	Homoserine dehydrogenase	Threonine and Homoserine Biosynthesis
fig|6666666.214148.peg.2139	MM4TEC2__C4_L=157425=	77196+878					K05844	ribosomal protein S6--L-glutamate ligase [EC:6.3.2.-]		COG0189	HJ	Responsible for the addition of glutamate residues to the C-terminus of ribosomal protein S6 (By similarity)									- none -
fig|6666666.214148.peg.214	MM4TEC2__C2_L=1925355=	175560+1055																			- none -
fig|6666666.214148.peg.2140	MM4TEC2__C4_L=157425=	78188+422																			- none -
fig|6666666.214148.peg.2141	MM4TEC2__C4_L=157425=	78773+1991				GT4				COG0438	M	Glycosyl transferase (Group 1								Glycosyltransferase	- none -
fig|6666666.214148.peg.2142	MM4TEC2__C4_L=157425=	81822-1016			PlantCW,FungalCarbs	GH16	K03575	A/G-specific adenine glycosylase [EC:3.2.2.-]		COG1194	L	a g-specific adenine glycosylase								A/G-specific adenine glycosylase (EC 3.2.2.-)	DNA repair, bacterial
fig|6666666.214148.peg.2143	MM4TEC2__C4_L=157425=	81911+500					K00891	shikimate kinase	EC:2.7.1.71	COG0703	E	Catalyzes the specific phosphorylation of the 3-hydroxyl group of shikimic acid using ATP as a cosubstrate (By similarity)							EC 2.7.1.71	Shikimate kinase I	Chorismate Synthesis;Common Pathway For Synthesis of Aromatic Compounds (DAHP synthase to chorismate)					M00022,	Shikimate pathway, phosphoenolpyruvate + erythrose-4P => chorismate;	Pathway module;	Nucleotide and amino acid metabolism;	Aromatic amino acid metabolism;
fig|6666666.214148.peg.2144	MM4TEC2__C4_L=157425=	82570+209								COG1974	K	Represses a number of genes involved in the response to DNA damage (SOS response), including recA and lexA. In the presence of single-stranded DNA, RecA interacts with LexA causing an autocatalytic cleavage which disrupts the DNA-binding part of LexA, leading to derepression of the SOS regulon and eventually DNA repair (By similarity)									- none -
fig|6666666.214148.peg.2145	MM4TEC2__C4_L=157425=	82867+776					K06153	undecaprenyl-diphosphatase	EC:3.6.1.27	COG1968	V	Catalyzes the dephosphorylation of undecaprenyl diphosphate (UPP). Confers resistance to bacitracin (By similarity)	Undecaprenyl-diphosphatase_0	Acid resistance	Undecaprenyl-diphosphatase (EC 3.6.1.27)				EC 3.6.1.27	Undecaprenyl-diphosphatase	- none -
fig|6666666.214148.peg.2146	MM4TEC2__C4_L=157425=	83704+149																			- none -
fig|6666666.214148.peg.2147	MM4TEC2__C4_L=157425=	85010-1097				GH72	K06942	uncharacterized protein		COG0012	J	gtp-binding protein	GTP-binding_0	Virulence	GTP-binding and nucleic acid-binding protein YchF					GTP-binding and nucleic acid-binding protein YchF	- none -
fig|6666666.214148.peg.2148	MM4TEC2__C4_L=157425=	85158+1682					K01887	arginyl-tRNA synthetase	EC:6.1.1.19	COG0018	J	arginyL-tRNA synthetase							EC 6.1.1.19	Arginyl-tRNA synthetase	tRNA aminoacylation, Arg					M00359,M00360,	Aminoacyl-tRNA biosynthesis, eukaryotes;Aminoacyl-tRNA biosynthesis, prokaryotes;	Functional set;	Metabolism;	Aminoacyl tRNA;
fig|6666666.214148.peg.2149	MM4TEC2__C4_L=157425=	86854+647				GT2	K01091	phosphoglycolate phosphatase	EC:3.1.3.18	COG0546	S	had-superfamily hydrolase, subfamily ia, variant	Phosphoglycolate_0	Virulence|Intracellular survival and replication|Affect phagosome	Phosphoglycolate phosphatase (EC 3.1.3.18)						- none -
fig|6666666.214148.peg.215	MM4TEC2__C2_L=1925355=	176644+1109																			- none -
fig|6666666.214148.peg.2150	MM4TEC2__C4_L=157425=	88668-1130				GT4				COG0438	M	Glycosyl transferase (Group 1									- none -
fig|6666666.214148.peg.2151	MM4TEC2__C4_L=157425=	89266-584								COG1309	K	Transcriptional regulator									- none -
fig|6666666.214148.peg.2152	MM4TEC2__C4_L=157425=	90094-677								ENOG4111QIR	S	NA									- none -
fig|6666666.214148.peg.2153	MM4TEC2__C4_L=157425=	90125+737																			- none -
fig|6666666.214148.peg.2154	MM4TEC2__C4_L=157425=	90951+911								COG1597	I	diacylglycerol kinase									- none -
fig|6666666.214148.peg.2155	MM4TEC2__C4_L=157425=	92090+2435					K01971	bifunctional non-homologous end joining protein LigD	EC:6.5.1.1	COG3285	L	DNA ligase							EC 6.5.1.1	ATP-dependent DNA ligase clustered with Ku protein, LigD	Bacillus subtilis scratch - gjo;DNA Repair Base Excision; <br>DNA ligases; <br>Nonhomologous End-Joining in Bacteria
fig|6666666.214148.peg.2156	MM4TEC2__C4_L=157425=	94623+794								ENOG410YJ9I	S	NA									- none -
fig|6666666.214148.peg.2157	MM4TEC2__C4_L=157425=	95537+1535					K00965	UDPglucose--hexose-1-phosphate uridylyltransferase	EC:2.7.7.12	COG4468	G	UDP-glucose-hexose-1-phosphate uridylyltransferase							EC 2.7.7.10	Galactose-1-phosphate uridylyltransferase	Lactose and Galactose Uptake and Utilization			MF0056,	galactose degradation (Leloir pathway);	M00632,M00554,M00362,	Galactose degradation, Leloir pathway, galactose => alpha-D-glucose-1P;Nucleotide sugar biosynthesis, galactose => UDP-galactose;Nucleotide sugar biosynthesis, prokaryotes;	Pathway module;	Carbohydrate and lipid metabolism;	Other carbohydrate metabolism;
fig|6666666.214148.peg.2158	MM4TEC2__C4_L=157425=	97166+1514																			- none -
fig|6666666.214148.peg.2159	MM4TEC2__C4_L=157425=	98776+968					K03524	BirA family transcriptional regulator, biotin operon repressor / biotin-[acetyl-CoA-carboxylase] ligase	EC:6.3.4.15	COG1654	H	biotin-[acetyl-CoA-carboxylase] ligase activity							EC 6.3.4.9;EC 6.3.4.10;EC 6.3.4.11;EC 6.3.4.15	Biotin operon repressor / Biotin--protein ligase	Biotin biosynthesis
fig|6666666.214148.peg.216	MM4TEC2__C2_L=1925355=	177765+581																			- none -
fig|6666666.214148.peg.2160	MM4TEC2__C4_L=157425=	99754+572					K03523	biotin transport system substrate-specific component		COG1268	S	bioY protein								Substrate-specific component BioY of biotin ECF transporter	Biotin biosynthesis;ECF class transporters	2.A.88	2.A.88
fig|6666666.214148.peg.2161	MM4TEC2__C4_L=157425=	100958-635								COG0664	T	transcriptional regulator, crp fnr family									- none -
fig|6666666.214148.peg.2162	MM4TEC2__C4_L=157425=	101048+683								COG1145	C	4Fe-4S ferredoxin, iron-sulfur binding								Ferredoxin 3 fused to uncharacterized domain	- none -
fig|6666666.214148.peg.2163	MM4TEC2__C4_L=157425=	101933-155																			- none -
fig|6666666.214148.peg.2164	MM4TEC2__C4_L=157425=	101936+6923																			- none -
fig|6666666.214148.peg.2165	MM4TEC2__C4_L=157425=	108904+752				GT2	K01990	ABC-2 type transport system ATP-binding protein		COG1131	V	(ABC) transporter	ATP-dependent_0	Virulence	ATP-dependent efflux pump essential for phthiocerol dimycocerosates translocation, ATP-binding protein DrrA-like	PDIM	Cell wall	PROBABLE DAUNORUBICIN-DIM-TRANSPORT ATP-BINDING PROTEIN ABC TRANSPORTER DRRA			- none -	3.A.1	ABC			M00254,	ABC-2 type transport system;	Structural complex;	Environmental information processing;	ABC-2 type and other transport systems;
fig|6666666.214148.peg.2166	MM4TEC2__C4_L=157425=	109640+1685																			- none -
fig|6666666.214148.peg.2167	MM4TEC2__C4_L=157425=	111322+3098																			- none -
fig|6666666.214148.peg.2168	MM4TEC2__C4_L=157425=	114447+164																			- none -
fig|6666666.214148.peg.2169	MM4TEC2__C4_L=157425=	114635+860			BacterialCW	GH23	K02030	polar amino acid transport system substrate-binding protein		COG0834	E	(ABC) transporter									- none -	3.A.1	ABC			M00236,	Putative polar amino acid transport system;	Structural complex;	Environmental information processing;	Phosphate and amino acid transport system;
fig|6666666.214148.peg.217	MM4TEC2__C2_L=1925355=	178357+1508																			- none -
fig|6666666.214148.peg.2170	MM4TEC2__C4_L=157425=	115516+689					K02029	polar amino acid transport system permease protein		COG0765	E	amino acid AbC transporter								polar amino acid ABC transporter, inner membrane subunit	- none -	3.A.1	ABC			M00236,	Putative polar amino acid transport system;	Structural complex;	Environmental information processing;	Phosphate and amino acid transport system;
fig|6666666.214148.peg.2171	MM4TEC2__C4_L=157425=	116189+866				GT2	K02028	polar amino acid transport system ATP-binding protein	EC:3.6.3.21	COG1126	E	ABC transporter, (ATP-binding protein)	Glycine_0	Intracellular survival and replication	Glycine betaine ABC transport system, ATP-binding protein OpuAA (EC 3.6.3.32)	FbpABC	Iron uptake|ABC transporter	iron(III) ABC transporter, ATP-binding protein		Amino acid ABC transporter, ATP-binding protein	- none -	3.A.1	ABC			M00236,	Putative polar amino acid transport system;	Structural complex;	Environmental information processing;	Phosphate and amino acid transport system;
fig|6666666.214148.peg.2172	MM4TEC2__C4_L=157425=	117132+1955					K04041	fructose-1,6-bisphosphatase III	EC:3.1.3.11	COG3855	G	D-fructose-1,6-bisphosphate 1-phosphohydrolase class 3							EC 3.1.3.11	Fructose-1,6-bisphosphatase, Bacillus type	Glycolysis and Gluconeogenesis
fig|6666666.214148.peg.2173	MM4TEC2__C4_L=157425=	119228+866					K02030	polar amino acid transport system substrate-binding protein		COG0834	E	(ABC) transporter									- none -	3.A.1	ABC			M00236,	Putative polar amino acid transport system;	Structural complex;	Environmental information processing;	Phosphate and amino acid transport system;
fig|6666666.214148.peg.2174	MM4TEC2__C4_L=157425=	120112+650					K02029	polar amino acid transport system permease protein		COG0765	E	amino acid AbC transporter								ABC transporter membrane-spanning permease - glutamine transport	- none -	3.A.1	ABC			M00236,	Putative polar amino acid transport system;	Structural complex;	Environmental information processing;	Phosphate and amino acid transport system;
fig|6666666.214148.peg.2175	MM4TEC2__C4_L=157425=	120766+875				GT4	K02028	polar amino acid transport system ATP-binding protein	EC:3.6.3.21	COG1126	E	ABC transporter, (ATP-binding protein)	Glycine_0	Intracellular survival and replication	Glycine betaine ABC transport system, ATP-binding protein OpuAA (EC 3.6.3.32)	FbpABC	Iron uptake|ABC transporter	iron(III) ABC transporter, ATP-binding protein			- none -	3.A.1	ABC			M00236,	Putative polar amino acid transport system;	Structural complex;	Environmental information processing;	Phosphate and amino acid transport system;
fig|6666666.214148.peg.2176	MM4TEC2__C4_L=157425=	121638+281								COG4496	S	protein, YerC YecD									- none -
fig|6666666.214148.peg.2177	MM4TEC2__C4_L=157425=	121930+506								COG2110	S	appr-1-p processing domain protein									- none -
fig|6666666.214148.peg.2178	MM4TEC2__C4_L=157425=	123189-719								ENOG410YJ1H	S	lipolytic protein G-D-S-L family									- none -
fig|6666666.214148.peg.2179	MM4TEC2__C4_L=157425=	123438-128																			- none -
fig|6666666.214148.peg.218	MM4TEC2__C2_L=1925355=	180121+512																			- none -
fig|6666666.214148.peg.2180	MM4TEC2__C4_L=157425=	123492+599								ENOG410XUC3	K	Transcriptional regulator									- none -
fig|6666666.214148.peg.2181	MM4TEC2__C4_L=157425=	124147+1046					K01775	alanine racemase	EC:5.1.1.1	COG0787	M	Catalyzes the interconversion of L-alanine and D- alanine. May also act on other amino acids (By similarity)							EC 5.1.1.1	Alanine racemase	Alanine biosynthesis;Pyruvate Alanine Serine Interconversions			MF0017,	alanine degradation (racemase pathway);
fig|6666666.214148.peg.2182	MM4TEC2__C4_L=157425=	125196+533					K01934	5-formyltetrahydrofolate cyclo-ligase	EC:6.3.3.2	COG0212	H	5-formyltetrahydrofolate cyclo-ligase							EC 6.3.3.2	5-formyltetrahydrofolate cyclo-ligase	5-FCL-like protein;One-carbon metabolism by tetrahydropterines
fig|6666666.214148.peg.2183	MM4TEC2__C4_L=157425=	125737+590																			- none -
fig|6666666.214148.peg.2184	MM4TEC2__C4_L=157425=	126324+530								COG0742	L	Methyltransferase							EC 2.1.1.171	16S rRNA (guanine(966)-N(2))-methyltransferase	CBSS-266117.6.peg.1260;CBSS-269801.1.peg.1715; <br>RNA methylation
fig|6666666.214148.peg.2185	MM4TEC2__C4_L=157425=	126864+488					K00954	pantetheine-phosphate adenylyltransferase	EC:2.7.7.3	COG0669	H	Reversibly transfers an adenylyl group from ATP to 4'- phosphopantetheine, yielding dephospho-CoA (dPCoA) and pyrophosphate (By similarity)				LPS	Endotoxin	lipopolysaccharide core biosynthesis protein	EC 2.7.7.3	Phosphopantetheine adenylyltransferase	CBSS-266117.6.peg.1260;CBSS-269801.1.peg.1715; <br>Coenzyme A Biosynthesis					M00120,	Coenzyme A biosynthesis, pantothenate => CoA;	Pathway module;	Nucleotide and amino acid metabolism;	Cofactor and vitamin biosynthesis;
fig|6666666.214148.peg.2186	MM4TEC2__C4_L=157425=	127353+1022					K01626	3-deoxy-7-phosphoheptulonate synthase	EC:2.5.1.54	COG0722	E	Stereospecific condensation of phosphoenolpyruvate (PEP) and D-erythrose-4-phosphate (E4P) giving rise to 3-deoxy-D- arabino-heptulosonate-7-phosphate (DAHP) (By similarity)							EC 2.5.1.54	2-keto-3-deoxy-D-arabino-heptulosonate-7-phosphate synthase I alpha	Chorismate Synthesis;Common Pathway For Synthesis of Aromatic Compounds (DAHP synthase to chorismate)					M00022,	Shikimate pathway, phosphoenolpyruvate + erythrose-4P => chorismate;	Pathway module;	Nucleotide and amino acid metabolism;	Aromatic amino acid metabolism;
fig|6666666.214148.peg.2187	MM4TEC2__C4_L=157425=	128379+797					K04518	prephenate dehydratase	EC:4.2.1.51	COG0077	E	Prephenate dehydratase									- none -
fig|6666666.214148.peg.2188	MM4TEC2__C4_L=157425=	130153-983								COG3314	S	nucleoside recognition domain protein									- none -	9.A.5	9.A.5
fig|6666666.214148.peg.2189	MM4TEC2__C4_L=157425=	130185+791					K07001	NTE family protein		ENOG410YEF4	S	Patatin-like phospholipase									- none -
fig|6666666.214148.peg.219	MM4TEC2__C2_L=1925355=	180799+323																			- none -
fig|6666666.214148.peg.2190	MM4TEC2__C4_L=157425=	130984+1301					K07478	putative ATPase		COG2256	L	Recombination factor protein RarA									- none -
fig|6666666.214148.peg.2191	MM4TEC2__C4_L=157425=	132446+1553								COG1696	M	Membrane bOund o-acyl transferase mboat family protein				LOS	Adherence|Endotoxin	hypothetical protein		Probable poly(beta-D-mannuronate) O-acetylase (EC 2.3.1.-)	- none -	2.A.50	2.A.50
fig|6666666.214148.peg.2192	MM4TEC2__C4_L=157425=	134013+974								ENOG4111VIT	S	NA									- none -
fig|6666666.214148.peg.2193	MM4TEC2__C4_L=157425=	134984+1511				GT2				COG1020	Q	non-ribosomal peptide synthetase	D-alanine--poly(phosphoribitol)_0	Adhesion|No evidence of virulence	D-alanine--poly(phosphoribitol) ligase subunit 1 (EC 6.1.1.13)				EC 6.2.1.3	Long-chain-fatty-acid--CoA ligase	Biotin biosynthesis	4.C.1	4.C.1
fig|6666666.214148.peg.2194	MM4TEC2__C4_L=157425=	136492+1139					K01586	diaminopimelate decarboxylase	EC:4.1.1.20	COG0019	E	Specifically catalyzes the decarboxylation of meso- diaminopimelate (meso-DAP) to L-lysine (By similarity)							EC 4.1.1.20	Diaminopimelate decarboxylase	Lysine Biosynthesis DAP Pathway;Lysine Biosynthesis DAP Pathway, GJO scratch					M00526,M00016,M00527,	Lysine biosynthesis, DAP dehydrogenase pathway, aspartate => lysine;Lysine biosynthesis, succinyl-DAP pathway, aspartate => lysine;Lysine biosynthesis, DAP aminotransferase pathway, aspartate => lysine;	Pathway module;	Nucleotide and amino acid metabolism;	Lysine metabolism;
fig|6666666.214148.peg.2195	MM4TEC2__C4_L=157425=	137636+221								ENOG411228K	S	Phosphopantetheine attachment site. (EC 6.1.1.13)									- none -
fig|6666666.214148.peg.2196	MM4TEC2__C4_L=157425=	138381-485								ENOG4111IEN	S	NA									- none -
fig|6666666.214148.peg.2197	MM4TEC2__C4_L=157425=	139361-944					K00016	L-lactate dehydrogenase	EC:1.1.1.27	COG0039	C	Catalyzes the reversible oxidation of malate to oxaloacetate (By similarity)							EC 1.1.1.27	L-lactate dehydrogenase	Fermentations: Lactate;Fermentations: Mixed acid			MF0119,	lactate production;
fig|6666666.214148.peg.2198	MM4TEC2__C4_L=157425=	140021-605								COG1961	L	Resolvase				T3SS	Secretion system|Type III secretion system	putative DNA invertase			- none -	3.A.7	3.A.7
fig|6666666.214148.peg.2199	MM4TEC2__C4_L=157425=	140154+638					K01838	beta-phosphoglucomutase	EC:5.4.2.6	COG0637	S	HAD-superfamily hydrolase subfamily IA variant 3	Beta-phosphoglucomutase_0	Virulence	Beta-phosphoglucomutase (EC 5.4.2.6)				EC 5.4.2.6	Beta-phosphoglucomutase	Maltose and Maltodextrin Utilization;Trehalose Uptake and Utilization			MF0049,MF0056,	maltose degradation;galactose degradation (Leloir pathway);
fig|6666666.214148.peg.22	MM4TEC2__C1_L=46754=	15170+410																			- none -
fig|6666666.214148.peg.220	MM4TEC2__C2_L=1925355=	181198+194																			- none -
fig|6666666.214148.peg.2200	MM4TEC2__C4_L=157425=	140924+422								COG1959	K	Transcriptional regulator, BadM Rrf2 family									- none -
fig|6666666.214148.peg.2201	MM4TEC2__C4_L=157425=	141364+1358								COG1249	C	dihydrolipoyl dehydrogenase							EC 1.8.1.4;EC 1.16.1.1	Putative Dihydrolipoamide dehydrogenase ; Mercuric ion reductase ; PF00070 family, FAD-dependent NAD(P)-disulphide oxidoreductase	Mercuric reductase;Mercuric reductase; <br>Mercury resistance operon
fig|6666666.214148.peg.2202	MM4TEC2__C4_L=157425=	143723-968					K00845	glucokinase	EC:2.7.1.2	COG1940	G	ROK family	ROK_0	Cellular metabolism	ROK family sugar kinase or transcriptional regulator					transcriptional repressor/ROK family	- none -			MF0080,	Glycolysis (preparatory phase);	M00549,M00001,	Nucleotide sugar biosynthesis, glucose => UDP-glucose;Glycolysis (Embden-Meyerhof pathway), glucose => pyruvate;	Pathway module;	Carbohydrate and lipid metabolism;	Sugar metabolism;
fig|6666666.214148.peg.2203	MM4TEC2__C4_L=157425=	145041-818					K00868	pyridoxine kinase	EC:2.7.1.35	COG2240	H	Pyridoxal kinase							EC 2.7.1.35	Pyridoxal kinase	Pyridoxin (Vitamin B6) Biosynthesis
fig|6666666.214148.peg.2204	MM4TEC2__C4_L=157425=	145135+881					K07124	uncharacterized protein		COG0300	S	Dehydrogenase	Oxidoreductase,_0	Virulence	Oxidoreductase, short-chain dehydrogenasereductase family						- none -
fig|6666666.214148.peg.2205	MM4TEC2__C4_L=157425=	146029+1487					K00864	glycerol kinase	EC:2.7.1.30	COG0554	C	Key enzyme in the regulation of glycerol uptake and metabolism (By similarity)							EC 2.7.1.30	Glycerol kinase	Glycerol and Glycerol-3-phosphate Uptake and Utilization;Glycerolipid and Glycerophospholipid Metabolism in Bacteria			MF0109,	glycerol degradation (glycerol kinase pathway);
fig|6666666.214148.peg.2206	MM4TEC2__C4_L=157425=	147518+473																			- none -
fig|6666666.214148.peg.2207	MM4TEC2__C4_L=157425=	147988+830					K00560	thymidylate synthase	EC:2.1.1.45	COG0207	F	Provides the sole de novo source of dTMP for DNA biosynthesis (By similarity)							EC 2.1.1.45	Thymidylate synthase	pyrimidine conversions					M00053,	Pyrimidine deoxyribonuleotide biosynthesis, CDP/CTP => dCDP/dCTP,dTDP/dTTP;	Pathway module;	Nucleotide and amino acid metabolism;	Pyrimidine metabolism;
fig|6666666.214148.peg.2208	MM4TEC2__C4_L=157425=	148878+506					K00287	dihydrofolate reductase	EC:1.5.1.3	COG0262	H	dihydrofolate reductase activity							EC 1.5.1.3	Dihydrofolate reductase	5-FCL-like protein
fig|6666666.214148.peg.2209	MM4TEC2__C4_L=157425=	149437+671								ENOG4111ITI	T	response regulator	DNA-binding_0	Two-component system|Two-component system|Intracellular survival and replication|Modulate host immune response|Autophagy	DNA-binding response regulator PhoP					two-component response regulator	- none -
fig|6666666.214148.peg.221	MM4TEC2__C2_L=1925355=	181373+2273																			- none -
fig|6666666.214148.peg.2210	MM4TEC2__C4_L=157425=	150189+914				GT2	K01990	ABC-2 type transport system ATP-binding protein		COG1131	V	(ABC) transporter	Zinc_0	Zinc uptake	Zinc ABC transporter, ATP-binding protein ZnuC	PDIM	Cell wall	DrrA		ABC-type multidrug transport system, ATPase component	- none -	3.A.1	ABC			M00254,	ABC-2 type transport system;	Structural complex;	Environmental information processing;	ABC-2 type and other transport systems;
fig|6666666.214148.peg.2211	MM4TEC2__C4_L=157425=	151100+818								ENOG41127R8	S	NA									- none -
fig|6666666.214148.peg.2212	MM4TEC2__C4_L=157425=	151955+887				GT2	K00936			ENOG4111IN2	T	Histidine kinase									- none -
fig|6666666.214148.peg.2213	MM4TEC2__C4_L=157425=	153598-524					K01678	fumarate hydratase subunit beta	EC:4.2.1.2	COG1838	C	fumarate							EC 4.2.1.2;EC 4.2.1.32	Fumarate hydratase class I, aerobic ; L(+)-tartrate dehydratase beta subunit	Muconate lactonizing enzyme family			MF0086,MF0088,MF0127,	TCA cycle;TCA cycle (Helicobacter pathway);Succinate production;	M00173,M00009,	Reductive citrate cycle (Arnon-Buchanan cycle);Citrate cycle (TCA cycle, Krebs cycle);	Pathway module;	Energy metabolism;	Carbon fixation Signature;
fig|6666666.214148.peg.2214	MM4TEC2__C4_L=157425=	154496-839					K01677	fumarate hydratase subunit alpha	EC:4.2.1.2	COG1951	C	fumarate							EC 4.2.1.2;EC 4.2.1.32	Fumarate hydratase class I, aerobic ; L(+)-tartrate dehydratase alpha subunit	Muconate lactonizing enzyme family			MF0086,MF0088,MF0127,	TCA cycle;TCA cycle (Helicobacter pathway);Succinate production;	M00173,M00009,	Reductive citrate cycle (Arnon-Buchanan cycle);Citrate cycle (TCA cycle, Krebs cycle);	Pathway module;	Energy metabolism;	Carbon fixation Signature;
fig|6666666.214148.peg.2215	MM4TEC2__C4_L=157425=	154589+944					K07052	uncharacterized protein		COG1266	S	caax amino terminal protease family protein									- none -
fig|6666666.214148.peg.2216	MM4TEC2__C4_L=157425=	155533+437					K00783	23S rRNA (pseudouridine1915-N3)-methyltransferase	EC:2.1.1.177	COG1576	S	rRNA processing							EC 2.1.1.177	23S rRNA (pseudouridine(1915)-N(3))-methyltransferase	- none -
fig|6666666.214148.peg.2217	MM4TEC2__C4_L=157425=	156015+827					K01308	g-D-glutamyl-meso-diaminopimelate peptidase	EC:3.4.19.11	COG2866	E	metallocarboxypeptidase activity									- none -
fig|6666666.214148.peg.2218	MM4TEC2__C4_L=157425=	156827+461					K11991	tRNA(adenine34) deaminase	EC:3.5.4.33	COG0590	FJ	deaminase							EC 3.5.4.33	tRNA-specific adenosine-34 deaminase	- none -
fig|6666666.214148.peg.2219	MM4TEC2__C5_L=178675=	274-272																	EC 3.1.21.3	Type I restriction-modification system, specificity subunit S	Restriction-Modification System;Type I Restriction-Modification
fig|6666666.214148.peg.222	MM4TEC2__C2_L=1925355=	183654+1007								COG1032	C	radical SAM domain protein									- none -
fig|6666666.214148.peg.2220	MM4TEC2__C5_L=178675=	1782-1511					K03427	type I restriction enzyme M protein	EC:2.1.1.72	COG0286	V	type I restriction-modification system							EC 2.1.1.72	Type I restriction-modification system, DNA-methyltransferase subunit M	Restriction-Modification System;Type I Restriction-Modification
fig|6666666.214148.peg.2221	MM4TEC2__C5_L=178675=	4149-2363					K01153	type I restriction enzyme, R subunit	EC:3.1.21.3	COG4096	V	type I restriction-modification system R subunit							EC 3.1.21.3	Type I restriction-modification system, restriction subunit R	Restriction-Modification System;Type I Restriction-Modification	3.A.17	3.A.17
fig|6666666.214148.peg.2222	MM4TEC2__C5_L=178675=	5548-1340								ENOG4111VCY	S	NA									- none -
fig|6666666.214148.peg.2223	MM4TEC2__C5_L=178675=	7363-1802					K03471	ribonuclease HIII	EC:3.1.26.4	COG1039	L	Endonuclease that specifically degrades the RNA of RNA- DNA hybrids (By similarity)							EC 3.1.26.4	Ribonuclease HIII	Ribonuclease H;Ribonucleases in Bacillus
fig|6666666.214148.peg.2224	MM4TEC2__C5_L=178675=	8271-863								ENOG410ZJNZ	S	Nucleotidyl transferase of unknown function (DUF1814)									- none -
fig|6666666.214148.peg.2225	MM4TEC2__C5_L=178675=	8859-587								ENOG4111WD2	S	NA									- none -
fig|6666666.214148.peg.2226	MM4TEC2__C5_L=178675=	9473+275					K03530	DNA-binding protein HU-beta		COG0776	L	This protein is one of the two subunits of integration host factor, a specific DNA-binding protein that functions in genetic recombination as well as in transcriptional and translational control (By similarity)								Putative DNA-binding protein HU-beta (ACLAME 290)	- none -
fig|6666666.214148.peg.2227	MM4TEC2__C5_L=178675=	9886+740				GT2	K09013	Fe-S cluster assembly ATP-binding protein		COG0396	O	feS assembly ATPase SufC	Efflux_0	Virulence	Efflux transmembrane permease Rv1747 family => implicated in rifampicin, ofloxacin efflux	Shu	Iron uptake|Heme uptake	ATP-binding component of hemin transport system		Iron-sulfur cluster assembly ATPase protein SufC	- none -	3.A.1	ABC
fig|6666666.214148.peg.2228	MM4TEC2__C5_L=178675=	10610+917					K07033	uncharacterized protein		COG0719	O	Fe-S assembly protein								Iron-sulfur cluster assembly protein SufB	- none -
fig|6666666.214148.peg.2229	MM4TEC2__C5_L=178675=	12472-845					K04477	putative hydrolase		COG1387	E	histidinol phosphate phosphatase, hisj family									- none -
fig|6666666.214148.peg.223	MM4TEC2__C2_L=1925355=	184968+935																			- none -
fig|6666666.214148.peg.2230	MM4TEC2__C5_L=178675=	12545+2507					K00656	formate C-acetyltransferase	EC:2.3.1.54	COG1882	C	formate acetyltransferase	2-ketobutyrate_0	Virulence	2-ketobutyrate formate-lyase (EC 2.3.1.-) Pyruvate formate-lyase (EC 2.3.1.54)				EC 2.3.1.54	Pyruvate formate-lyase	Fermentations: Mixed acid			MF0001,MF0030,MF0085,	ethanol production (formate pathway);threonine degradation (formate pathway);pyruvate:formate lyase;
fig|6666666.214148.peg.2231	MM4TEC2__C5_L=178675=	15056+797					K04069	pyruvate formate lyase activating enzyme	EC:1.97.1.4	COG1180	O	activating enzyme	Pyruvate_0	Virulence	Pyruvate formate-lyase activating enzyme (EC 1.97.1.4)				EC 1.97.1.4	Pyruvate formate-lyase activating enzyme	Fermentations: Mixed acid
fig|6666666.214148.peg.2232	MM4TEC2__C5_L=178675=	15856+380					K04031	ethanolamine utilization protein EutS		COG4810	E	Utilization Protein								PduU-like protein clustered with pyruvate formate-lyase	- none -
fig|6666666.214148.peg.2233	MM4TEC2__C5_L=178675=	16238+464					K04029	ethanolamine utilization protein EutP		COG4917	E	ethanolamine utilization protein								Propanediol utilization protein PduV	- none -
fig|6666666.214148.peg.2234	MM4TEC2__C5_L=178675=	16821+806					K01628	L-fuculose-phosphate aldolase	EC:4.1.2.17	COG0235	G	Class II aldolase adducin								Ribulose-5-phosphate 4-epimerase and related epimerases and aldolases	- none -			MF0124,	Fucose degradation;
fig|6666666.214148.peg.2235	MM4TEC2__C5_L=178675=	17632+512								COG3193	S	Glcg protein									- none -
fig|6666666.214148.peg.2236	MM4TEC2__C5_L=178675=	18138+1385					K13922	propionaldehyde dehydrogenase	EC:1.2.1.87	COG1012	C	Dehydrogenase								CoA-acylating propionaldehyde dehydrogenase	- none -
fig|6666666.214148.peg.2237	MM4TEC2__C5_L=178675=	19539+1214				GH135				COG1063	E	Dehydrogenase	Alcohol_0	Virulence	Alcohol dehydrogenase (EC 1.1.1.1)				EC 1.1.1.103	L-threonine 3-dehydrogenase	Glycine Biosynthesis;Threonine degradation
fig|6666666.214148.peg.2238	MM4TEC2__C5_L=178675=	20767+314								ENOG4111W9K	S	BMC domain								EutM/PduA/PduJ-like protein 2 clustered with pyruvate formate-lyase	- none -
fig|6666666.214148.peg.2239	MM4TEC2__C5_L=178675=	21124+275								COG4577	E	Microcompartments protein								EutM/PduA/PduJ-like protein 2 clustered with pyruvate formate-lyase	- none -
fig|6666666.214148.peg.224	MM4TEC2__C2_L=1925355=	186919-695								ENOG410XQW1	S	NA									- none -
fig|6666666.214148.peg.2240	MM4TEC2__C5_L=178675=	21424+323								ENOG4111WYU	E	Carbon dioxide concentrating mechanism carboxysome shell protein								PduJ-like protein clustered with pyruvate formate-lyase	- none -
fig|6666666.214148.peg.2241	MM4TEC2__C5_L=178675=	21820+281								COG4577	E	Microcompartments protein								EutM/PduA/PduJ-like protein 2 clustered with pyruvate formate-lyase	- none -
fig|6666666.214148.peg.2242	MM4TEC2__C5_L=178675=	22281+641					K15024	putative phosphotransacetylase	EC:2.3.1.8	COG4869	Q	Involved in 1,2-propanediol (1,2-PD) degradation by catalyzing the conversion of propanoyl-CoA to propanoyl-phosphate (By similarity)								PduL-like protein clustered with pyruvate formate-lyase	- none -					M00579,	Phosphate acetyltransferase-acetate kinase pathway, acetyl-CoA => acetate;	Pathway module;	Energy metabolism;	Carbon fixation Signature;
fig|6666666.214148.peg.2243	MM4TEC2__C5_L=178675=	22940+263					K04028	ethanolamine utilization protein EutN		COG4576	E	ethanolamine catabolic process								EutN-like protein clustered with pyruvate formate-lyase	- none -
fig|6666666.214148.peg.2244	MM4TEC2__C5_L=178675=	23210+1337								COG4656	C	Required for nitrogen fixation. May be part of a membrane complex functioning as an intermediate in the electron transport to nitrogenase (By similarity)								Cob(III)alamin reductase @ Cob(II)alamin reductase	- none -	3.D.6	UT/RnfD/NqrB
fig|6666666.214148.peg.2245	MM4TEC2__C5_L=178675=	24544+548								COG4577	E	Microcompartments protein								PduT-like protein clustered with pyruvate formate-lyase	- none -
fig|6666666.214148.peg.2246	MM4TEC2__C5_L=178675=	25186+776								COG1349	K	transcriptional regulator DeoR family								Transcriptional repressor of the fructose operon, DeoR family	- none -
fig|6666666.214148.peg.2247	MM4TEC2__C5_L=178675=	25959+785					K03496	chromosome partitioning protein		COG1192	D	cobyrinic Acid a,c-diamide synthase				Polar flagella	Motility|Colonization	SOJ-like and chromosome partitioning protein		Chromosome (plasmid) partitioning protein ParA	Bacterial Cytoskeleton;RNA modification and chromosome partitioning cluster	3.A.7	3.A.7
fig|6666666.214148.peg.2248	MM4TEC2__C5_L=178675=	26735+470																			- none -
fig|6666666.214148.peg.2249	MM4TEC2__C5_L=178675=	27222+1145								COG1454	C	alcohol dehydrogenase								Putative iron-containing NADPH-dependent propanol dehydrogenase	- none -
fig|6666666.214148.peg.225	MM4TEC2__C2_L=1925355=	187112+995								COG2801	L	Retrotransposon protein								Mobile element protein	- none -
fig|6666666.214148.peg.2250	MM4TEC2__C5_L=178675=	28393+1457					K00848	rhamnulokinase	EC:2.7.1.5	COG1070	G	Carbohydrate kinase							EC 2.7.1.5	Rhamnulokinase	- none -			MF0059,	rhamnose degradation;
fig|6666666.214148.peg.2251	MM4TEC2__C5_L=178675=	30798-866								ENOG4111AZ4	K	Transcriptional regulator, ARAC family									- none -
fig|6666666.214148.peg.2252	MM4TEC2__C5_L=178675=	30949+1526				GT2	K10441	ribose transport system ATP-binding protein	EC:3.6.3.17	COG1129	P	(ABC) transporter	Galactosemethyl_0	Virulence	Galactosemethyl galactoside ABC transport system, ATP-binding protein MglA (EC 3.6.3.17)	FbpABC	Iron uptake|ABC transporter	iron(III) ABC transporter, ATP-binding protein		Ribose ABC transport system, ATP-binding protein RbsA (TC 3.A.1.2.1)	D-ribose utilization	3.A.1	ABC			M00212,	Ribose transport system;	Structural complex;	Environmental information processing;	Saccharide, polyol, and lipid transport system;
fig|6666666.214148.peg.2253	MM4TEC2__C5_L=178675=	32456+1355					K10440	ribose transport system permease protein		COG1172	G	(ABC) transporter									- none -	3.A.1	ABC			M00212,	Ribose transport system;	Structural complex;	Environmental information processing;	Saccharide, polyol, and lipid transport system;
fig|6666666.214148.peg.2254	MM4TEC2__C5_L=178675=	33853+1049					K10439	ribose transport system substrate-binding protein		COG1879	G	Periplasmic binding protein LacI transcriptional regulator									- none -					M00212,	Ribose transport system;	Structural complex;	Environmental information processing;	Saccharide, polyol, and lipid transport system;
fig|6666666.214148.peg.2255	MM4TEC2__C5_L=178675=	35011+425					K02431	L-fucose mutarotase	EC:5.1.3.29	COG4154	G	RbsD or FucU transport							EC 5.1.3.29	L-fucose mutarotase	- none -
fig|6666666.214148.peg.2256	MM4TEC2__C5_L=178675=	35438+1772					K01818	L-fucose isomerase	EC:5.3.1.25	COG2407	G	Converts the aldose L-fucose into the corresponding ketose L-fuculose (By similarity)							EC 5.3.1.25;EC 5.3.1.3	L-fucose isomerase @ D-Arabinose ketol-isomerase	- none -			MF0124,	Fucose degradation;
fig|6666666.214148.peg.2257	MM4TEC2__C5_L=178675=	37332+779					K07238	zinc transporter, ZIP family		COG0428	P	zinc transporter								Metal transporter, ZIP family	- none -	2.A.5	2.A.5
fig|6666666.214148.peg.2258	MM4TEC2__C5_L=178675=	38153+881								COG1028	S	Dehydrogenase reductase	Oxidoreductase,_0	Virulence	Oxidoreductase, short-chain dehydrogenasereductase family						- none -
fig|6666666.214148.peg.2259	MM4TEC2__C5_L=178675=	41528-2426					K01869	leucyl-tRNA synthetase	EC:6.1.1.4	COG0495	J	Leucyl-trna synthetase							EC 6.1.1.4	Leucyl-tRNA synthetase	tRNA aminoacylation, Leu					M00359,M00360,	Aminoacyl-tRNA biosynthesis, eukaryotes;Aminoacyl-tRNA biosynthesis, prokaryotes;	Functional set;	Metabolism;	Aminoacyl tRNA;
fig|6666666.214148.peg.226	MM4TEC2__C2_L=1925355=	189017-644					K02120	V/A-type H+-transporting ATPase subunit D		COG1394	C	Produces ATP from ADP in the presence of a proton gradient across the membrane (By similarity)							EC 3.6.3.14	V-type ATP synthase subunit D	- none -	3.A.2	3.A.2			M00159,	V/A-type ATPase, prokaryotes;	Structural complex;	Energy metabolism;	ATP synthesis;
fig|6666666.214148.peg.2260	MM4TEC2__C5_L=178675=	41787-224																		Outer membrane protein assembly factor YaeT precursor	- none -
fig|6666666.214148.peg.2261	MM4TEC2__C5_L=178675=	41913+719																			- none -
fig|6666666.214148.peg.2262	MM4TEC2__C5_L=178675=	42861-131																			- none -
fig|6666666.214148.peg.2263	MM4TEC2__C5_L=178675=	42944+1907			PlantCW	GH28	K01868	threonyl-tRNA synthetase	EC:6.1.1.3	COG0441	J	threonine-tRNA ligase activity							EC 6.1.1.3	Threonyl-tRNA synthetase	tRNA aminoacylation, Thr					M00359,M00360,	Aminoacyl-tRNA biosynthesis, eukaryotes;Aminoacyl-tRNA biosynthesis, prokaryotes;	Functional set;	Metabolism;	Aminoacyl tRNA;
fig|6666666.214148.peg.2264	MM4TEC2__C5_L=178675=	45195+383					K02520	translation initiation factor IF-3		COG0290	J	IF-3 binds to the 30S ribosomal subunit and shifts the equilibrum between 70S ribosomes and their 50S and 30S subunits in favor of the free subunits, thus enhancing the availability of 30S subunits on which protein synthesis initiation begins (By similarity)								Translation initiation factor 3	Mycobacterium virulence operon involved in protein synthesis (LSU ribosomal proteins);Translation initiation factors bacterial
fig|6666666.214148.peg.2265	MM4TEC2__C5_L=178675=	45653+200					K02916	large subunit ribosomal protein L35		COG0291	J	50s ribosomal protein L35								LSU ribosomal protein L35p	Mycobacterium virulence operon involved in protein synthesis (LSU ribosomal proteins);Ribosome LSU bacterial					M00178,	Ribosome, bacteria;	Structural complex;	Genetic information processing;	Ribosome;
fig|6666666.214148.peg.2266	MM4TEC2__C5_L=178675=	45872+353					K02887	large subunit ribosomal protein L20		COG0292	J	Binds directly to 23S ribosomal RNA and is necessary for the in vitro assembly process of the 50S ribosomal subunit. It is not involved in the protein synthesizing functions of that subunit (By similarity)								LSU ribosomal protein L20p	Mycobacterium virulence operon involved in protein synthesis (LSU ribosomal proteins);Ribosome LSU bacterial					M00178,	Ribosome, bacteria;	Structural complex;	Genetic information processing;	Ribosome;
fig|6666666.214148.peg.2267	MM4TEC2__C5_L=178675=	46264+752					K03437	RNA methyltransferase, TrmH family		COG0566	J	Methyltransferase									- none -
fig|6666666.214148.peg.2268	MM4TEC2__C5_L=178675=	47032+740								COG0217	K	transcriptional regulatory protein								Probable transcriptional regulatory protein YebC	- none -
fig|6666666.214148.peg.2269	MM4TEC2__C5_L=178675=	47831+1235					K00147	glutamate-5-semialdehyde dehydrogenase	EC:1.2.1.41	COG0014	E	Catalyzes the NADPH dependent reduction of L-gamma- glutamyl 5-phosphate into L-glutamate 5-semialdehyde and phosphate. The product spontaneously undergoes cyclization to form 1-pyrroline-5-carboxylate (By similarity)							EC 1.2.1.41	Gamma-glutamyl phosphate reductase	Proline Synthesis					M00015,	Proline biosynthesis, glutamate => proline;	Pathway module;	Nucleotide and amino acid metabolism;	Arginine and proline metabolism;
fig|6666666.214148.peg.227	MM4TEC2__C2_L=1925355=	190392-1370					K02118	V/A-type H+-transporting ATPase subunit B		COG1156	C	Produces ATP from ADP in the presence of a proton gradient across the membrane. The V-type beta chain is a regulatory subunit (By similarity)	Type_0	Type III secretion	Type III secretion cytoplasmic ATP synthase (EC 3.6.3.14, YscN,SpaL,MxiB,HrcN,EscN)	Flagella	Secretion system|Invasion|Motility	flagellum-specific ATP synthase	EC 3.6.3.14	V-type ATP synthase subunit B	- none -	3.A.2	3.A.2			M00159,	V/A-type ATPase, prokaryotes;	Structural complex;	Energy metabolism;	ATP synthesis;
fig|6666666.214148.peg.2270	MM4TEC2__C5_L=178675=	49258-128																			- none -
fig|6666666.214148.peg.2271	MM4TEC2__C5_L=178675=	49382+494																			- none -
fig|6666666.214148.peg.2272	MM4TEC2__C5_L=178675=	49869+1112					K02238	competence protein ComEC		COG2333	S	DNA internalization-related competence protein ComEC Rec2								Late competence protein ComEC, DNA transport	- none -	3.A.11	3.A.11
fig|6666666.214148.peg.2273	MM4TEC2__C5_L=178675=	51109+1826					K06207	GTP-binding protein		COG1217	T	gtp-binding protein typa								GTP-binding protein TypA/BipA	- none -
fig|6666666.214148.peg.2274	MM4TEC2__C5_L=178675=	52986+254																			- none -
fig|6666666.214148.peg.2275	MM4TEC2__C5_L=178675=	53240+371																			- none -
fig|6666666.214148.peg.2276	MM4TEC2__C5_L=178675=	53592+272																			- none -
fig|6666666.214148.peg.2277	MM4TEC2__C5_L=178675=	53878+866					K01524	exopolyphosphatase / guanosine-5'-triphosphate,3'-diphosphate pyrophosphatase [EC:3.6.1.11 3.6.1.40]		COG0248	FP	ppx gppa phosphatase	Exopolyphosphatase_0	Virulence	Exopolyphosphatase (EC 3.6.1.11)				EC 3.6.1.11	Exopolyphosphatase	Phosphate metabolism;Polyphosphate
fig|6666666.214148.peg.2278	MM4TEC2__C5_L=178675=	54741+1109																			- none -
fig|6666666.214148.peg.2279	MM4TEC2__C5_L=178675=	56129-239																			- none -
fig|6666666.214148.peg.228	MM4TEC2__C2_L=1925355=	192145-1760					K02117	V/A-type H+-transporting ATPase subunit A	EC:3.6.3.14	COG1155	C	Produces ATP from ADP in the presence of a proton gradient across the membrane. The V-type alpha chain is a catalytic subunit (By similarity)	Type_0	Type III secretion	Type III secretion cytoplasmic ATP synthase (EC 3.6.3.14, YscN,SpaL,MxiB,HrcN,EscN)				EC 3.6.3.14	V-type ATP synthase subunit A	- none -	3.A.2	3.A.2			M00159,	V/A-type ATPase, prokaryotes;	Structural complex;	Energy metabolism;	ATP synthesis;
fig|6666666.214148.peg.2280	MM4TEC2__C5_L=178675=	56319+1907					K02470	DNA gyrase subunit B	EC:5.99.1.3	COG0187	L	DNA gyrase negatively supercoils closed circular double- stranded DNA in an ATP-dependent manner and also catalyzes the interconversion of other topological isomers of double-stranded DNA rings, including catenanes and knotted rings (By similarity)							EC 5.99.1.3	DNA gyrase subunit B	DNA gyrase subunits;DNA topoisomerases, Type II, ATP-dependent; <br>Resistance to fluoroquinolones
fig|6666666.214148.peg.2281	MM4TEC2__C5_L=178675=	58238+2552					K02469	DNA gyrase subunit A	EC:5.99.1.3	COG0188	L	DNA gyrase negatively supercoils closed circular double- stranded DNA in an ATP-dependent manner and also catalyzes the interconversion of other topological isomers of double-stranded DNA rings, including catenanes and knotted rings (By similarity)							EC 5.99.1.3	DNA gyrase subunit A	DNA gyrase subunits;DNA topoisomerases, Type II, ATP-dependent; <br>Resistance to fluoroquinolones
fig|6666666.214148.peg.2282	MM4TEC2__C5_L=178675=	63623-2789					K12952	cation-transporting ATPase E [EC:3.6.3.-]		COG0474	P	P-type atpase							EC 3.6.3.3;EC 3.6.3.5;EC 3.6.3.4	Lead, cadmium, zinc and mercury transporting ATPase ; Copper-translocating P-type ATPase	Copper Transport System;Copper homeostasis	3.A.3	P-ATPase
fig|6666666.214148.peg.2283	MM4TEC2__C5_L=178675=	63826+1286			PlantCW,AnimalCarb	GH1	K01875	seryl-tRNA synthetase	EC:6.1.1.11	COG0172	J	Catalyzes the attachment of serine to tRNA(Ser). Is also able to aminoacylate tRNA(Sec) with serine, to form the misacylated tRNA L-seryl-tRNA(Sec), which will be further converted into selenocysteinyl-tRNA(Sec) (By similarity)							EC 6.1.1.11	Seryl-tRNA synthetase	tRNA aminoacylation, Ser					M00359,M00360,	Aminoacyl-tRNA biosynthesis, eukaryotes;Aminoacyl-tRNA biosynthesis, prokaryotes;	Functional set;	Metabolism;	Aminoacyl tRNA;
fig|6666666.214148.peg.2284	MM4TEC2__C5_L=178675=	65164+1073				GT2	K07646	two-component system, OmpR family, sensor histidine kinase KdpD	EC:2.7.13.3	COG2205	T	Histidine kinase	Two-component_0	Two-component system|Two-component system|Intracellular survival and replication	Two-component system phosphate sensor kinase, PhoR					Osmosensitive K+ channel histidine kinase KdpD (EC 2.7.3.-)	Potassium homeostasis					M00454,	KdpD-KdpE (potassium transport) two-component regulatory system;	Functional set;	Environmental information processing;	Two-component regulatory system;
fig|6666666.214148.peg.2285	MM4TEC2__C5_L=178675=	66230+683				GT2	K07667	two-component system, OmpR family, KDP operon response regulator KdpE		COG0745	T	regulatoR								sensor histidine kinase	- none -					M00454,	KdpD-KdpE (potassium transport) two-component regulatory system;	Functional set;	Environmental information processing;	Two-component regulatory system;
fig|6666666.214148.peg.2286	MM4TEC2__C5_L=178675=	66924+1022					K01714	4-hydroxy-tetrahydrodipicolinate synthase	EC:4.3.3.7	COG0329	E	Catalyzes the condensation of (S)-aspartate-beta- semialdehyde (S)-ASA and pyruvate to 4-hydroxy- tetrahydrodipicolinate (HTPA) (By similarity)							EC 4.3.3.7	4-hydroxy-tetrahydrodipicolinate synthase	Lysine Biosynthesis DAP Pathway;Lysine Biosynthesis DAP Pathway, GJO scratch					M00526,M00016,M00527,	Lysine biosynthesis, DAP dehydrogenase pathway, aspartate => lysine;Lysine biosynthesis, succinyl-DAP pathway, aspartate => lysine;Lysine biosynthesis, DAP aminotransferase pathway, aspartate => lysine;	Pathway module;	Nucleotide and amino acid metabolism;	Lysine metabolism;
fig|6666666.214148.peg.2287	MM4TEC2__C5_L=178675=	67943+1337					K00928	aspartate kinase	EC:2.7.2.4	COG0527	E	Aspartokinase	Aspartokinase_0	Intracellular survival and replication	Aspartokinase (EC 2.7.2.4)				EC 2.7.2.4	Aspartokinase	CBSS-216591.1.peg.168;Lysine Biosynthesis DAP Pathway; <br>Lysine Biosynthesis DAP Pathway, GJO scratch; <br>Threonine and Homoserine Biosynthesis
fig|6666666.214148.peg.2288	MM4TEC2__C5_L=178675=	69368+323																			- none -
fig|6666666.214148.peg.2289	MM4TEC2__C5_L=178675=	69698+89																			- none -
fig|6666666.214148.peg.229	MM4TEC2__C2_L=1925355=	192477-335					K02122	V/A-type H+-transporting ATPase subunit F		COG1436	C	Subunit of the peripheral V1 complex of vacuolar ATPase essential for assembly or catalytic function. V-ATPase is responsible for acidifying a variety of intracellular compartments in eukaryotic cells (By similarity)									- none -	3.A.2	3.A.2			M00159,	V/A-type ATPase, prokaryotes;	Structural complex;	Energy metabolism;	ATP synthesis;
fig|6666666.214148.peg.2290	MM4TEC2__C5_L=178675=	69814+1685					K01546	K+-transporting ATPase ATPase A chain	EC:3.6.3.12	COG2060	P	One of the components of the high-affinity ATP-driven potassium transport (or KDP) system, which catalyzes the hydrolysis of ATP coupled with the exchange of hydrogen and potassium ions (By similarity)							EC 3.6.3.12	Potassium-transporting ATPase A chain (TC 3.A.3.7.1)	Potassium homeostasis	3.A.3	P-ATPase
fig|6666666.214148.peg.2291	MM4TEC2__C5_L=178675=	71512+2075					K01547	K+-transporting ATPase ATPase B chain	EC:3.6.3.12	COG2216	P	One of the components of the high-affinity ATP-driven potassium transport (or KDP) system, which catalyzes the hydrolysis of ATP coupled with the exchange of hydrogen and potassium ions (By similarity)	Lead,_0	Virulence	Lead, cadmium, zinc and mercury transporting ATPase (EC 3.6.3.3) (EC 3.6.3.5)| Copper-translocating P-type ATPase (EC 3.6.3.4)				EC 3.6.3.12	Potassium-transporting ATPase B chain (TC 3.A.3.7.1)	Potassium homeostasis	3.A.3	P-ATPase
fig|6666666.214148.peg.2292	MM4TEC2__C5_L=178675=	73600+644					K01548	K+-transporting ATPase ATPase C chain	EC:3.6.3.12	COG2156	P	One of the components of the high-affinity ATP-driven potassium transport (or KDP) system, which catalyzes the hydrolysis of ATP coupled with the exchange of hydrogen and potassium ions. The C subunit may be involved in assembly of the KDP complex (By similarity)							EC 3.6.3.12	Potassium-transporting ATPase C chain (TC 3.A.3.7.1)	Potassium homeostasis	3.A.3	P-ATPase
fig|6666666.214148.peg.2293	MM4TEC2__C5_L=178675=	74241+1526					K07646	two-component system, OmpR family, sensor histidine kinase KdpD	EC:2.7.13.3	COG2205	T	Histidine kinase	Osmosensitive_0	Virulence	Osmosensitive K+ channel histidine kinase KdpD					Osmosensitive K+ channel histidine kinase KdpD (EC 2.7.3.-)	Potassium homeostasis					M00454,	KdpD-KdpE (potassium transport) two-component regulatory system;	Functional set;	Environmental information processing;	Two-component regulatory system;
fig|6666666.214148.peg.2294	MM4TEC2__C5_L=178675=	75889+1118					K07079	uncharacterized protein		COG1453	C	Aldo keto reductase								Fe-S oxidoreductase	- none -
fig|6666666.214148.peg.2295	MM4TEC2__C5_L=178675=	77019+584								ENOG4111QB7	S	NA									- none -
fig|6666666.214148.peg.2296	MM4TEC2__C5_L=178675=	77596+410								ENOG41123Z7	S	Pfam:DUF1893									- none -
fig|6666666.214148.peg.2297	MM4TEC2__C5_L=178675=	78337+890								COG3177	S	Filamentation induced by cAMP protein fic								Uncharacterized protein PRU_2521	- none -
fig|6666666.214148.peg.2298	MM4TEC2__C5_L=178675=	79245+2339					K03657	DNA helicase II / ATP-dependent DNA helicase PcrA	EC:3.6.4.12	COG0210	L	helicase	ATP-dependent_0	Intracellular survival and replication	ATP-dependent DNA helicase UvrDPcrA (EC 3.6.4.12)					ATP-dependent DNA helicase UvrD/PcrA	DNA repair, bacterial UvrD and related helicases
fig|6666666.214148.peg.2299	MM4TEC2__C5_L=178675=	81829+1031																			- none -
fig|6666666.214148.peg.23	MM4TEC2__C1_L=46754=	15763+140																			- none -
fig|6666666.214148.peg.230	MM4TEC2__C2_L=1925355=	193447-980					K02119	V/A-type H+-transporting ATPase subunit C		COG1527	C	ATP synthase, subunit									- none -					M00159,	V/A-type ATPase, prokaryotes;	Structural complex;	Energy metabolism;	ATP synthesis;
fig|6666666.214148.peg.2300	MM4TEC2__C5_L=178675=	83364+1778			AlpGlucans	GH13															- none -
fig|6666666.214148.peg.2301	MM4TEC2__C5_L=178675=	85261+1385								COG4799	I	carboxylase	Methylcrotonyl-CoA_0	Virulence	Methylcrotonyl-CoA carboxylase carboxyl transferase subunit (EC 6.4.1.4)						- none -	3.B.1	CPA
fig|6666666.214148.peg.2302	MM4TEC2__C5_L=178675=	86657+338																			- none -
fig|6666666.214148.peg.2303	MM4TEC2__C5_L=178675=	87008+359					K01960	pyruvate carboxylase subunit B	EC:6.4.1.1	COG0511	I	Acetyl-CoA carboxylase, biotin carboxyl carrier protein									- none -
fig|6666666.214148.peg.2304	MM4TEC2__C5_L=178675=	87380+1193					K01572	oxaloacetate decarboxylase, beta subunit	EC:4.1.1.3	COG1883	C	decarboxylase beta subunit							EC 4.1.1.3	Oxaloacetate decarboxylase beta chain	Na+ translocating decarboxylases and related biotin-dependent enzymes;Pyruvate metabolism I: anaplerotic reactions, PEP	3.B.1	CPA
fig|6666666.214148.peg.2305	MM4TEC2__C5_L=178675=	88632+1418					K01571	oxaloacetate decarboxylase, alpha subunit	EC:4.1.1.3	COG5016	C	Oxaloacetate decarboxylase	Pyruvate_0	Intracellular survival and replication|Cellular metabolism	Pyruvate carboxylase (EC 6.4.1.1)				EC 4.1.1.3	Oxaloacetate decarboxylase alpha chain	Na+ translocating decarboxylases and related biotin-dependent enzymes;Pyruvate metabolism I: anaplerotic reactions, PEP	3.B.1	CPA
fig|6666666.214148.peg.2306	MM4TEC2__C5_L=178675=	90117+1220					K07007	uncharacterized protein		COG2081	S	hi0933 family								NAD(FAD)-utilizing dehydrogenases	- none -
fig|6666666.214148.peg.2307	MM4TEC2__C5_L=178675=	91363+1001					K00945	cytidylate kinase	EC:2.7.4.14	COG0283	F	Cytidine monophosphate kinase							EC 2.7.4.25	Cytidylate kinase	pyrimidine conversions					M00052,	Pyrimidine ribonucleotide biosynthesis, UMP => UDP/UTP,CDP/CTP;	Pathway module;	Nucleotide and amino acid metabolism;	Pyrimidine metabolism;
fig|6666666.214148.peg.2308	MM4TEC2__C5_L=178675=	92374+629					K00655	1-acyl-sn-glycerol-3-phosphate acyltransferase	EC:2.3.1.51	COG0204	I	Acyltransferase							EC 2.3.1.51	1-acyl-sn-glycerol-3-phosphate acyltransferase	Glycerolipid and Glycerophospholipid Metabolism in Bacteria					M00089,	Triacylglycerol biosynthesis;	Pathway module;	Carbohydrate and lipid metabolism;	Lipid metabolism;
fig|6666666.214148.peg.2309	MM4TEC2__C5_L=178675=	93000+2123					K03527	4-hydroxy-3-methylbut-2-enyl diphosphate reductase	EC:1.17.1.2	COG0539	J	thus facilitating recognition of the initiation point. It is needed to translate mRNA with a short Shine-Dalgarno (SD) purine-rich sequence (By similarity)								SSU ribosomal protein S1p	Cell division-ribosomal stress proteins cluster					M00096,	C5 isoprenoid biosynthesis, non-mevalonate pathway;	Pathway module;	Carbohydrate and lipid metabolism;	Terpenoid backbone biosynthesis;
fig|6666666.214148.peg.231	MM4TEC2__C2_L=1925355=	194044-593					K02121	V/A-type H+-transporting ATPase subunit E		ENOG4111U31	C	Produces ATP from ADP in the presence of a proton gradient across the membrane (By similarity)									- none -					M00159,	V/A-type ATPase, prokaryotes;	Structural complex;	Energy metabolism;	ATP synthesis;
fig|6666666.214148.peg.2310	MM4TEC2__C5_L=178675=	95183+1832					K04079	molecular chaperone HtpG		COG0326	O	Molecular chaperone. Has ATPase activity (By similarity)								Chaperone protein HtpG	Protein chaperones
fig|6666666.214148.peg.2311	MM4TEC2__C5_L=178675=	97117+803					K00858	NAD+ kinase	EC:2.7.1.23	COG0061	G	Catalyzes the phosphorylation of NAD to NADP. Utilizes ATP and other nucleoside triphosphates as well as inorganic polyphosphate as a source of phosphorus (By similarity)							EC 2.7.1.23	NAD kinase	NAD and NADP cofactor biosynthesis global
fig|6666666.214148.peg.2312	MM4TEC2__C5_L=178675=	97927+452					K03402	transcriptional regulator of arginine metabolism		COG1438	K	Regulates arginine biosynthesis genes (By similarity)								Arginine pathway regulatory protein ArgR, repressor of arg regulon	Arginine Biosynthesis -- gjo;Arginine Biosynthesis extended; <br>Arginine Deiminase Pathway; <br>Arginine and Ornithine Degradation
fig|6666666.214148.peg.2313	MM4TEC2__C5_L=178675=	98384+1694					K03631	DNA repair protein RecN (Recombination protein N)		COG0497	L	May be involved in recombinational repair of damaged DNA (By similarity)	DNA_0	Virulence	DNA repair protein RecN					DNA repair protein RecN	DNA repair, bacterial
fig|6666666.214148.peg.2314	MM4TEC2__C5_L=178675=	100196+1013					K06399	stage IV sporulation protein B	EC:3.4.21.116	COG0750	M	Membrane-associated zinc metalloprotease								Stage IV sporulation protein B	- none -
fig|6666666.214148.peg.2315	MM4TEC2__C5_L=178675=	101245+602																			- none -
fig|6666666.214148.peg.2316	MM4TEC2__C5_L=178675=	101857+1199					K01839	phosphopentomutase	EC:5.4.2.7	COG1015	G	Phosphotransfer between the C1 and C5 carbon atoms of pentose (By similarity)							EC 5.4.2.7	Phosphopentomutase	Deoxyribose and Deoxynucleoside Catabolism
fig|6666666.214148.peg.2317	MM4TEC2__C5_L=178675=	103037+830					K03783	purine-nucleoside phosphorylase	EC:2.4.2.1	COG0005	F	The purine nucleoside phosphorylases catalyze the phosphorolytic breakdown of the N-glycosidic bond in the beta- (deoxy)ribonucleoside molecules, with the formation of the corresponding free purine bases and pentose-1-phosphate (By similarity)							EC 2.4.2.1	Purine nucleoside phosphorylase	Adenosyl nucleosidases;Deoxyribose and Deoxynucleoside Catabolism; <br>Purine conversions; <br>pyrimidine conversions
fig|6666666.214148.peg.2318	MM4TEC2__C5_L=178675=	103979+1160					K07258	D-alanyl-D-alanine carboxypeptidase (penicillin-binding protein 5/6)	EC:3.4.16.4	COG1686	M	Carboxypeptidase				PbpG	Serum resistance|Cellular stability	D-alanyl-D-alanine endopeptidase	EC 3.4.16.4	D-alanyl-D-alanine carboxypeptidase	CBSS-84588.1.peg.1247;Metallocarboxypeptidases (EC 3.4.17.-); <br>Murein Hydrolases
fig|6666666.214148.peg.2319	MM4TEC2__C5_L=178675=	105278+1325				GT51	K01586	diaminopimelate decarboxylase	EC:4.1.1.20	COG0019	E	Specifically catalyzes the decarboxylation of meso- diaminopimelate (meso-DAP) to L-lysine (By similarity)	Diaminopimelate_0	Defense against host immune response	Diaminopimelate decarboxylase (EC 4.1.1.20)				EC 4.1.1.20	Diaminopimelate decarboxylase	Lysine Biosynthesis DAP Pathway;Lysine Biosynthesis DAP Pathway, GJO scratch					M00526,M00016,M00527,	Lysine biosynthesis, DAP dehydrogenase pathway, aspartate => lysine;Lysine biosynthesis, succinyl-DAP pathway, aspartate => lysine;Lysine biosynthesis, DAP aminotransferase pathway, aspartate => lysine;	Pathway module;	Nucleotide and amino acid metabolism;	Lysine metabolism;
fig|6666666.214148.peg.232	MM4TEC2__C2_L=1925355=	194500-446					K02124	V/A-type H+-transporting ATPase subunit K		COG0636	C	F(1)F(0) ATP synthase produces ATP from ADP in the presence of a proton or sodium gradient. F-type ATPases consist of two structural domains, F(1) containing the extramembraneous catalytic core and F(0) containing the membrane proton channel, linked together by a central stalk and a peripheral stalk. During catalysis, ATP synthesis in the catalytic domain of F(1) is coupled via a rotary mechanism…							EC 3.6.3.14	V-type ATP synthase subunit K	- none -	3.A.2	3.A.2			M00159,	V/A-type ATPase, prokaryotes;	Structural complex;	Energy metabolism;	ATP synthesis;
fig|6666666.214148.peg.2320	MM4TEC2__C5_L=178675=	106687+677								COG1994	S	metalloendopeptidase activity								FIG004556: membrane metalloprotease	A cluster relating to Tryptophanyl-tRNA synthetase	9.B.149	9.B.149
fig|6666666.214148.peg.2321	MM4TEC2__C5_L=178675=	107364+791					K05896	segregation and condensation protein A		COG1354	S	Participates in chromosomal partition during cell division. May act via the formation of a condensin-like complex containing Smc and ScpB that pull DNA away from mid-cell into both cell halves (By similarity)								Segregation and condensation protein A	- none -
fig|6666666.214148.peg.2322	MM4TEC2__C5_L=178675=	108130+731					K06024	segregation and condensation protein B		COG1386	K	Participates in chromosomal partition during cell division. May act via the formation of a condensin-like complex containing Smc and ScpA that pull DNA away from mid-cell into both cell halves (By similarity)	Segregation_0	Virulence	Segregation and condensation protein B					Segregation and condensation protein B	- none -
fig|6666666.214148.peg.2323	MM4TEC2__C5_L=178675=	110542-1625					K04077	chaperonin GroEL		COG0459	O	Prevents misfolding and promotes the refolding and proper assembly of unfolded polypeptides generated under stress conditions (By similarity)	Heat_0	Mitogenic	Heat shock protein 60 family chaperone GroEL					Heat shock protein 60 family chaperone GroEL	GroEL GroES
fig|6666666.214148.peg.2324	MM4TEC2__C5_L=178675=	110869-284					K04078	chaperonin GroES		COG0234	O	Binds to cpn60 in the presence of Mg-ATP and suppresses the ATPase activity of the latter (By similarity)								Heat shock protein 60 family co-chaperone GroES	GroEL GroES
fig|6666666.214148.peg.2325	MM4TEC2__C5_L=178675=	111116+461					K01493	dCMP deaminase	EC:3.5.4.12	COG2131	F	dCMP deaminase activity							EC 3.5.4.12	dCMP deaminase ; Late competence protein ComEB	- none -	3.A.11	3.A.11
fig|6666666.214148.peg.2326	MM4TEC2__C5_L=178675=	111579+527					K03768	peptidyl-prolyl cis-trans isomerase B (cyclophilin B)	EC:5.2.1.8	COG0652	O	peptidyl-prolyl cis-trans isomerase activity				Dot/Icm	Secretion system|Type IV secretion system	Dot/Icm type IV secretion system effector LirB	EC 5.2.1.8	Peptidyl-prolyl cis-trans isomerase	Queuosine-Archaeosine Biosynthesis	3.D.1	Mrp
fig|6666666.214148.peg.2327	MM4TEC2__C5_L=178675=	112131+836					K01273	membrane dipeptidase	EC:3.4.13.19	COG2355	E	Dipeptidase									- none -
fig|6666666.214148.peg.2328	MM4TEC2__C5_L=178675=	112972+1436					K01756	adenylosuccinate lyase	EC:4.3.2.2	COG0015	F	adenylosuccinate lyase	Adenylosuccinate_0	Virulence	Adenylosuccinate lyase (EC 4.3.2.2) SAICAR lyase (EC 4.3.2.2)				EC 4.3.2.2	Adenylosuccinate lyase @ SAICAR lyase	De Novo Purine Biosynthesis;Purine conversions					M00049,M00048,	Adenine ribonucleotide biosynthesis, IMP => ADP,ATP;Inosine monophosphate biosynthesis, PRPP + glutamine => IMP;	Pathway module;	Nucleotide and amino acid metabolism;	Purine metabolism;
fig|6666666.214148.peg.2329	MM4TEC2__C5_L=178675=	114486+1562					K07047	uncharacterized protein		COG1574	S	amidohydrolase								Exoenzymes regulatory protein AepA precursor	- none -
fig|6666666.214148.peg.233	MM4TEC2__C2_L=1925355=	196483-1961					K02123	V/A-type H+-transporting ATPase subunit I		COG1269	C	ATPase 116 kDa subunit							EC 3.6.3.14	V-type ATP synthase subunit I	- none -	3.A.2	3.A.2			M00159,	V/A-type ATPase, prokaryotes;	Structural complex;	Energy metabolism;	ATP synthesis;
fig|6666666.214148.peg.2330	MM4TEC2__C5_L=178675=	116672-590					K01356	repressor LexA	EC:3.4.21.88	COG1974	K	Represses a number of genes involved in the response to DNA damage (SOS response), including recA and lexA. In the presence of single-stranded DNA, RecA interacts with LexA causing an autocatalytic cleavage which disrupts the DNA-binding part of LexA, leading to derepression of the SOS regulon and eventually DNA repair (By similarity)							EC 3.4.21.88	SOS-response repressor and protease LexA	DNA repair, bacterial					M00729,	Fluoroquinolone resistance, gyrase-protecting protein Qnr;	Functional set;	Environmental information processing;	Drug resistance;
fig|6666666.214148.peg.2331	MM4TEC2__C5_L=178675=	116807+185																		Protein containing Zn-finger domain	- none -
fig|6666666.214148.peg.2332	MM4TEC2__C5_L=178675=	118214-1208					K03665	GTPase		COG2262	S	GTPase that associates with the 50S ribosomal subunit and may have a role during protein synthesis or ribosome biogenesis (By similarity)								GTP-binding protein HflX	Hfl operon
fig|6666666.214148.peg.2333	MM4TEC2__C5_L=178675=	119313-1067								COG0582	L	Integrase								Integrase/recombinase xerD	- none -
fig|6666666.214148.peg.2334	MM4TEC2__C5_L=178675=	121417-1874					K04771	serine protease Do	EC:3.4.21.107	COG0265	O	Serine protease	pepD	Chaperone|Protease	Probable secreted or membrane serine protease Rv0983						- none -
fig|6666666.214148.peg.2335	MM4TEC2__C5_L=178675=	122343-923					K04771	serine protease Do	EC:3.4.21.107	COG0265	O	Serine protease	HtrA_0	Chaperone|Cell-to-cell spread	HtrA proteasechaperone protein						- none -
fig|6666666.214148.peg.2336	MM4TEC2__C5_L=178675=	124240-1799			AlpGlucans	GH13	K00705	4-alpha-glucanotransferase	EC:2.4.1.25	COG0366	G	alpha amylase, catalytic	Trehalose_0	Virulence	Trehalose synthase (EC 5.4.99.16) Alpha-amylase (EC 3.2.1.1)				EC 3.2.1.135	Neopullulanase	Maltose and Maltodextrin Utilization			MF0066,	glycogen metabolism;
fig|6666666.214148.peg.2337	MM4TEC2__C5_L=178675=	126678-2432				GT35	K00688	starch phosphorylase	EC:2.4.1.1	COG0058	G	Phosphorylase is an important allosteric enzyme in carbohydrate metabolism. Enzymes from different sources differ in their regulatory mechanisms and in their natural substrates. However, all known phosphorylases share catalytic and structural properties (By similarity)							EC 2.4.1.1	Glycogen phosphorylase	Glycogen metabolism;Maltose and Maltodextrin Utilization			MF0066,	glycogen metabolism;	M00565,	Trehalose biosynthesis, D-glucose 1P => trehalose;	Pathway module;	Carbohydrate and lipid metabolism;	Sugar metabolism;
fig|6666666.214148.peg.2338	MM4TEC2__C5_L=178675=	128257-1529				GT5	K00703	starch synthase	EC:2.4.1.21	COG0297	G	starch synthase activity							EC 2.4.1.21	Glycogen synthase, ADP-glucose transglucosylase	Glycogen metabolism			MF0066,	glycogen metabolism;	M00565,	Trehalose biosynthesis, D-glucose 1P => trehalose;	Pathway module;	Carbohydrate and lipid metabolism;	Sugar metabolism;
fig|6666666.214148.peg.2339	MM4TEC2__C5_L=178675=	129383-1106				GT5	K00975	glucose-1-phosphate adenylyltransferase	EC:2.7.7.27	COG0448	G	Catalyzes the synthesis of ADP-glucose, a sugar donor used in elongation reactions on alpha-glucans (By similarity)								Glycogen biosynthesis protein GlgD, glucose-1-phosphate adenylyltransferase family	Glycogen metabolism			MF0066,	glycogen metabolism;	M00565,	Trehalose biosynthesis, D-glucose 1P => trehalose;	Pathway module;	Carbohydrate and lipid metabolism;	Sugar metabolism;
fig|6666666.214148.peg.234	MM4TEC2__C2_L=1925355=	196791-308																			- none -
fig|6666666.214148.peg.2340	MM4TEC2__C5_L=178675=	130587-1202					K00975	glucose-1-phosphate adenylyltransferase	EC:2.7.7.27	COG0448	G	Catalyzes the synthesis of ADP-glucose, a sugar donor used in elongation reactions on alpha-glucans (By similarity)	Glucose-1-phosphate_0	Virulence	Glucose-1-phosphate thymidylyltransferase (EC 2.7.7.24)	Capsule	Antiphagocytosis|Serum resistance	hypothetical protein	EC 2.7.7.27	Glucose-1-phosphate adenylyltransferase	Glycogen metabolism			MF0066,	glycogen metabolism;	M00565,	Trehalose biosynthesis, D-glucose 1P => trehalose;	Pathway module;	Carbohydrate and lipid metabolism;	Sugar metabolism;
fig|6666666.214148.peg.2341	MM4TEC2__C5_L=178675=	132535-1877			AlpGlucans	GH13	K00700	1,4-alpha-glucan branching enzyme	EC:2.4.1.18	COG0296	G	Catalyzes the formation of the alpha-1,6-glucosidic linkages in glycogen by scission of a 1,4-alpha-linked oligosaccharide from growing alpha-1,4-glucan chains and the subsequent attachment of the oligosaccharide to the alpha-1,6 position (By similarity)							EC 2.4.1.18	1,4-alpha-glucan (glycogen) branching enzyme, GH-13-type	Glycogen metabolism;Trehalose Biosynthesis			MF0066,	glycogen metabolism;	M00565,	Trehalose biosynthesis, D-glucose 1P => trehalose;	Pathway module;	Carbohydrate and lipid metabolism;	Sugar metabolism;
fig|6666666.214148.peg.2342	MM4TEC2__C5_L=178675=	132674-122																			- none -
fig|6666666.214148.peg.2343	MM4TEC2__C5_L=178675=	134380-1700								COG1401	V	restriction endodeoxyribonuclease activity									- none -
fig|6666666.214148.peg.2344	MM4TEC2__C5_L=178675=	135833-1436																			- none -
fig|6666666.214148.peg.2345	MM4TEC2__C5_L=178675=	136761-509			BacterialCW	GH23	K08309	soluble lytic murein transglycosylase [EC:3.2.1.-]		COG0741	M	transglycosylase				T3SS	Secretion system|Type III secretion system	putative transglycosylase signal peptide protein		Soluble lytic murein transglycosylase precursor (EC 3.2.1.-)	Murein Hydrolases
fig|6666666.214148.peg.2346	MM4TEC2__C5_L=178675=	137374-587					K00859	dephospho-CoA kinase	EC:2.7.1.24	COG0237	H	Catalyzes the phosphorylation of the 3'-hydroxyl group of dephosphocoenzyme A to form coenzyme A (By similarity)							EC 2.7.1.24	Dephospho-CoA kinase	Coenzyme A Biosynthesis					M00120,	Coenzyme A biosynthesis, pantothenate => CoA;	Pathway module;	Nucleotide and amino acid metabolism;	Cofactor and vitamin biosynthesis;
fig|6666666.214148.peg.2347	MM4TEC2__C5_L=178675=	139928-2567					K02335	DNA polymerase I	EC:2.7.7.7	COG0749	L	DNA polymerase							EC 2.7.7.7	DNA polymerase I	DNA Repair Base Excision
fig|6666666.214148.peg.2348	MM4TEC2__C5_L=178675=	140441-407								ENOG411283C	S	Tic20-like protein									- none -
fig|6666666.214148.peg.2349	MM4TEC2__C5_L=178675=	140838-296					K03534	L-rhamnose mutarotase	EC:5.1.3.32	COG3254	S	Involved in the anomeric conversion of L-rhamnose (By similarity)									- none -
fig|6666666.214148.peg.235	MM4TEC2__C2_L=1925355=	198229-1256				GT29	K01892	histidyl-tRNA synthetase	EC:6.1.1.21	COG0124	J	Histidyl-trna synthetase							EC 6.1.1.21	Histidyl-tRNA synthetase	tRNA aminoacylation, His					M00359,M00360,	Aminoacyl-tRNA biosynthesis, eukaryotes;Aminoacyl-tRNA biosynthesis, prokaryotes;	Functional set;	Metabolism;	Aminoacyl tRNA;
fig|6666666.214148.peg.2350	MM4TEC2__C5_L=178675=	141971-776					K07699	two-component system, response regulator, stage 0 sporulation protein A		COG0784	T	response regulator								Stage 0 sporulation two-component response regulator (Spo0A)	- none -
fig|6666666.214148.peg.2351	MM4TEC2__C5_L=178675=	142172-152																			- none -
fig|6666666.214148.peg.2352	MM4TEC2__C5_L=178675=	142968-794					K13292	phosphatidylglycerol:prolipoprotein diacylglycerol transferase [EC:2.-.-.-]		COG0682	M	Transfers the N-acyl diglyceride group on what will become the N-terminal cysteine of membrane lipoproteins (By similarity)								Prolipoprotein diacylglyceryl transferase (EC 2.4.99.-)	Lipoprotein Biosynthesis
fig|6666666.214148.peg.2353	MM4TEC2__C5_L=178675=	144555-1577								COG0488	S	(ABC) transporter	Zinc_0	Zinc uptake	Zinc ABC transporter, ATP-binding protein ZnuC	Acinetobactin	Iron uptake|Siderophore	enterochelin ABC transporter ATPase		ABC transporter ATP-binding protein uup	- none -	3.A.1	ABC
fig|6666666.214148.peg.2354	MM4TEC2__C5_L=178675=	144831-173																		Conserved domain protein	- none -
fig|6666666.214148.peg.2355	MM4TEC2__C5_L=178675=	145772-923								COG0330	O	Band 7 protein								Membrane protease family protein BA0301	- none -
fig|6666666.214148.peg.2356	MM4TEC2__C5_L=178675=	146291-425								COG1683	S	conserved protein								Uncharacterized protein YbbK	- none -
fig|6666666.214148.peg.2357	MM4TEC2__C5_L=178675=	146536+1460					K02824	uracil permease		COG2233	F	permease								Uracil permease	De Novo Pyrimidine Synthesis	2.A.40	APC
fig|6666666.214148.peg.2358	MM4TEC2__C5_L=178675=	148115+641					K00761	uracil phosphoribosyltransferase	EC:2.4.2.9	COG0035	F	Catalyzes the conversion of uracil and 5-phospho-alpha- D-ribose 1-diphosphate (PRPP) to UMP and diphosphate (By similarity)							EC 2.4.2.9	Uracil phosphoribosyltransferase	De Novo Pyrimidine Synthesis;pyrimidine conversions
fig|6666666.214148.peg.2359	MM4TEC2__C5_L=178675=	149831-1037								COG0398	S	Snare associated golgi protein									- none -
fig|6666666.214148.peg.236	MM4TEC2__C2_L=1925355=	199797-1523																			- none -
fig|6666666.214148.peg.2360	MM4TEC2__C5_L=178675=	150339-440					K03469	ribonuclease HI	EC:3.1.26.4	COG0328	L	ribonuclease H activity							EC 3.1.26.4	Ribonuclease HI	Ribonuclease H
fig|6666666.214148.peg.2361	MM4TEC2__C5_L=178675=	151155-812					K00286	pyrroline-5-carboxylate reductase	EC:1.5.1.2	COG0345	E	pyrroline-5-carboxylate reductase activity	Pyrroline-5-carboxylate_0	Intracellular survival and replication|Cellular metabolism	Pyrroline-5-carboxylate reductase (EC 1.5.1.2)				EC 1.5.1.2	Pyrroline-5-carboxylate reductase	A Hypothetical Protein Related to Proline Metabolism;Proline Synthesis					M00015,	Proline biosynthesis, glutamate => proline;	Pathway module;	Nucleotide and amino acid metabolism;	Arginine and proline metabolism;
fig|6666666.214148.peg.2362	MM4TEC2__C5_L=178675=	151503+731																			- none -
fig|6666666.214148.peg.2363	MM4TEC2__C5_L=178675=	152397+839																			- none -
fig|6666666.214148.peg.2364	MM4TEC2__C5_L=178675=	153247+8711																			- none -
fig|6666666.214148.peg.2365	MM4TEC2__C5_L=178675=	161955+3344																			- none -
fig|6666666.214148.peg.2366	MM4TEC2__C5_L=178675=	165296+887																			- none -
fig|6666666.214148.peg.2367	MM4TEC2__C5_L=178675=	166810-587								COG3481	S	Metal Dependent Phosphohydrolase									- none -
fig|6666666.214148.peg.2368	MM4TEC2__C5_L=178675=	167795-911								ENOG410XV6R	S	NA									- none -
fig|6666666.214148.peg.2369	MM4TEC2__C5_L=178675=	168636-839					K01624	fructose-bisphosphate aldolase, class II	EC:4.1.2.13	COG0191	G	Aldolase	kbaY	Biofilm	D-tagatose-1,6-bisphosphate aldolase subunit KbaY (EC 4.1.2.40)				EC 4.1.2.13	Fructose-bisphosphate aldolase class II	Glycolysis and Gluconeogenesis			MF0080,	Glycolysis (preparatory phase);
fig|6666666.214148.peg.237	MM4TEC2__C2_L=1925355=	200239-359								COG3862	S	protein with conserved CXXC pairs									- none -
fig|6666666.214148.peg.2370	MM4TEC2__C5_L=178675=	170035-1394								COG2407	G	Converts the aldose L-fucose into the corresponding ketose L-fuculose (By similarity)								Unknown pentose isomerase TM0951	- none -
fig|6666666.214148.peg.2371	MM4TEC2__C5_L=178675=	171509-1472					K00854	xylulokinase	EC:2.7.1.17	COG1070	G	Carbohydrate kinase									- none -			MF0055,MF0076,MF0078,	xylose degradation;arabitol degradation;xylitol degradation;
fig|6666666.214148.peg.2372	MM4TEC2__C5_L=178675=	171604+815								COG4936	T	Histidine kinase									- none -
fig|6666666.214148.peg.2373	MM4TEC2__C5_L=178675=	173413-962								COG1082	G	Xylose isomerase domain protein TIM barrel							EC 5.3.99.11	Inosose isomerase	- none -
fig|6666666.214148.peg.2374	MM4TEC2__C5_L=178675=	174514-1091			AnimalCarb	GH109				COG0673	S	oxidoreductase				LPS	Endotoxin	probable oxidoreductase	EC 1.1.1.18	Myo-inositol 2-dehydrogenase 1	- none -
fig|6666666.214148.peg.2375	MM4TEC2__C5_L=178675=	175242-713								COG1082	G	Xylose isomerase domain protein TIM barrel							EC 4.2.1.44	Inosose dehydratase	- none -
fig|6666666.214148.peg.2376	MM4TEC2__C5_L=178675=	175985-731								COG4813	G	Trehalose utilization protein									- none -
fig|6666666.214148.peg.2377	MM4TEC2__C5_L=178675=	177050-1064				GH0				COG0673	S	oxidoreductase	hypothetical_0	Virulence	hypothetical protein	LPS	Endotoxin	probable oxidoreductase	EC 1.1.1.18	Myo-inositol 2-dehydrogenase	- none -
fig|6666666.214148.peg.2378	MM4TEC2__C5_L=178675=	177188+779								COG4753	T	Transcriptional regulator (AraC family)									- none -
fig|6666666.214148.peg.2379	MM4TEC2__C6_L=560=	3+557																			- none -
fig|6666666.214148.peg.238	MM4TEC2__C2_L=1925355=	201482-1241								COG0446	S	pyridine nucleotide-disulfide oxidoreductase								Putative oxidoreductase	- none -
fig|6666666.214148.peg.2380	MM4TEC2__C7_L=601=	2+599																			- none -
fig|6666666.214148.peg.2381	MM4TEC2__C8_L=3820=	3+602																			- none -
fig|6666666.214148.peg.2382	MM4TEC2__C8_L=3820=	602+293																			- none -
fig|6666666.214148.peg.2383	MM4TEC2__C8_L=3820=	892+1625								ENOG410XT4Y	S	NA									- none -
fig|6666666.214148.peg.2384	MM4TEC2__C8_L=3820=	2527+257																			- none -
fig|6666666.214148.peg.2385	MM4TEC2__C8_L=3820=	2788+653																			- none -
fig|6666666.214148.peg.2386	MM4TEC2__C8_L=3820=	3413+359																			- none -
fig|6666666.214148.peg.239	MM4TEC2__C2_L=1925355=	202897-1418					K00111	glycerol-3-phosphate dehydrogenase	EC:1.1.5.3	COG0579	C	malate dehydrogenase (quinone)							EC 1.1.5.3	Glycerol-3-phosphate dehydrogenase	Glycerol and Glycerol-3-phosphate Uptake and Utilization;Glycerolipid and Glycerophospholipid Metabolism in Bacteria; <br>Respiratory dehydrogenases 1			MF0109,	glycerol degradation (glycerol kinase pathway);
fig|6666666.214148.peg.24	MM4TEC2__C1_L=46754=	16505-407																			- none -
fig|6666666.214148.peg.240	MM4TEC2__C2_L=1925355=	205139-2045			AlpGlucans	GH13				COG5492	N	ig domain protein group 2 domain protein								Phage tail tube protein	- none -
fig|6666666.214148.peg.241	MM4TEC2__C2_L=1925355=	207271-2072																			- none -
fig|6666666.214148.peg.242	MM4TEC2__C2_L=1925355=	209291-2003								ENOG410YUDY	S	NA									- none -
fig|6666666.214148.peg.243	MM4TEC2__C2_L=1925355=	211165-1844								ENOG410YUDY	S	NA									- none -
fig|6666666.214148.peg.244	MM4TEC2__C2_L=1925355=	212063-884				GH130	K02026	multiple sugar transport system permease protein		COG0395	G	Binding-protein-dependent transport systems inner membrane component	N-acetyl-D-glucosamine_0	Virulence	N-acetyl-D-glucosamine ABC transporter, permease protein 2					N-Acetyl-D-glucosamine ABC transport system, permease protein 2	- none -	3.A.1	ABC
fig|6666666.214148.peg.245	MM4TEC2__C2_L=1925355=	212991-926					K02025	multiple sugar transport system permease protein		COG1175	P	binding-protein-dependent transport systems inner membrane Component	N-acetyl-D-glucosamine_0	Virulence	N-acetyl-D-glucosamine ABC transporter, permease protein 1					Sugar ABC transporter, permease protein	- none -	3.A.1	ABC			M00207,	Putative multiple sugar transport system;	Structural complex;	Environmental information processing;	Saccharide, polyol, and lipid transport system;
fig|6666666.214148.peg.246	MM4TEC2__C2_L=1925355=	214376-1379					K02027	multiple sugar transport system substrate-binding protein		COG1653	G	transporter activity									- none -					M00207,	Putative multiple sugar transport system;	Structural complex;	Environmental information processing;	Saccharide, polyol, and lipid transport system;
fig|6666666.214148.peg.247	MM4TEC2__C2_L=1925355=	215516-1028			Fructans	GH32	K02529	LacI family transcriptional regulator		COG1609	K	Transcriptional regulator									- none -
fig|6666666.214148.peg.248	MM4TEC2__C2_L=1925355=	215695+770								COG1145	C	4Fe-4S ferredoxin, iron-sulfur binding									- none -
fig|6666666.214148.peg.249	MM4TEC2__C2_L=1925355=	217549-1052					K01599	uroporphyrinogen decarboxylase	EC:4.1.1.37	ENOG4111F46	S	Uroporphyrinogen decarboxylase (URO-D)									- none -					M00121,	Heme biosynthesis, glutamate => protoheme/siroheme;	Pathway module;	Nucleotide and amino acid metabolism;	Cofactor and vitamin biosynthesis;
fig|6666666.214148.peg.25	MM4TEC2__C1_L=46754=	16872+464																			- none -
fig|6666666.214148.peg.250	MM4TEC2__C2_L=1925355=	218594-1043					K02529	LacI family transcriptional regulator		COG1609	K	Transcriptional regulator									- none -
fig|6666666.214148.peg.251	MM4TEC2__C2_L=1925355=	219455-857				GH130	K02026	multiple sugar transport system permease protein		COG0395	G	Binding-protein-dependent transport systems inner membrane component	N-acetyl-D-glucosamine_0	Virulence	N-acetyl-D-glucosamine ABC transporter, permease protein 2					N-Acetyl-D-glucosamine ABC transport system, permease protein 2	- none -	3.A.1	ABC
fig|6666666.214148.peg.252	MM4TEC2__C2_L=1925355=	220374-917					K02025	multiple sugar transport system permease protein		COG1175	P	binding-protein-dependent transport systems inner membrane Component	N-acetyl-D-glucosamine_0	Virulence	N-acetyl-D-glucosamine ABC transporter, permease protein 1					N-Acetyl-D-glucosamine ABC transport system, permease protein 1	- none -	3.A.1	ABC			M00207,	Putative multiple sugar transport system;	Structural complex;	Environmental information processing;	Saccharide, polyol, and lipid transport system;
fig|6666666.214148.peg.253	MM4TEC2__C2_L=1925355=	221813-1430					K02027	multiple sugar transport system substrate-binding protein		COG1653	G	transporter activity									- none -					M00207,	Putative multiple sugar transport system;	Structural complex;	Environmental information processing;	Saccharide, polyol, and lipid transport system;
fig|6666666.214148.peg.254	MM4TEC2__C2_L=1925355=	224213-2390																			- none -
fig|6666666.214148.peg.255	MM4TEC2__C2_L=1925355=	227554-3344																			- none -
fig|6666666.214148.peg.256	MM4TEC2__C2_L=1925355=	227903+581					K09967	uncharacterized protein		COG3665	S	Urea carboxylase-associated protein							EC 2.1.2.10	Aminomethyltransferase	- none -
fig|6666666.214148.peg.257	MM4TEC2__C2_L=1925355=	230992-2456								COG1073	S	Hydrolase									- none -
fig|6666666.214148.peg.258	MM4TEC2__C2_L=1925355=	232202-1199																			- none -
fig|6666666.214148.peg.259	MM4TEC2__C2_L=1925355=	233427-1181								ENOG41122ZR	S	NA									- none -
fig|6666666.214148.peg.26	MM4TEC2__C1_L=46754=	17336+5150																			- none -
fig|6666666.214148.peg.260	MM4TEC2__C2_L=1925355=	234684-1175					K00027	malate dehydrogenase (oxaloacetate-decarboxylating)	EC:1.1.1.38	COG0281	C	malic enzyme							EC 1.1.1.40	NADP-dependent malic enzyme	Pyruvate metabolism I: anaplerotic reactions, PEP
fig|6666666.214148.peg.261	MM4TEC2__C2_L=1925355=	234813+899								COG0583	K	Transcriptional regulator								Transcriptional regulator, LysR family	- none -
fig|6666666.214148.peg.262	MM4TEC2__C2_L=1925355=	237287-1520				GH0				ENOG410XT3T	S	hydrolase family 2, sugar binding									- none -
fig|6666666.214148.peg.263	MM4TEC2__C2_L=1925355=	238077-671								ENOG4111MFR	S	NA									- none -
fig|6666666.214148.peg.264	MM4TEC2__C2_L=1925355=	239218-1118								ENOG4112A0I	S	NA									- none -
fig|6666666.214148.peg.265	MM4TEC2__C2_L=1925355=	240266-1025					K01599	uroporphyrinogen decarboxylase	EC:4.1.1.37	ENOG4111QGA	S	Uroporphyrinogen decarboxylase (URO-D)									- none -					M00121,	Heme biosynthesis, glutamate => protoheme/siroheme;	Pathway module;	Nucleotide and amino acid metabolism;	Cofactor and vitamin biosynthesis;
fig|6666666.214148.peg.266	MM4TEC2__C2_L=1925355=	241307-1007					K02529	LacI family transcriptional regulator		COG1609	K	Transcriptional regulator									- none -
fig|6666666.214148.peg.267	MM4TEC2__C2_L=1925355=	243553-2249				GH65	K18784	3-O-alpha-D-glucosyl-L-rhamnose phosphorylase	EC:2.4.1.282	COG1554	G	hydrolase family 65							EC 2.4.1.8;EC 2.4.1.64	Maltose phosphorylase / Trehalose phosphorylase	Maltose and Maltodextrin Utilization;Trehalose Biosynthesis; <br>Trehalose Uptake and Utilization
fig|6666666.214148.peg.268	MM4TEC2__C2_L=1925355=	245054-1499								ENOG410XPBJ	S	ADP-ribosylation crystallin J1									- none -
fig|6666666.214148.peg.269	MM4TEC2__C2_L=1925355=	245959-881				GH42	K10119	raffinose/stachyose/melibiose transport system permease protein		COG0395	G	Binding-protein-dependent transport systems inner membrane component	N-acetyl-D-glucosamine_0	Virulence	N-acetyl-D-glucosamine ABC transporter, permease protein 2						- none -	3.A.1	ABC			M00196,	Raffinose/stachyose/melibiose transport system;	Structural complex;	Environmental information processing;	Saccharide, polyol, and lipid transport system;
fig|6666666.214148.peg.27	MM4TEC2__C1_L=46754=	23044-116																			- none -
fig|6666666.214148.peg.270	MM4TEC2__C2_L=1925355=	246860-908					K10118	raffinose/stachyose/melibiose transport system permease protein		COG1175	P	binding-protein-dependent transport systems inner membrane Component	N-acetyl-D-glucosamine_0	Virulence	N-acetyl-D-glucosamine ABC transporter, permease protein 1						- none -	3.A.1	ABC			M00196,	Raffinose/stachyose/melibiose transport system;	Structural complex;	Environmental information processing;	Saccharide, polyol, and lipid transport system;
fig|6666666.214148.peg.271	MM4TEC2__C2_L=1925355=	248265-1391					K10117	raffinose/stachyose/melibiose transport system substrate-binding protein		COG1653	G	transporter activity									- none -					M00196,	Raffinose/stachyose/melibiose transport system;	Structural complex;	Environmental information processing;	Saccharide, polyol, and lipid transport system;
fig|6666666.214148.peg.272	MM4TEC2__C2_L=1925355=	250372-1997			PlantCW	GH28				ENOG4111S5U	M	Glycosyl hydrolases family 28									- none -
fig|6666666.214148.peg.273	MM4TEC2__C2_L=1925355=	252327-1958																			- none -
fig|6666666.214148.peg.274	MM4TEC2__C2_L=1925355=	253793-479					K07095	uncharacterized protein		COG0622	S	Phosphodiesterase, mj0936 family								FIG009886: phosphoesterase	Heat shock dnaK gene cluster extended
fig|6666666.214148.peg.275	MM4TEC2__C2_L=1925355=	254377-587					K02428	XTP/dITP diphosphohydrolase	EC:3.6.1.66	COG0127	F	Pyrophosphatase that hydrolyzes non-canonical purine nucleotides such as XTP and ITP dITP to their respective monophosphate derivatives. Might exclude non-canonical purines from DNA precursor pool, thus preventing their incorporation into DNA and avoiding chromosomal lesions (By similarity)				LOS	Adherence|Endotoxin	putative deoxyribonucleotide triphosphate pyrophosphatase	EC 3.6.1.15	Nucleoside 5-triphosphatase RdgB (dHAPTP, dITP, XTP-specific)	Heat shock dnaK gene cluster extended;Housecleaning nucleoside triphosphate pyrophosphatases
fig|6666666.214148.peg.276	MM4TEC2__C2_L=1925355=	255893-1439				GT2				ENOG410XNMH	T	Histidine kinase	Two-component_0	Two-component system|Stress|Two-component system|Stress|Antibiotics resistance	Two-component system sensor histidine kinase					Osmosensitive K+ channel histidine kinase KdpD (EC 2.7.3.-)	Potassium homeostasis
fig|6666666.214148.peg.277	MM4TEC2__C2_L=1925355=	256561-671				GT2				COG0745	T	regulatoR	regX3	Virulence	Phosphate regulon transcriptional regulatory protein PhoB (SphR)					Phosphate regulon transcriptional regulatory protein PhoB (SphR)	High affinity phosphate transporter and control of PHO regulon;PhoR-PhoB two-component regulatory system; <br>Phosphate metabolism
fig|6666666.214148.peg.278	MM4TEC2__C2_L=1925355=	256744+1256								COG4277	S	radical SAM domain protein								Biotin synthase related domain containing protein	- none -
fig|6666666.214148.peg.279	MM4TEC2__C2_L=1925355=	257997+737								ENOG4111MJI	S	DNA metabolism protein									- none -
fig|6666666.214148.peg.28	MM4TEC2__C1_L=46754=	23166+623																			- none -
fig|6666666.214148.peg.280	MM4TEC2__C2_L=1925355=	259260-509					K03594	bacterioferritin	EC:1.16.3.1	COG1633	S	Rubrerythrin									- none -
fig|6666666.214148.peg.281	MM4TEC2__C2_L=1925355=	259781-461								ENOG4111W24	S	Putative redox-active protein (C_GCAxxG_C_C)								C_GCAxxG_C_C family protein	- none -
fig|6666666.214148.peg.282	MM4TEC2__C2_L=1925355=	259829+503					K06133	4'-phosphopantetheinyl transferase [EC:2.7.8.-]		COG2091	H	4'-phosphopantetheinyl transferase									- none -
fig|6666666.214148.peg.283	MM4TEC2__C2_L=1925355=	260875+353								ENOG410YV1A	S	NA									- none -
fig|6666666.214148.peg.284	MM4TEC2__C2_L=1925355=	261251+593								ENOG410XUX9	K	Transcriptional regulator								Transcriptional regulator, AcrR family	- none -
fig|6666666.214148.peg.285	MM4TEC2__C2_L=1925355=	263364-1478					K01804	L-arabinose isomerase	EC:5.3.1.4	COG2160	G	Catalyzes the conversion of L-arabinose to L-ribulose (By similarity)								putative L-arabinose isomerase	- none -			MF0054,	arabinose degradation;
fig|6666666.214148.peg.286	MM4TEC2__C2_L=1925355=	263490+878								ENOG4111G16	K	Transcriptional regulator (AraC family)									- none -
fig|6666666.214148.peg.287	MM4TEC2__C2_L=1925355=	266462-2075			PlantCW	GH36	K07407	alpha-galactosidase	EC:3.2.1.22	COG3345	G	alpha-galactosidase							EC 3.2.1.22	Alpha-galactosidase	Galactosylceramide and Sulfatide metabolism;Lactose and Galactose Uptake and Utilization			MF0050,	melibiose degradation;
fig|6666666.214148.peg.288	MM4TEC2__C2_L=1925355=	267048-473																			- none -
fig|6666666.214148.peg.289	MM4TEC2__C2_L=1925355=	267954-821					K10979	DNA end-binding protein Ku		COG1273	L	Could be involved in DNA repair (By similarity)								Ku domain protein	Bacillus subtilis scratch - gjo;DNA Repair Base Excision; <br>DNA ligases; <br>Nonhomologous End-Joining in Bacteria
fig|6666666.214148.peg.29	MM4TEC2__C1_L=46754=	24155-242																			- none -
fig|6666666.214148.peg.290	MM4TEC2__C2_L=1925355=	268951-866																			- none -
fig|6666666.214148.peg.291	MM4TEC2__C2_L=1925355=	270396-1442					K01897	long-chain acyl-CoA synthetase	EC:6.2.1.3	COG0318	IQ	Amp-dependent synthetase and ligase	Long-chain-fatty-acid--CoA_0	Virulence	Long-chain-fatty-acid--CoA ligase (EC 6.2.1.3)				EC 6.2.1.3	Long-chain-fatty-acid--CoA ligase	Biotin biosynthesis	4.C.1	4.C.1			M00086,	beta-Oxidation, acyl-CoA synthesis;	Pathway module;	Carbohydrate and lipid metabolism;	Fatty acid metabolism;
fig|6666666.214148.peg.292	MM4TEC2__C2_L=1925355=	270635-242																			- none -
fig|6666666.214148.peg.293	MM4TEC2__C2_L=1925355=	271737-1037																		Putative tail fiber (ACLAME 4)	- none -
fig|6666666.214148.peg.294	MM4TEC2__C2_L=1925355=	271904+518					K03823	phosphinothricin acetyltransferase	EC:2.3.1.183	COG1247	M	N-acetyltransferase								N-acetyltransferase, GCN5-family	- none -
[truncated: 877 more rows]

## Sheet: growth
Predicted minimum generation time: 3.98 hours +/- 0.54
[truncated: 1 more rows]

[truncated: 7 more sheets: TCDB, ARDB, CZy, GMM, KEGG, SEED_mods, Caption]
